# Supplementary material for: Gold-catalyzed intermolecular oxidation of chiral homopropargyl sulfonamides: a reliable access to enantioenriched pyrrolidin-3-ones
Source: Royal Society of Chemistry journal article supplement (doi:10.1039/c3cc49238a), 2014-01-01

## Supporting Information

### **Gold-Catalyzed Intermolecular Oxidation of Chiral Homopropargyl Amides: A Reliable Access to Enantioenriched Pyrrolidin-3-ones**

Chao Shu, Long Li, Yong-Fei Yu, Shuang Jiang, and Long-Wu Ye\*

State Key Laboratory for Physical Chemistry of Solid Surfaces, The Key Laboratory for  
Chemical Biology of Fujian Province and Department of Chemistry, College of  
Chemistry and Chemical Engineering, Xiamen University, Xiamen, 361005, Fujian, P. R.  
China

| <b>Content</b>                                      | <b>Page number</b> |
|-----------------------------------------------------|--------------------|
| <b>General</b>                                      | 2                  |
| <b>Preparation of Starting Materials</b>            | 2                  |
| <b>General Procedure: Gold Catalysis</b>            | 9                  |
| <b>HPLC Chromatograms</b>                           | 23                 |
| <b><sup>1</sup>H and <sup>13</sup>C NMR spectra</b> | 58                 |

**General Information.** Ethyl acetate (ACS grade), hexanes (ACS grade) and anhydrous 1, 2-dichloroethane (ACS grade) were obtained commercially and used without further purification. Methylene chloride, tetrahydrofuran and diethyl ether were purified according to standard methods unless otherwise noted. Commercially available reagents were used without further purification. Reactions were monitored by thin layer chromatography (TLC) using silicycle pre-coated silica gel plates. Flash column chromatography was performed over silica gel (300-400 mesh). Infrared spectra were recorded on a Nicolet AVATER FTIR330 spectrometer as thin film and are reported in reciprocal centimeter ( $\text{cm}^{-1}$ ). Mass spectra were recorded with Micromass QTOF2 Quadrupole/Time-of-Flight Tandem mass spectrometer using electron spray ionization.

$^1\text{H}$  NMR spectra were recorded on a Bruker AV-400 spectrometer and a Bruker AV-500 spectrometer in chloroform- $\text{d}_3$ . Chemical shifts are reported in ppm with the internal TMS signal at 0.0 ppm as a standard. The data is being reported as (s = singlet, d = doublet, t = triplet, m = multiplet or unresolved, brs = broad singlet, coupling constant(s) in Hz, integration).

$^{13}\text{C}$  NMR spectra were recorded on on a Bruker AV-400 spectrometer and a Bruker AV-500 spectrometer in chloroform- $\text{d}_3$ . Chemical shifts are reported in ppm with the internal chloroform signal at 77.0 ppm as a standard.

Compounds **1a-1s** were prepared according to the known procedures.<sup>1-2</sup> Compounds **1a-1p** are known compounds,<sup>2</sup> except **1i**.

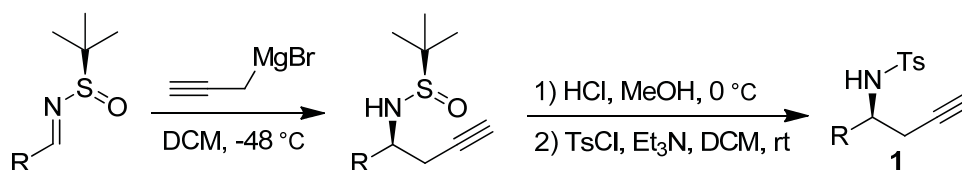

**(R)-4-methyl-N-(undec-1-yn-4-yl)benzenesulfonamide (1a)**

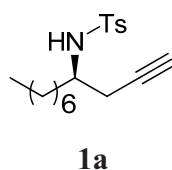

99% ee (determined by HPLC: Chiralcel AD-H Column, 10/90 *i*-PrOH/hexane, 0.8 mL/min, 200 nm; TR = 11.65 min (major), 10.49 min (minor)).

**(*S*)-N-(1-cyclohexylbut-3-yn-1-yl)-4-methylbenzenesulfonamide (1b)**

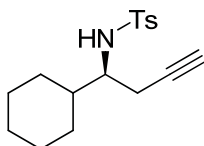

**1b**

>99% ee (determined by HPLC: Chiralpak IC Column, 10/90 *i*-PrOH/hexane, 0.6 mL/min, 200 nm; TR = 26.60 min (major), 30.09 min (minor)).

**(*R*)-4-methyl-N-(1-phenylhex-5-yn-3-yl)benzenesulfonamide (1c)**

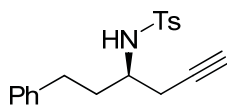

**1c**

99% ee (determined by HPLC: Chiralpak IC Column, 10/90 *i*-PrOH/hexane, 0.6 mL/min, 200 nm; TR = 30.23 min (major), 36.29 min (minor)).

**(*R*)-N-(7-azidohept-1-yn-4-yl)-4-methylbenzenesulfonamide (1d)**

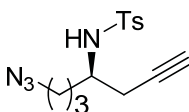

**1d**

98% ee (determined by HPLC: Chiralpak IC Column, 10/90 *i*-PrOH/hexane, 1.0 mL/min, 200 nm; TR = 25.78 min (major), 29.46 min (minor)).

**(*R*)-N-(7-(1,3-dioxisoindolin-2-yl)hept-1-yn-4-yl)-4-methylbenzenesulfonamide (1e)**

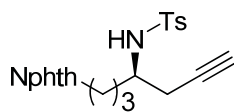

**1e**

97% ee (determined by HPLC: Chiralpak IC Column, 10/90 *i*-PrOH/hexane, 0.6 mL/min, 200 nm; TR = 58.43 min (major), 45.32 min (minor)).

**(*R*)-N-(7-(benzyloxy)hept-1-yn-4-yl)-4-methylbenzenesulfonamide (1f)**

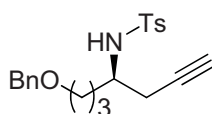

**1f**

98% ee (determined by HPLC: Chiralpak IC Column, 10/90 *i*-PrOH/hexane, 0.6 mL/min, 200 nm; TR = 53.42 min (major), 65.41 min (minor)).

**(*S*)-4-methyl-N-(1-phenylbut-3-yn-1-yl)benzenesulfonamide (1g)**

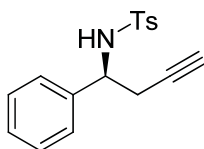

**1g**

99% ee (determined by HPLC: Chiralpak IC Column, 10/90 *i*-PrOH/hexane, 0.6 mL/min, 200 nm; TR = 48.73 min (major), 45.73 min (minor)).

**(*S*)-4-methyl-N-(1-(naphthalen-1-yl)but-3-yn-1-yl)benzenesulfonamide (1h)**

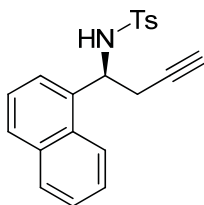

**1h**

98% ee (determined by HPLC: Chiralpak IC Column, 10/90 *i*-PrOH/hexane, 1.0 mL/min, 200 nm; TR = 35.54 min (major), 29.35 min (minor)).

**(*S*)-N-(1-(4-fluorophenyl)but-3-yn-1-yl)-4-methylbenzenesulfonamide (1i)**

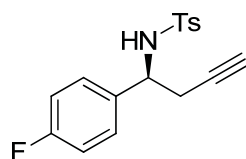

**1i**

$[\alpha]_D^{20} = -117.0^\circ$  ( $c = 1.0$ ,  $\text{CHCl}_3$ ). 98% ee (determined by HPLC: Chiralpak IA Column, 8/92 *i*-PrOH/hexane, 0.6 mL/min, 200 nm; TR = 34.27 min (major), 36.30 min (minor)).  $^1\text{H}$  NMR (400 MHz,  $\text{CDCl}_3$ )  $\delta$  7.61 (d, 2H,  $J = 8.4$  Hz), 7.17 – 7.11 (m, 4H), 6.85 (t, 2H,  $J = 8.8$  Hz), 5.73 (d, 1H,  $J = 7.2$  Hz), 4.49 (q, 1H,  $J = 6.4$  Hz), 2.59 (dd, 2H,  $J = 2.4$  Hz,  $J = 6.0$  Hz), 2.37 (s, 3H), 1.96 (t, 1H,  $J = 2.4$  Hz);  $^{13}\text{C}$  NMR (125 MHz,  $\text{CDCl}_3$ )  $\delta$  162.1 (d,  $J = 306.1$  Hz), 143.4, 137.1, 135.2 (d,  $J = 4.0$  Hz), 129.4, 128.3 (d,  $J = 10.3$  Hz), 127.0, 115.0 (d,  $J = 26.9$  Hz), 78.9, 72.1, 55.2, 27.2, 21.3; IR (neat): 3291(bs), 2924, 2122, 1604, 1512, 1333, 1158, 834, 737, 705, 666, 577, 550; MS (ESI,  $m/z$ ): 340 ( $\text{M} + \text{Na}^+$ ). HRESIMS Calcd for  $[\text{C}_{17}\text{H}_{16}\text{FNNaO}_2\text{S}]^+$  ( $\text{M} + \text{Na}^+$ ) 340.0785; Found 340.0783.

**(*S*)-N-(1-(4-chlorophenyl)but-3-yn-1-yl)-4-methylbenzenesulfonamide (1j)**

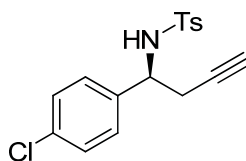

**1j**

98% ee (determined by HPLC: Chiralpak IC Column, 10/90 *i*-PrOH/hexane, 0.6 mL/min, 200 nm; TR = 39.07 min (major), 34.85 min (minor)).

**(*S*)-N-(1-(4-bromophenyl)but-3-yn-1-yl)-4-methylbenzenesulfonamide (1k)**

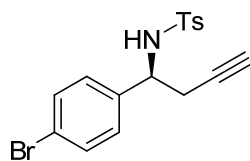

**1k**

99% ee (determined by HPLC: Chiralpak IC Column, 10/90 *i*-PrOH/hexane, 0.6 mL/min, 200 nm; TR = 42.07 min (major), 37.29 min (minor)).

**(S)-N-(1-(2-bromophenyl)but-3-yn-1-yl)-4-methylbenzenesulfonamide (1l)**

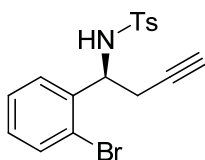

**1l**

97% ee (determined by HPLC: Chiralpak IC Column, 10/90 *i*-PrOH/hexane, 0.6 mL/min, 200 nm; TR = 63.13 min (major), 40.70 min (minor)).

**(S)-4-methyl-N-(1-(p-tolyl)but-3-yn-1-yl)benzenesulfonamide (1m)**

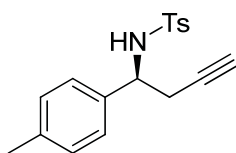

**1m**

99% ee (determined by HPLC: Chiralpak IC Column, 10/90 *i*-PrOH/hexane, 0.6 mL/min, 200 nm; TR = 53.51 min (major), 56.69 min (minor)).

**(S)-N-(1-(4-methoxyphenyl)but-3-yn-1-yl)-4-methylbenzenesulfonamide (1n)**

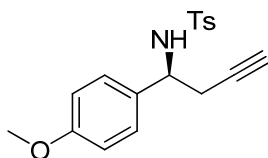

### 1n

99% ee (determined by HPLC: Chiralpak IC Column, 10/90 *i*-PrOH/hexane, 0.6 mL/min, 200 nm; TR = 38.75 min (major), 36.35 min (minor)).

### 4-methyl-N-(pent-3-yn-1-yl)benzenesulfonamide (1o')

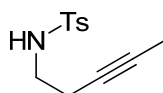

$^1\text{H}$  NMR (400 MHz,  $\text{CDCl}_3$ )  $\delta$  7.76 (d, 2H,  $J = 8.4$  Hz), 7.31 (d, 2H,  $J = 8.0$  Hz), 4.91 (t, 1H,  $J = 6.4$  Hz), 3.05 (dd, 2H,  $J = 6.4$  Hz,  $J = 8.8$  Hz), 2.43 (s, 3H), 2.30 – 2.25 (m, 2H), 1.74 (t, 3H,  $J = 2.8$  Hz);  $^{13}\text{C}$  NMR (100 MHz,  $\text{CDCl}_3$ )  $\delta$  143.4, 137.0, 129.7, 127.0, 78.3, 74.9, 42.0, 21.5, 19.9, 3.4; IR (neat): 3283, 2920, 2850, 2174, 1598, 1422, 1327, 1160, 1093, 815, 662; MS (ESI,  $m/z$ ): 260 ( $\text{M} + \text{Na}^+$ ). HRESIMS Calcd for  $[\text{C}_{12}\text{H}_{15}\text{NNaO}_2\text{S}]^+$  ( $\text{M} + \text{Na}^+$ ) 260.0721; Found 260.0721.

### (R)-4-bromo-N-(undec-1-yn-4-yl)benzenesulfonamide (1q)

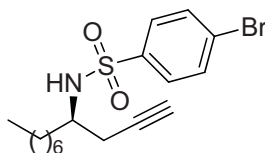

### 1q

$[\alpha]_{\text{D}}^{20} = +43.4^\circ$  ( $c = 0.3$ ,  $\text{CHCl}_3$ ). 99% ee (determined by HPLC: Chiralcel IB Column, 5/95 *i*-PrOH/hexane, 0.6 mL/min, 200 nm; TR = 16.13 min (major), 18.26 min (minor)).  $^1\text{H}$  NMR (400 MHz,  $\text{CDCl}_3$ )  $\delta$  7.75 (d, 2H,  $J = 12.4$  Hz), 7.65 (d, 2H,  $J = 10.8$  Hz), 4.69 (d, 1H,  $J = 7.2$  Hz), 3.39 – 3.33 (m, 1H), 2.30 (dd, 2H,  $J = 1.2$  Hz,  $J = 3.6$  Hz), 1.98 (t, 1H,  $J = 2.4$  Hz), 1.55 – 1.47 (m, 2H), 1.31 – 1.23 (m, 2H), 1.22 – 1.10 (m, 8H), 0.88 (t, 3H,  $J = 6.0$  Hz);  $^{13}\text{C}$  NMR (100 MHz,  $\text{CDCl}_3$ )  $\delta$  140.2, 132.3, 128.6, 127.5, 79.2, 71.6, 52.0, 34.1, 31.7, 29.0, 25.6, 25.1, 22.6, 14.0; IR (neat): 3287, 2926, 2855, 2121(s), 1575, 1468, 1429, 1332, 1163, 1092, 1068, 739, 611; MS (ESI,  $m/z$ ): 408 ( $\text{M} + \text{Na}^+$ ). HRESIMS Calcd for  $[\text{C}_{17}\text{H}_{24}\text{BrNNaO}_2\text{S}]^+$  ( $\text{M} + \text{Na}^+$ ) 408.0609; Found 408.0607.

**(R)-2-nitro-N-(undec-1-yn-4-yl)benzenesulfonamide (1r)**

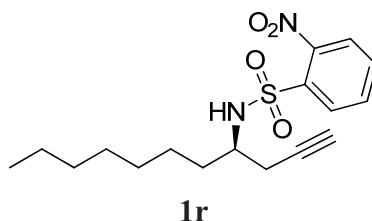

$[\alpha]_{\text{D}}^{20} = +26.4^{\circ}$  ( $c = 1.0$ ,  $\text{CHCl}_3$ ). 99% ee (determined by HPLC: Chiralcel IB Column, 5/95 *i*-PrOH/hexane, 0.6 mL/min, 200 nm; TR = 26.85 min (major), 28.82 min (minor)).  $^1\text{H}$  NMR (400 MHz,  $\text{CDCl}_3$ )  $\delta$  8.17 – 8.14 (m, 1H), 7.90 – 7.87 (m, 1H), 7.78 – 7.72 (m, 2H), 5.53 (d, 1H,  $J = 6.8$  Hz), 3.64 – 3.57 (m, 1H), 2.37 (dd, 2H,  $J = 2.0$  Hz,  $J = 4.0$  Hz), 1.92 (t, 1H,  $J = 2.4$  Hz), 1.66 – 1.53 (m, 2H), 1.34 – 1.07 (m, 10H), 0.86 (t, 3H,  $J = 5.6$  Hz);  $^{13}\text{C}$  NMR (100 MHz,  $\text{CDCl}_3$ )  $\delta$  147.6, 135.0, 133.4, 132.9, 130.3, 125.3, 79.0, 71.3, 53.3, 34.0, 31.5, 28.9, 25.4, 25.2, 22.5, 13.9; IR (neat): 3301, 2928, 2857, 2124(s), 1541, 1442, 1418, 1361, 1169, 1125, 851, 599; MS (ESI,  $m/z$ ): 375 ( $\text{M} + \text{Na}^+$ ). HRESIMS Calcd for  $[\text{C}_{17}\text{H}_{24}\text{N}_2\text{NaO}_4\text{S}]^+$  ( $\text{M} + \text{Na}^+$ ) 375.1354; Found 375.1354.

**(R)-4-methyl-N-(13-phenyltridec-1-yn-4-yl)benzenesulfonamide (1s)**

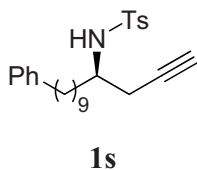

$[\alpha]_{\text{D}}^{20} = +31.3^{\circ}$  ( $c = 1.0$ ,  $\text{CHCl}_3$ ). 99% ee (determined by HPLC: Chiralcel AD-H Column, 5/95 *i*-PrOH/hexane, 0.8 mL/min, 200 nm; TR = 26.62 min (major), 22.34 min (minor)).  $^1\text{H}$  NMR (400 MHz,  $\text{CDCl}_3$ )  $\delta$  7.76 (d, 2H,  $J = 8.0$  Hz), 7.27 (t, 4H,  $J = 8.8$  Hz), 7.18 – 7.15 (m, 3H), 4.67 (d, 1H,  $J = 9.2$  Hz), 3.36 – 3.28 (m, 1H), 2.60 (t, 2H,  $J = 7.6$  Hz), 2.41 (s, 3H), 2.27 – 2.56 (m, 2H), 1.97 (t, 1H,  $J = 2.8$  Hz), 1.64 – 1.46 (m, 4H), 1.32 – 1.24 (m, 4H), 1.20 – 1.14 (m, 8H);  $^{13}\text{C}$  NMR (100 MHz,  $\text{CDCl}_3$ )  $\delta$  143.4, 142.8, 138.1, 129.6, 128.4, 128.2, 127.0, 125.5, 79.4, 71.4, 51.7, 35.9, 34.0, 31.5, 29.4, 29.4, 29.3, 29.2, 29.1,



25.5, 24.9, 21.5; IR (neat): 3357, 2923, 2852, 2093, 1660, 1600, 1465, 1328, 1275, 1260, 1159, 750; MS (ESI,  $m/z$ ): 448 ( $M + Na^+$ ). HRESIMS Calcd for  $[C_{26}H_{35}NNaO_2S]^+$  ( $M + Na^+$ ) 448.2288; Found 448.2286.

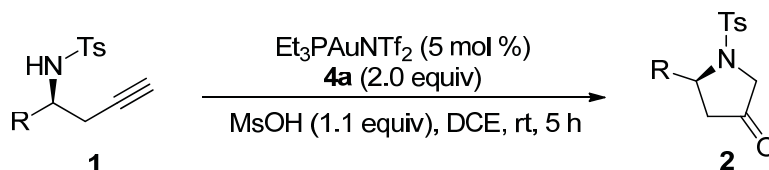

### General procedure:

2-Bromopyridine *N*-oxide **4a** (104.4 mg, 0.60 mmol),  $MsOH$  (3.3 mL, 0.10 M in DCE), and  $Et_3PAuNTf_2$  (9.0 mg, 0.015 mmol) were added in this order to a solution of the homopropargyl amide **1** (0.30 mmol) in DCE (3.0 mL) at room temperature. The reaction mixture was stirred at rt and the progress of the reaction was monitored by TLC. The reaction typically took 5 h. Upon completion, the reaction diluted with DCM (30 mL) and washed with saturated aqueous  $NaHCO_3$  ( $2 \times 15$  mL). The resulting solution was extracted again with DCM (30 mL) and the combined organic layers were dried with  $MgSO_4$ . The mixture was then concentrated and the residue was purified by chromatography on silica gel (eluent: hexanes/ethyl acetate) to afford the desired products **2**.

### (*R*)-5-heptyl-1-tosylpyrrolidin-3-one (**2a**)

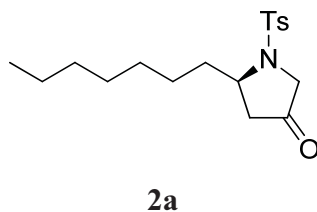

Compound **2a** was prepared in 69% yield according to the general procedure.  $[\alpha]_D^{20} = +88.0^\circ$  ( $c = 0.35$ ,  $CHCl_3$ ). 99% ee (determined by HPLC: Chiralcel AD-H Column, 10/90

*i*PrOH /hexane, 1.0 mL/min, 200 nm; TR = 9.70 min (major), 13.77 min (minor)). <sup>1</sup>H NMR (500 MHz, CDCl<sub>3</sub>) δ 7.72 (d, 2H, *J* = 8.5 Hz), 7.33 (d, 2H, *J* = 8.0 Hz), 4.24 – 4.18 (m, 1H), 3.79 (d, 1H, *J* = 18.5 Hz), 3.63 (d, 1H, *J* = 19.0 Hz), 2.43 (s, 3H), 2.23 (dd, 1H, *J* = 8.0 Hz, *J* = 18.0 Hz), 2.11 (dd, 1H, *J* = 1.0 Hz, *J* = 18.0 Hz), 1.72 – 1.65 (m, 1H), 1.53 – 1.46 (m, 1H), 1.37 – 1.26 (m, 10H), 0.88 (t, 3H, *J* = 6.5 Hz); <sup>13</sup>C NMR (125 MHz, CDCl<sub>3</sub>) δ 210.1, 144.1, 135.1, 130.1, 127.3, 57.8, 52.9, 42.5, 35.7, 31.7, 29.2, 29.1, 25.4, 22.6, 21.5, 14.0; IR (neat): 2925, 2855, 1761(s), 1597, 1493, 1461, 1349, 1305, 1156, 1092, 1016, 664; MS (ESI, *m/z*): 360 (*M* + Na<sup>+</sup>). HRESIMS Calcd for [C<sub>18</sub>H<sub>27</sub>NNaO<sub>3</sub>S]<sup>+</sup> (*M* + Na<sup>+</sup>) 360.1609; Found 360.1611.

**(S)-5-heptyl-1-tosylpyrrolidin-3-one (2a')**

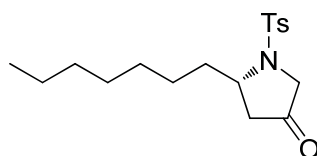

**2a'**

Compound **2a'** was prepared in 63% yield according to the general procedure.  $[\alpha]_{\text{D}}^{20} = -58.0^{\circ}$  (*c* = 0.5, CHCl<sub>3</sub>). 99% ee (determined by HPLC: Chiralcel AD-H Column, 10/90 *i*PrOH /hexane, 1.0 mL/min, 200 nm; TR = 15.91 min (major), 12.09 min (minor)).

**(S)-5-cyclohexyl-1-tosylpyrrolidin-3-one (2b)**

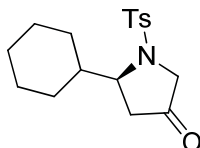

**2b**

Compound **2b** was prepared in 52% yield according to the general procedure.  $[\alpha]_{\text{D}}^{20} = +82.2^{\circ}$  (*c* = 1.0, CHCl<sub>3</sub>). 99% ee (determined by HPLC: Chiralcel AS-H Column, 10/90 *i*PrOH /hexane, 1.0 mL/min, 200 nm; TR = 39.90 min (major), 30.27 min (minor)). <sup>1</sup>H

NMR (500 MHz,  $\text{CDCl}_3$ )  $\delta$  7.72 (d, 2H,  $J = 8.5$  Hz), 7.33 (d, 2H,  $J = 8.5$  Hz), 4.10 – 4.06 (m, 1H), 3.79 (d, 1H,  $J = 19.0$  Hz), 3.59 (d, 1H,  $J = 19.0$  Hz), 2.43 (s, 3H), 2.22 (d, 1H,  $J = 8.0$  Hz), 2.03 (dd, 1H,  $J = 9.5$  Hz,  $J = 18.0$  Hz), 1.80 – 1.73 (m, 3H), 1.67 (d, 1H,  $J = 12.0$  Hz), 1.60 – 1.52 (m, 2H), 1.26 – 1.07 (m, 3H), 1.01 – 0.93 (m, 2H);  $^{13}\text{C}$  NMR (125 MHz,  $\text{CDCl}_3$ )  $\delta$  210.7, 144.1, 135.1, 130.1, 127.2, 62.4, 53.5, 42.7, 39.5, 29.2, 28.2, 26.1, 25.9, 25.7, 21.5; IR (neat): 2926, 1761(s), 1597, 1449, 1348, 1158, 1091, 1025, 815, 663; MS (ESI,  $m/z$ ): 344 ( $\text{M} + \text{Na}^+$ ). HRESIMS Calcd for  $[\text{C}_{17}\text{H}_{23}\text{NNaO}_3\text{S}]^+$  ( $\text{M} + \text{Na}^+$ ) 344.1296; Found 344.1297.

**(R)-5-phenethyl-1-tosylpyrrolidin-3-one (2c)**

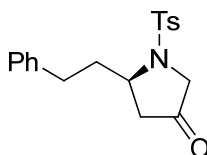

**2c**

Compound **2c** was prepared in 62% yield according to the general procedure.  $[\alpha]_{\text{D}}^{20} = +41.5^\circ$  ( $c = 1.0$ ,  $\text{CHCl}_3$ ). 99% ee (determined by HPLC: Chiralcel AD-H Column, 10/90 *i*PrOH /hexane, 1.0 mL/min, 200 nm; TR = 22.90 min (major), 28.87 min (minor)).  $^1\text{H}$  NMR (500 MHz,  $\text{CDCl}_3$ )  $\delta$  7.67 (d, 2H,  $J = 8.5$  Hz), 7.32 – 7.28 (m, 4H), 7.22 (d, 1H,  $J = 7.5$  Hz), 7.18 (d, 2H,  $J = 7.0$  Hz), 4.21 – 4.16 (m, 1H), 3.74 (dd, 2H,  $J = 19.0$  Hz,  $J = 51.0$  Hz), 2.76 – 2.67 (m, 2H), 2.43 (s, 3H), 2.24 (dd, 1H,  $J = 8.5$  Hz,  $J = 18.0$  Hz), 2.38 – 2.04 (m, 2H), 1.87 – 1.79 (m, 1H);  $^{13}\text{C}$  NMR (125 MHz,  $\text{CDCl}_3$ )  $\delta$  209.6, 144.3, 140.6, 134.6, 130.1, 128.5, 128.3, 127.3, 126.2, 57.3, 53.1, 42.5, 37.3, 31.8, 21.5; IR (neat): 2923, 1760(s), 1597, 1495, 1453, 1347, 1156, 1091, 1030, 663, 587; MS (ESI,  $m/z$ ): 366 ( $\text{M} + \text{Na}^+$ ). HRESIMS Calcd for  $[\text{C}_{19}\text{H}_{21}\text{NNaO}_3\text{S}]^+$  ( $\text{M} + \text{Na}^+$ ) 366.1140; Found 366.1138.

**(R)-5-(3-azidopropyl)-1-tosylpyrrolidin-3-one (2d)**

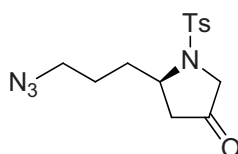

**2d**

Compound **2d** was prepared in 67% yield according to the general procedure.  $[\alpha]_{\text{D}}^{20} = +66.0^\circ$  ( $c = 1.0$ ,  $\text{CHCl}_3$ ). 99% ee (determined by HPLC: Chiralcel IB Column, 10/90 *i*PrOH /hexane, 0.8 mL/min, 200 nm; TR = 22.99 min (major), 24.83 min (minor)).  $^1\text{H}$  NMR(400 MHz,  $\text{CDCl}_3$ )  $\delta$  7.72 (d, 2H,  $J = 8.3$  Hz), 7.35 (d, 2H,  $J = 8.2$  Hz), 4.28 – 4.21 (m, 1H), 3.80 (d, 1H,  $J = 18.8$  Hz), 3.65 (d, 1H,  $J = 18.8$  Hz), 3.67 (t, 2H,  $J = 6.0$  Hz), 2.44 (s, 3H), 3.80 (dd, 1H,  $J = 18.0$  Hz,  $J = 8.4$  Hz), 2.10 – 2.05 (m, 1H), 1.78 – 1.63 (m, 4H);  $^{13}\text{C}$  NMR (100 MHz,  $\text{CDCl}_3$ )  $\delta$  209.6, 144.5, 134.7, 130.2, 127.3, 57.2, 52.8, 50.8, 42.5, 32.7, 25.1, 21.5; IR (neat): 2923, 2853, 2094, 1759(s), 1597, 1452, 1345, 1154, 1091, 772; MS (ESI,  $m/z$ ): 345 ( $\text{M} + \text{Na}^+$ ). HRESIMS Calcd for  $[\text{C}_{14}\text{H}_{18}\text{N}_4\text{NaO}_3\text{S}]^+$  ( $\text{M} + \text{Na}^+$ ) 345.0997; Found 345.0997.

**(R)-2-(3-(4-oxo-1-tosylpyrrolidin-2-yl)propyl)isoindoline-1,3-dione (2e)**

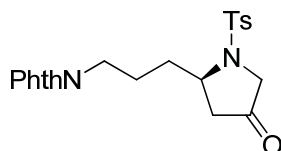

**2e**

Compound **2e** was prepared in 70% yield according to the general procedure.  $[\alpha]_{\text{D}}^{20} = -41.0^\circ$  ( $c = 0.5$ ,  $\text{CHCl}_3$ ). 99% ee (determined by HPLC: Chiralcel OD-H Column, 15/85 *i*PrOH /hexane, 1.0 mL/min, 200 nm; TR = 49.16 min (major), 60.63 min (minor)).  $^1\text{H}$  NMR (400 MHz,  $\text{CDCl}_3$ )  $\delta$  7.86 – 7.83 (m, 2H), 7.74 – 7.72 (m, 4H), 7.33 (d, 2H,  $J = 8.0$  Hz), 4.32 – 4.30 (m, 1H), 3.83 – 3.62 (m, 4H), 2.43 (s, 3H), 2.16 (dd, 1H,  $J = 20.0$  Hz,  $J = 8.0$  Hz), 2.04 (d, 1H,  $J = 8.0$  Hz), 1.87 – 1.80 (m, 2H), 1.74 – 1.64 (m, 1H), 1.56 – 1.47 (m, 1H);  $^{13}\text{C}$  NMR (100 MHz,  $\text{CDCl}_3$ )  $\delta$  209.9, 168.4, 144.3, 134.9, 134.0, 132.1, 130.2, 127.3, 123.3, 57.1, 52.8, 42.4, 37.1, 32.7, 24.8, 21.5; IR (neat): 2923, 1759(s), 1709(s),

1594, 1442, 1260, 1219, 1019, 772; MS (ESI,  $m/z$ ): 449 ( $M + Na^+$ ). HRESIMS Calcd for  $[C_{22}H_{22}N_2NaO_5S]^+$  ( $M + Na^+$ ) 449.1147; Found 449.1149.

**(R)-5-(3-(benzyloxy)propyl)-1-tosylpyrrolidin-3-one (2f)**

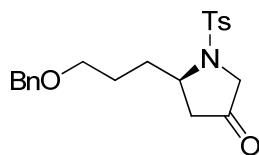

**2f**

Compound **2f** was prepared in 60% yield according to the general procedure.  $[\alpha]_D^{20} = +65.0^\circ$  ( $c = 1.0$ ,  $CHCl_3$ ). 99% ee (determined by HPLC: Chiralcel AD-H Column, 10/90 *i*PrOH /hexane, 0.8 mL/min, 200 nm; TR = 30.79 min (major), 40.09 min (minor)).  $^1H$  NMR (400 MHz,  $CDCl_3$ )  $\delta$  7.69 (d, 2H,  $J = 8.0$  Hz), 7.37 – 7.26 (m, 7H), 4.49 (s, 2H), 4.26 – 4.20 (m, 1H), 3.77 (d, 1H,  $J = 18.8$  Hz), 3.63 (d, 1H,  $J = 18.8$  Hz), 3.56 – 3.47 (m, 2H), 2.42 (s, 3H), 2.21 – 2.06 (m, 2H), 1.81 – 1.60 (m, 4H);  $^{13}C$  NMR (100 MHz,  $CDCl_3$ )  $\delta$  210.1, 144.2, 138.4, 134.9, 130.1, 128.4, 127.7, 127.6, 127.3, 72.9, 69.5, 57.6, 52.9, 42.5, 32.5, 25.9, 21.5; IR (neat): 2979, 2888, 1759(s), 1656, 1597, 1461, 1381, 1260, 1155, 1074, 764, 749; MS (ESI,  $m/z$ ): 410 ( $M + Na^+$ ). HRESIMS Calcd for  $[C_{21}H_{25}NNaO_4S]^+$  ( $M + Na^+$ ) 410.1402; Found 410.1403.

**(S)-5-phenyl-1-tosylpyrrolidin-3-one (2g)**

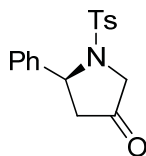

**2g**

Compound **2g** was prepared in 60% yield according to the general procedure.  $[\alpha]_D^{20} = -60.0^\circ$  ( $c = 0.5$ ,  $CHCl_3$ ). 99% ee (determined by HPLC: Chiralpak AD -H Column, 10/90 *i*PrOH /hexane, 1.0 mL/min, 200 nm; TR = 28.85 min (major), 31.48 min (minor)).  $^1H$

NMR (500 MHz, CDCl<sub>3</sub>)  $\delta$  7.53 (d, 2H,  $J$  = 8.5 Hz), 7.31 – 7.26 (m, 3H), 7.23 – 7.19 (m, 4H), 5.29 (dd, 1H,  $J$  = 3.5 Hz,  $J$  = 9.0 Hz), 3.95 (d, 1H,  $J$  = 18.5 Hz), 3.76 (d, 1H,  $J$  = 18.5 Hz), 2.80 (dd, 1H,  $J$  = 9.0 Hz,  $J$  = 18.5 Hz), 2.56 (dd, 1H,  $J$  = 3.5 Hz,  $J$  = 18.5 Hz), 2.40 (s, 3H); <sup>13</sup>C NMR (125 MHz, CDCl<sub>3</sub>)  $\delta$  208.7, 144.0, 139.9, 134.8, 129.8, 128.8, 128.1, 127.3, 126.3, 60.3, 53.5, 45.7, 23.5; IR (neat): 2921, 1761(s), 1596, 1494, 1450, 1347, 1154, 1090, 660, 587; MS (ESI,  $m/z$ ): 338 (M + Na<sup>+</sup>). HRESIMS Calcd for [C<sub>17</sub>H<sub>17</sub>NNaO<sub>3</sub>S]<sup>+</sup> (M + Na<sup>+</sup>) 338.0837; Found 338.0835.

**(S)-5-(naphthalen-1-yl)-1-tosylpyrrolidin-3-one (2h)**

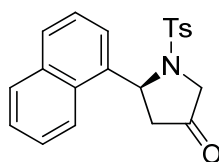

**2h**

Compound **2h** was prepared in 63% yield according to the general procedure.  $[\alpha]_{\text{D}}^{20}$  = -59.5° ( $c$  = 0.5, CHCl<sub>3</sub>). 99% ee (determined by HPLC: Chiralcel AD-H Column, 10/90 *i*PrOH /hexane, 1.0 mL/min, 200 nm; TR = 26.10 min (major), 32.21 min (minor)). <sup>1</sup>H NMR (400 MHz, CDCl<sub>3</sub>)  $\delta$  7.88 – 7.85 (m, 2H), 7.77 (d, 1H,  $J$  = 7.2 Hz), 7.64 (d, 2H,  $J$  = 8.0 Hz), 7.56 – 7.49 (m, 2H), 7.39 – 7.32 (m, 2H), 7.25 (d, 2H,  $J$  = 5.6 Hz), 6.08 (dd, 1H,  $J$  = 2.8 Hz,  $J$  = 9.6 Hz), 4.04 (dd, 2H,  $J$  = 18.8 Hz,  $J$  = 61.6 Hz), 3.00 (dd, 1H,  $J$  = 9.6 Hz,  $J$  = 18.0 Hz), 2.60 (d, 1H,  $J$  = 20.4 Hz), 2.41 (s, 3H); <sup>13</sup>C NMR (100 MHz, CDCl<sub>3</sub>)  $\delta$  208.7, 144.2, 135.7, 134.9, 134.1, 129.9, 129.6, 129.2, 128.7, 127.4, 126.5, 125.9, 125.2, 123.3, 122.7, 58.1, 53.9, 46.0, 21.5; IR (neat): 2923, 1761(s), 1597, 1442, 1350, 1260, 1156, 1091, 1018, 773; MS (ESI,  $m/z$ ): 388 (M + Na<sup>+</sup>). HRESIMS Calcd for [C<sub>21</sub>H<sub>19</sub>NNaO<sub>3</sub>S]<sup>+</sup> (M + Na<sup>+</sup>) 388.0983; Found 388.0987.

**(S)-5-(4-fluorophenyl)-1-tosylpyrrolidin-3-one (2i)**

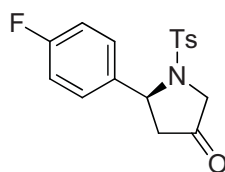

**2i**

Compound **2i** was prepared in 62% yield according to the general procedure.  $[\alpha]_{\text{D}}^{20} = -82.5^\circ$  ( $c = 0.5$ ,  $\text{CHCl}_3$ ). 99% ee (determined by HPLC: Chiralpak AD -H Column, 10/90 *i*PrOH /hexane, 0.8 mL/min, 200 nm; TR = 41.96 min (major), 37.86 min (minor)).  $^1\text{H}$  NMR (400 MHz,  $\text{CDCl}_3$ )  $\delta$  7.54 (d, 2H,  $J = 8.0$  Hz), 7.25 (d, 2H,  $J = 8.8$  Hz), 7.19 (dd, 2H,  $J = 1.2$  Hz,  $J = 8.8$  Hz), 6.98 (t, 2H,  $J = 8.4$  Hz), 5.24 (dd, 1H,  $J = 3.6$  Hz,  $J = 9.2$  Hz), 3.93 (d, 1H,  $J = 18.4$  Hz), 3.76 (d, 1H,  $J = 18.4$  Hz), 2.80 (dd, 1H,  $J = 9.2$  Hz,  $J = 18.4$  Hz), 2.53 (dd, 1H,  $J = 3.6$  Hz,  $J = 18.4$  Hz), 2.42 (m, 3H);  $^{13}\text{C}$  NMR (125 MHz,  $\text{CDCl}_3$ )  $\delta$  208.2, 162.5 (d,  $J = 245.9$  Hz), 144.2, 135.8 (d,  $J = 3.4$  Hz), 134.8, 129.8, 128.1 (d,  $J = 8.3$  Hz), 127.3, 115.7 (d,  $J = 21.6$  Hz), 59.7, 53.6, 45.8, 21.5; IR (neat): 2959, 2922, 1760(s), 1598, 1510, 1347, 1152, 814, 663; MS (ESI,  $m/z$ ): 356 ( $\text{M} + \text{Na}^+$ ). HRESIMS Calcd for  $[\text{C}_{17}\text{H}_{16}\text{FNNaO}_3\text{S}]^+$  ( $\text{M} + \text{Na}^+$ ) 356.0733; Found 356.0736.

**(S)-5-(4-chlorophenyl)-1-tosylpyrrolidin-3-one (2j)**

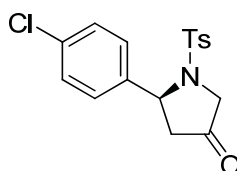

**2j**

Compound **2j** was prepared in 61% yield according to the general procedure.  $[\alpha]_{\text{D}}^{20} = -87.5^\circ$  ( $c = 0.5$ ,  $\text{CHCl}_3$ ). 99% ee (determined by HPLC: Chiralpak AD-H Column, 10/90 *i*PrOH /hexane, 1.0 mL/min, 200 nm; TR = 42.27 min (major), 37.45 min (minor)).  $^1\text{H}$  NMR (500 MHz,  $\text{CDCl}_3$ )  $\delta$  7.54 (d, 2H,  $J = 8.0$  Hz), 7.25 (d, 4H,  $J = 8.5$  Hz), 7.15 (d, 2H,  $J = 8.0$  Hz), 5.21 (dd, 1H,  $J = 4.0$  Hz,  $J = 9.5$  Hz), 3.93 (d, 1H,  $J = 18.5$  Hz), 3.78 (d, 1H,  $J = 18.0$  Hz), 2.80 (dd, 1H,  $J = 9.0$  Hz,  $J = 18.5$  Hz), 2.51 (dd, 1H,  $J = 4.0$  Hz,  $J = 18.5$  Hz), 2.40 (s, 3H);  $^{13}\text{C}$  NMR (125 MHz,  $\text{CDCl}_3$ )  $\delta$  208.0, 144.3, 138.5, 134.6, 134.1,

129.9, 128.9, 127.8, 127.3, 59.7, 53.6, 45.7, 21.5; IR (neat): 2920, 1761(s), 1597, 1491, 1346, 1184, 1152, 1089, 1004, 812, 661; MS (ESI, m/z): 372 (M + Na<sup>+</sup>). HRESIMS Calcd for [C<sub>17</sub>H<sub>16</sub>ClNNaO<sub>3</sub>S]<sup>+</sup> (M + Na<sup>+</sup>) 372.0437; Found 372.0437.

**(S)-5-(4-bromophenyl)-1-tosylpyrrolidin-3-one (2k)**

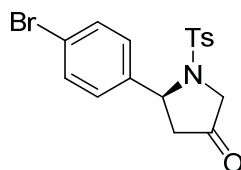

**2k**

Compound **2k** was prepared in 57% yield according to the general procedure.  $[\alpha]_{\text{D}}^{20} = -82.2^{\circ}$  (c = 0.5, CHCl<sub>3</sub>). 99% ee (determined by HPLC: Chiralpak AD -H Column, 10/90 *i*PrOH /hexane, 1.0 mL/min, 200 nm; TR = 47.13 min (major), 42.81 min (minor)). <sup>1</sup>H NMR (500 MHz, CDCl<sub>3</sub>) δ 7.54 (d, 2H, *J* = 8.5 Hz), 7.41 (d, 2H, *J* = 8.5 Hz), 7.25 (d, 2H, *J* = 8.0 Hz), 7.09 (d, 2H, *J* = 8.5 Hz), 5.20 (dd, 1H, *J* = 4.0 Hz, *J* = 9.0 Hz), 3.93 (d, 1H, *J* = 18.0 Hz), 3.78 (d, 1H, *J* = 18.0 Hz), 2.81 (dd, 1H, *J* = 8.0 Hz, *J* = 18.0 Hz), 2.51 (dd, 1H, *J* = 4.0 Hz, *J* = 18.0 Hz), 2.43 (s, 3H); <sup>13</sup>C NMR (125 MHz, CDCl<sub>3</sub>) δ 207.9, 144.3, 139.0, 134.6, 131.9, 129.9, 128.1, 127.4, 122.4, 59.8, 53.6, 45.7, 21.5; IR (neat): 2923, 2854, 1763(s), 1595, 1488, 1336, 1158, 1092, 1010, 812, 662; MS (ESI, m/z): 416 (M + Na<sup>+</sup>). HRESIMS Calcd for [C<sub>17</sub>H<sub>16</sub>BrNNaO<sub>3</sub>S]<sup>+</sup> (M + Na<sup>+</sup>) 415.9932; Found 415.9938.

**(S)-5-(2-bromophenyl)-1-tosylpyrrolidin-3-one (2l)**

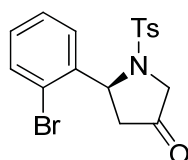

**2l**

Compound **2l** was prepared in 63% yield according to the general procedure.  $[\alpha]_{\text{D}}^{20} = -106.0^{\circ}$  (c = 0.2, CHCl<sub>3</sub>). 98% ee (determined by HPLC: Chiralcel AD-H Column, 10/90



*i*PrOH /hexane, 1.0 mL/min, 200 nm; TR = 22.49 min (major), 21.57 min (minor)). <sup>1</sup>H NMR (500 MHz, CDCl<sub>3</sub>) δ 7.68 (d, 2H, *J* = 8.5 Hz), 7.54 (dd, 1H, *J* = 1.0 Hz, *J* = 8.0 Hz), 7.42 (dd, 1H, *J* = 1.5 Hz, *J* = 8.0 Hz), 7.33 – 7.28 (m, 3H), 7.17 – 7.14 (m, 1H), 5.49 (dd, 1H, *J* = 4.5 Hz, *J* = 9.5 Hz), 3.96 (dd, 2H, *J* = 18.5 Hz, *J* = 36.5 Hz), 2.93 (dd, 1H, *J* = 9.5 Hz, *J* = 18.5 Hz), 2.45 (dd, 1H, *J* = 4.5 Hz, *J* = 18.5 Hz), 2.44 (s, 3H); <sup>13</sup>C NMR (125 MHz, CDCl<sub>3</sub>) δ 207.6, 144.4, 140.1, 133.9, 133.2, 130.0, 129.4, 127.9, 127.8, 127.6, 121.6, 60.3, 54.7, 45.6, 21.5; IR (neat): 2922, 2852, 1760(s), 1596, 1465, 1440, 1349, 1090, 1025, 755, 660, 588; MS (ESI, *m/z*): 416 (*M* + Na<sup>+</sup>). HRESIMS Calcd for [C<sub>17</sub>H<sub>16</sub>BrNNaO<sub>3</sub>S]<sup>+</sup> (*M* + Na<sup>+</sup>) 415.9932; Found 415.9936.

**(S)-5-(*p*-tolyl)-1-tosylpyrrolidin-3-one (2m)**

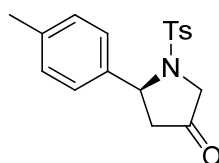

**2m**

Compound **2m** was prepared in 61% yield according to the general procedure.  $[\alpha]_{\text{D}}^{20} = -67.3^{\circ}$  (*c* = 0.5, CHCl<sub>3</sub>). 99% ee (determined by HPLC: Chiralcel AD-H Column, 10/90 *i*PrOH /hexane, 1.0 mL/min, 254 nm; TR = 31.89 min (major), 34.06 min (minor)). <sup>1</sup>H NMR (500 MHz, CDCl<sub>3</sub>) δ 7.54 (d, 2H, *J* = 8.5 Hz), 7.22 (d, 2H, *J* = 8.5 Hz), 7.09 (s, 4H), 5.23 (dd, 1H, *J* = 3.5 Hz, *J* = 9.5 Hz), 3.92 (d, 1H, *J* = 18.0 Hz), 3.75 (d, 1H, *J* = 18.0 Hz), 2.76 (dd, 1H, *J* = 9.5 Hz, *J* = 18.5 Hz), 2.54 (dd, 1H, *J* = 3.5 Hz, *J* = 18.5 Hz), 2.40 (s, 3H), 2.32 (s, 3H); <sup>13</sup>C NMR (125 MHz, CDCl<sub>3</sub>) δ 208.9, 143.9, 137.9, 136.9, 134.8, 129.7, 129.4, 127.4, 126.3, 60.1, 53.5, 45.7, 21.5, 21.0; IR (neat): 2922, 1762(s), 1596, 1514, 1349, 1157, 1091, 1043, 661, 588; MS (ESI, *m/z*): 352 (*M* + Na<sup>+</sup>). HRESIMS Calcd for [C<sub>18</sub>H<sub>19</sub>NNaO<sub>3</sub>S]<sup>+</sup> (*M* + Na<sup>+</sup>) 352.0983; Found 352.0985.

**(S)-5-(4-methoxyphenyl)-1-tosylpyrrolidin-3-one (2n)**

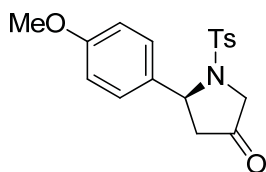

**2n**

Compound **2n** was prepared in 60% yield according to the general procedure.  $[\alpha]_D^{20} = -84.0^\circ$  ( $c = 0.5$ ,  $\text{CHCl}_3$ ). 99% ee (determined by HPLC: Chiralcel AD-H Column, 10/90 *i*PrOH /hexane, 1.0 mL/min, 200 nm; TR = 46.19 min (major), 51.16 min (minor)).  $^1\text{H}$  NMR (500 MHz,  $\text{CDCl}_3$ )  $\delta$  7.53 (d, 2H,  $J = 8.5$  Hz), 7.22 (d, 2H,  $J = 8.0$  Hz), 7.12 (d, 2H,  $J = 8.5$  Hz), 6.80 (d, 2H,  $J = 8.5$  Hz), 5.24 (dd, 1H,  $J = 2.8$  Hz,  $J = 9.5$  Hz), 3.92 (d, 1H,  $J = 18.5$  Hz), 3.79 (s, 3H), 3.74 (d, 1H,  $J = 18.5$  Hz), 2.76 (dd, 1H,  $J = 9.0$  Hz,  $J = 18.5$  Hz), 2.54 (dd, 1H,  $J = 3.5$  Hz,  $J = 18.5$  Hz), 2.40 (s, 3H);  $^{13}\text{C}$  NMR (125 MHz,  $\text{CDCl}_3$ )  $\delta$  208.9, 159.5, 143.9, 134.9, 131.8, 129.7, 127.7, 127.4, 114.2, 59.9, 55.3, 53.5, 45.7, 21.5; IR (neat): 2924, 1761(s), 1612, 1514, 1348, 1247, 1151, 1003, 817, 663; MS (ESI,  $m/z$ ): 368 ( $M + \text{Na}^+$ ). HRESIMS Calcd for  $[\text{C}_{18}\text{H}_{19}\text{NNaO}_4\text{S}]^+$  ( $M + \text{Na}^+$ ) 368.0932; Found 368.0935.

#### 1-tosylpyrrolidin-3-one (2o)

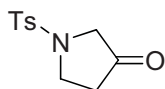

**2o**

Compound **2o** was prepared in 70% yield according to the general procedure. This compound is known and the spectroscopic data match those reported.<sup>3</sup>  $^1\text{H}$  NMR (500 MHz,  $\text{CDCl}_3$ )  $\delta$  7.72 (d, 2H,  $J = 8.5$  Hz), 7.37 (d, 2H,  $J = 8.0$  Hz), 3.55 (t, 2H,  $J = 9.0$  Hz), 3.50 (s, 2H), 2.49 (t, 2H,  $J = 8.0$  Hz), 2.45 (s, 3H);  $^{13}\text{C}$  NMR (125 MHz,  $\text{CDCl}_3$ )  $\delta$  208.2, 144.5, 131.5, 130.0, 127.9, 53.7, 44.9, 37.2, 21.5.

#### 1-tosyl-1-azaspiro[4.4]nonan-3-one (2p)

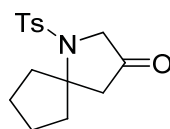

**2p**

Compound **2p** was prepared in 55% yield according to the general procedure.  $^1\text{H}$  NMR (500 MHz,  $\text{CDCl}_3$ )  $\delta$  7.74 (d, 2H,  $J = 8.0$  Hz), 7.31 (d, 2H,  $J = 8.0$  Hz), 3.82 (s, 2H), 2.54 – 2.49 (m, 2H), 2.46 (s, 2H), 2.43 (s, 3H), 1.92 – 1.85 (m, 2H), 1.67 – 1.63 (m, 2H), 1.58 – 1.50 (m, 2H);  $^{13}\text{C}$  NMR (125 MHz,  $\text{CDCl}_3$ )  $\delta$  207.9, 143.7, 137.7, 129.7, 127.2, 72.9, 55.8, 53.0, 36.3, 23.1, 21.5; IR (neat): 2958, 1767(s), 1597, 1496, 1342, 1160, 1090, 821, 663, 590; MS (ESI,  $m/z$ ): 316 ( $M + \text{Na}^+$ ). HRESIMS Calcd for  $[\text{C}_{15}\text{H}_{19}\text{NNaO}_3\text{S}]^+$  ( $M + \text{Na}^+$ ) 316.0983; Found 316.0981.

**(R)-1-((4-bromophenyl)sulfonyl)-5-heptylpyrrolidin-3-one (2q)**

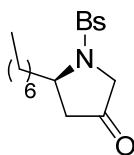

**2q**

Compound **2q** was prepared in 70% yield according to the general procedure.  $[\alpha]_{\text{D}}^{20} = +38.5^\circ$  ( $c = 0.75$ ,  $\text{CHCl}_3$ ). 99% ee (determined by HPLC: Chiralpak ADH Column, 10/90 *i*PrOH /hexane, 0.8 mL/min, 200 nm; TR = 12.29 min (major), 22.13 min (minor)).  $^1\text{H}$  NMR (400 MHz,  $\text{CDCl}_3$ )  $\delta$  7.73 – 7.67 (m, 4H), 4.27 – 4.21 (m, 1H), 3.79 (dd, 2H,  $J = 19.6$  Hz,  $J = 58.4$  Hz), 2.34 (q, 1H,  $J = 8.0$  Hz,  $J = 17.6$  Hz), 2.20 – 2.15 (m, 1H), 1.74 – 1.64 (m, 1H), 1.56 – 1.48 (m, 1H), 1.36 – 1.18 (m, 10H), 0.89 (t, 3H,  $J = 6.8$  Hz);  $^{13}\text{C}$  NMR (100 MHz,  $\text{CDCl}_3$ )  $\delta$  209.3, 137.3, 132.8, 128.7, 128.3, 57.9, 52.7, 42.6, 35.6, 31.7, 29.2, 29.1, 25.4, 22.6, 14.0; IR (neat): 2923, 2853, 1762(s), 1574, 1468, 1352, 1158, 1089, 739, 615; MS (ESI,  $m/z$ ): 424 ( $M + \text{Na}^+$ ). HRESIMS Calcd for  $[\text{C}_{17}\text{H}_{24}\text{BrNNaO}_3\text{S}]^+$  ( $M + \text{Na}^+$ ) 424.0558; Found 424.0556.

**(R)-5-heptyl-1-((2-nitrophenyl)sulfonyl)pyrrolidin-3-one (2r)**

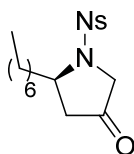

**2r**

Compound **2r** was prepared in 65% yield according to the general procedure.  $[\alpha]_{\text{D}}^{20} = -25.2^\circ$  ( $c = 0.75$ ,  $\text{CHCl}_3$ ). 99% ee (determined by HPLC: Chiralpak ADH Column, 10/90 *i*PrOH /hexane, 0.8 mL/min, 200 nm; TR = 33.77 min (major), 47.45 min (minor)).  $^1\text{H}$  NMR (400 MHz,  $\text{CDCl}_3$ )  $\delta$  8.12 (dd, 1H,  $J = 1.2$  Hz,  $J = 7.6$  Hz), 7.80 – 7.68 (m, 3H), 4.54 – 4.48 (m, 1H), 3.85 (dd, 2H,  $J = 18.0$  Hz,  $J = 56.8$  Hz), 2.76 (q, 1H,  $J = 8.8$  Hz,  $J = 18.0$  Hz), 2.33 (d, 1H,  $J = 18.0$  Hz), 1.75 – 1.67 (m, 1H), 1.58 – 1.50 (m, 1H), 1.35 – 1.19 (m, 10H), 0.89 (t, 3H,  $J = 6.8$  Hz);  $^{13}\text{C}$  NMR (100 MHz,  $\text{CDCl}_3$ )  $\delta$  209.1, 143.9, 134.1, 132.4, 131.8, 131.3, 124.4, 58.5, 52.1, 43.2, 35.6, 31.6, 29.1, 29.0, 25.5, 22.5, 14.0; IR (neat): 2960, 2921, 2851, 1760(s), 1537, 1454, 1358, 1260, 1219, 1019, 597; MS (ESI,  $m/z$ ): 391 ( $\text{M} + \text{Na}^+$ ). HRESIMS Calcd for  $[\text{C}_{17}\text{H}_{24}\text{N}_2\text{NaO}_5\text{S}]^+$  ( $\text{M} + \text{Na}^+$ ) 391.1304; Found 391.1306.

**(R)-5-(9-phenylnonyl)-1-tosylpyrrolidin-3-one (2s)**

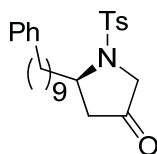

**2s**

Compound **2s** was prepared in 63% yield according to the general procedure.  $[\alpha]_{\text{D}}^{20} = +26.5^\circ$  ( $c = 1.0$ , DCM). 99% ee (determined by HPLC: Chiralcel AD-H Column, 10/90 *i*PrOH /hexane, 1.0 mL/min, 200 nm; TR = 12.59 min (major), 14.61 min (minor)).  $^1\text{H}$  NMR (400 MHz,  $\text{CDCl}_3$ )  $\delta$  7.72 (d, 2H,  $J = 8.2$  Hz), 7.32 (d, 2H,  $J = 8.0$  Hz), 7.29 – 7.25 (m, 2H), 7.19 – 7.14 (m, 3H), 4.24 – 4.17 (m, 1H), 3.79 (d,  $J = 18.8$  Hz, 1H), 3.63 (d, 1H,  $J = 18.8$  Hz), 2.60 (t, 2H,  $J = 7.6$  Hz), 2.43 (s, 3H), 2.20 (dd, 1H,  $J = 18.0$  Hz,  $J = 8.8$  Hz), 2.12 – 2.07 (m, 1H), 1.77 – 1.67 (m, 1H), 1.60 – 1.47 (m, 1H), 1.30 – 1.26 (m, 14H);  $^{13}\text{C}$  NMR (100 MHz,  $\text{CDCl}_3$ )  $\delta$  210.2, 144.1, 142.9, 135.1, 130.1, 128.4, 128.2, 127.3,

125.5, 57.8, 52.9, 42.4, 35.9, 35.7, 31.5, 29.4, 29.2, 29.1, 25.4, 21.5; IR (neat): 3289, 2924, 2853, 1762(s), 1598, 1494, 1452, 1349, 1158, 1092, 772, 587; MS (ESI,  $m/z$ ): 464 ( $M + Na^+$ ). HRESIMS Calcd for  $[C_{26}H_{35}NNaO_3S]^+$  ( $M + Na^+$ ) 464.2235; Found 464.2237.

**(*R*)-2-(9-phenylnonyl)-1-tosylpyrrolidine (**5**)**

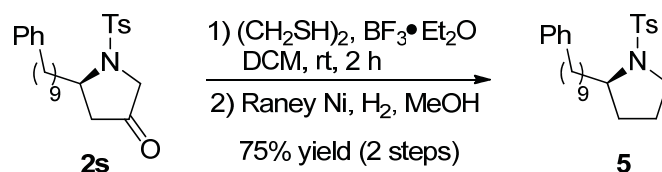

Compound **5** was prepared in 75% yield (2 steps) according to the known procedure.<sup>4-5</sup>  $[\alpha]_D^{20} = -69.5^\circ$  ( $c = 1.0$ ,  $CHCl_3$ ).  $^1H$  NMR (400 MHz,  $CDCl_3$ )  $\delta$  7.71 (d, 2H,  $J = 10$  Hz), 7.31 – 7.26 (m, 4H), 7.18 – 7.17 (m, 3H), 3.62 – 3.55 (m, 1H), 3.40 – 3.34 (m, 1H), 3.22 – 3.16 (m, 1H), 2.62 – 2.58 (m, 2H), 2.42 (s, 3H), 1.83 – 1.73 (m, 2H), 1.63 – 1.53 (m, 4H), 1.50 – 1.43 (m, 2H), 1.30 – 1.28 (m, 12H);  $^{13}C$  NMR (125 MHz,  $CDCl_3$ )  $\delta$  143.0, 142.9, 135.2, 129.5, 128.4, 128.2, 127.5, 125.5, 60.6, 48.8, 36.4, 36.0, 31.5, 30.6, 29.6, 29.5(2), 29.4(9), 29.4(6), 29.3, 26.1, 24.1, 21.5; IR (neat): 2925, 2855, 1598, 1494, 1454, 1346, 1160, 1093, 815, 748, 699, 664, 588; MS (ESI,  $m/z$ ): 450 ( $M + Na^+$ ). HRESIMS Calcd for  $[C_{26}H_{37}NNaO_2S]^+$  ( $M + Na^+$ ) 450.2443; Found 450.2441.

**(*R*)-2-(9-phenylnonyl)pyrrolidine (**5'**)**

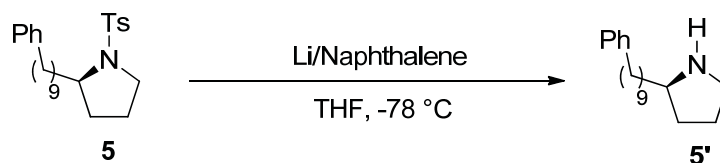

Compound **5'** was prepared in 56% yield according to the known procedure.<sup>2</sup> This compound is known and the spectroscopic data match those reported.<sup>6</sup>  $^1H$  NMR (500 MHz,  $CDCl_3$ )  $\delta$  7.29 – 7.25 (m, 2H), 7.18 – 7.15 (m, 3H), 3.03 – 2.97 (m, 1H), 2.95 – 2.88 (m, 1H), 2.85 – 2.78 (m, 1H), 2.60 (t,  $J = 9.5$  Hz, 2H), 1.90 – 1.67 (m, 4H), 1.65 – 1.57 (m, 2H), 1.46 – 1.12 (m, 14H);  $^{13}C$  NMR (125 MHz,  $CDCl_3$ )  $\delta$  142.9, 128.4, 128.2, 125.5, 59.5, 45.8, 36.0, 35.3, 31.5, 31.4, 29.7, 29.6, 29.5, 29.4, 29.3, 27.3, 24.9.

**(R)-1-methyl-2-(9-phenylnonyl)pyrrolidine (6, (-)-irniine)**

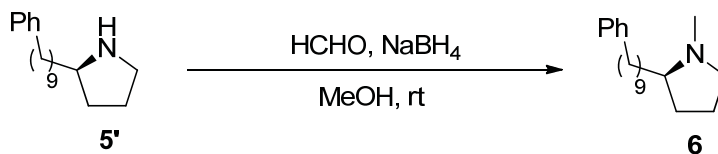

Compound **6** was prepared in 82% yield according to the known procedure.<sup>6</sup> This compound is known and the spectroscopic data match those reported.<sup>6</sup>  $[\alpha]_D^{20} = -108.5$  (c 0.5, MeOH). <sup>1</sup>H NMR (400 MHz, CDCl<sub>3</sub>)  $\delta$  7.29 – 7.25 (m, 2H), 7.20 – 7.15 (m, 3H), 3.07 – 3.02 (m, 1H), 2.60 (t,  $J = 8.4$  Hz, 2H), 2.30 (s, 3H), 2.10 (dd,  $J = 18.0$  Hz,  $J = 9.2$  Hz, 1H), 1.98 – 1.88 (m, 2H), 1.79 – 1.72 (m, 1H), 1.68 – 1.57 (m, 4H), 1.44 – 1.39 (m, 1H), 1.37 – 1.10 (m, 13H); <sup>13</sup>C NMR (100 MHz, CDCl<sub>3</sub>)  $\delta$  142.9, 128.4, 128.2, 125.5, 66.4, 57.4, 40.5, 36.0, 33.9, 31.5, 30.8, 30.0, 29.6, 29.5, 29.4, 29.3, 26.7, 21.8.

**Reference:**

1. Cui, L.; Li, C.; Zhang, L. *Angew. Chem., Int. Ed.* **2010**, *49*, 9178.
2. Shu, C.; Liu, M.-Q.; Wang, S.-S.; Li, L.; Ye, L.-W. *J. Org. Chem.* **2013**, *78*, 3292.
3. Yeom, H.-S.; So, E.; Shin, S. *Chem. Eur. J.* **2011**, *17*, 1764.
4. Cui, L.; Peng, Y.; Zhang, L. *J. Am. Chem. Soc.* **2009**, *131*, 8394.
5. Camps, P.; Gómez, T.; Muñoz-Torrero, D.; Rull, J.; Sánchez, L.; Boschi, F.; Comes-Franchini, M.; Ricci, A.; Calvet, T.; Font-Bardia, M.; De Clercq, E.; Naesens, L. *J. Org. Chem.* **2008**, *73*, 6657.
6. Jossang, A.; Melhaoui, A.; Bodo, B. *Heterocycles*, **1996**, *43*, 755.

Compound 1a

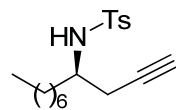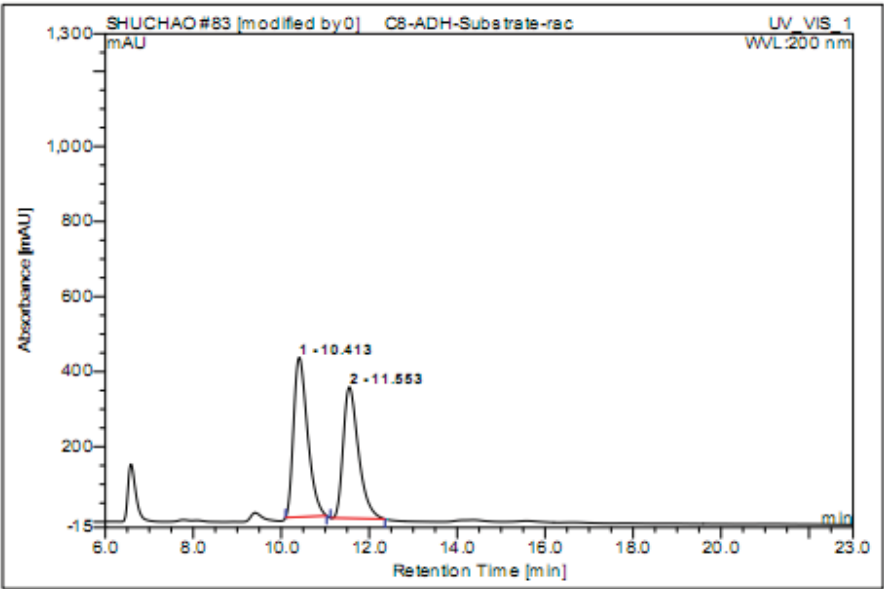

| No.    | Ret.Time<br>min | Peak Name | Height<br>mAU | Area<br>mAU*min | Rel.Area<br>% | Amount | Type |
|--------|-----------------|-----------|---------------|-----------------|---------------|--------|------|
| 1      | 10.41           | n.a.      | 424.845       | 157.217         | 52.70         | n.a.   | BMB* |
| 2      | 11.55           | n.a.      | 349.535       | 141.126         | 47.30         | n.a.   | BMB* |
| Total: |                 |           | 774.380       | 298.343         | 100.00        | 0.000  |      |

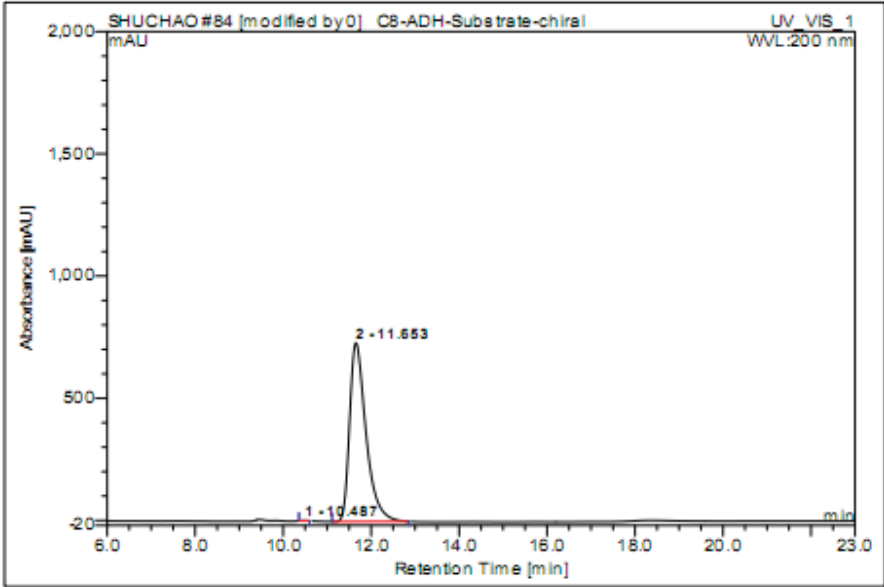

| No.    | Ret.Time<br>min | Peak Name | Height<br>mAU | Area<br>mAU*min | Rel.Area<br>% | Amount | Type |
|--------|-----------------|-----------|---------------|-----------------|---------------|--------|------|
| 1      | 10.49           | n.a.      | 1.185         | 0.182           | 0.06          | n.a.   | BMB* |
| 2      | 11.65           | n.a.      | 731.005       | 316.120         | 99.94         | n.a.   | BMB* |
| Total: |                 |           | 732.191       | 316.303         | 100.00        | 0.000  |      |

Compound 1b

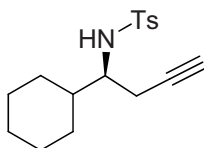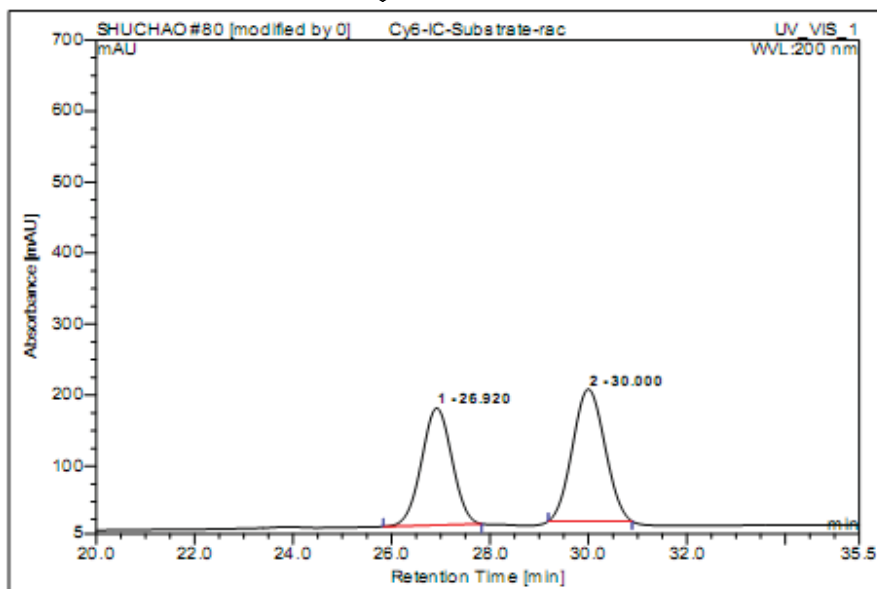

| No.    | Ret.Time<br>min | Peak Name | Height<br>mAU | Area<br>mAU*min | Rel.Area<br>% | Amount | Type |
|--------|-----------------|-----------|---------------|-----------------|---------------|--------|------|
| 1      | 26.92           | n.a.      | 184.792       | 118.323         | 45.55         | n.a.   | BMB* |
| 2      | 30.00           | n.a.      | 185.698       | 141.454         | 54.45         | n.a.   | BMB* |
| Total: |                 |           | 350.490       | 259.776         | 100.00        | 0.000  |      |

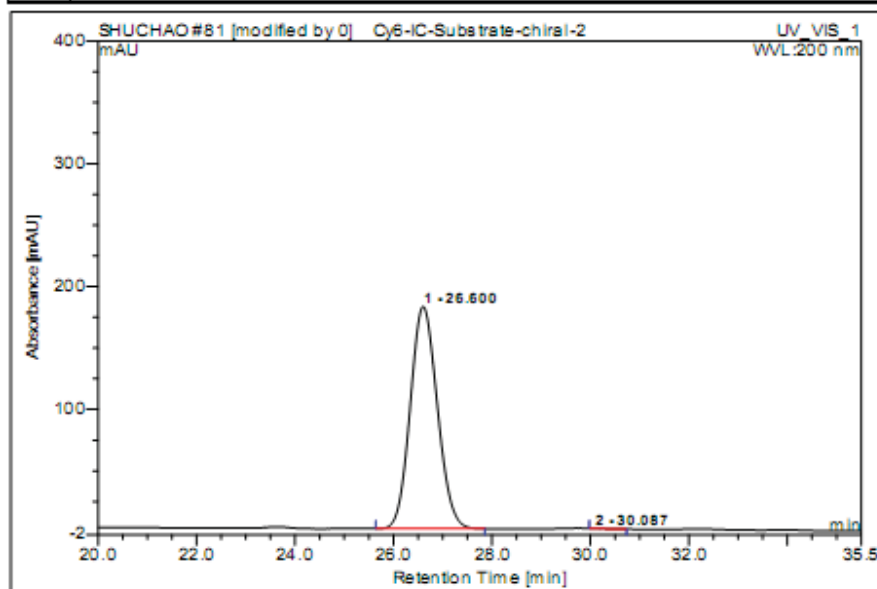

| No.    | Ret.Time<br>min | Peak Name | Height<br>mAU | Area<br>mAU*min | Rel.Area<br>% | Amount | Type |
|--------|-----------------|-----------|---------------|-----------------|---------------|--------|------|
| 1      | 26.60           | n.a.      | 180.872       | 115.290         | 99.99         | n.a.   | BMB  |
| 2      | 30.09           | n.a.      | 0.056         | 0.011           | 0.01          | n.a.   | BMB* |
| Total: |                 |           | 180.928       | 115.301         | 100.00        | 0.000  |      |



Compound 1c

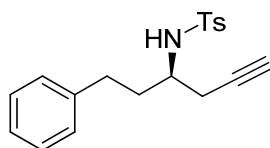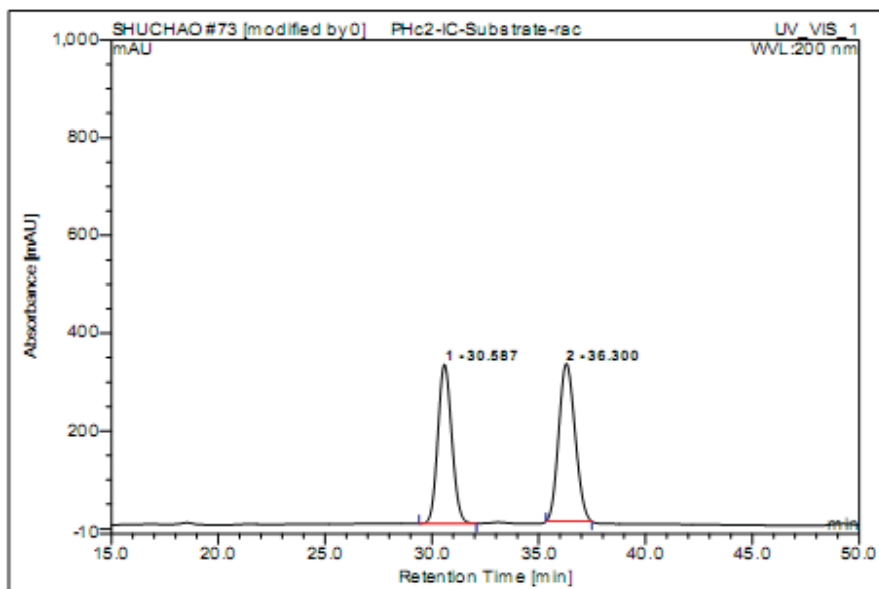

| No.    | Ret.Time<br>min | Peak Name | Height<br>mAU | Area<br>mAU*min | Rel.Area<br>% | Amount | Type |
|--------|-----------------|-----------|---------------|-----------------|---------------|--------|------|
| 1      | 30.59           | n.a.      | 325.175       | 246.009         | 46.22         | n.a.   | BMB  |
| 2      | 36.30           | n.a.      | 322.708       | 286.218         | 53.78         | n.a.   | BMB* |
| Total: |                 |           | 647.883       | 532.226         | 100.00        | 0.000  |      |

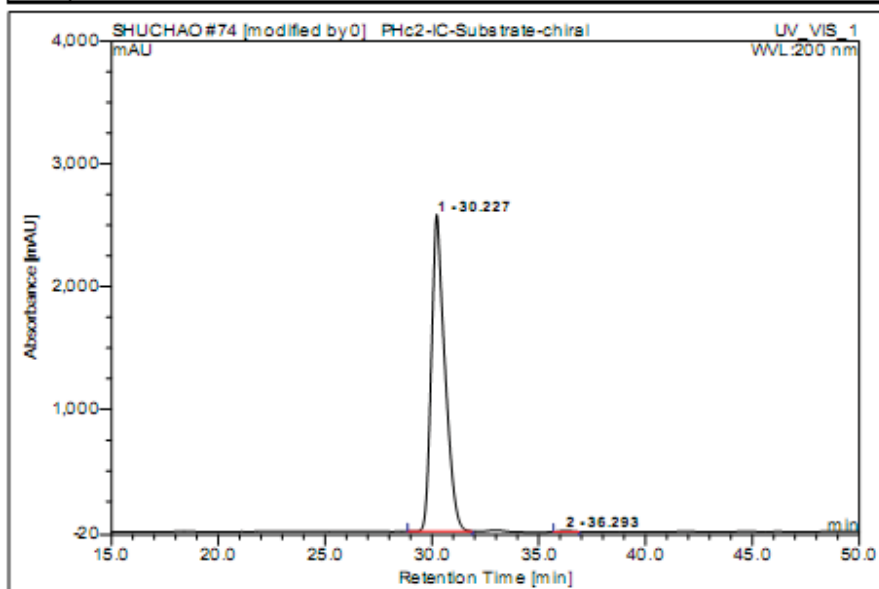

| No.    | Ret.Time<br>min | Peak Name | Height<br>mAU | Area<br>mAU*min | Rel.Area<br>% | Amount | Type |
|--------|-----------------|-----------|---------------|-----------------|---------------|--------|------|
| 1      | 30.23           | n.a.      | 2580.702      | 1890.344        | 99.71         | n.a.   | BMB* |
| 2      | 36.29           | n.a.      | 8.079         | 5.588           | 0.29          | n.a.   | BMB* |
| Total: |                 |           | 2588.781      | 1895.932        | 100.00        | 0.000  |      |

Compound **1d**

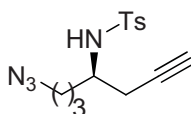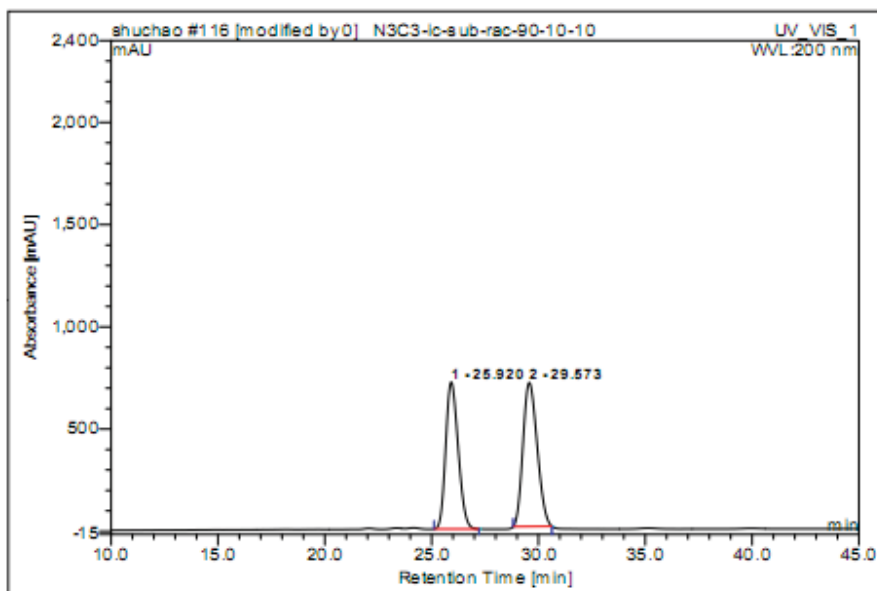

| No.    | Ret.Time<br>min | Peak Name | Height<br>mAU | Area<br>mAU*min | Rel.Area<br>% | Amount | Type |
|--------|-----------------|-----------|---------------|-----------------|---------------|--------|------|
| 1      | 25.92           | n.a.      | 718.230       | 486.336         | 47.30         | n.a.   | BMB* |
| 2      | 29.57           | n.a.      | 703.422       | 541.894         | 52.70         | n.a.   | BMB* |
| Total: |                 |           | 1421.652      | 1028.229        | 100.00        | 0.000  |      |

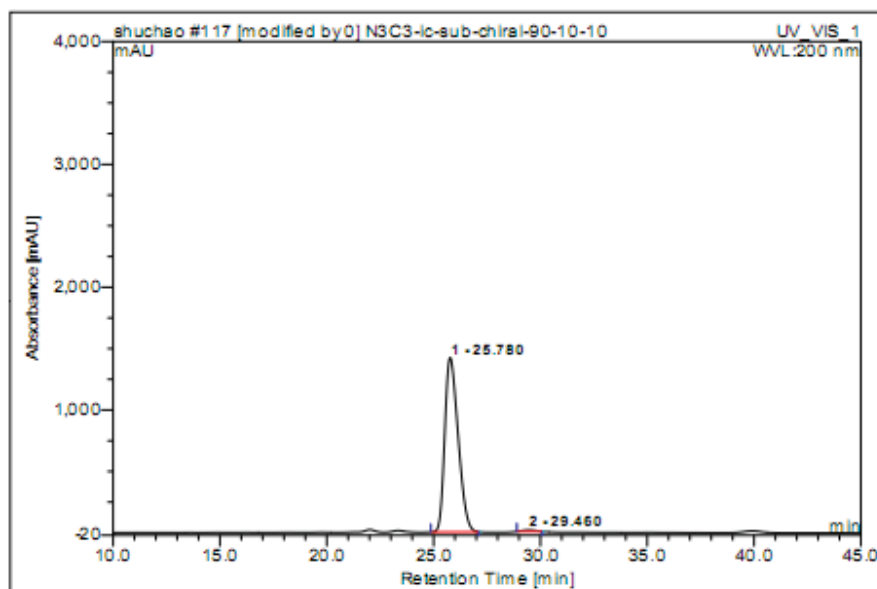

| No.    | Ret.Time<br>min | Peak Name | Height<br>mAU | Area<br>mAU*min | Rel.Area<br>% | Amount | Type |
|--------|-----------------|-----------|---------------|-----------------|---------------|--------|------|
| 1      | 25.78           | n.a.      | 1419.928      | 1030.001        | 99.21         | n.a.   | BMB* |
| 2      | 29.46           | n.a.      | 11.726        | 8.220           | 0.79          | n.a.   | BMB* |
| Total: |                 |           | 1431.655      | 1038.220        | 100.00        | 0.000  |      |

Compound 1e

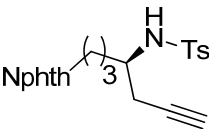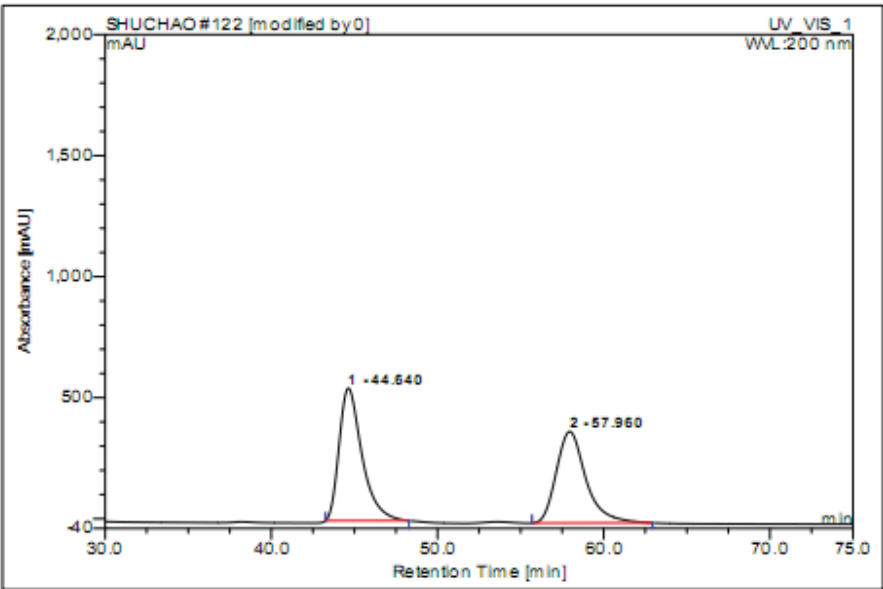

| No.    | Ret.Time<br>min | Peak Name | Height<br>mAU | Area<br>mAU*min | Rel.Area<br>% | Amount | Type |
|--------|-----------------|-----------|---------------|-----------------|---------------|--------|------|
| 1      | 44.64           | n.a.      | 546.855       | 872.830         | 52.79         | n.a.   | BMB* |
| 2      | 57.96           | n.a.      | 377.806       | 780.535         | 47.21         | n.a.   | BMB* |
| Total: |                 |           | 924.661       | 1653.364        | 100.00        | 0.000  |      |

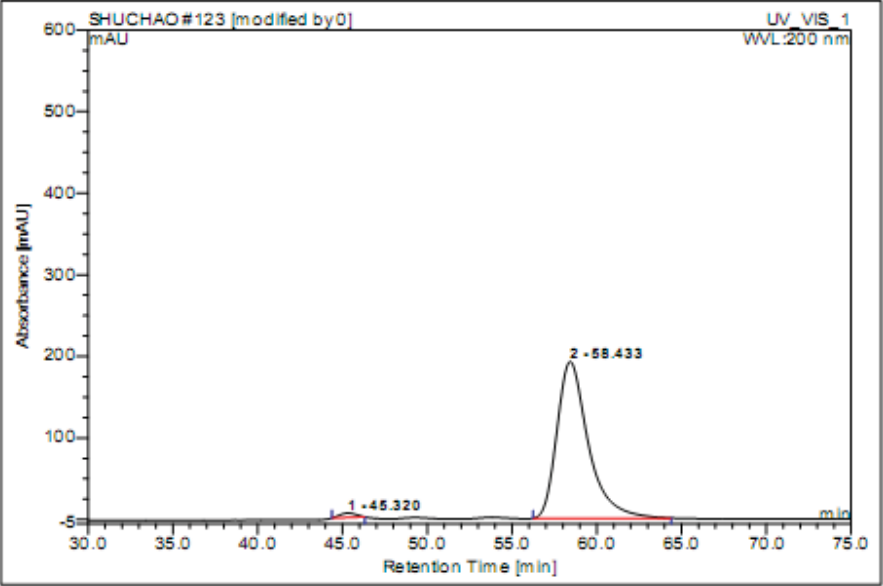

| No.    | Ret.Time<br>min | Peak Name | Height<br>mAU | Area<br>mAU*min | Rel.Area<br>% | Amount | Type |
|--------|-----------------|-----------|---------------|-----------------|---------------|--------|------|
| 1      | 45.32           | n.a.      | 5.386         | 6.000           | 1.43          | n.a.   | BMB* |
| 2      | 58.43           | n.a.      | 191.950       | 412.665         | 98.57         | n.a.   | BMB* |
| Total: |                 |           | 197.336       | 418.665         | 100.00        | 0.000  |      |

Compound 1f

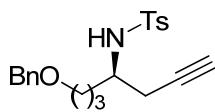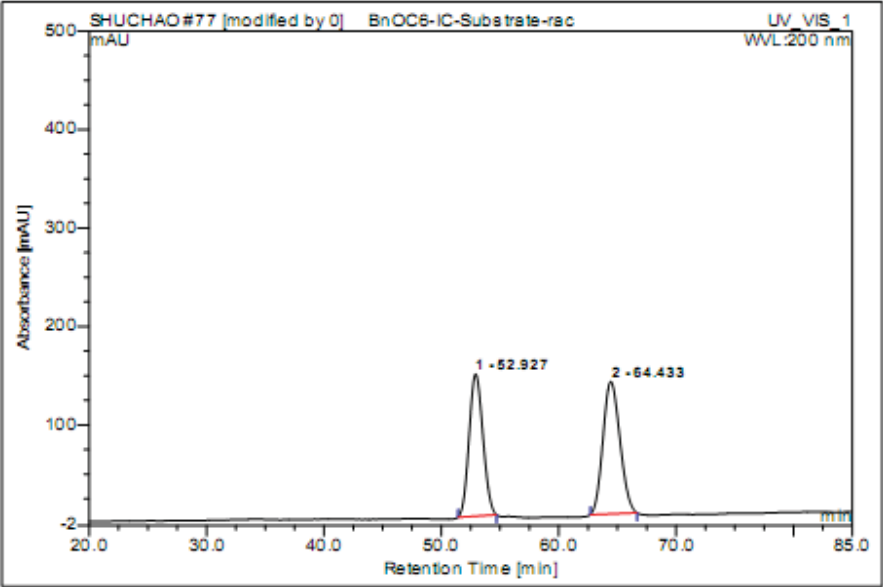

| No.    | Ret.Time<br>min | Peak Name | Height<br>mAU | Area<br>mAU*min | Rel.Area<br>% | Amount | Type |
|--------|-----------------|-----------|---------------|-----------------|---------------|--------|------|
| 1      | 52.93           | n.a.      | 144.283       | 197.139         | 46.69         | n.a.   | BMB* |
| 2      | 64.43           | n.a.      | 134.385       | 225.127         | 53.31         | n.a.   | BMB* |
| Total: |                 |           | 278.668       | 422.267         | 100.00        | 0.000  |      |

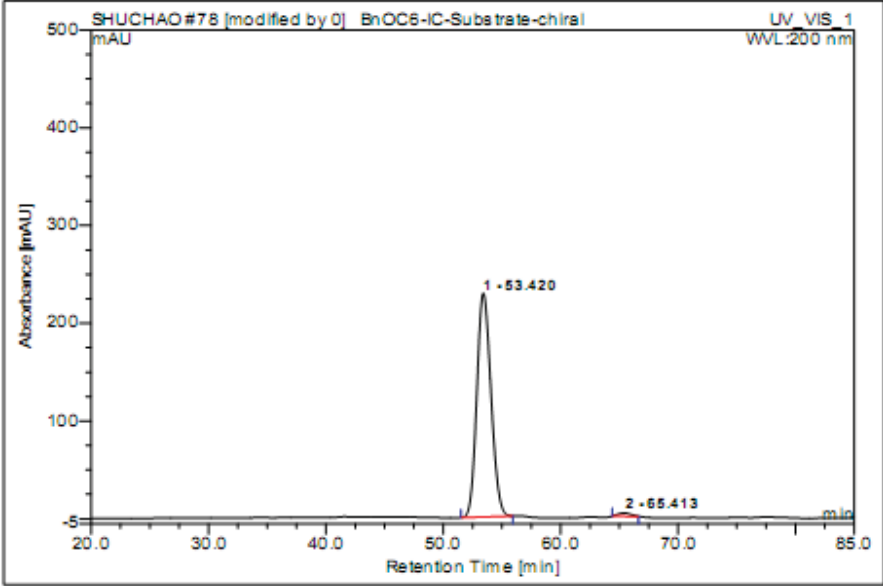

| No.    | Ret.Time<br>min | Peak Name | Height<br>mAU | Area<br>mAU*min | Rel.Area<br>% | Amount | Type |
|--------|-----------------|-----------|---------------|-----------------|---------------|--------|------|
| 1      | 53.42           | n.a.      | 228.878       | 320.089         | 98.76         | n.a.   | BMB* |
| 2      | 65.41           | n.a.      | 3.214         | 4.032           | 1.24          | n.a.   | BMB* |
| Total: |                 |           | 232.092       | 324.121         | 100.00        | 0.000  |      |

Compound 1g

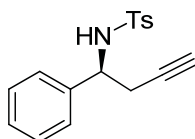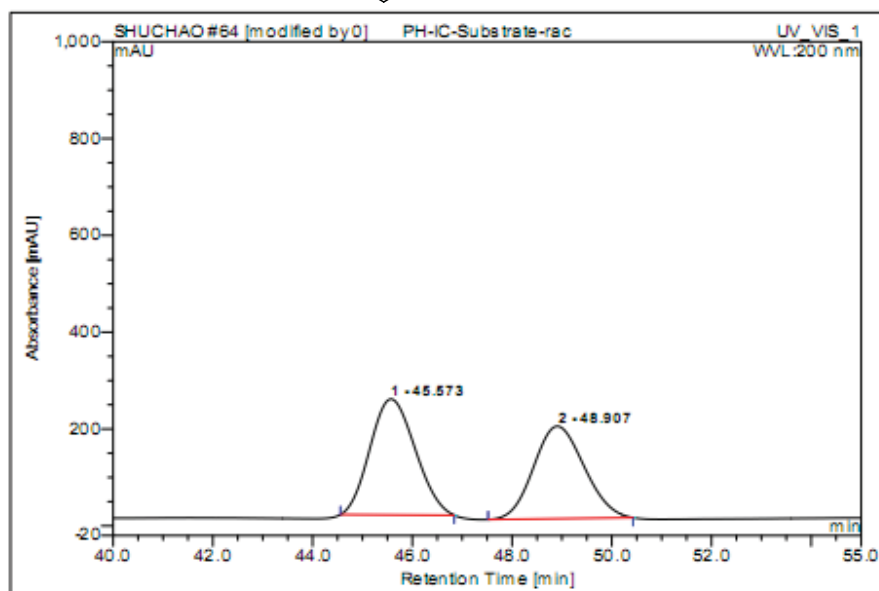

| No.    | Ret.Time<br>min | Peak Name | Height<br>mAU | Area<br>mAU*min | Rel.Area<br>% | Amount | Type |
|--------|-----------------|-----------|---------------|-----------------|---------------|--------|------|
| 1      | 45.57           | n.a.      | 239.076       | 250.838         | 52.86         | n.a.   | BMB* |
| 2      | 48.91           | n.a.      | 190.847       | 223.736         | 47.14         | n.a.   | BMB* |
| Total: |                 |           | 429.922       | 474.574         | 100.00        | 0.000  |      |

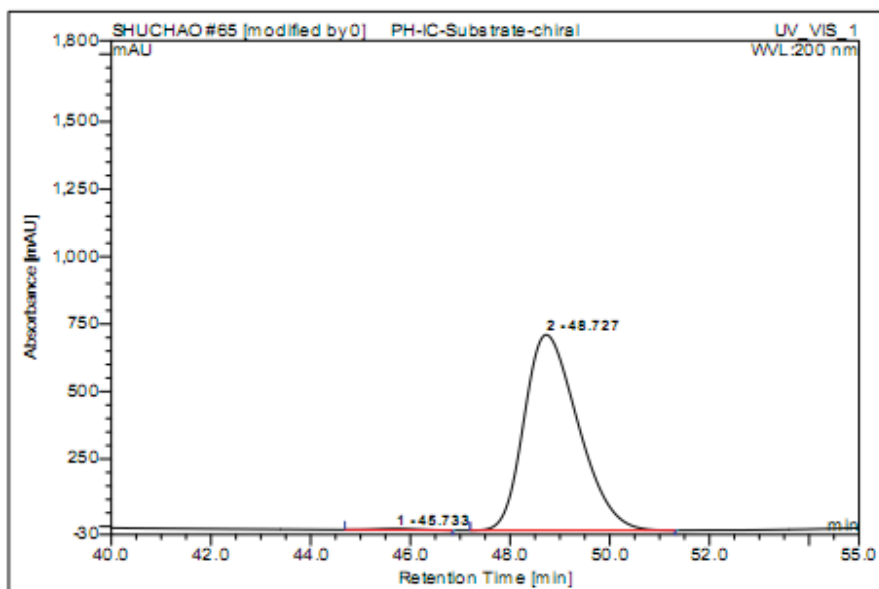

| No.    | Ret.Time<br>min | Peak Name | Height<br>mAU | Area<br>mAU*min | Rel.Area<br>% | Amount | Type |
|--------|-----------------|-----------|---------------|-----------------|---------------|--------|------|
| 1      | 45.73           | n.a.      | 4.704         | 4.799           | 0.52          | n.a.   | BMB  |
| 2      | 48.73           | n.a.      | 724.831       | 909.674         | 99.48         | n.a.   | BMB  |
| Total: |                 |           | 729.535       | 914.472         | 100.00        | 0.000  |      |

Compound 1h

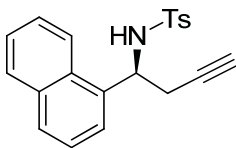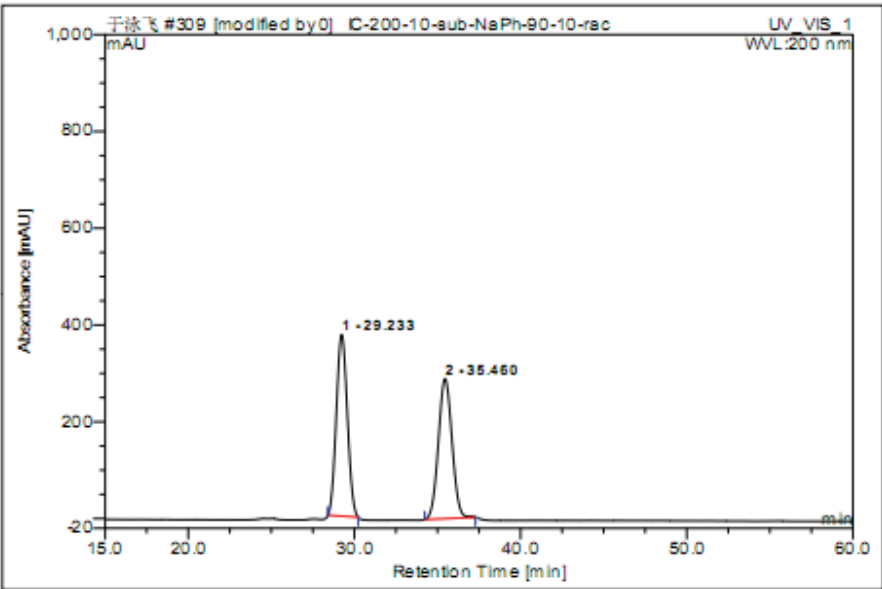

| No.    | Ret.Time<br>min | Peak Name | Height<br>mAU | Area<br>mAU*min | Rel.Area<br>% | Amount | Type |
|--------|-----------------|-----------|---------------|-----------------|---------------|--------|------|
| 1      | 29.23           | n.a.      | 375.032       | 287.481         | 51.10         | n.a.   | BMB* |
| 2      | 35.46           | n.a.      | 289.090       | 275.147         | 48.90         | n.a.   | BMB* |
| Total: |                 |           | 664.122       | 562.628         | 100.00        | 0.000  |      |

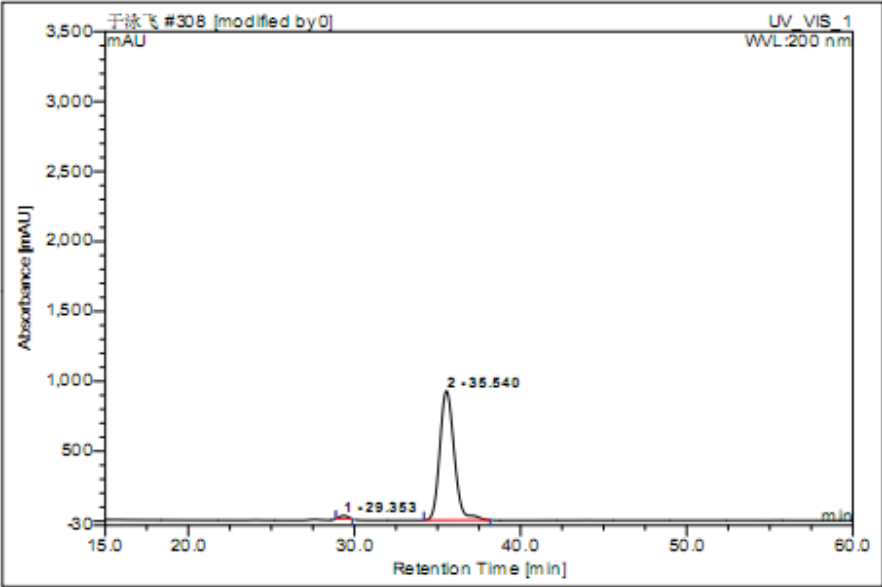

| No.    | Ret.Time<br>min | Peak Name | Height<br>mAU | Area<br>mAU*min | Rel.Area<br>% | Amount | Type |
|--------|-----------------|-----------|---------------|-----------------|---------------|--------|------|
| 1      | 29.35           | n.a.      | 23.096        | 13.207          | 1.39          | n.a.   | BMB* |
| 2      | 35.54           | n.a.      | 924.582       | 934.886         | 98.61         | n.a.   | BMB* |
| Total: |                 |           | 947.677       | 948.093         | 100.00        | 0.000  |      |

Compound 1i

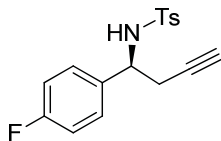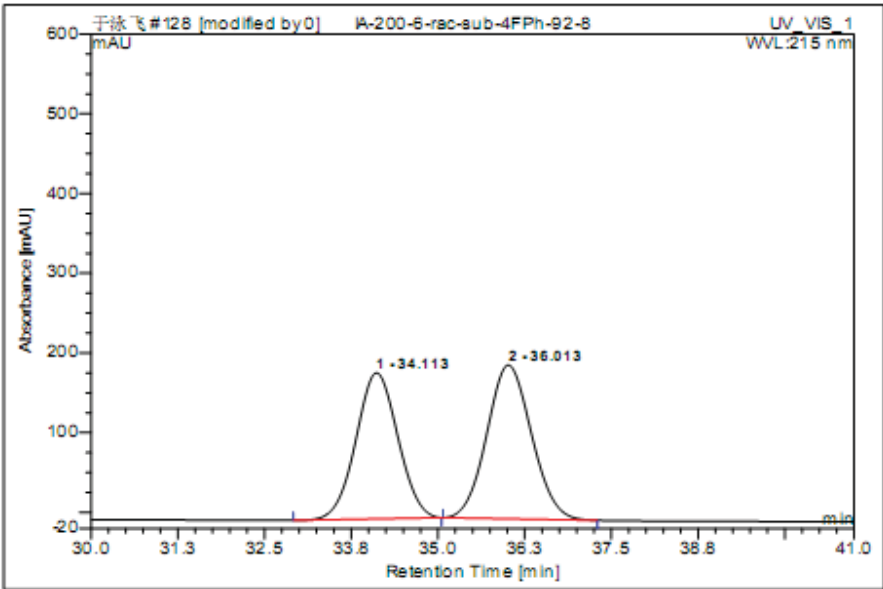

| No.    | Ret.Time<br>min | Peak Name | Height<br>mAU | Area<br>mAU*min | Rel.Area<br>% | Amount<br>n.a. | Type |
|--------|-----------------|-----------|---------------|-----------------|---------------|----------------|------|
| 1      | 34.11           | n.a.      | 183.185       | 128.242         | 47.05         | n.a.           | BMB* |
| 2      | 36.01           | n.a.      | 192.978       | 144.330         | 52.95         | n.a.           | BMB* |
| Total: |                 |           | 376.163       | 272.571         | 100.00        | 0.000          |      |

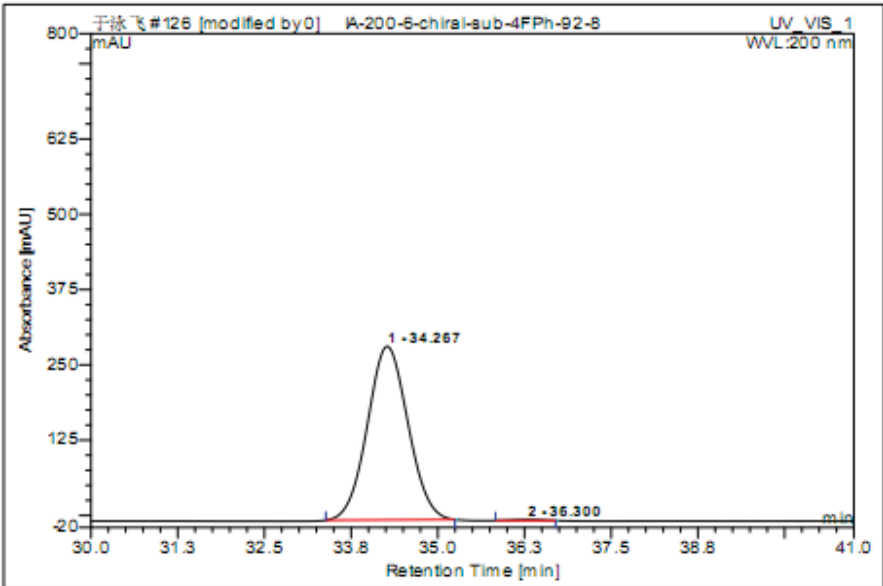

| No.    | Ret.Time<br>min | Peak Name | Height<br>mAU | Area<br>mAU*min | Rel.Area<br>% | Amount<br>n.a. | Type |
|--------|-----------------|-----------|---------------|-----------------|---------------|----------------|------|
| 1      | 34.27           | n.a.      | 287.925       | 195.653         | 99.62         | n.a.           | BMB* |
| 2      | 36.30           | n.a.      | 1.484         | 0.742           | 0.38          | n.a.           | BMB* |
| Total: |                 |           | 289.389       | 196.395         | 100.00        | 0.000          |      |

Compound 1j

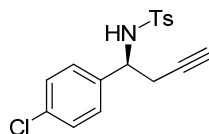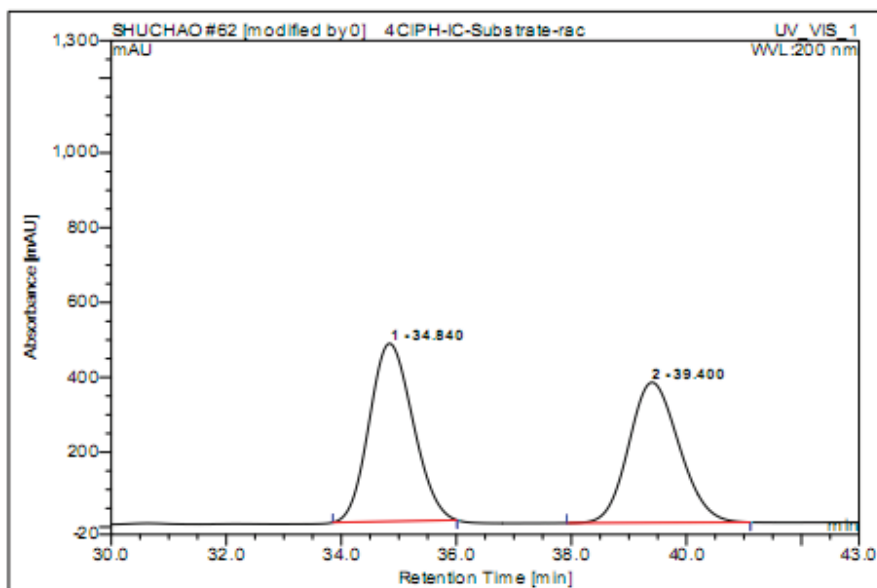

| No.    | Ret.Time<br>min | Peak Name | Height<br>mAU | Area<br>mAU*min | Rel.Area<br>% | Amount | Type |
|--------|-----------------|-----------|---------------|-----------------|---------------|--------|------|
| 1      | 34.84           | n.a.      | 475.313       | 418.405         | 52.38         | n.a.   | BMB* |
| 2      | 39.40           | n.a.      | 374.908       | 380.380         | 47.62         | n.a.   | BMB* |
| Total: |                 |           | 850.221       | 798.785         | 100.00        | 0.000  |      |

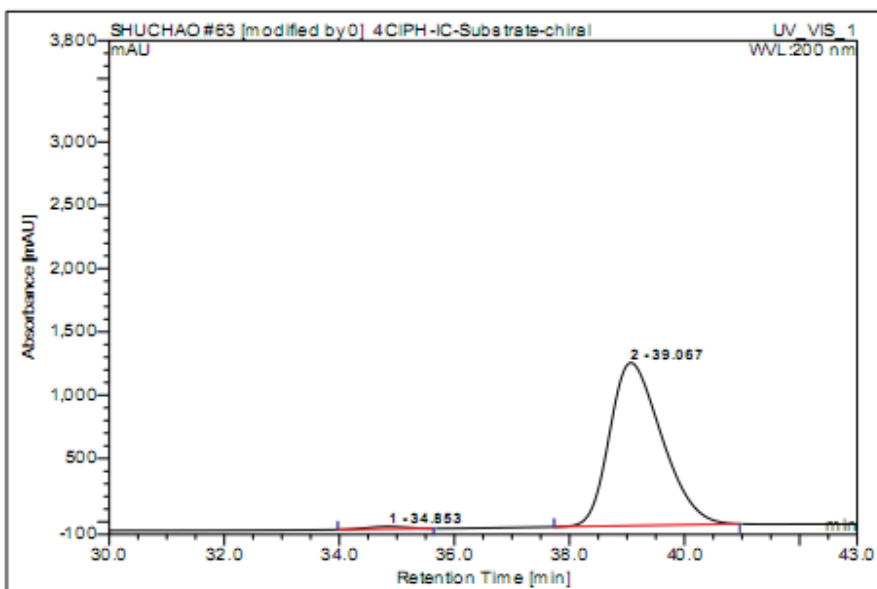

| No.    | Ret.Time<br>min | Peak Name | Height<br>mAU | Area<br>mAU*min | Rel.Area<br>% | Amount | Type |
|--------|-----------------|-----------|---------------|-----------------|---------------|--------|------|
| 1      | 34.85           | n.a.      | 19.594        | 15.884          | 1.16          | n.a.   | BMB* |
| 2      | 39.07           | n.a.      | 1286.020      | 1349.692        | 98.84         | n.a.   | BMB* |
| Total: |                 |           | 1305.613      | 1365.577        | 100.00        | 0.000  |      |



Compound 1k

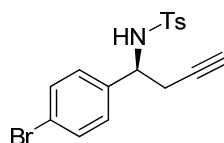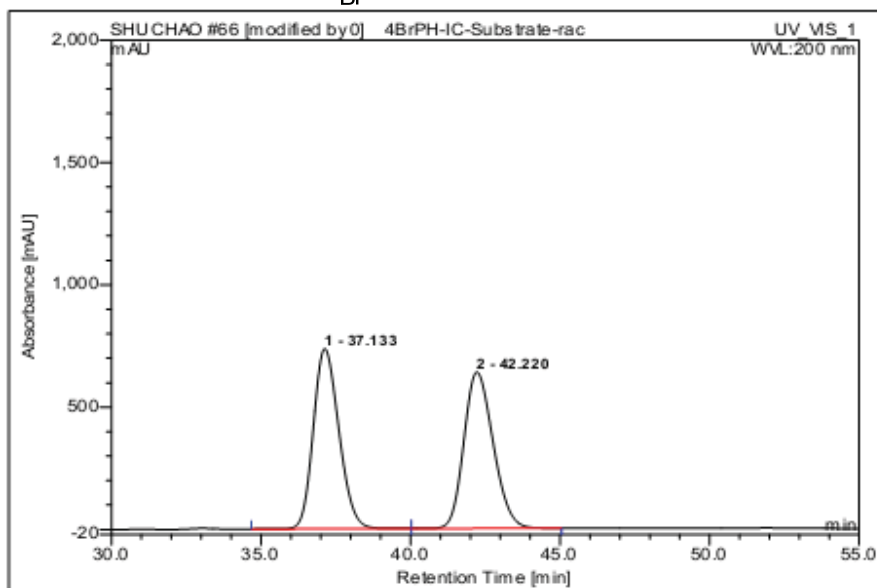

| No.    | Ret.Time<br>min | Peak Name | Height<br>mAU | Area<br>mAU*min | Rel.Area<br>% | Amount | Type |
|--------|-----------------|-----------|---------------|-----------------|---------------|--------|------|
| 1      | 37.13           | n.a.      | 735.787       | 731.979         | 50.18         | n.a.   | BM   |
| 2      | 42.22           | n.a.      | 639.028       | 726.633         | 49.82         | n.a.   | MB   |
| Total: |                 |           | 1374.815      | 1458.612        | 100.00        | 0.000  |      |

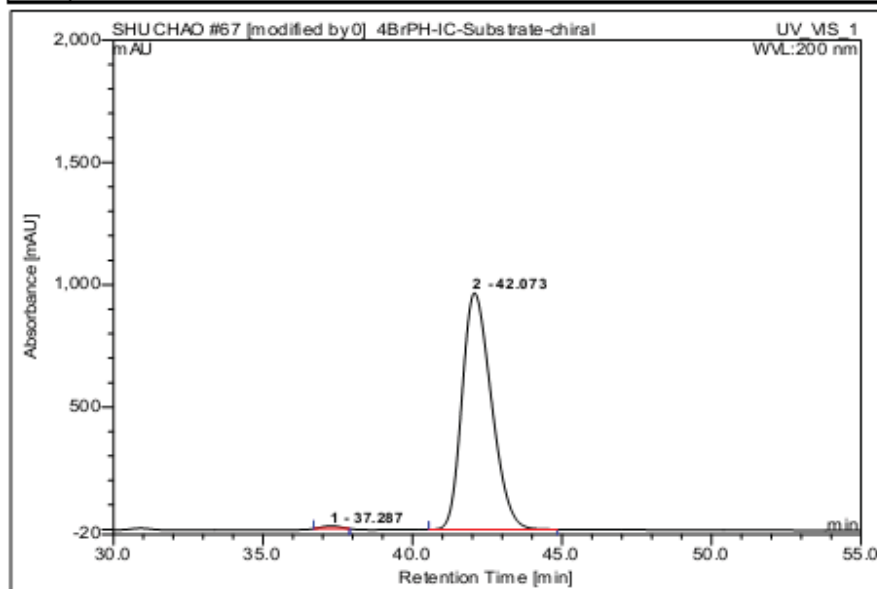

| No.    | Ret.Time<br>min | Peak Name | Height<br>mAU | Area<br>mAU*min | Rel.Area<br>% | Amount | Type |
|--------|-----------------|-----------|---------------|-----------------|---------------|--------|------|
| 1      | 37.29           | n.a.      | 11.397        | 7.959           | 0.72          | n.a.   | BMB* |
| 2      | 42.07           | n.a.      | 966.658       | 1102.836        | 99.28         | n.a.   | BMB  |
| Total: |                 |           | 978.055       | 1110.795        | 100.00        | 0.000  |      |

Compound 11

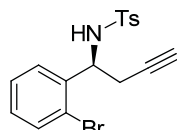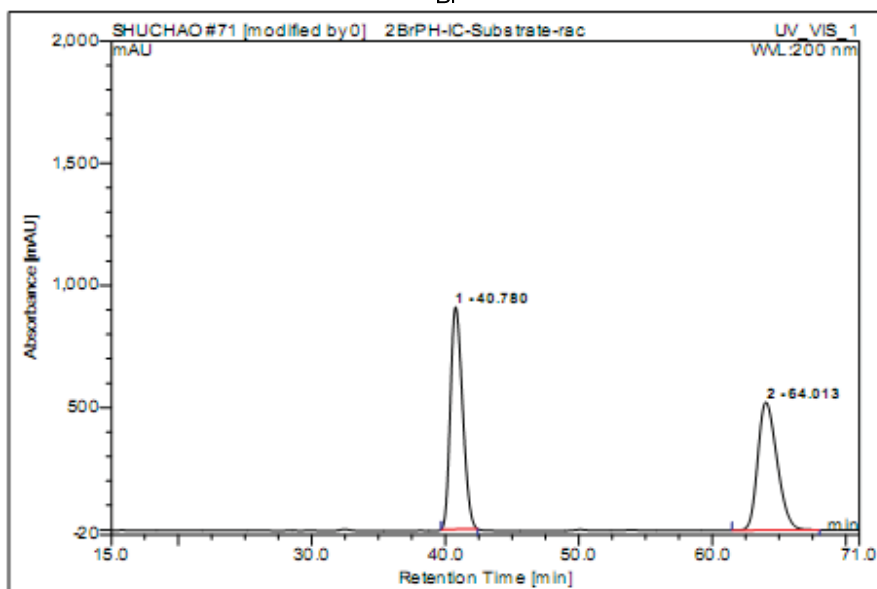

| No.    | Ret.Time<br>min | Peak Name | Height<br>mAU | Area<br>mAU*min | Rel.Area<br>% | Amount | Type |
|--------|-----------------|-----------|---------------|-----------------|---------------|--------|------|
| 1      | 40.78           | n.a.      | 908.888       | 961.248         | 52.35         | n.a.   | BMB* |
| 2      | 64.01           | n.a.      | 522.931       | 875.033         | 47.65         | n.a.   | BMB* |
| Total: |                 |           | 1431.819      | 1836.281        | 100.00        | 0.000  |      |

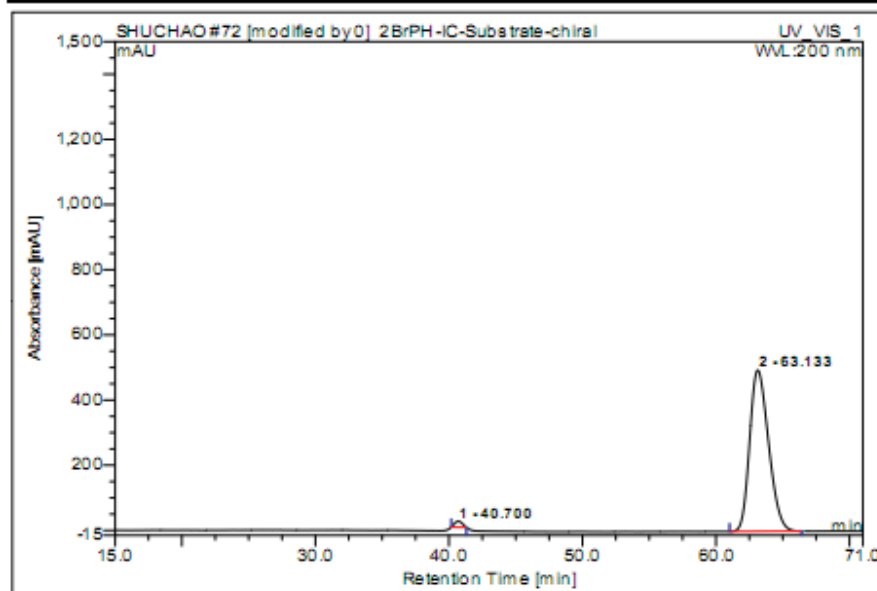

| No.    | Ret.Time<br>min | Peak Name | Height<br>mAU | Area<br>mAU*min | Rel.Area<br>% | Amount | Type |
|--------|-----------------|-----------|---------------|-----------------|---------------|--------|------|
| 1      | 40.70           | n.a.      | 18.392        | 12.551          | 1.52          | n.a.   | MB*  |
| 2      | 63.13           | n.a.      | 494.947       | 812.937         | 98.48         | n.a.   | BMB  |
| Total: |                 |           | 513.339       | 825.488         | 100.00        | 0.000  |      |

Compound **1m**

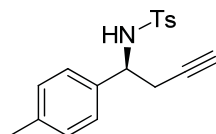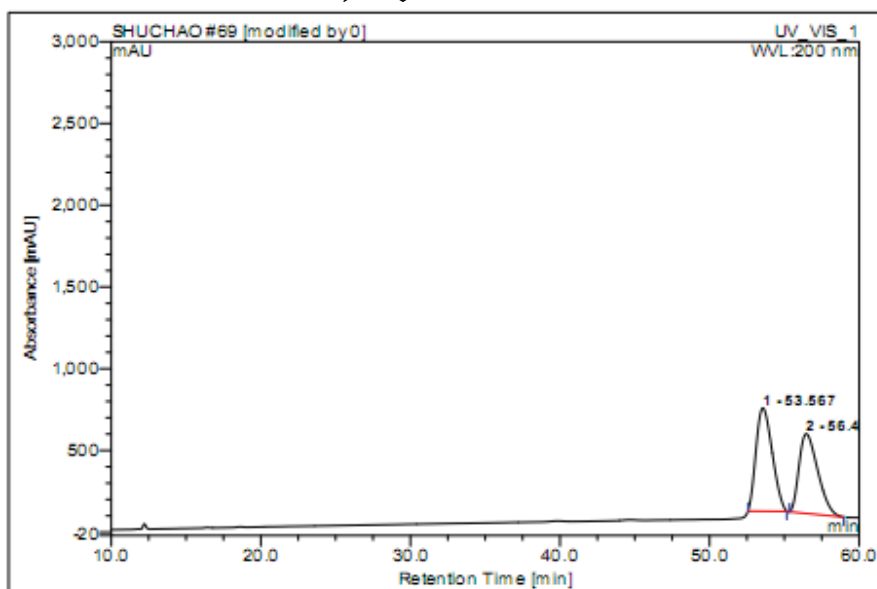

| No.    | Ret.Time<br>min | Peak Name | Height<br>mAU | Area<br>mAU*min | Rel.Area<br>% | Amount | Type |
|--------|-----------------|-----------|---------------|-----------------|---------------|--------|------|
| 1      | 53.57           | n.a.      | 630.836       | 791.909         | 52.85         | n.a.   | BMB* |
| 2      | 56.47           | n.a.      | 486.975       | 708.548         | 47.15         | n.a.   | BMB* |
| Total: |                 |           | 1117.811      | 1498.457        | 100.00        | 0.000  |      |

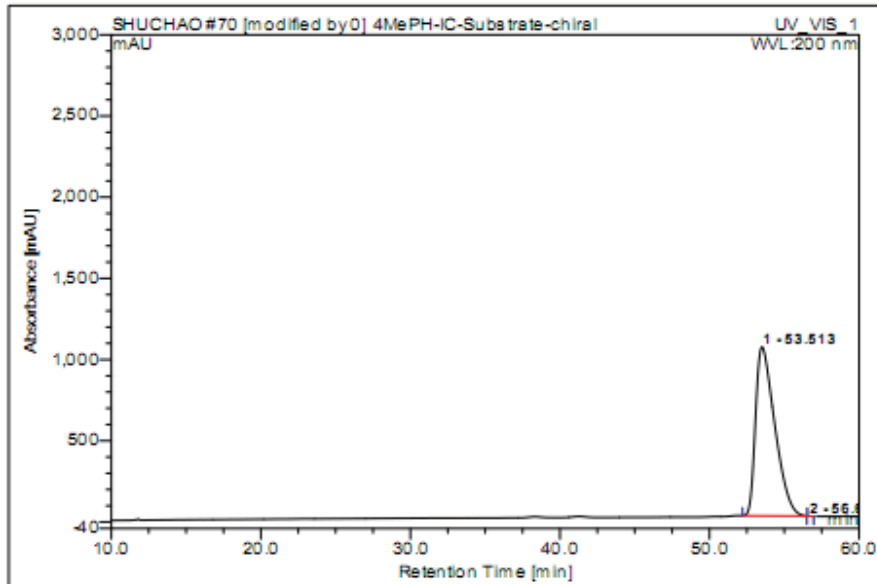

| No.    | Ret.Time<br>min | Peak Name | Height<br>mAU | Area<br>mAU*min | Rel.Area<br>% | Amount | Type |
|--------|-----------------|-----------|---------------|-----------------|---------------|--------|------|
| 1      | 53.51           | n.a.      | 1039.315      | 1546.986        | 99.99         | n.a.   | BMB* |
| 2      | 56.69           | n.a.      | 0.348         | 0.093           | 0.01          | n.a.   | BMB* |
| Total: |                 |           | 1039.663      | 1547.079        | 100.00        | 0.000  |      |

Compound **1n**

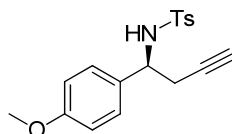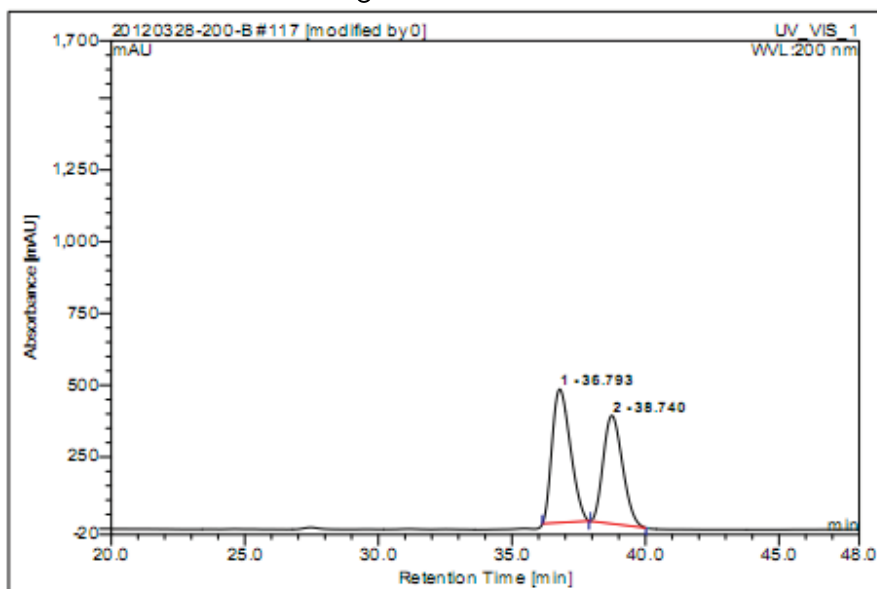

| No.    | Ret.Time<br>min | Peak Name | Height<br>mAU | Area<br>mAU*min | Rel.Area<br>% | Amount | Type |
|--------|-----------------|-----------|---------------|-----------------|---------------|--------|------|
| 1      | 36.79           | n.a.      | 464.802       | 370.267         | 53.95         | n.a.   | BMB* |
| 2      | 38.74           | n.a.      | 376.878       | 316.071         | 46.05         | n.a.   | BMB* |
| Total: |                 |           | 841.680       | 686.338         | 100.00        | 0.000  |      |

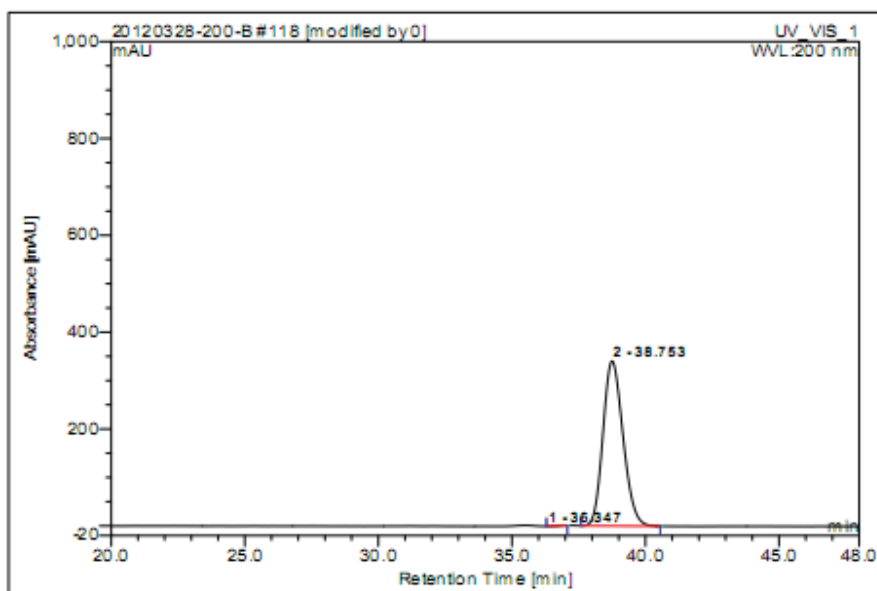

| No.    | Ret.Time<br>min | Peak Name | Height<br>mAU | Area<br>mAU*min | Rel.Area<br>% | Amount | Type |
|--------|-----------------|-----------|---------------|-----------------|---------------|--------|------|
| 1      | 36.35           | n.a.      | 0.135         | 0.138           | 0.05          | n.a.   | BMB* |
| 2      | 38.75           | n.a.      | 340.451       | 296.537         | 99.95         | n.a.   | BMB  |
| Total: |                 |           | 340.586       | 296.675         | 100.00        | 0.000  |      |

Compound 1q

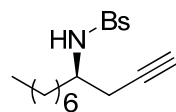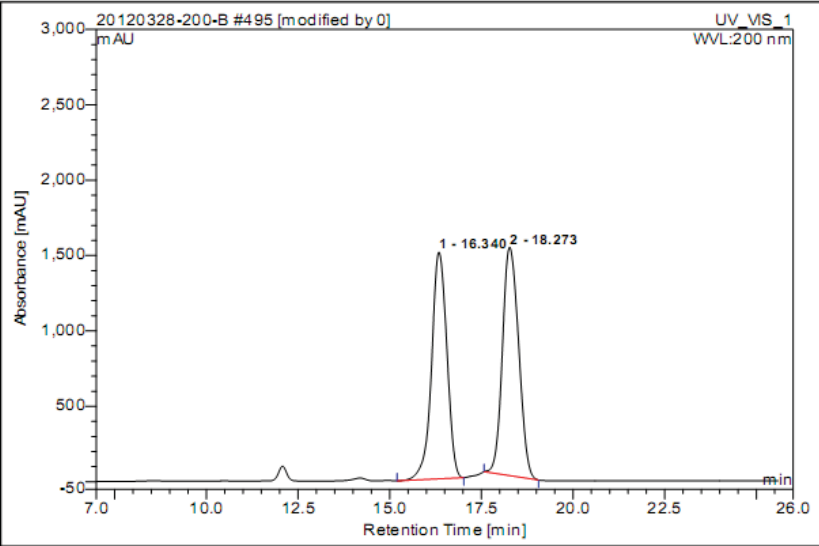

| No.    | Ret.Time<br>min | Peak Name | Height<br>mAU | Area<br>mAU*min | Rel.Area<br>% | Amount | Type |
|--------|-----------------|-----------|---------------|-----------------|---------------|--------|------|
| 1      | 16.34           | n.a.      | 1503.509      | 727.333         | 48.38         | n.a.   | BMB* |
| 2      | 18.27           | n.a.      | 1514.804      | 776.137         | 51.62         | n.a.   | BMB* |
| Total: |                 |           | 3018.313      | 1503.470        | 100.00        | 0.000  |      |

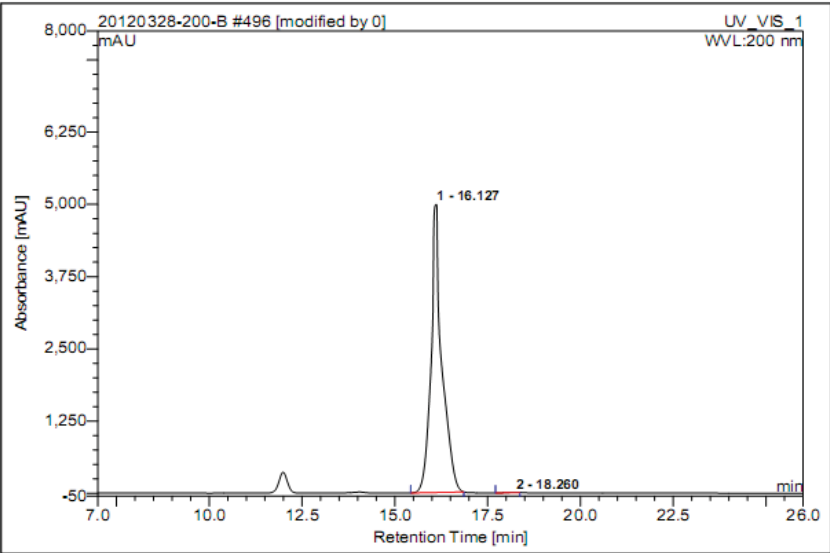

| No.    | Ret.Time<br>min | Peak Name | Height<br>mAU | Area<br>mAU*min | Rel.Area<br>% | Amount | Type |
|--------|-----------------|-----------|---------------|-----------------|---------------|--------|------|
| 1      | 16.13           | n.a.      | 4985.633      | 1693.797        | 99.94         | n.a.   | BMB* |
| 2      | 18.26           | n.a.      | 3.764         | 0.955           | 0.06          | n.a.   | BMB* |
| Total: |                 |           | 4989.397      | 1694.752        | 100.00        | 0.000  |      |

Compound **1r**

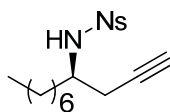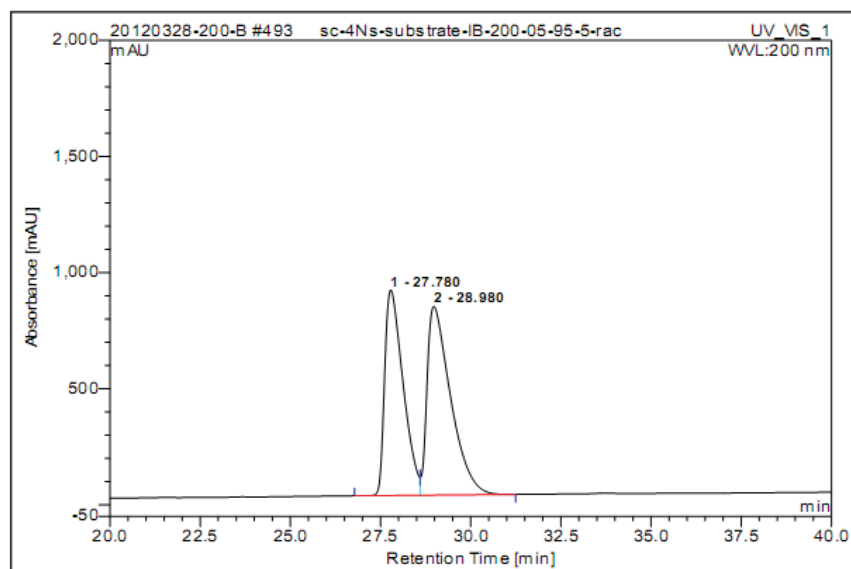

| No.    | Ret.Time<br>min | Peak Name | Height<br>mAU | Area<br>mAU*min | Rel.Area<br>% | Amount | Type |
|--------|-----------------|-----------|---------------|-----------------|---------------|--------|------|
| 1      | 27.78           | n.a.      | 885.136       | 523.838         | 45.97         | n.a.   | BM   |
| 2      | 28.98           | n.a.      | 812.926       | 615.716         | 54.03         | n.a.   | MB   |
| Total: |                 |           | 1698.062      | 1139.554        | 100.00        | 0.000  |      |

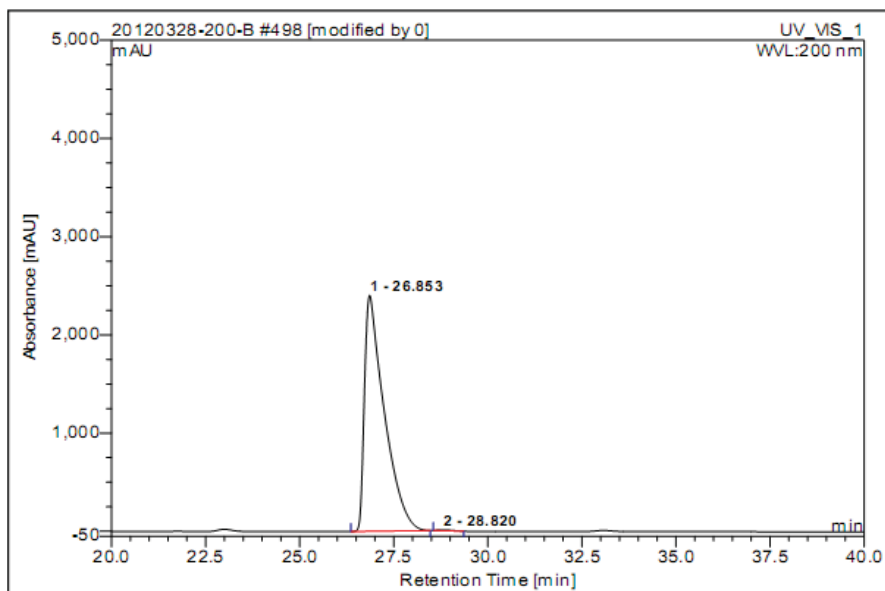

| No.    | Ret.Time<br>min | Peak Name | Height<br>mAU | Area<br>mAU*min | Rel.Area<br>% | Amount | Type |
|--------|-----------------|-----------|---------------|-----------------|---------------|--------|------|
| 1      | 26.85           | n.a.      | 2402.239      | 1468.068        | 99.77         | n.a.   | BMB  |
| 2      | 28.82           | n.a.      | 7.031         | 3.446           | 0.23          | n.a.   | BMB* |
| Total: |                 |           | 2409.269      | 1471.514        | 100.00        | 0.000  |      |

Compound 1s

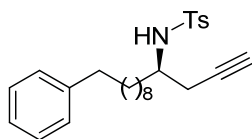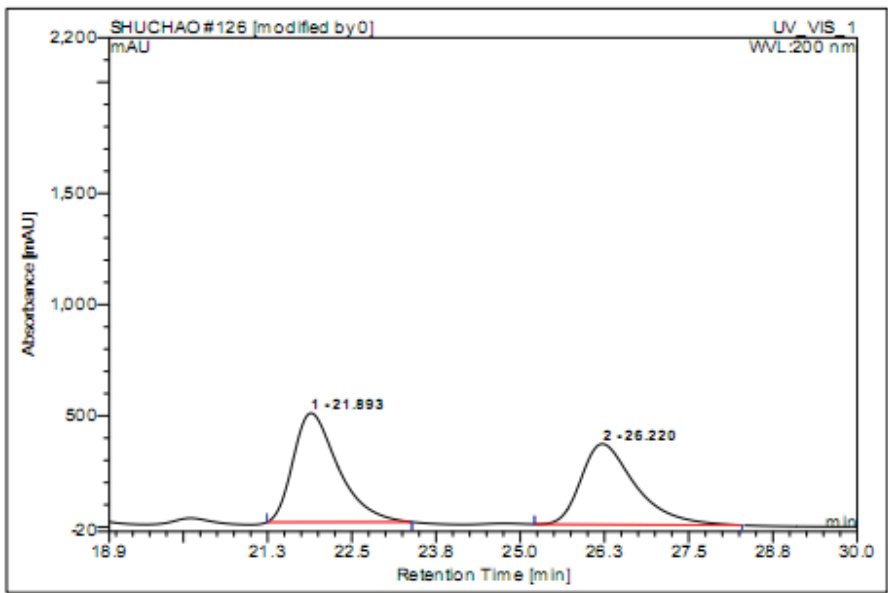

| No.    | Ret.Time<br>min | Peak Name | Height<br>mAU | Area<br>mAU*min | Rel.Area<br>% | Amount | Type |
|--------|-----------------|-----------|---------------|-----------------|---------------|--------|------|
| 1      | 21.89           | n.a.      | 489.867       | 379.653         | 52.77         | n.a.   | BMB* |
| 2      | 26.22           | n.a.      | 362.660       | 339.748         | 47.23         | n.a.   | BMB* |
| Total: |                 |           | 852.528       | 719.401         | 100.00        | 0.000  |      |

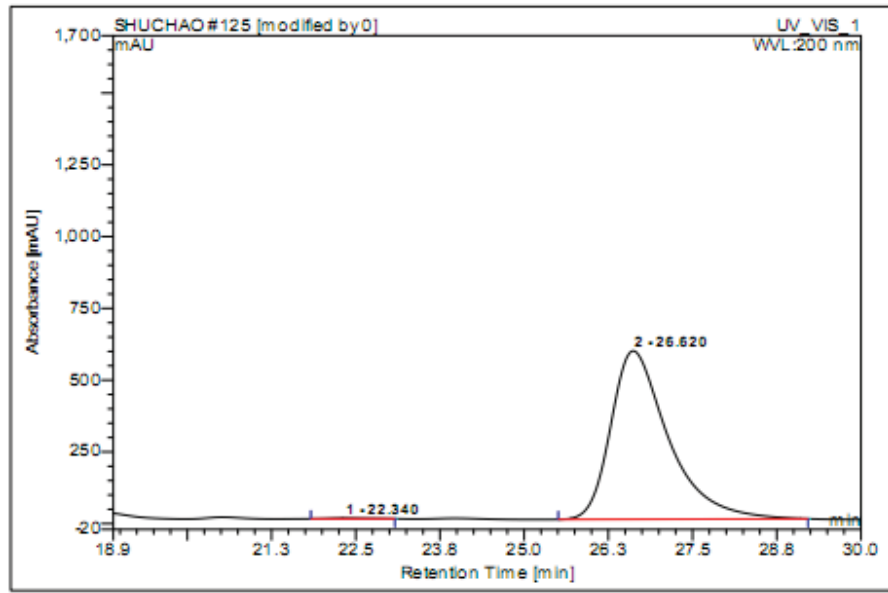

| No.    | Ret.Time<br>min | Peak Name | Height<br>mAU | Area<br>mAU*min | Rel.Area<br>% | Amount | Type |
|--------|-----------------|-----------|---------------|-----------------|---------------|--------|------|
| 1      | 22.34           | n.a.      | 2.365         | 1.585           | 0.27          | n.a.   | BMB* |
| 2      | 26.62           | n.a.      | 586.488       | 582.199         | 99.73         | n.a.   | BMB* |
| Total: |                 |           | 588.854       | 583.784         | 100.00        | 0.000  |      |

Compound 2a

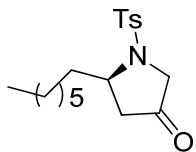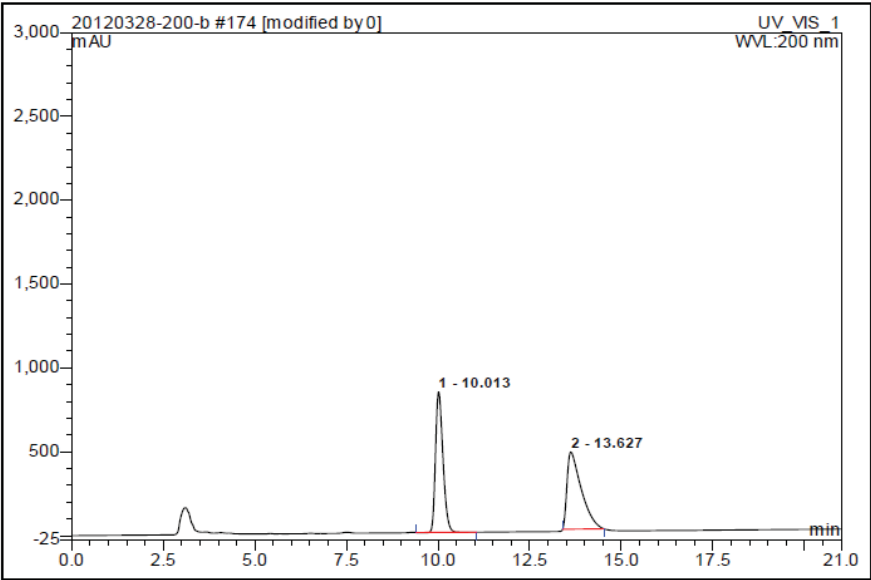

| No.    | Ret.Time<br>min | Peak Name | Height<br>mAU | Area<br>mAU*min | Rel.Area<br>% | Amount | Type |
|--------|-----------------|-----------|---------------|-----------------|---------------|--------|------|
| 1      | 10.01           | n.a.      | 837.578       | 197.642         | 48.85         | n.a.   | BMB* |
| 2      | 13.63           | n.a.      | 459.238       | 206.912         | 51.15         | n.a.   | BMB* |
| Total: |                 |           | 1296.816      | 404.554         | 100.00        | 0.000  |      |

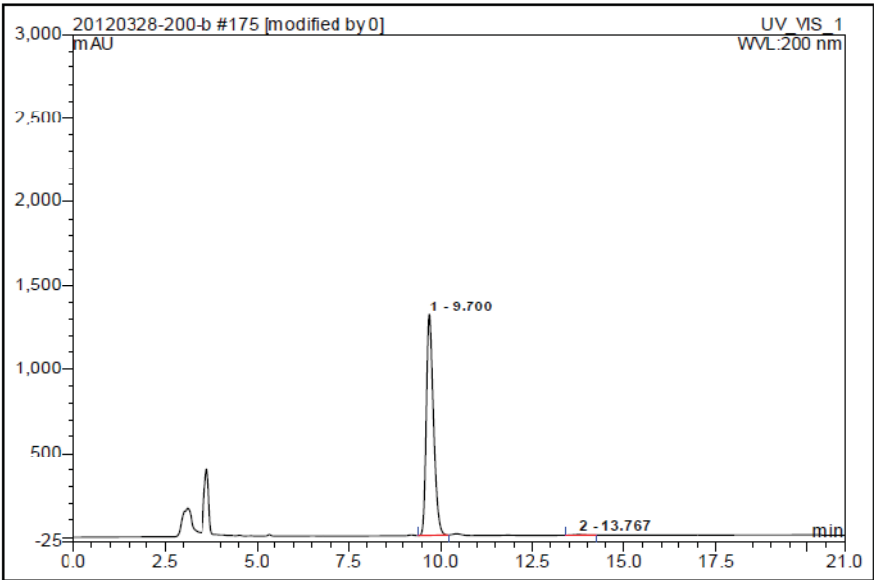

| No.    | Ret.Time<br>min | Peak Name | Height<br>mAU | Area<br>mAU*min | Rel.Area<br>% | Amount | Type |
|--------|-----------------|-----------|---------------|-----------------|---------------|--------|------|
| 1      | 9.70            | n.a.      | 1315.449      | 292.326         | 99.53         | n.a.   | BMB  |
| 2      | 13.77           | n.a.      | 3.800         | 1.392           | 0.47          | n.a.   | BMB* |
| Total: |                 |           | 1319.249      | 293.718         | 100.00        | 0.000  |      |



Compound **2b**

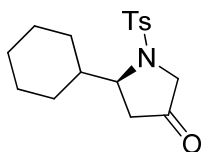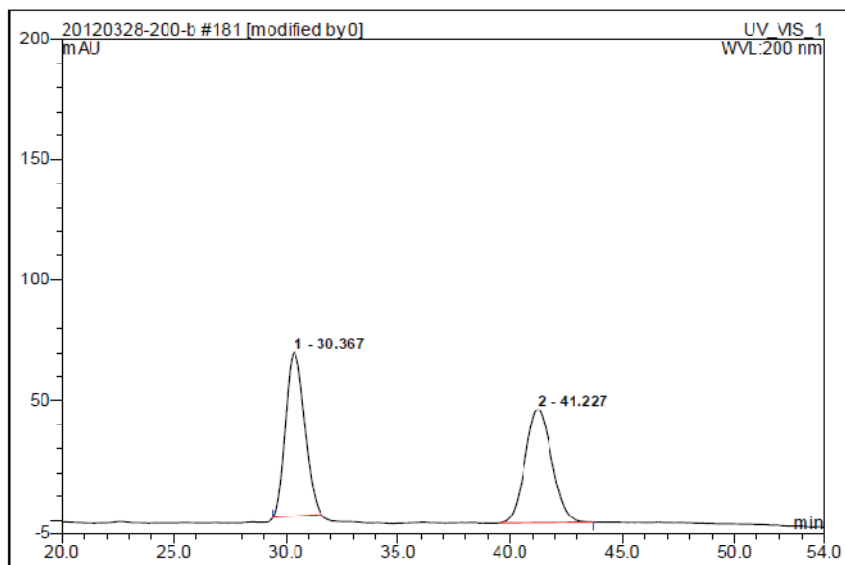

| No.    | Ret.Time<br>min | Peak Name | Height<br>mAU | Area<br>mAU*min | Rel.Area<br>% | Amount | Type |
|--------|-----------------|-----------|---------------|-----------------|---------------|--------|------|
| 1      | 30.37           | n.a.      | 60.325        | 66.765          | 50.77         | n.a.   | BMD* |
| 2      | 41.23           | n.a.      | 47.098        | 64.742          | 49.23         | n.a.   | BMB* |
| Total: |                 |           | 115.423       | 131.506         | 100.00        | 0.000  |      |

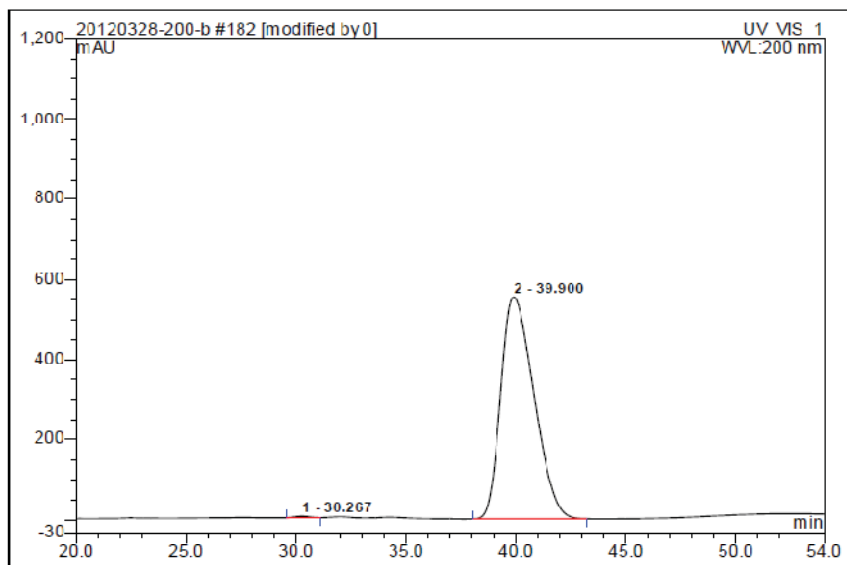

| No.    | Ret.Time<br>min | Peak Name | Height<br>mAU | Area<br>mAU*min | Rel.Area<br>% | Amount | Type |
|--------|-----------------|-----------|---------------|-----------------|---------------|--------|------|
| 1      | 30.27           | n.a.      | 3.271         | 2.637           | 0.27          | n.a.   | BMB* |
| 2      | 39.90           | n.a.      | 554.374       | 963.995         | 99.73         | n.a.   | BMB  |
| Total: |                 |           | 557.644       | 966.632         | 100.00        | 0.000  |      |

Compound 2c

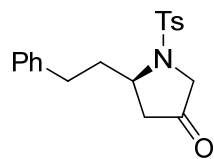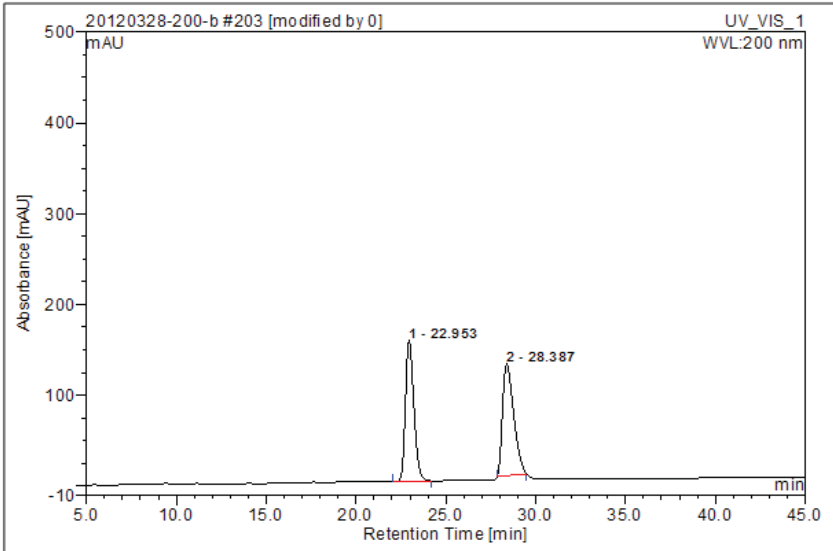

| No.    | Ret.Time<br>min | Peak Name | Height<br>mAU | Area<br>mAU*min | Rel.Area<br>% | Amount | Type |
|--------|-----------------|-----------|---------------|-----------------|---------------|--------|------|
| 1      | 22.95           | n.a.      | 155.368       | 84.662          | 48.84         | n.a.   | BMB* |
| 2      | 28.39           | n.a.      | 122.797       | 88.670          | 51.16         | n.a.   | BMB* |
| Total: |                 |           | 278.165       | 173.332         | 100.00        | 0.000  |      |

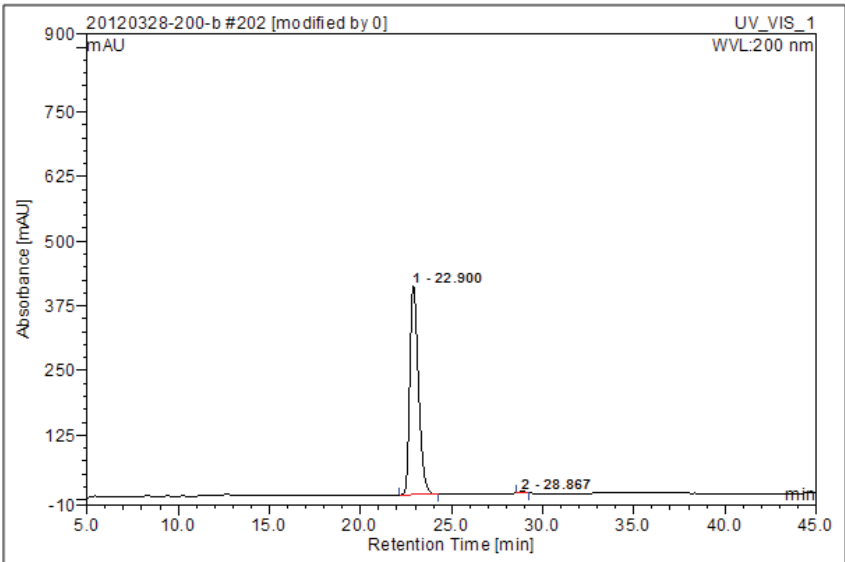

| No.    | Ret.Time<br>min | Peak Name | Height<br>mAU | Area<br>mAU*min | Rel.Area<br>% | Amount | Type |
|--------|-----------------|-----------|---------------|-----------------|---------------|--------|------|
| 1      | 22.90           | n.a.      | 403.643       | 221.984         | 99.59         | n.a.   | BMB  |
| 2      | 28.87           | n.a.      | 2.149         | 0.925           | 0.41          | n.a.   | BMB* |
| Total: |                 |           | 405.792       | 222.909         | 100.00        | 0.000  |      |

Compound **2d**

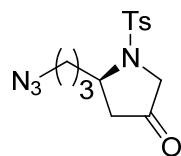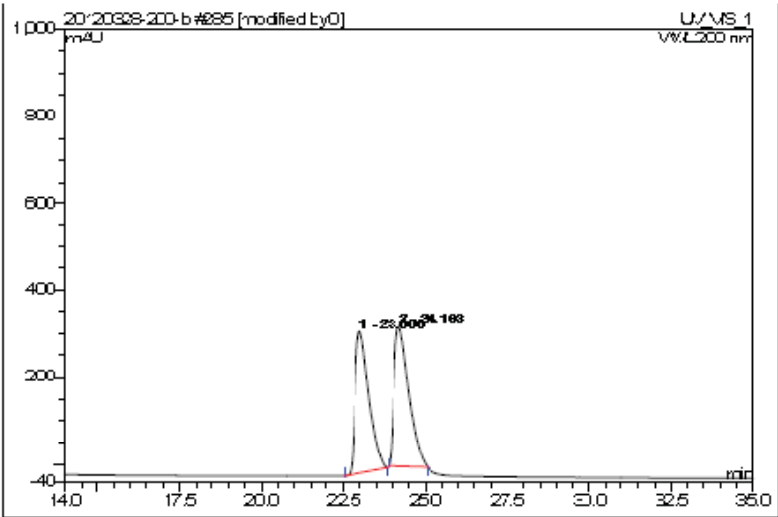

| No.    | Ret. Time<br>min | Peak Name | Height<br>mAU | Area<br>mAU*min | Rel. Area<br>% | Amount | Type             |
|--------|------------------|-----------|---------------|-----------------|----------------|--------|------------------|
| 1      | 23.00            | n.a.      | 324.020       | 155.991         | 48.34          | n.a.   | BMB <sup>2</sup> |
| 2      | 24.19            | n.a.      | 321.225       | 166.690         | 51.66          | n.a.   | BMB <sup>2</sup> |
| Total: |                  |           | 645.245       | 322.681         | 100.00         | 0.000  |                  |

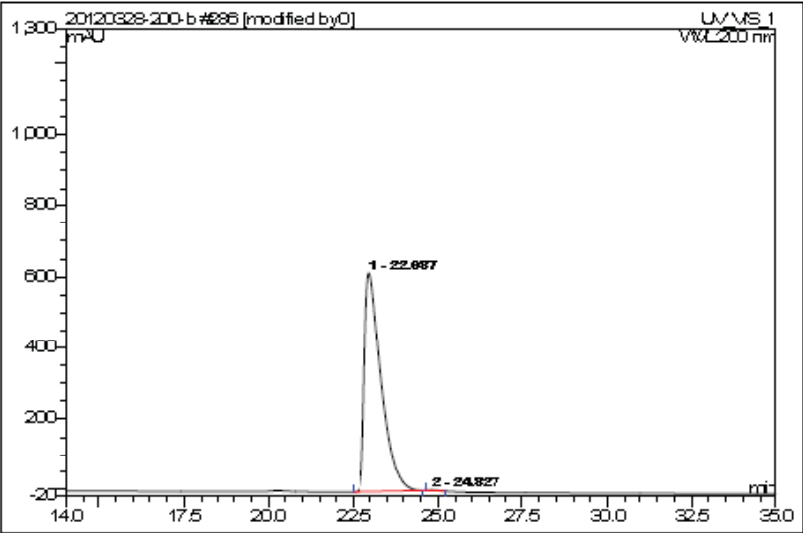

| No.    | Ret. Time<br>min | Peak Name | Height<br>mAU | Area<br>mAU*min | Rel. Area<br>% | Amount | Type             |
|--------|------------------|-----------|---------------|-----------------|----------------|--------|------------------|
| 1      | 22.99            | n.a.      | 616.744       | 352.217         | 99.84          | n.a.   | BMB              |
| 2      | 24.83            | n.a.      | 1.659         | 0.581           | 0.16           | n.a.   | BMB <sup>2</sup> |
| Total: |                  |           | 618.404       | 352.798         | 100.00         | 0.000  |                  |

Compound 2e

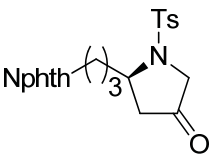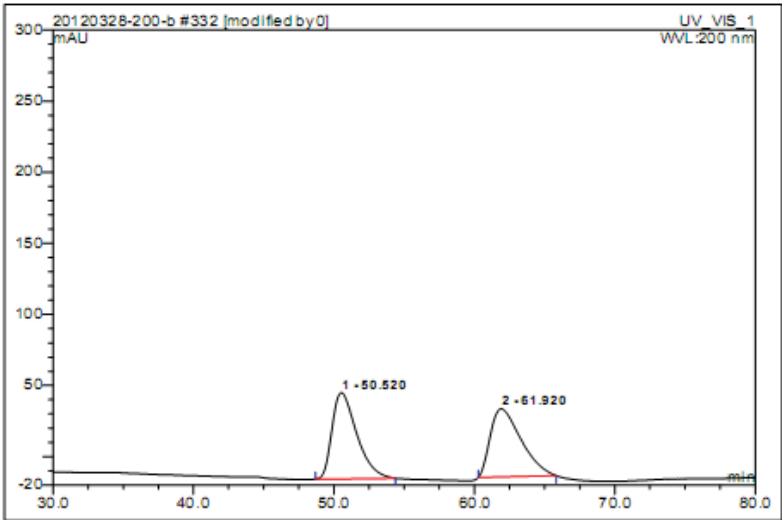

| No.    | Ret.Time<br>min | Peak Name | Height<br>mAU | Area<br>mAU*min | Rel.Area<br>% | Amount | Type |
|--------|-----------------|-----------|---------------|-----------------|---------------|--------|------|
| 1      | 50.52           | n.a.      | 60.701        | 124.203         | 50.53         | n.a.   | BMB  |
| 2      | 61.92           | n.a.      | 47.866        | 121.598         | 49.47         | n.a.   | BMB* |
| Total: |                 |           | 108.566       | 245.801         | 100.00        | 0.000  |      |

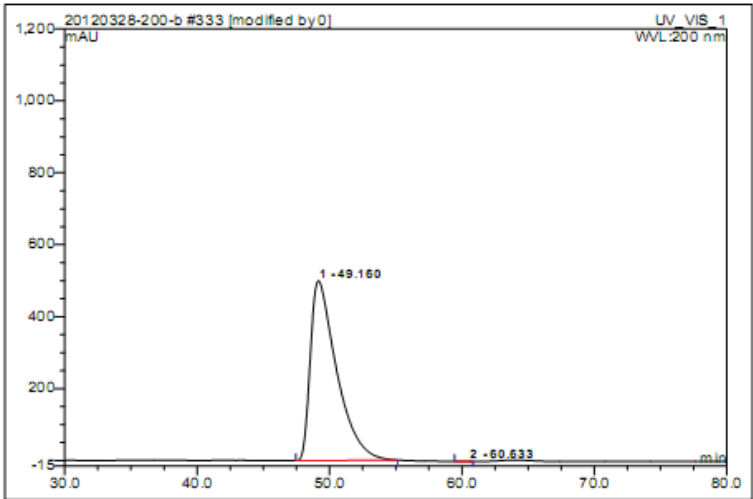

| No.    | Ret.Time<br>min | Peak Name | Height<br>mAU | Area<br>mAU*min | Rel.Area<br>% | Amount | Type |
|--------|-----------------|-----------|---------------|-----------------|---------------|--------|------|
| 1      | 49.16           | n.a.      | 499.737       | 1147.743        | 99.99         | n.a.   | BMB  |
| 2      | 60.63           | n.a.      | 0.096         | 0.090           | 0.01          | n.a.   | BMB* |
| Total: |                 |           | 499.833       | 1147.834        | 100.00        | 0.000  |      |

Compound 2f

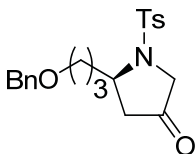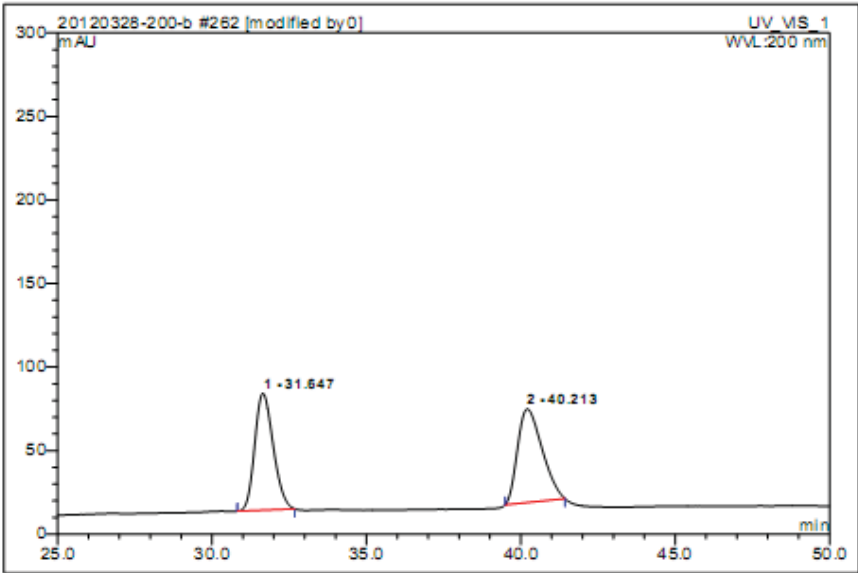

| No.    | Ret.Time<br>min | Peak Name | Height<br>mAU | Area<br>mAU*min | Rel.Area<br>% | Amount | Type |
|--------|-----------------|-----------|---------------|-----------------|---------------|--------|------|
| 1      | 31.65           | n.a.      | 69.854        | 48.560          | 48.56         | n.a.   | BMB* |
| 2      | 40.21           | n.a.      | 55.950        | 51.433          | 51.44         | n.a.   | BMB* |
| Total: |                 |           | 125.804       | 99.992          | 100.00        | 0.000  |      |

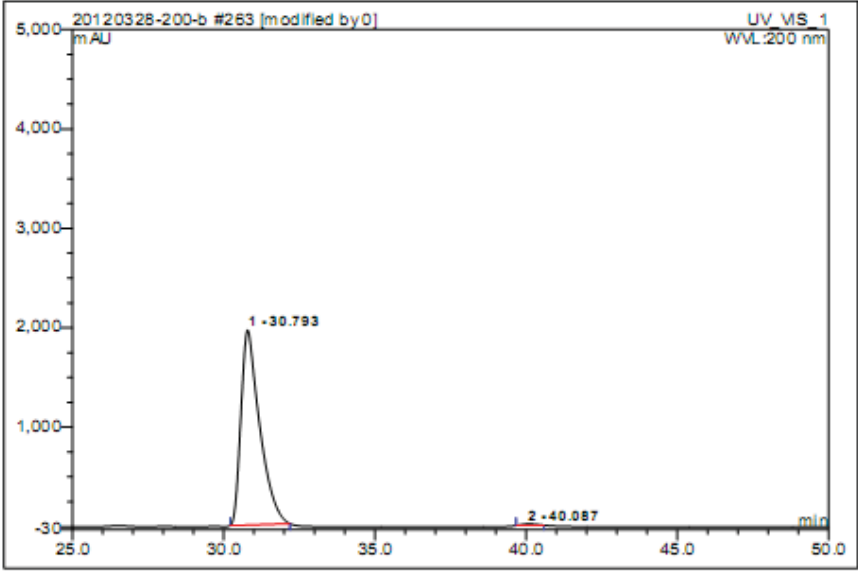

| No.    | Ret.Time<br>min | Peak Name | Height<br>mAU | Area<br>mAU*min | Rel.Area<br>% | Amount | Type |
|--------|-----------------|-----------|---------------|-----------------|---------------|--------|------|
| 1      | 30.79           | n.a.      | 1981.728      | 1406.748        | 99.45         | n.a.   | BMB* |
| 2      | 40.09           | n.a.      | 13.703        | 7.728           | 0.55          | n.a.   | BMB* |
| Total: |                 |           | 1975.431      | 1414.477        | 100.00        | 0.000  |      |

Compound 2g

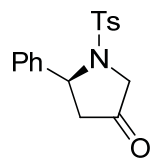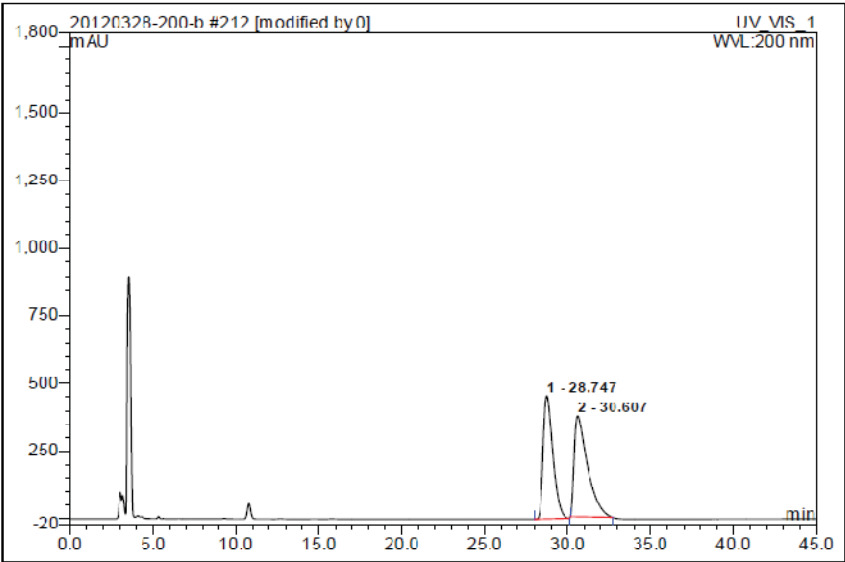

| No.    | Ret.Time<br>min | Peak Name | Height<br>mAU | Area<br>mAU*min | Rel.Area<br>% | Amount | Type |
|--------|-----------------|-----------|---------------|-----------------|---------------|--------|------|
| 1      | 28.75           | n.a.      | 454.907       | 308.005         | 47.09         | n.a.   | BMB' |
| 2      | 30.61           | n.a.      | 372.452       | 346.072         | 52.91         | n.a.   | BMB* |
| Total: |                 |           | 827.358       | 654.077         | 100.00        | 0.000  |      |

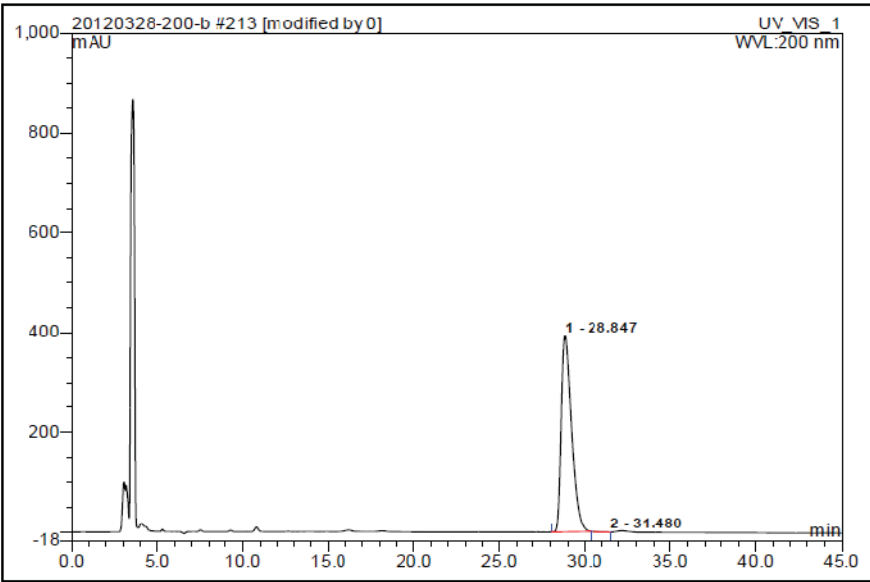

| No.    | Ret.Time<br>min | Peak Name | Height<br>mAU | Area<br>mAU*min | Rel.Area<br>% | Amount | Type |
|--------|-----------------|-----------|---------------|-----------------|---------------|--------|------|
| 1      | 28.85           | n.a.      | 393.346       | 271.434         | 99.90         | n.a.   | BMB* |
| 2      | 31.48           | n.a.      | 0.075         | 0.281           | 0.10          | n.a.   | BMB* |
| Total: |                 |           | 393.420       | 271.716         | 100.00        | 0.000  |      |

Compound 2h

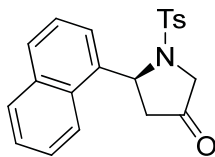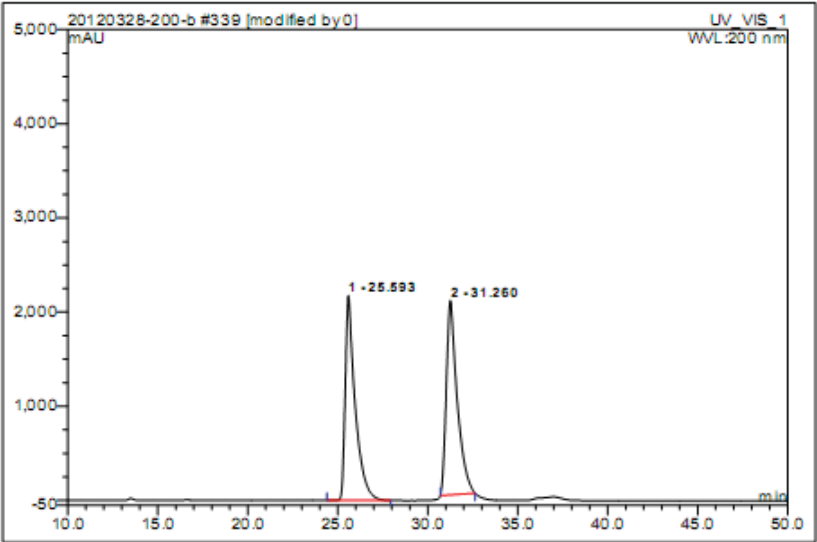

| No.    | Ret.Time<br>min | Peak Name | Height<br>mAU | Area<br>mAU*min | Rel.Area<br>% | Amount | Type |
|--------|-----------------|-----------|---------------|-----------------|---------------|--------|------|
| 1      | 25.59           | n.a.      | 2176.132      | 1389.687        | 49.17         | n.a.   | BMB* |
| 2      | 31.26           | n.a.      | 2063.635      | 1436.770        | 50.83         | n.a.   | BMB* |
| Total: |                 |           | 4239.767      | 2826.457        | 100.00        | 0.000  |      |

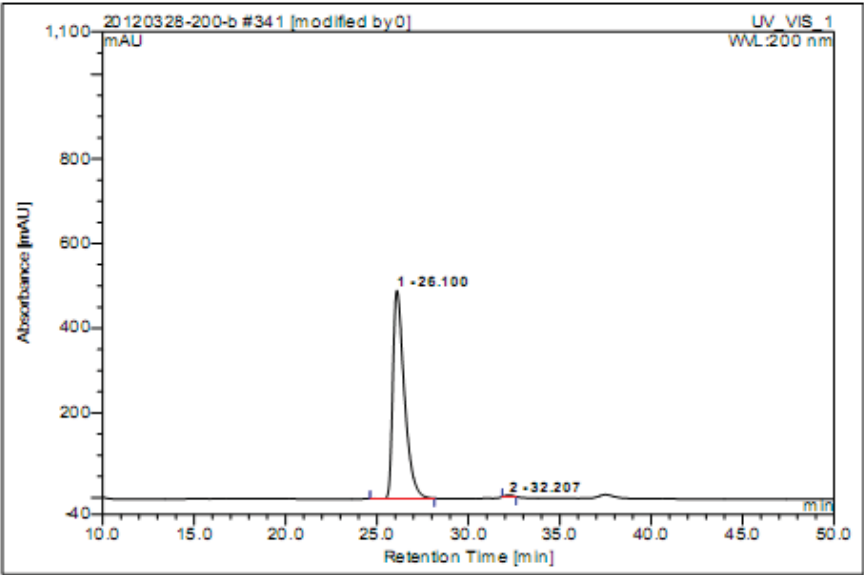

| No.    | Ret.Time<br>min | Peak Name | Height<br>mAU | Area<br>mAU*min | Rel.Area<br>% | Amount | Type |
|--------|-----------------|-----------|---------------|-----------------|---------------|--------|------|
| 1      | 26.10           | n.a.      | 491.527       | 358.998         | 99.49         | n.a.   | BMB* |
| 2      | 32.21           | n.a.      | 3.951         | 1.856           | 0.51          | n.a.   | BMB* |
| Total: |                 |           | 495.478       | 360.854         | 100.00        | 0.000  |      |

Compound 2i

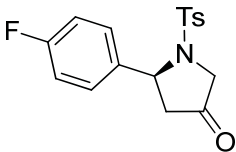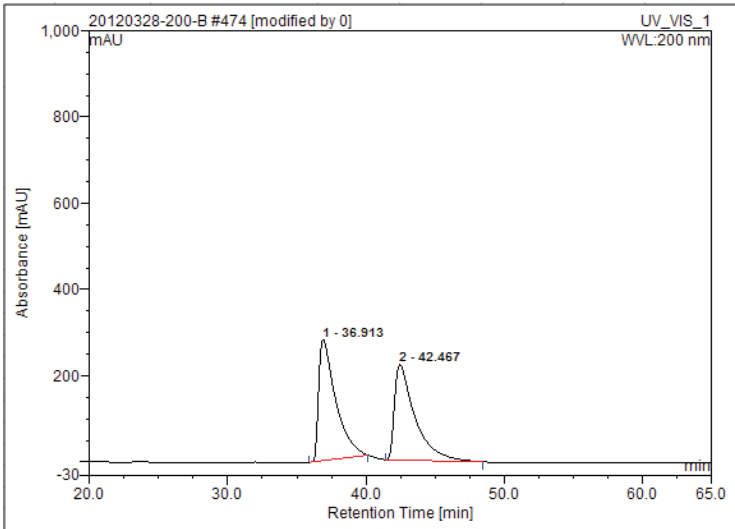

| No.    | Ret.Time<br>min | Peak Name | Height<br>mAU | Area<br>mAU*min | Rel.Area<br>% | Amount | Type |
|--------|-----------------|-----------|---------------|-----------------|---------------|--------|------|
| 1      | 36.91           | n.a.      | 280.222       | 401.925         | 51.37         | n.a.   | BMB* |
| 2      | 42.47           | n.a.      | 220.946       | 380.490         | 48.63         | n.a.   | BMB* |
| Total: |                 |           | 501.169       | 782.415         | 100.00        | 0.000  |      |

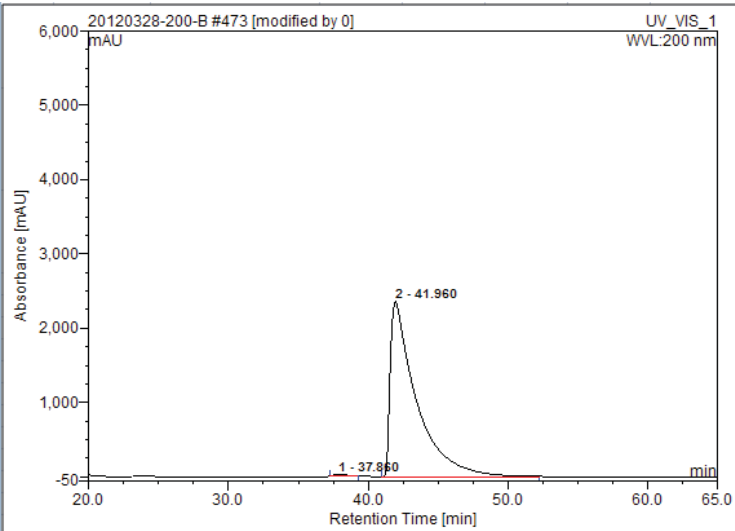

| No.    | Ret.Time<br>min | Peak Name | Height<br>mAU | Area<br>mAU*min | Rel.Area<br>% | Amount | Type |
|--------|-----------------|-----------|---------------|-----------------|---------------|--------|------|
| 1      | 37.86           | n.a.      | 27.468        | 27.968          | 0.55          | n.a.   | BMB* |
| 2      | 41.96           | n.a.      | 2357.842      | 5070.208        | 99.45         | n.a.   | BMB  |
| Total: |                 |           | 2385.310      | 5098.176        | 100.00        | 0.000  |      |



Compound 2j

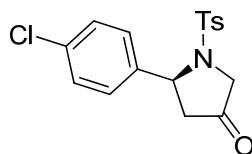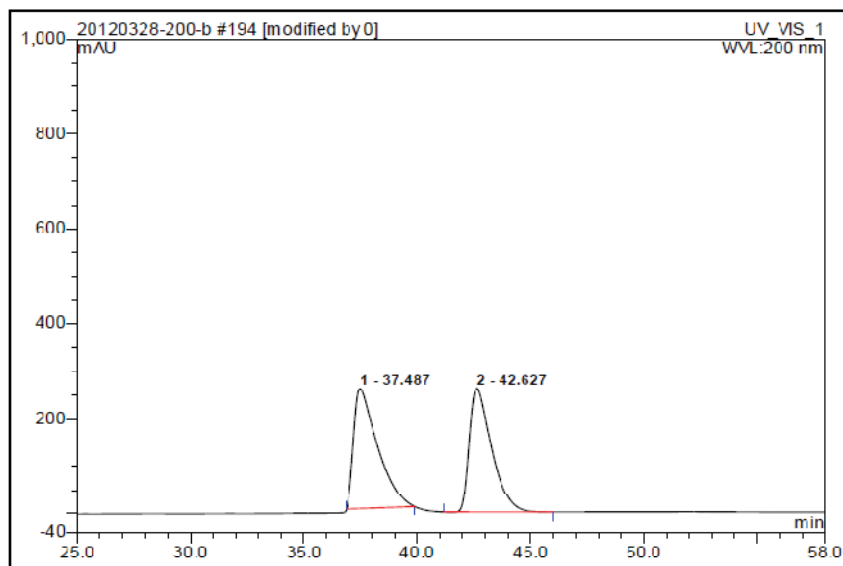

| No.    | Ret. Time<br>min | Peak Name | Height<br>mAU | Area<br>mAU*min | Rel. Area<br>% | Amount | Type |
|--------|------------------|-----------|---------------|-----------------|----------------|--------|------|
| 1      | 37.49            | n.a.      | 253.738       | 311.874         | 51.01          | n.a.   | BMB* |
| 2      | 42.63            | n.a.      | 261.855       | 299.583         | 48.99          | n.a.   | BMB* |
| Total: |                  |           | 515.593       | 611.458         | 100.00         | 0.000  |      |

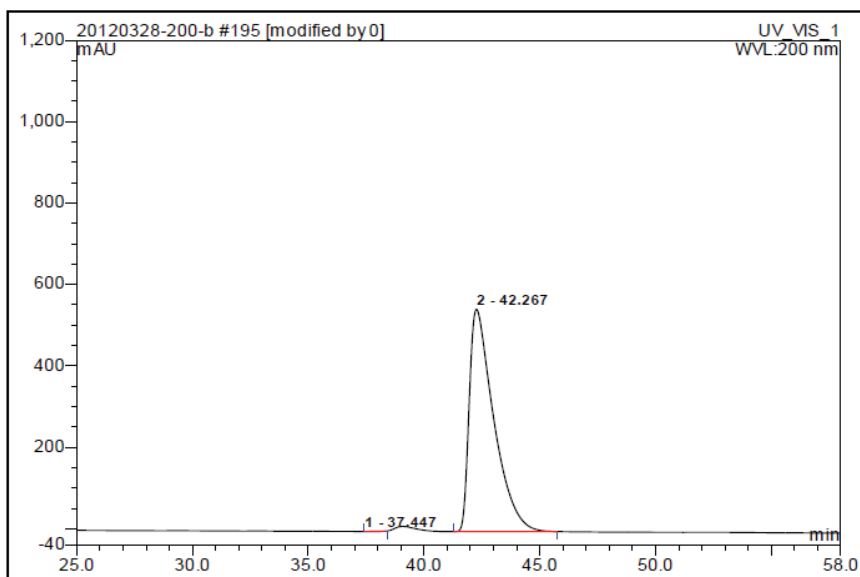

| No.    | Ret. Time<br>min | Peak Name | Height<br>mAU | Area<br>mAU*min | Rel. Area<br>% | Amount | Type |
|--------|------------------|-----------|---------------|-----------------|----------------|--------|------|
| 1      | 37.45            | n.a.      | 0.092         | 0.387           | 0.06           | n.a.   | BMB* |
| 2      | 42.27            | n.a.      | 546.260       | 668.088         | 99.94          | n.a.   | BMB  |
| Total: |                  |           | 546.353       | 668.476         | 100.00         | 0.000  |      |

O=C1CC[C@H](c2ccc(Br)cc2)N1Cc3ccccc3

Compound 21

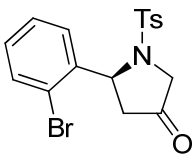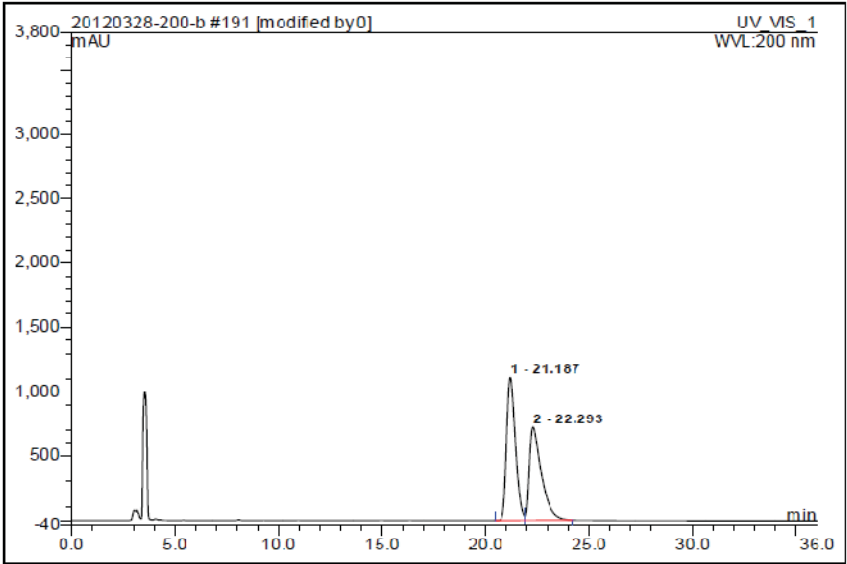

| No.    | Ret.Time<br>min | Peak Name | Height<br>mAU | Area<br>mAU*min | Rel.Area<br>% | Amount | Type |
|--------|-----------------|-----------|---------------|-----------------|---------------|--------|------|
| 1      | 21.19           | n.a.      | 1110.329      | 539.675         | 53.09         | n.a.   | BM * |
| 2      | 22.29           | n.a.      | 720.394       | 476.856         | 46.91         | n.a.   | MB*  |
| Total: |                 |           | 1830.723      | 1016.531        | 100.00        | 0.000  |      |

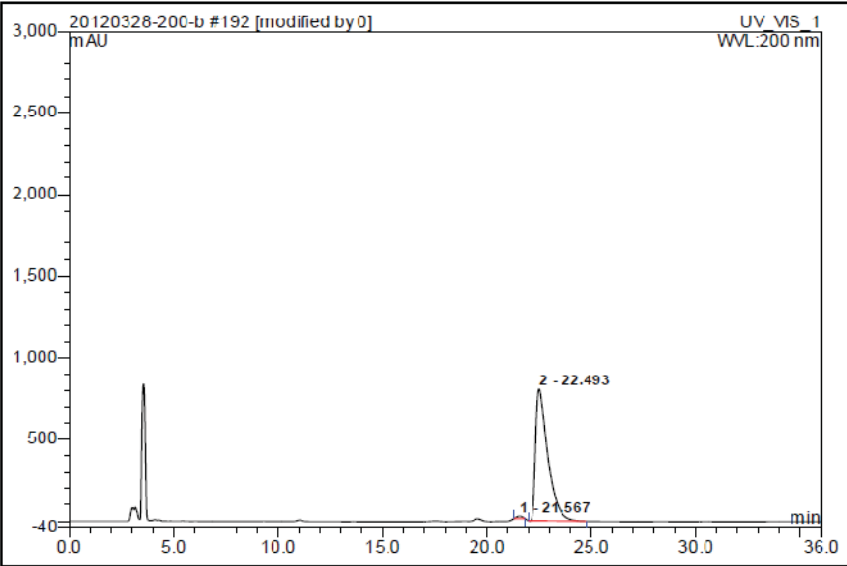

| No.    | Ret.Time<br>min | Peak Name | Height<br>mAU | Area<br>mAU*min | Rel.Area<br>% | Amount | Type |
|--------|-----------------|-----------|---------------|-----------------|---------------|--------|------|
| 1      | 21.57           | n.a.      | 13.618        | 4.169           | 0.77          | n.a.   | BMB* |
| 2      | 22.49           | n.a.      | 806.700       | 536.655         | 99.23         | n.a.   | BMB* |
| Total: |                 |           | 820.348       | 540.824         | 100.00        | 0.000  |      |

Compound **2m**

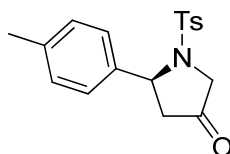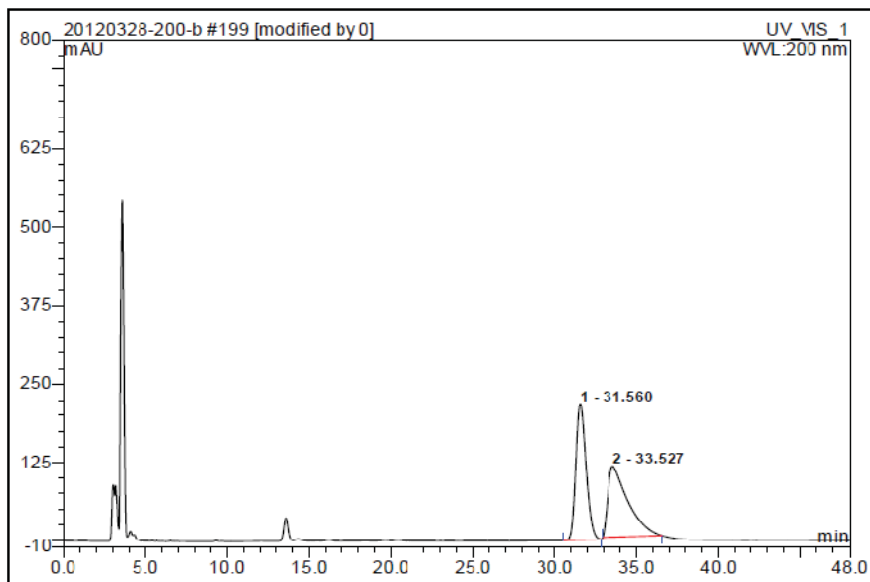

| No.    | Ret.Time<br>min | Peak Name | Height<br>mAU | Area<br>mAU*min | Rel.Area<br>% | Amount | Type |
|--------|-----------------|-----------|---------------|-----------------|---------------|--------|------|
| 1      | 31.56           | n.a.      | 216.688       | 156.299         | 49.44         | n.a.   | BMB* |
| 2      | 33.53           | n.a.      | 113.212       | 159.840         | 50.56         | n.a.   | BMB* |
| Total: |                 |           | 329.900       | 316.139         | 100.00        | 0.000  |      |

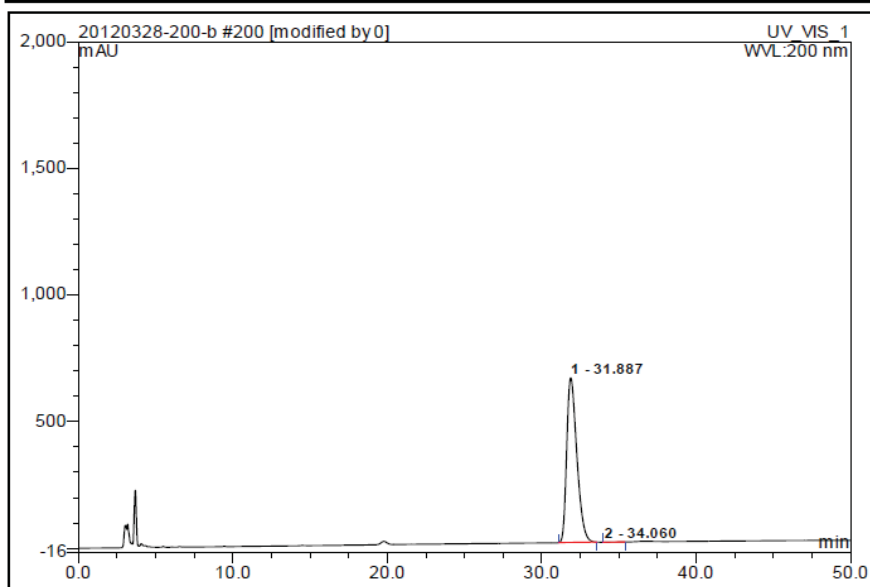

| No.    | Ret.Time<br>min | Peak Name | Height<br>mAU | Area<br>mAU*min | Rel.Area<br>% | Amount | Type |
|--------|-----------------|-----------|---------------|-----------------|---------------|--------|------|
| 1      | 31.89           | n.a.      | 649.524       | 493.845         | 99.98         | n.a.   | BMB* |
| 2      | 34.06           | n.a.      | 0.091         | 0.090           | 0.02          | n.a.   | BMB* |
| Total: |                 |           | 649.615       | 493.936         | 100.00        | 0.000  |      |

Compound 2n

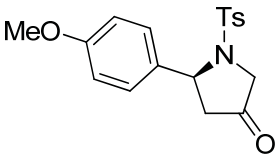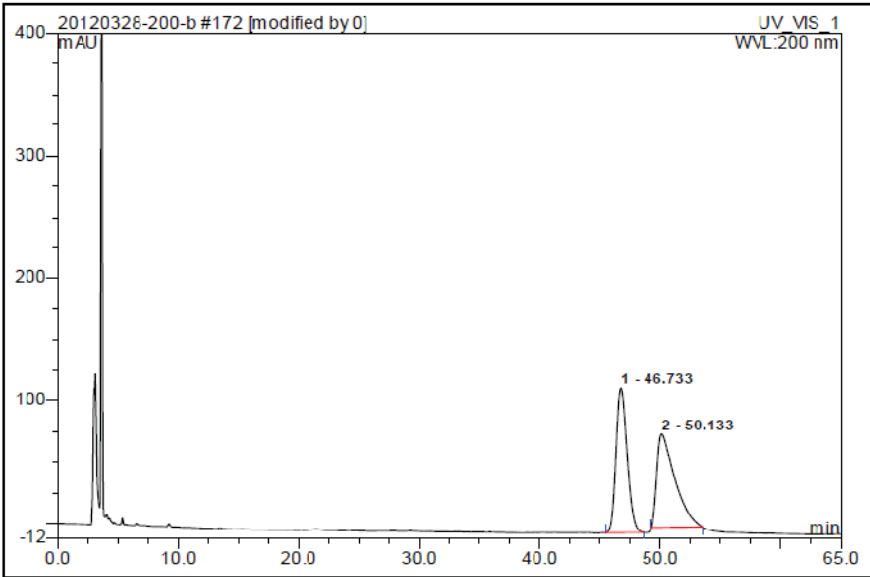

| No.    | Ret.Time<br>min | Peak Name | Height<br>mAU | Area<br>mAU*min | Rel.Area<br>% | Amount | Type |
|--------|-----------------|-----------|---------------|-----------------|---------------|--------|------|
| 1      | 46.73           | n.a.      | 117.633       | 124.689         | 48.65         | n.a.   | BMB  |
| 2      | 50.13           | n.a.      | 75.930        | 131.588         | 51.35         | n.a.   | BMB* |
| Total: |                 |           | 193.563       | 256.277         | 100.00        | 0.000  |      |

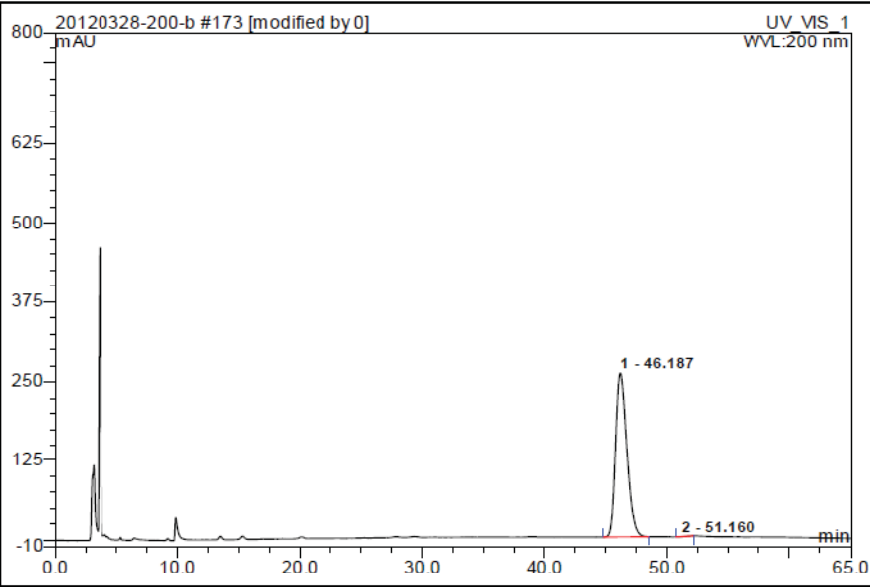

| No.    | Ret.Time<br>min | Peak Name | Height<br>mAU | Area<br>mAU*min | Rel.Area<br>% | Amount | Type |
|--------|-----------------|-----------|---------------|-----------------|---------------|--------|------|
| 1      | 46.19           | n.a.      | 258.555       | 275.138         | 99.93         | n.a.   | BMB  |
| 2      | 51.16           | n.a.      | 0.329         | 0.190           | 0.07          | n.a.   | BMB* |
| Total: |                 |           | 258.884       | 275.329         | 100.00        | 0.000  |      |

Compound **2a'**

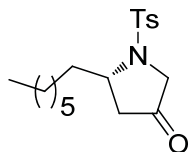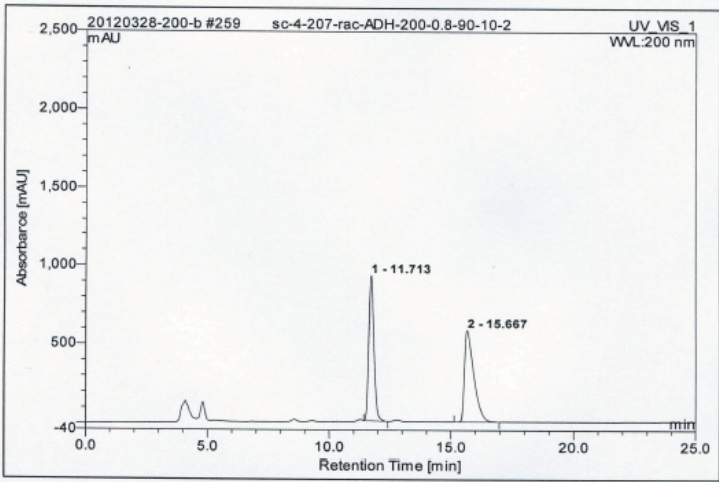

| No.    | Ret.Time<br>min | Peak Name | Height<br>mAU | Area<br>mAU*min | Rel.Area<br>% | Amount | Type |
|--------|-----------------|-----------|---------------|-----------------|---------------|--------|------|
| 1      | 11.71           | n.a.      | 924.492       | 225.516         | 46.77         | n.a.   | BMB  |
| 2      | 15.67           | n.a.      | 581.912       | 256.696         | 53.23         | n.a.   | BMB  |
| Total: |                 |           | 1506.404      | 482.211         | 100.00        | 0.000  |      |

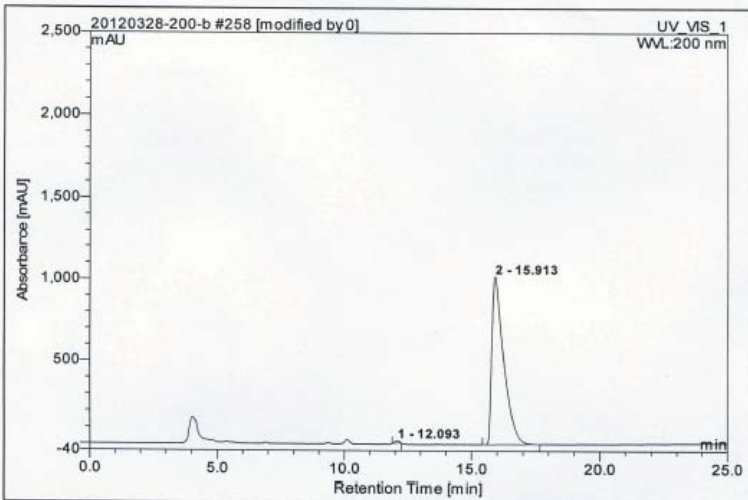

| No.    | Ret.Time<br>min | Peak Name | Height<br>mAU | Area<br>mAU*min | Rel.Area<br>% | Amount | Type |
|--------|-----------------|-----------|---------------|-----------------|---------------|--------|------|
| 1      | 12.09           | n.a.      | 15.178        | 3.027           | 0.56          | n.a.   | BMB* |
| 2      | 15.91           | n.a.      | 1019.365      | 540.498         | 99.44         | n.a.   | BMB  |
| Total: |                 |           | 1034.543      | 543.525         | 100.00        | 0.000  |      |

Compound 2q

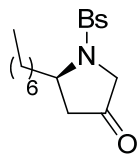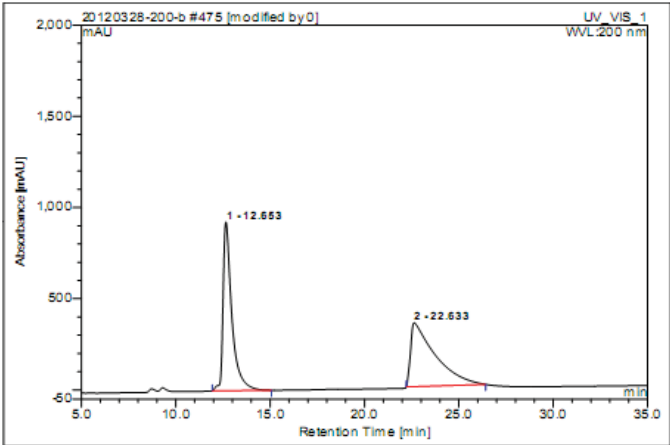

| No.    | Ret. Time<br>min | Peak Name | Height<br>mAU | Area<br>mAU*min | Rel. Area<br>% | Amount | Type |
|--------|------------------|-----------|---------------|-----------------|----------------|--------|------|
| 1      | 12.65            | n.a.      | 924.460       | 500.170         | 48.79          | n.a.   | BMB* |
| 2      | 22.63            | n.a.      | 319.653       | 525.006         | 51.21          | n.a.   | BMB* |
| Total: |                  |           | 1274.113      | 1025.176        | 100.00         | 0.000  |      |

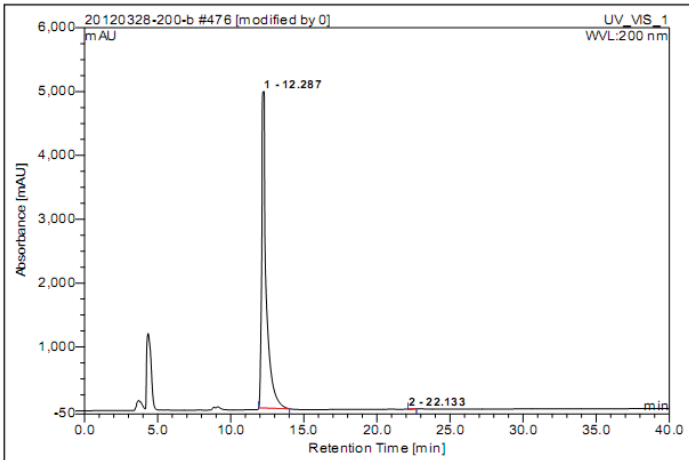

| No.    | Ret. Time<br>min | Peak Name | Height<br>mAU | Area<br>mAU*min | Rel. Area<br>% | Amount | Type |
|--------|------------------|-----------|---------------|-----------------|----------------|--------|------|
| 1      | 12.29            | n.a.      | 4957.102      | 1824.678        | 99.98          | n.a.   | BMB* |
| 2      | 22.13            | n.a.      | 0.070         | 0.374           | 0.02           | n.a.   | BMB* |
| Total: |                  |           | 4957.171      | 1825.052        | 100.00         | 0.000  |      |

Compound **2r**

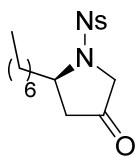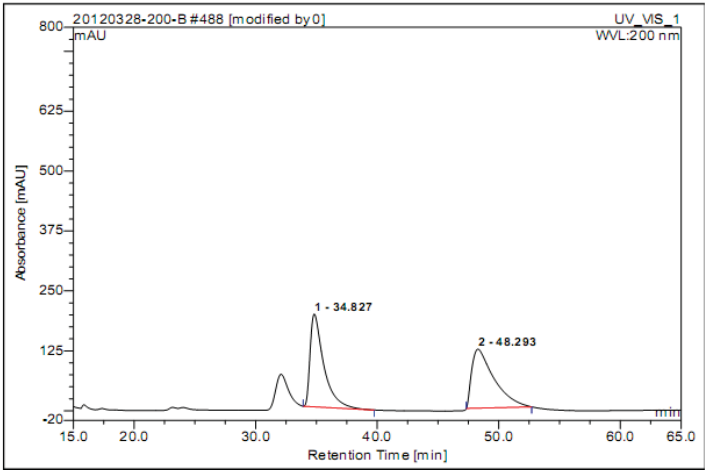

| No.    | Ret.Time<br>min | Peak Name | Height<br>mAU | Area<br>mAU*min | Rel.Area<br>% | Amount | Type |
|--------|-----------------|-----------|---------------|-----------------|---------------|--------|------|
| 1      | 34.83           | n.a.      | 193.595       | 251.957         | 49.04         | n.a.   | BMB  |
| 2      | 48.29           | n.a.      | 123.098       | 261.771         | 50.96         | n.a.   | BMB* |
| Total: |                 |           | 316.693       | 513.728         | 100.00        | 0.000  |      |

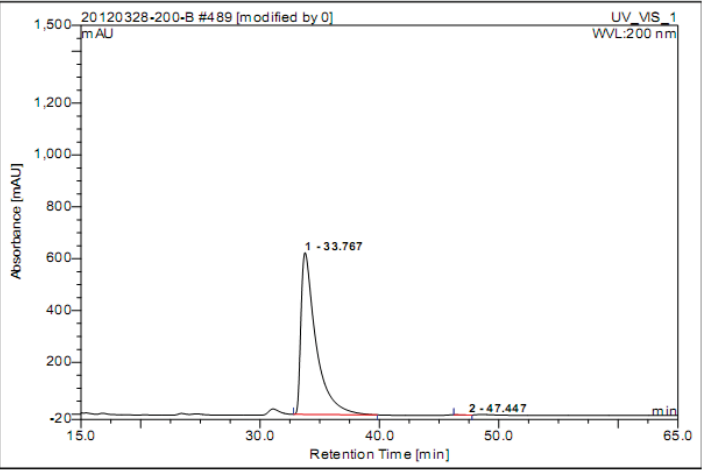

| No.    | Ret.Time<br>min | Peak Name | Height<br>mAU | Area<br>mAU*min | Rel.Area<br>% | Amount | Type |
|--------|-----------------|-----------|---------------|-----------------|---------------|--------|------|
| 1      | 33.77           | n.a.      | 623.531       | 910.438         | 99.93         | n.a.   | BMB  |
| 2      | 47.45           | n.a.      | 0.720         | 0.665           | 0.07          | n.a.   | BMB* |
| Total: |                 |           | 624.251       | 911.102         | 100.00        | 0.000  |      |



Compound 2s

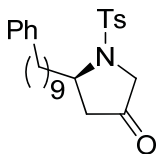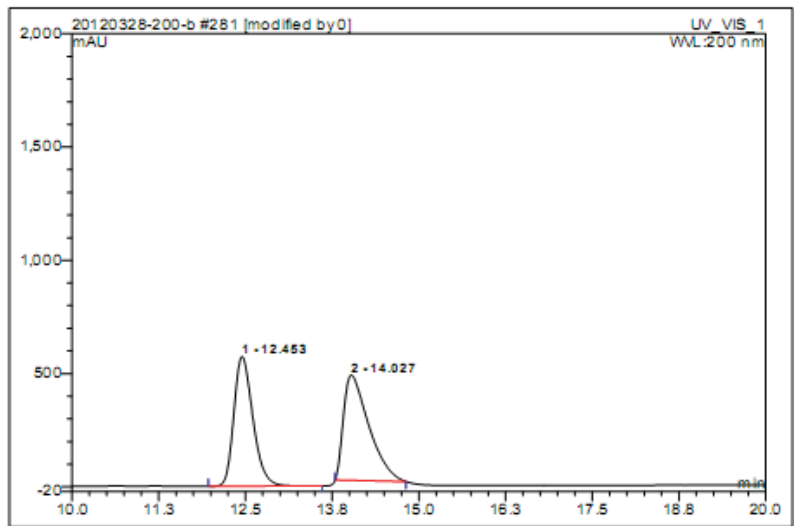

| No.    | Ret.Time<br>min | Peak Name | Height<br>mAU | Area<br>mAU*min | Rel.Area<br>% | Amount | Type |
|--------|-----------------|-----------|---------------|-----------------|---------------|--------|------|
| 1      | 12.45           | n.a.      | 571.374       | 181.836         | 48.07         | n.a.   | BMB* |
| 2      | 14.03           | n.a.      | 464.315       | 196.409         | 51.93         | n.a.   | BMB* |
| Total: |                 |           | 1035.690      | 378.245         | 100.00        | 0.000  |      |

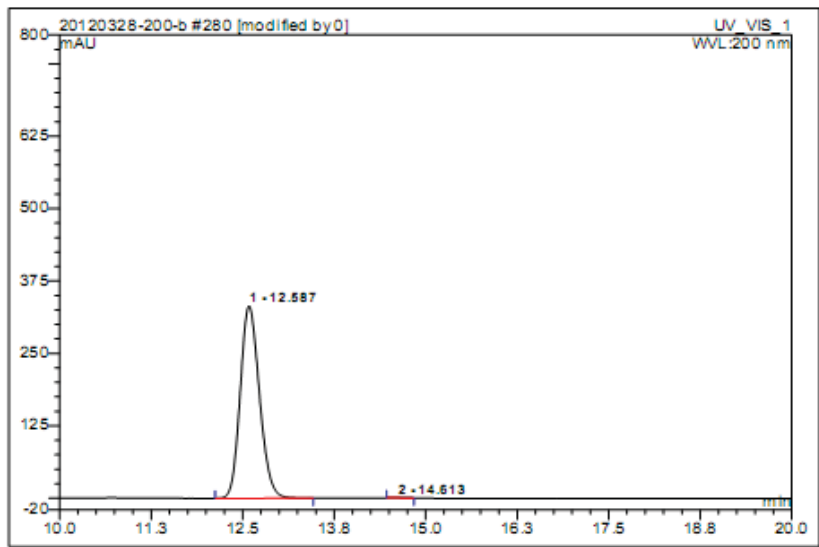

| No.    | Ret.Time<br>min | Peak Name | Height<br>mAU | Area<br>mAU*min | Rel.Area<br>% | Amount | Type |
|--------|-----------------|-----------|---------------|-----------------|---------------|--------|------|
| 1      | 12.59           | n.a.      | 332.000       | 101.202         | 99.88         | n.a.   | BMB  |
| 2      | 14.61           | n.a.      | 0.537         | 0.126           | 0.12          | n.a.   | BMB* |
| Total: |                 |           | 332.537       | 101.328         | 100.00        | 0.000  |      |

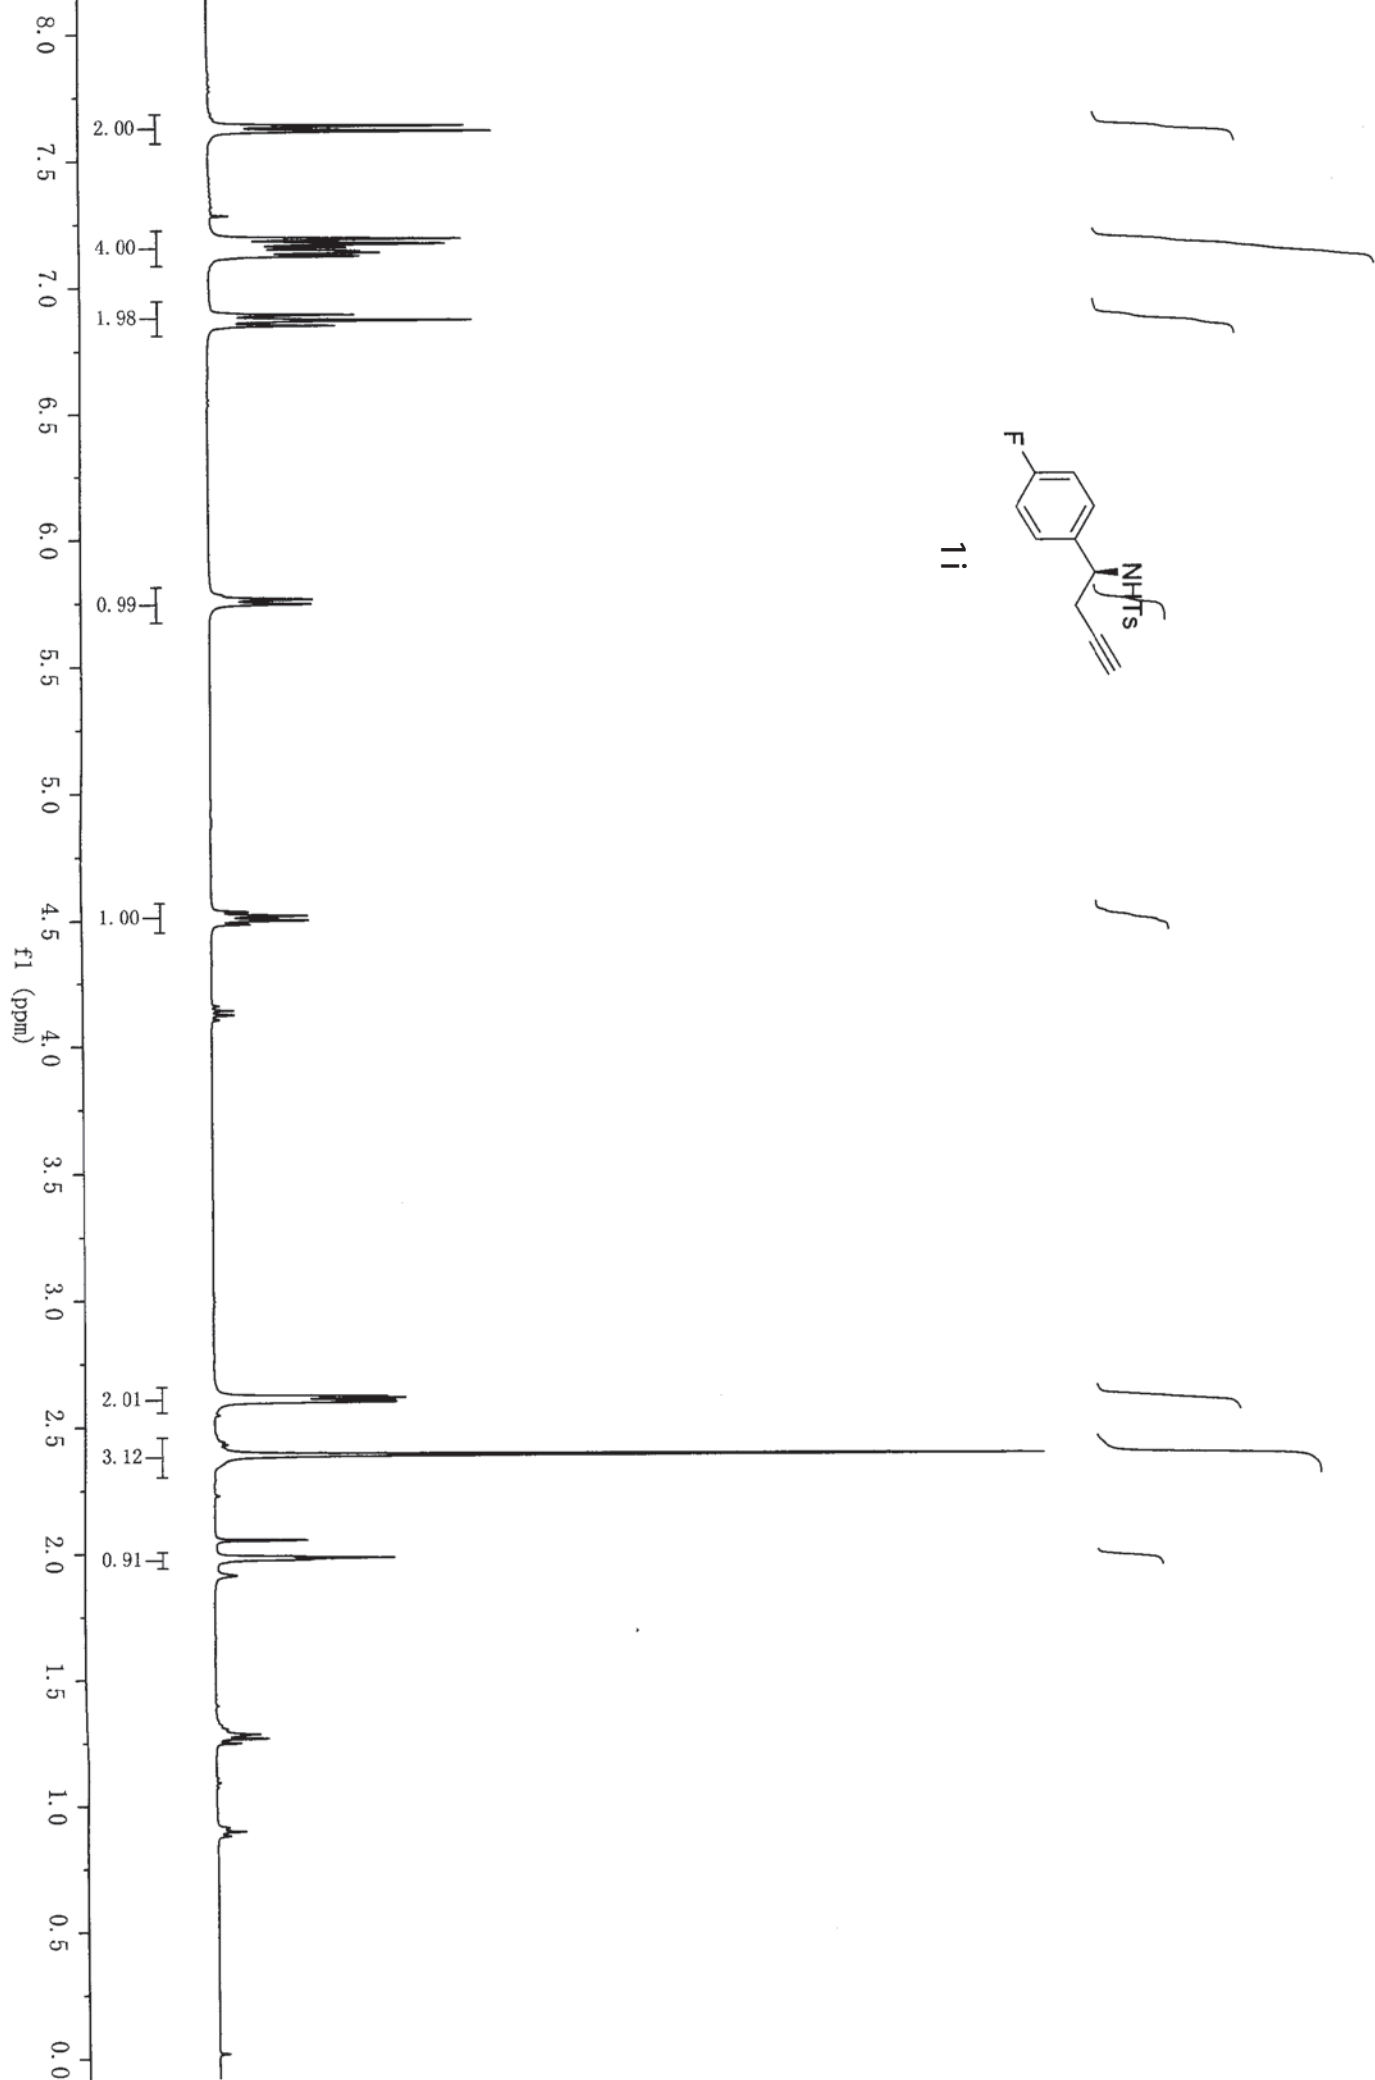

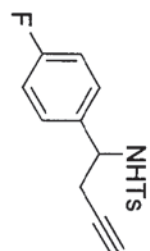

1i

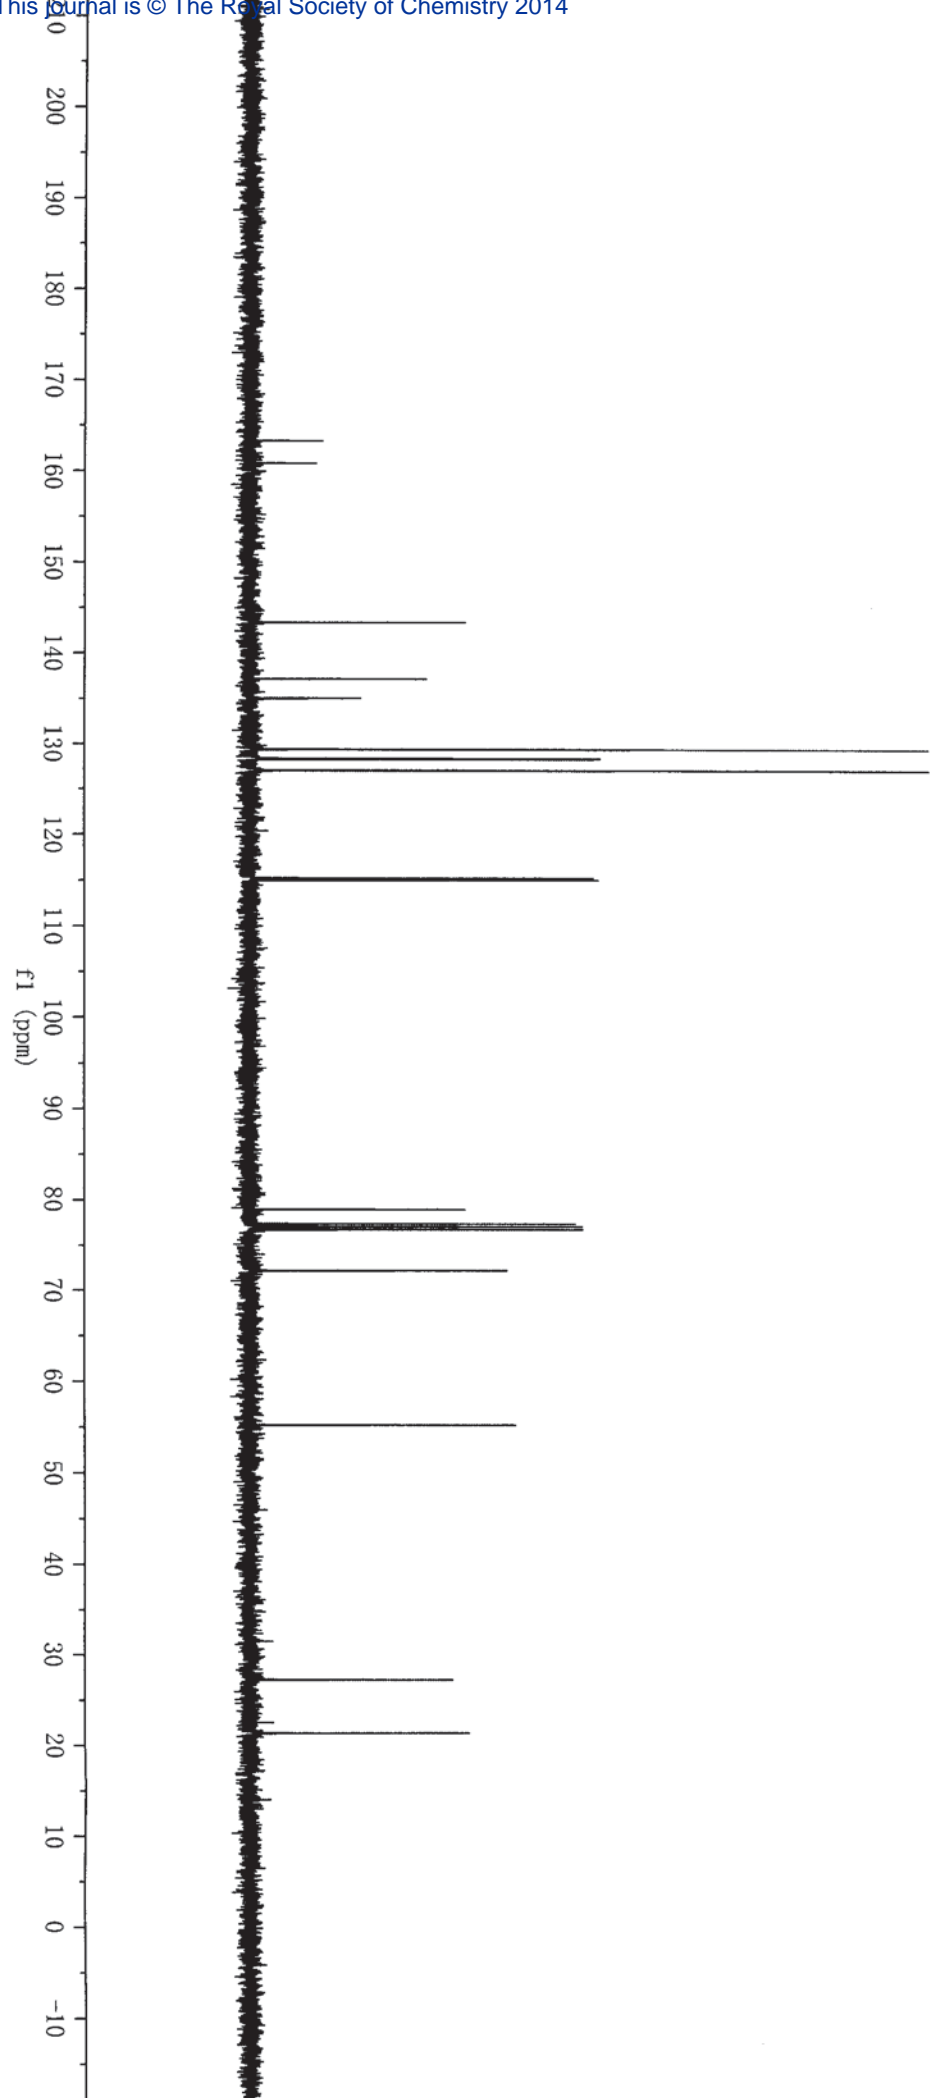

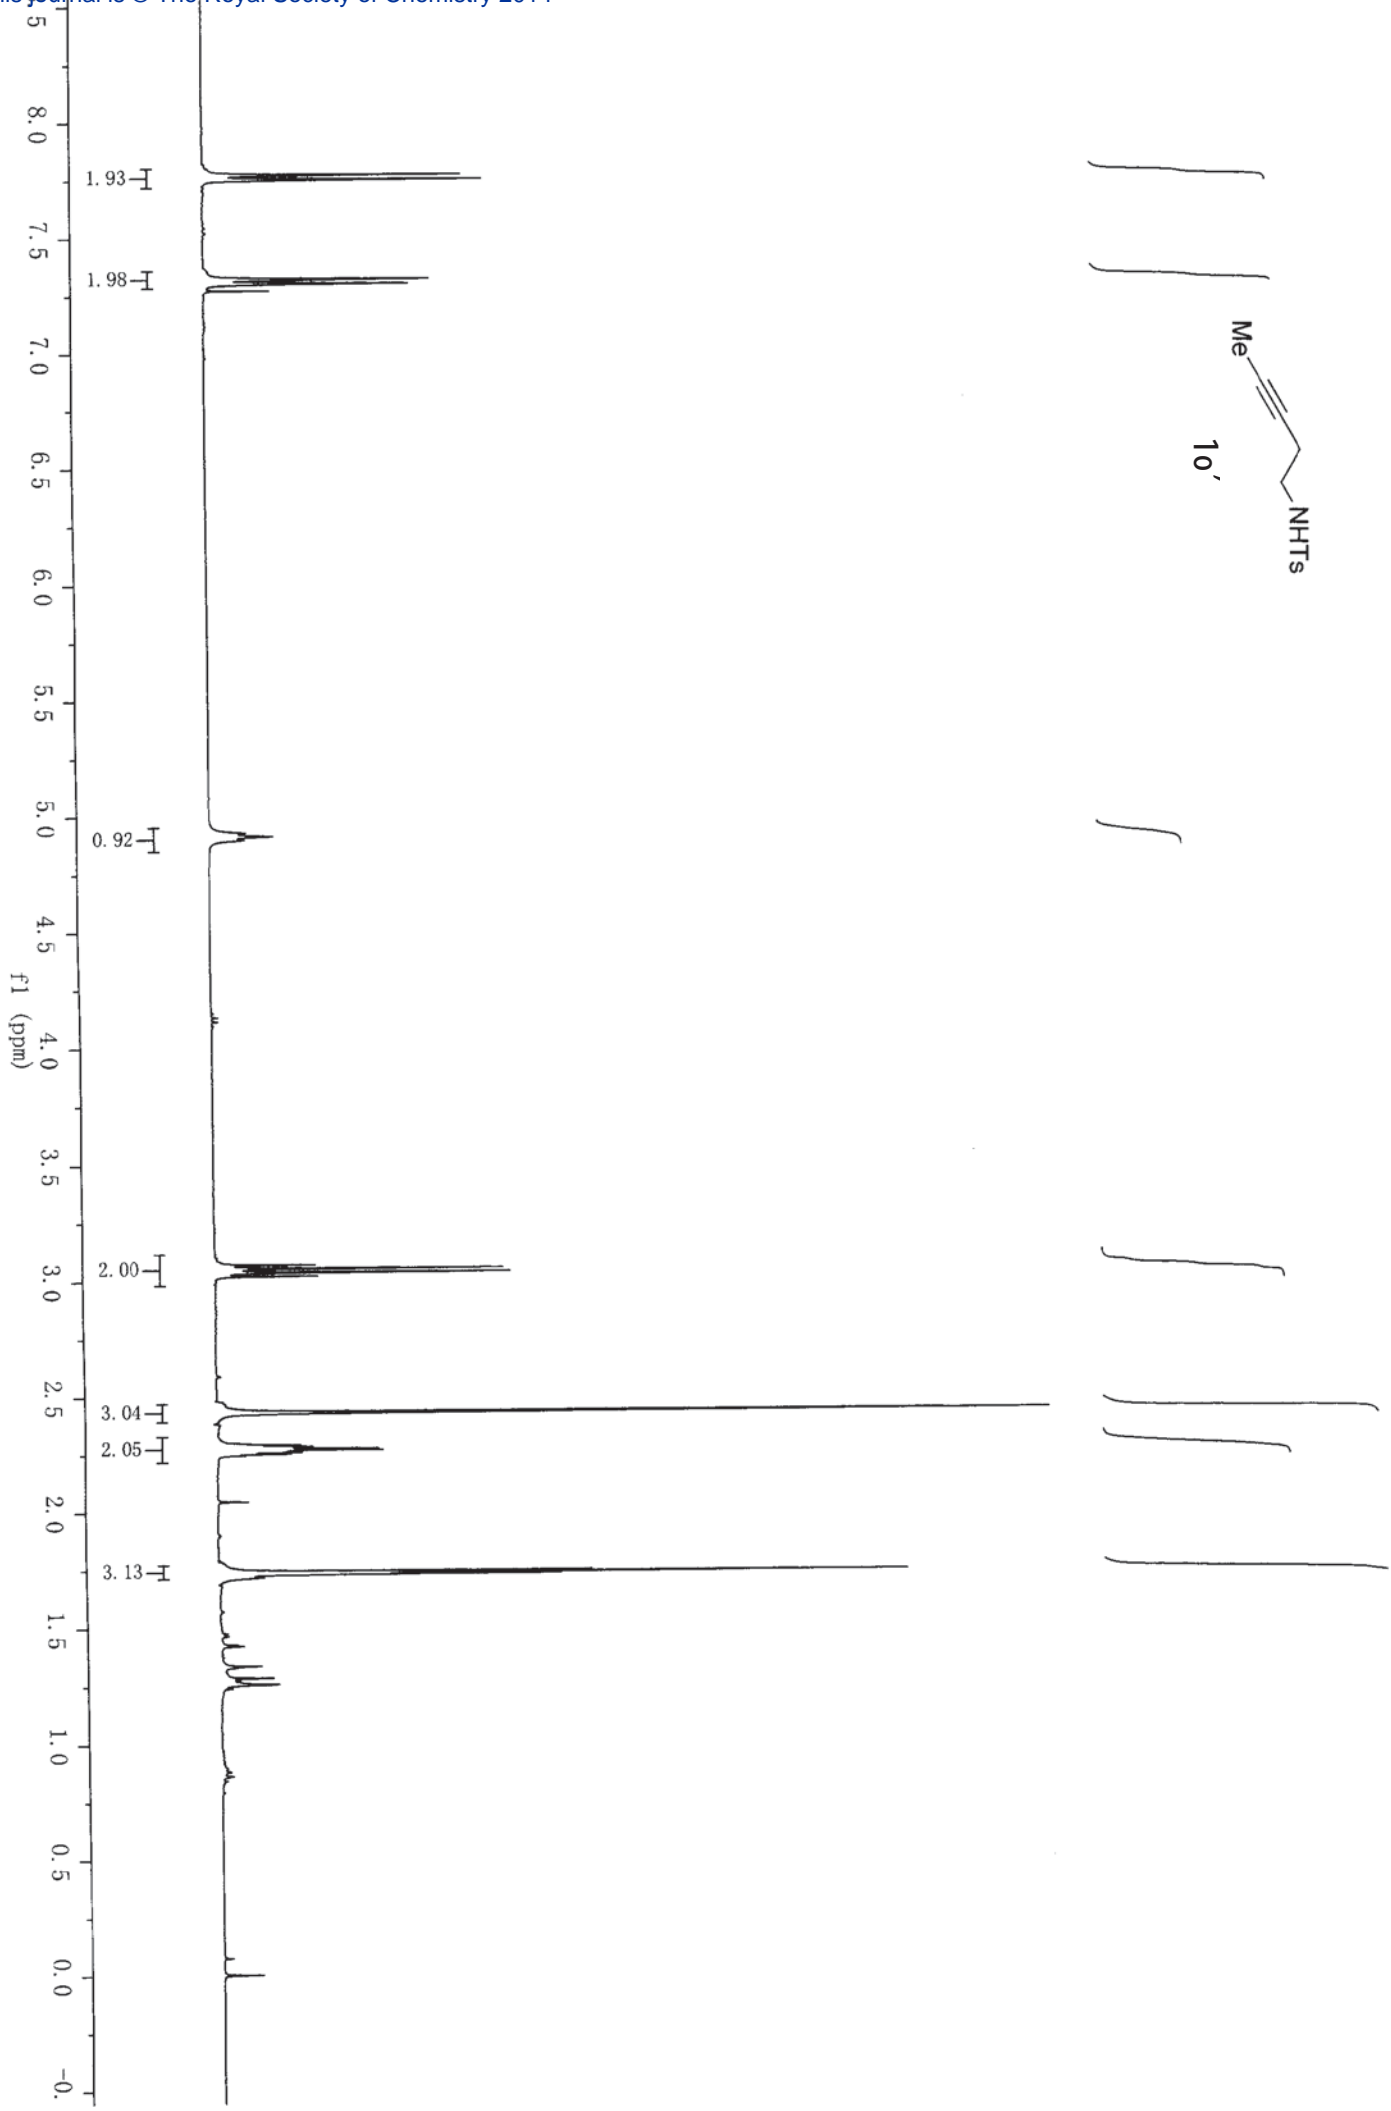

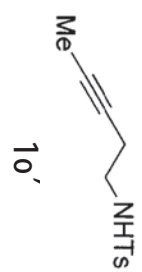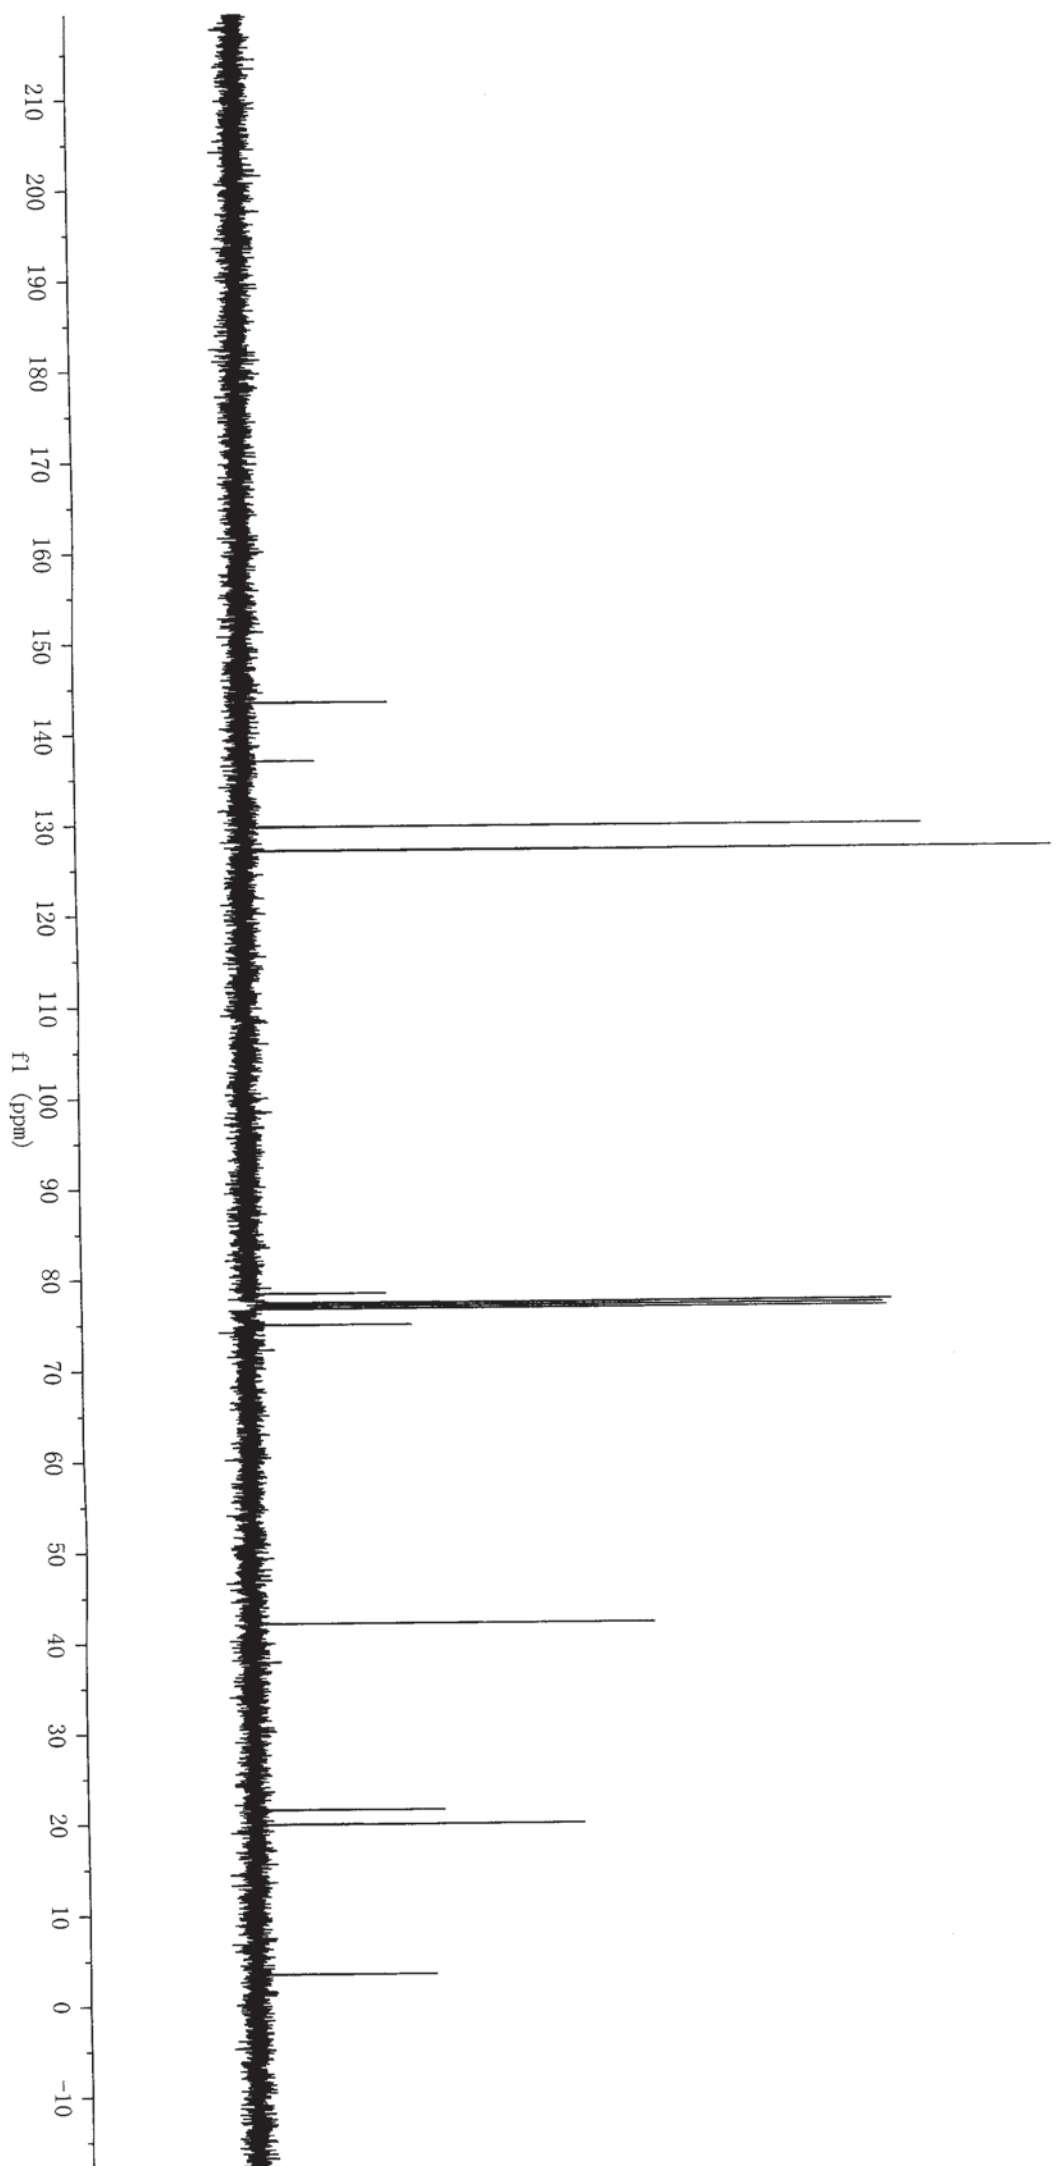

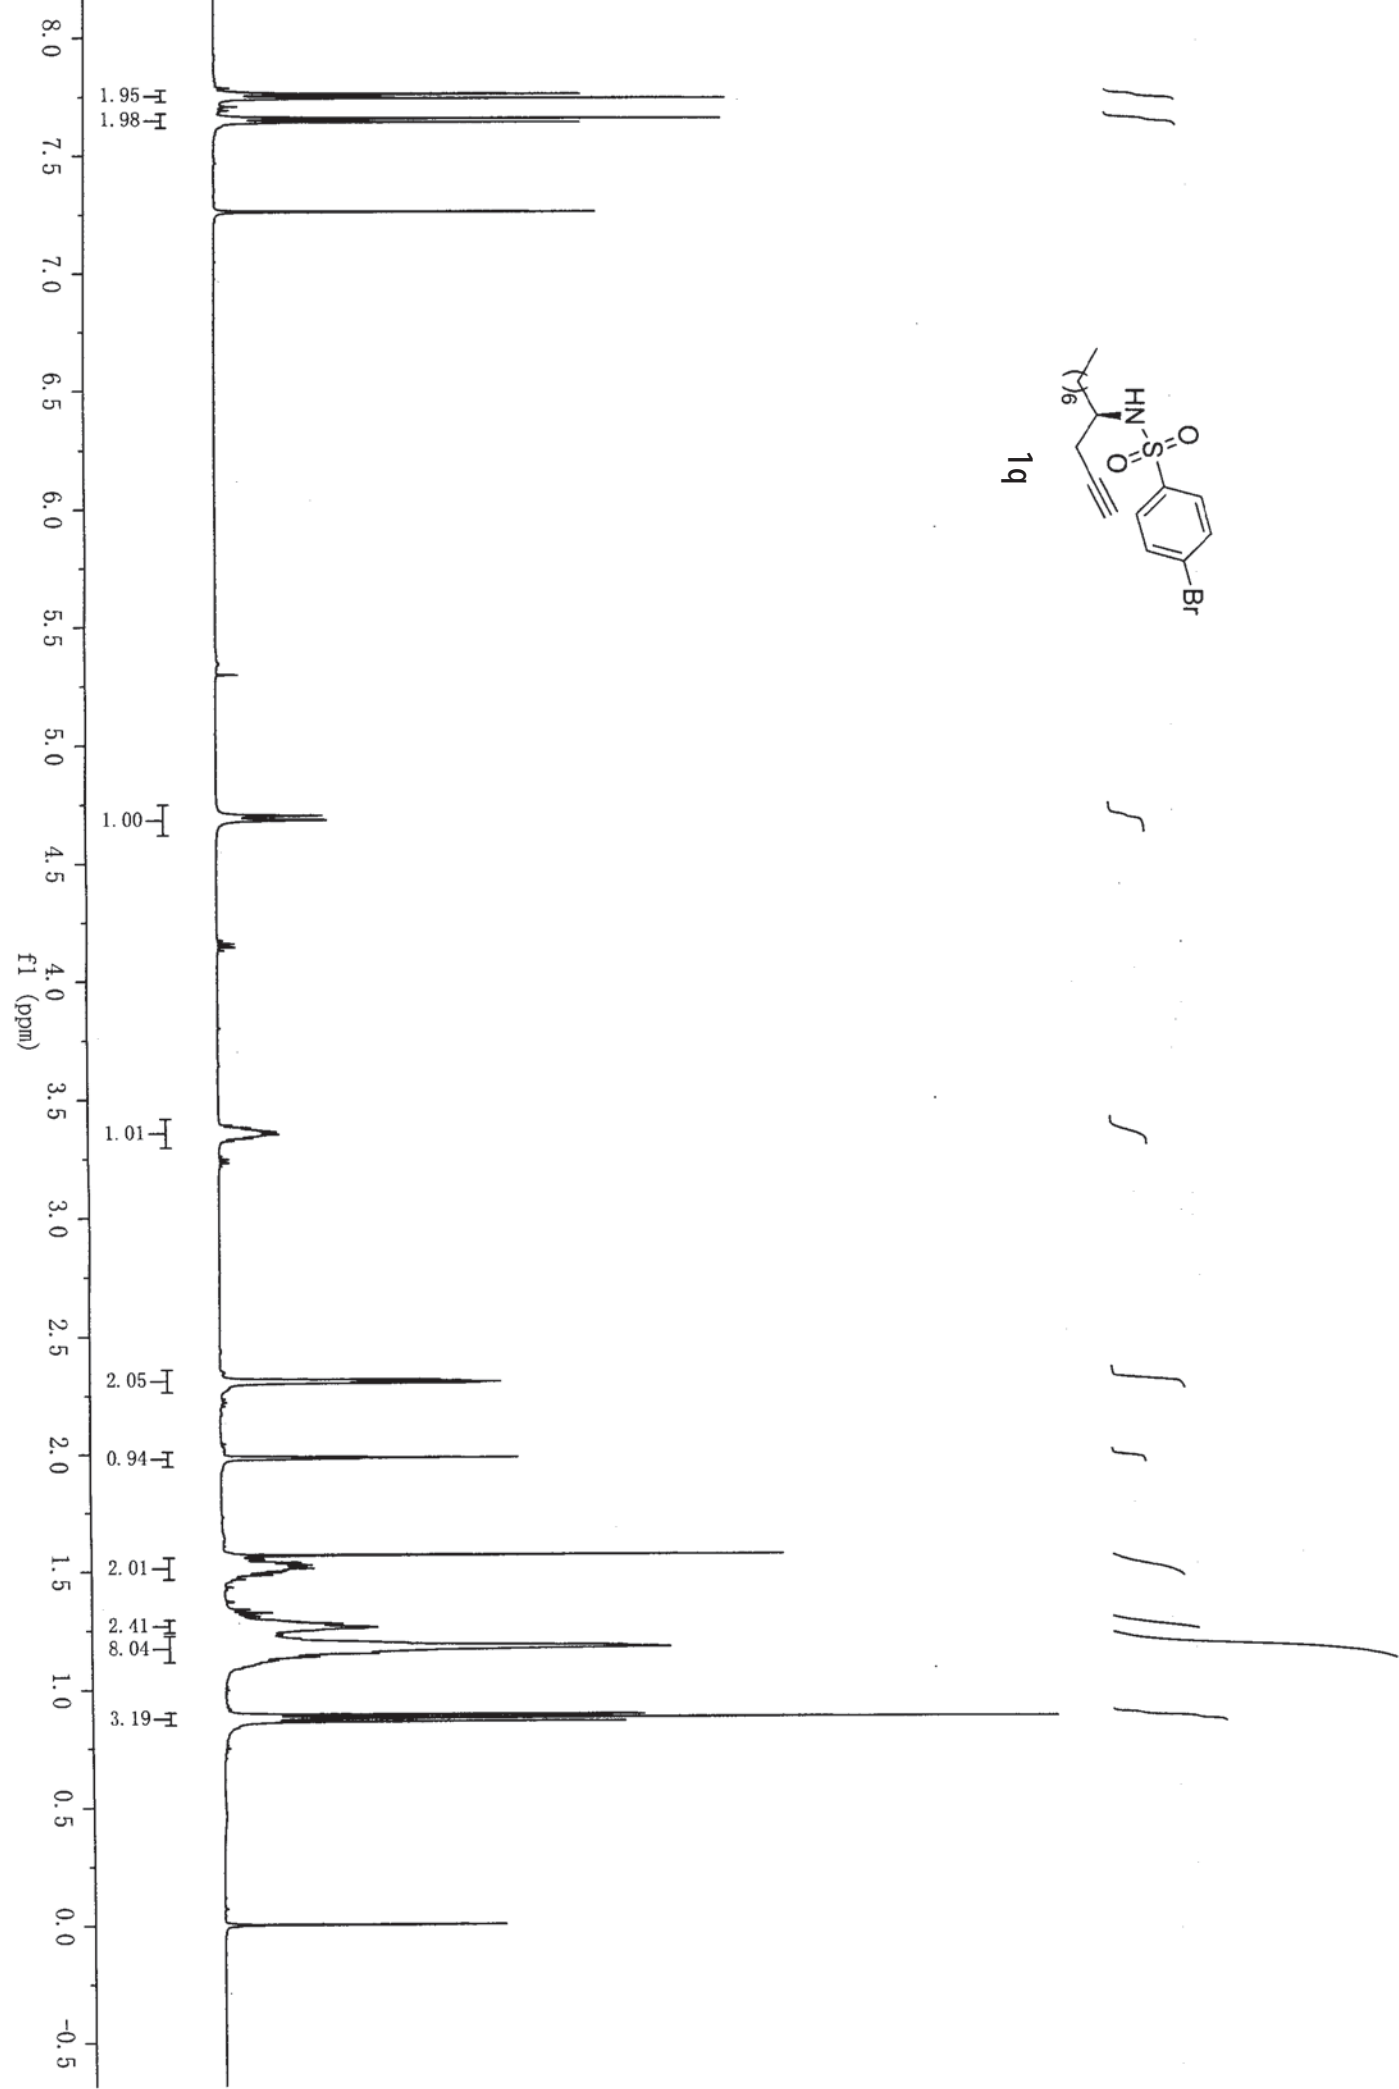

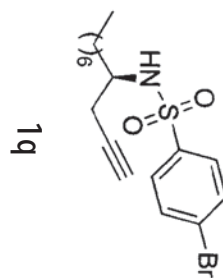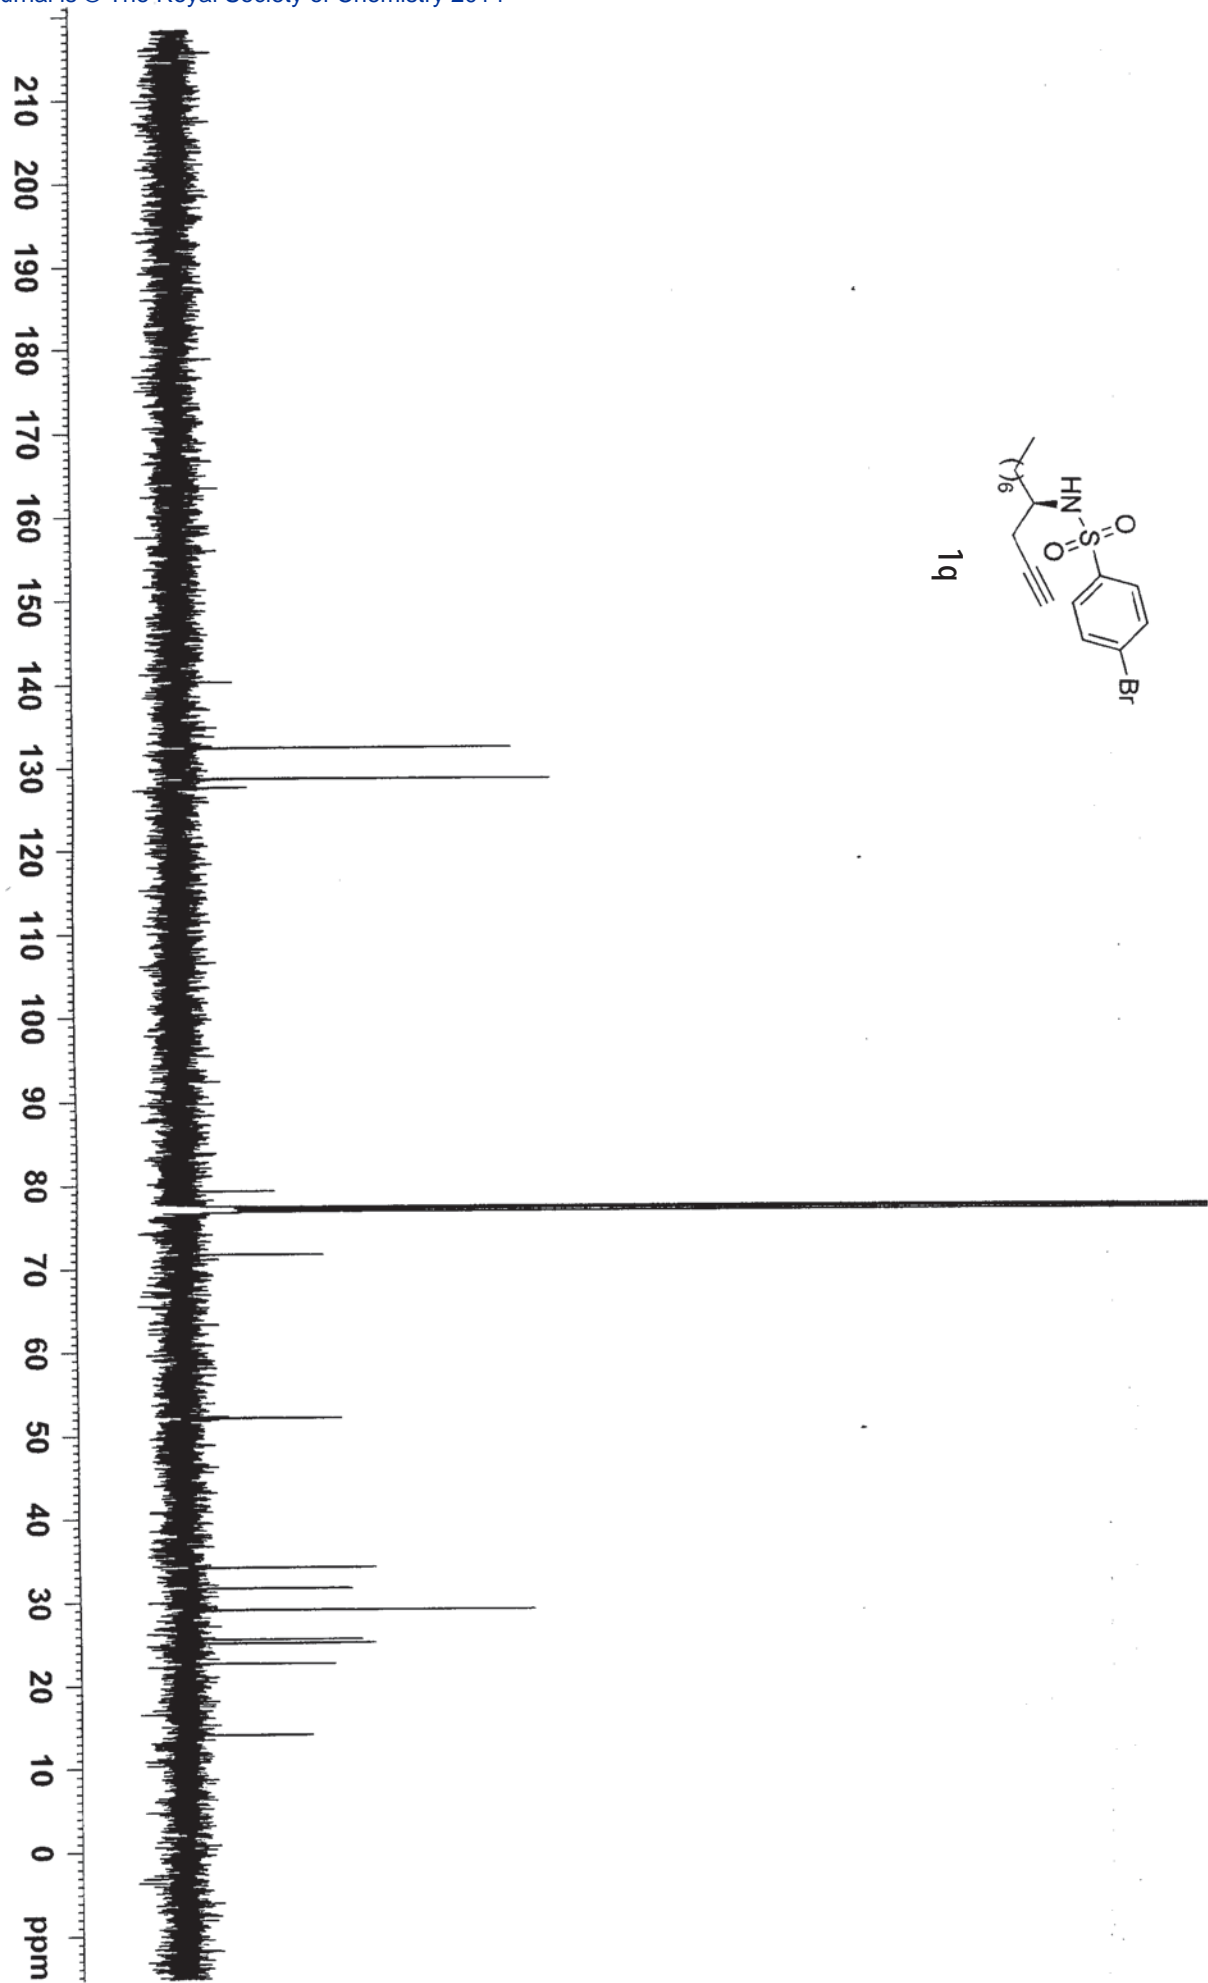

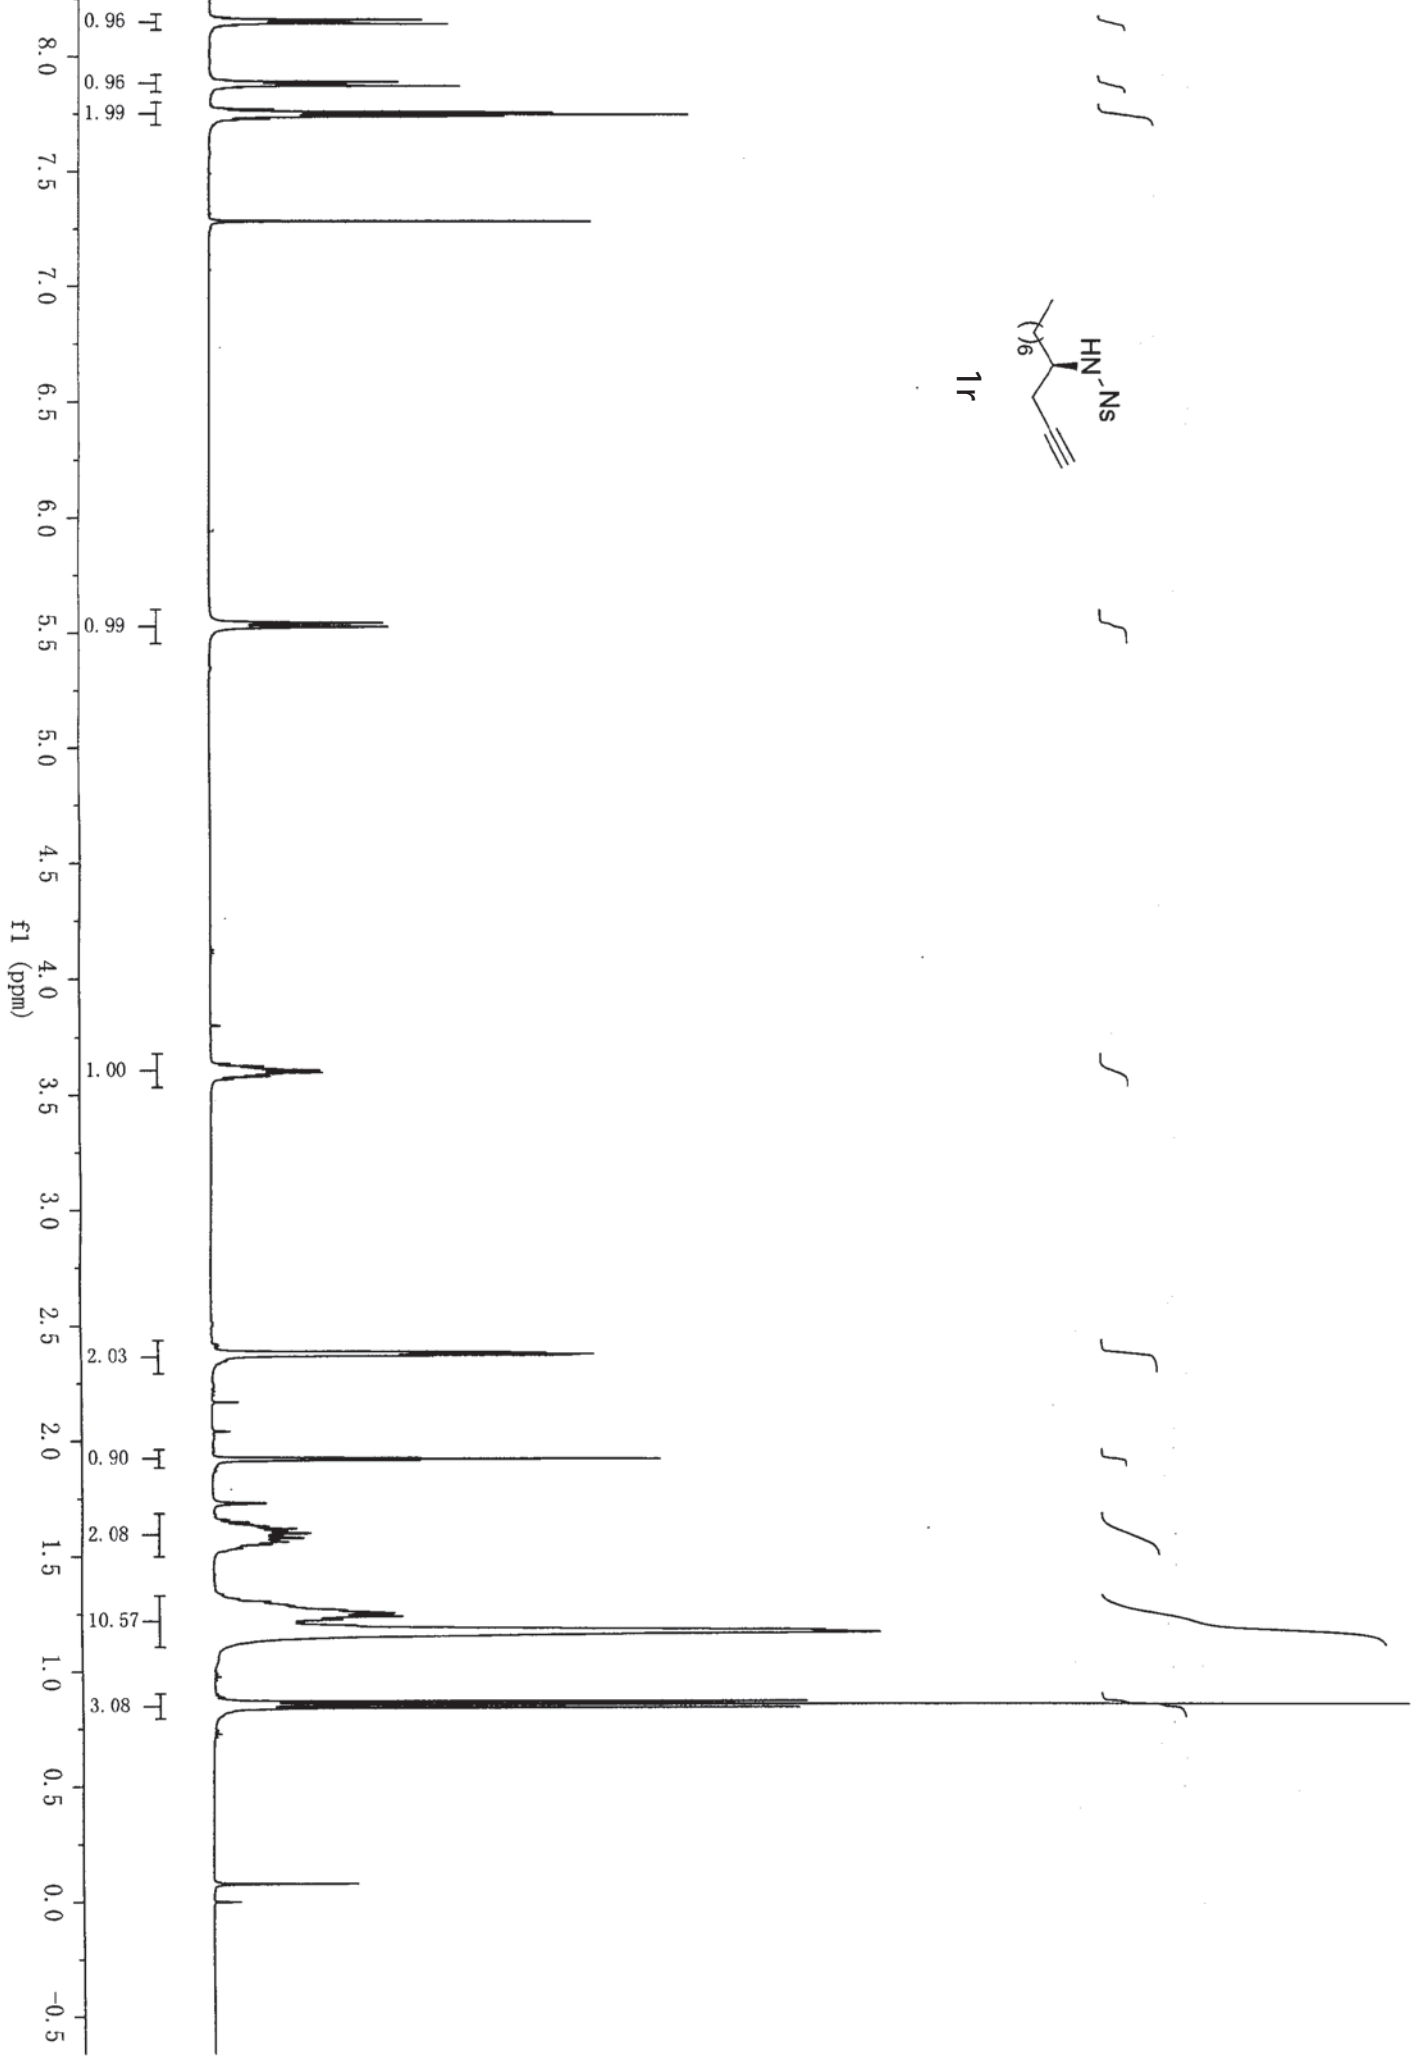



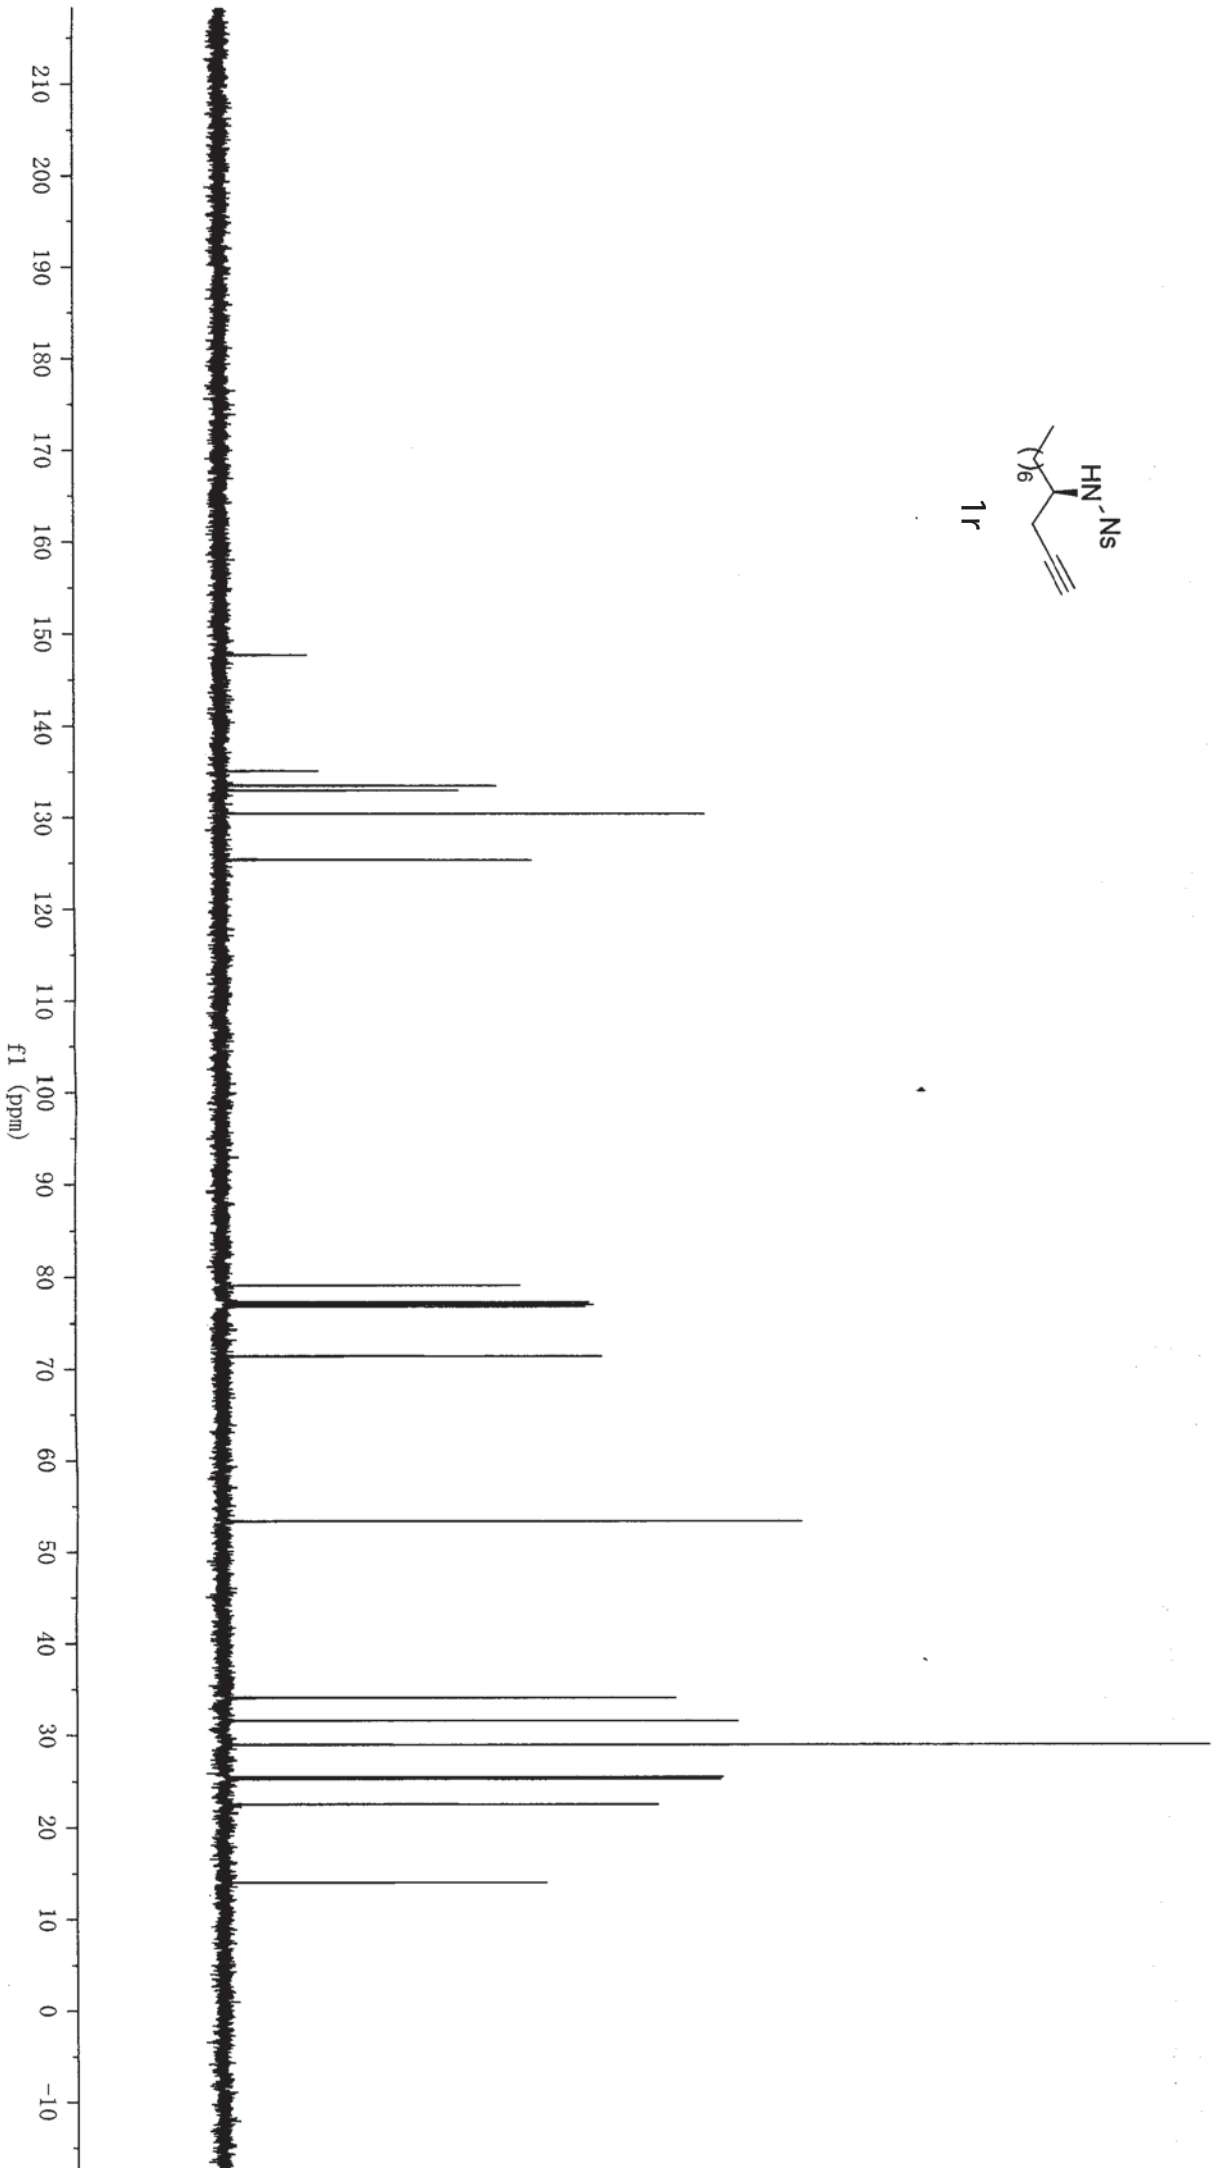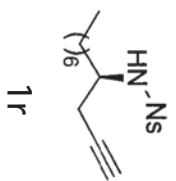

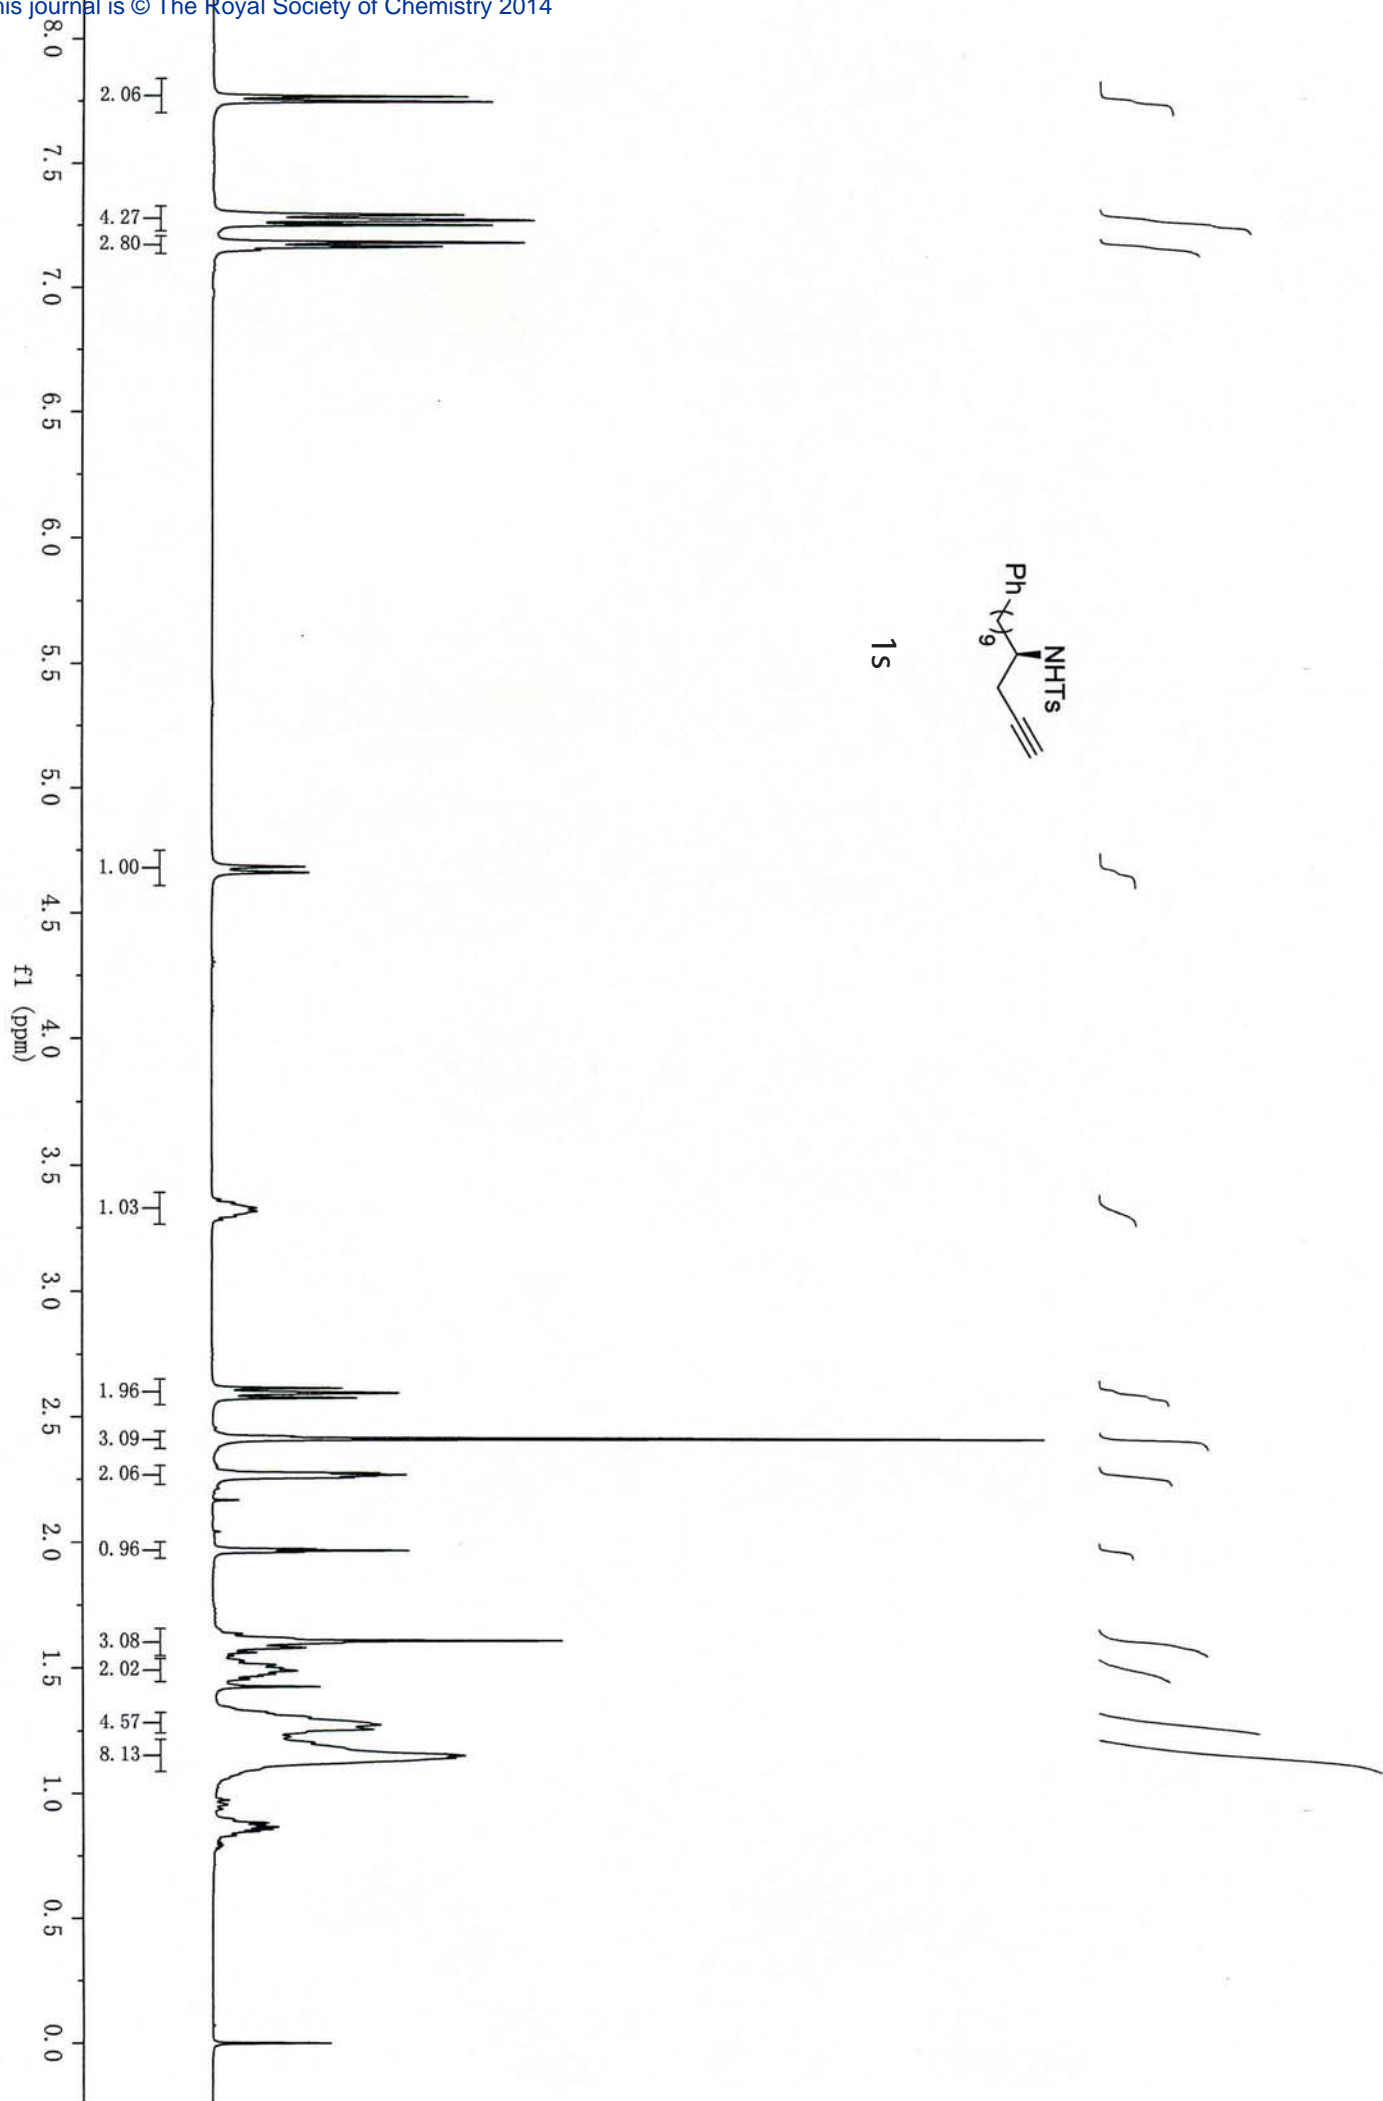

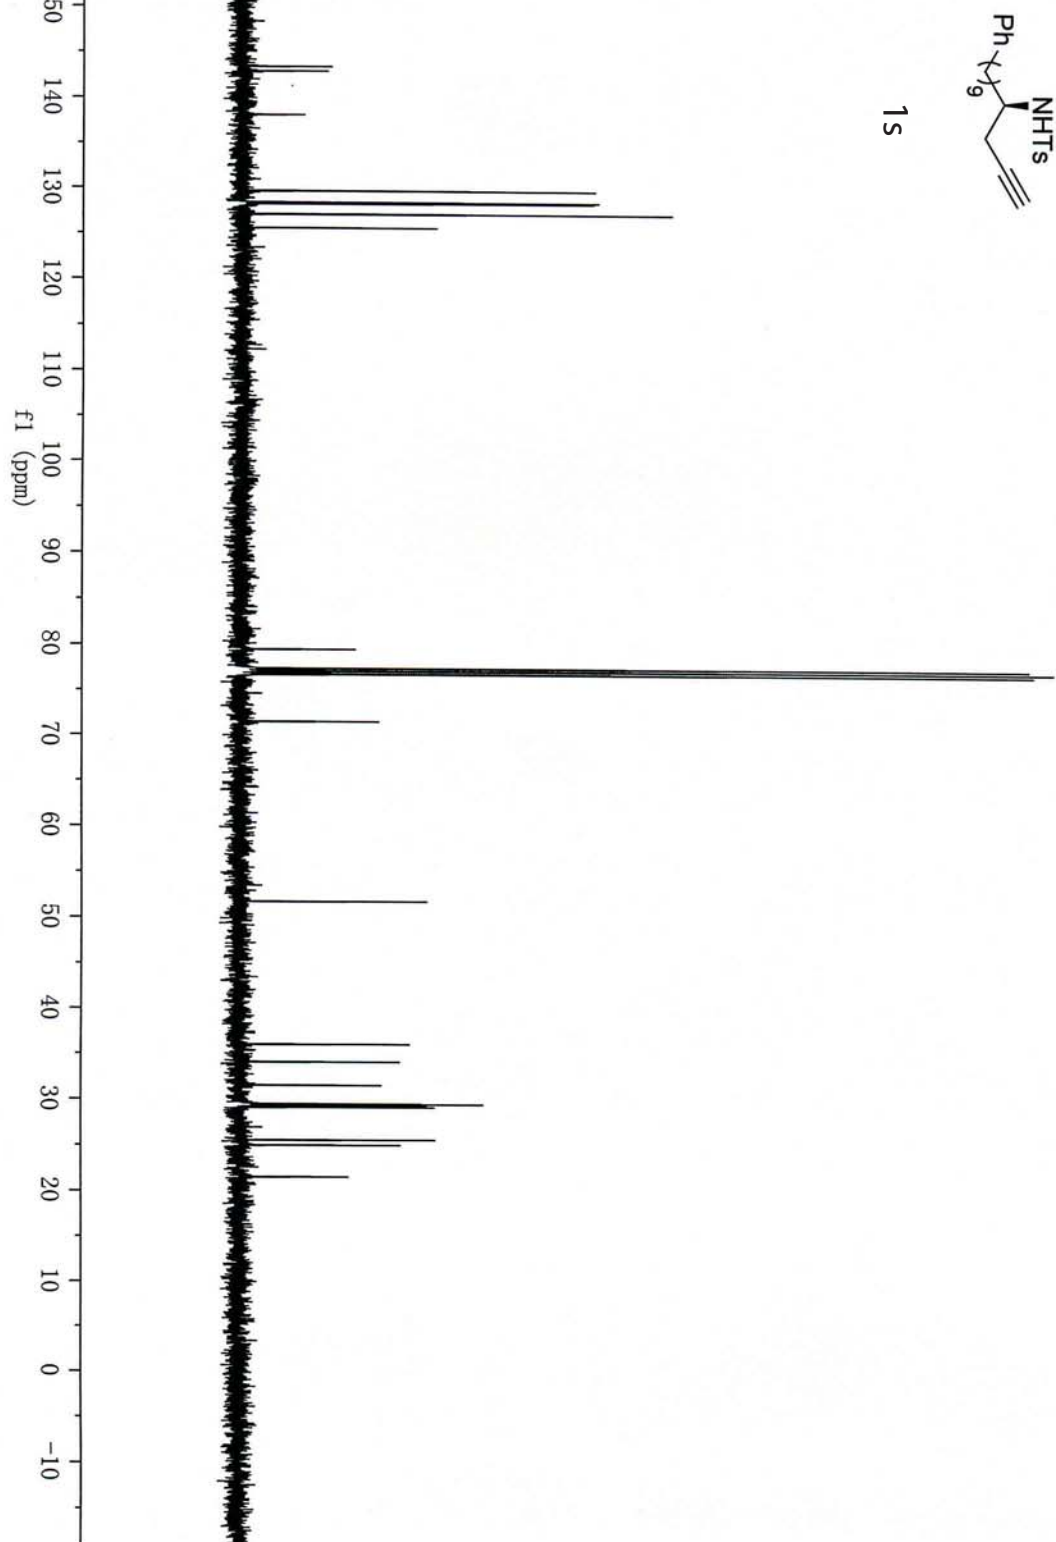

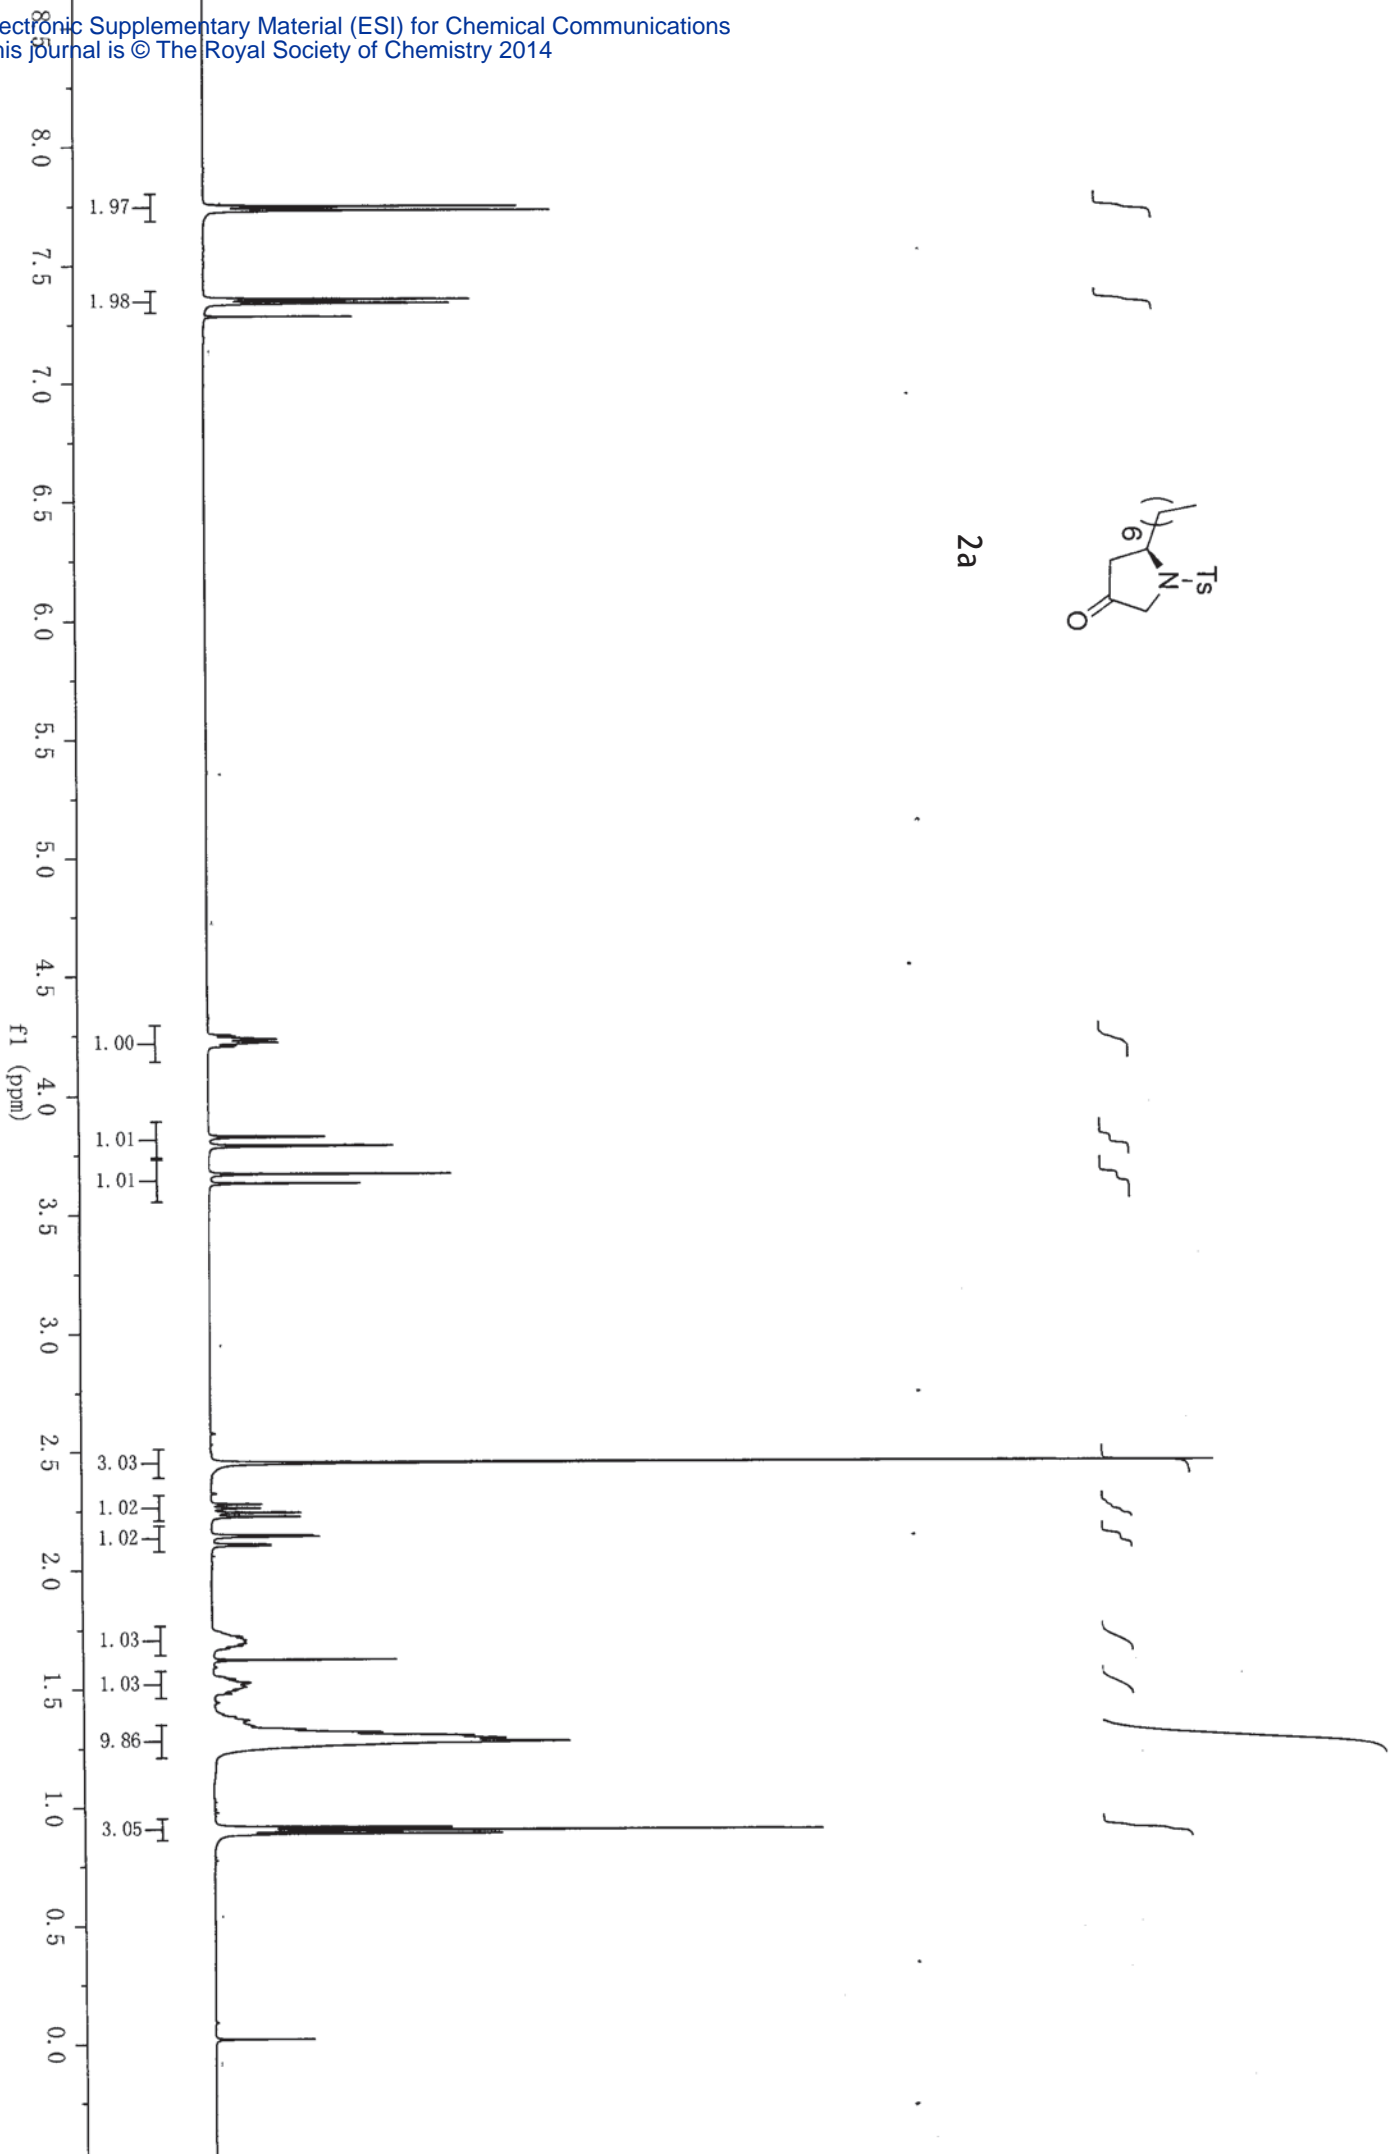

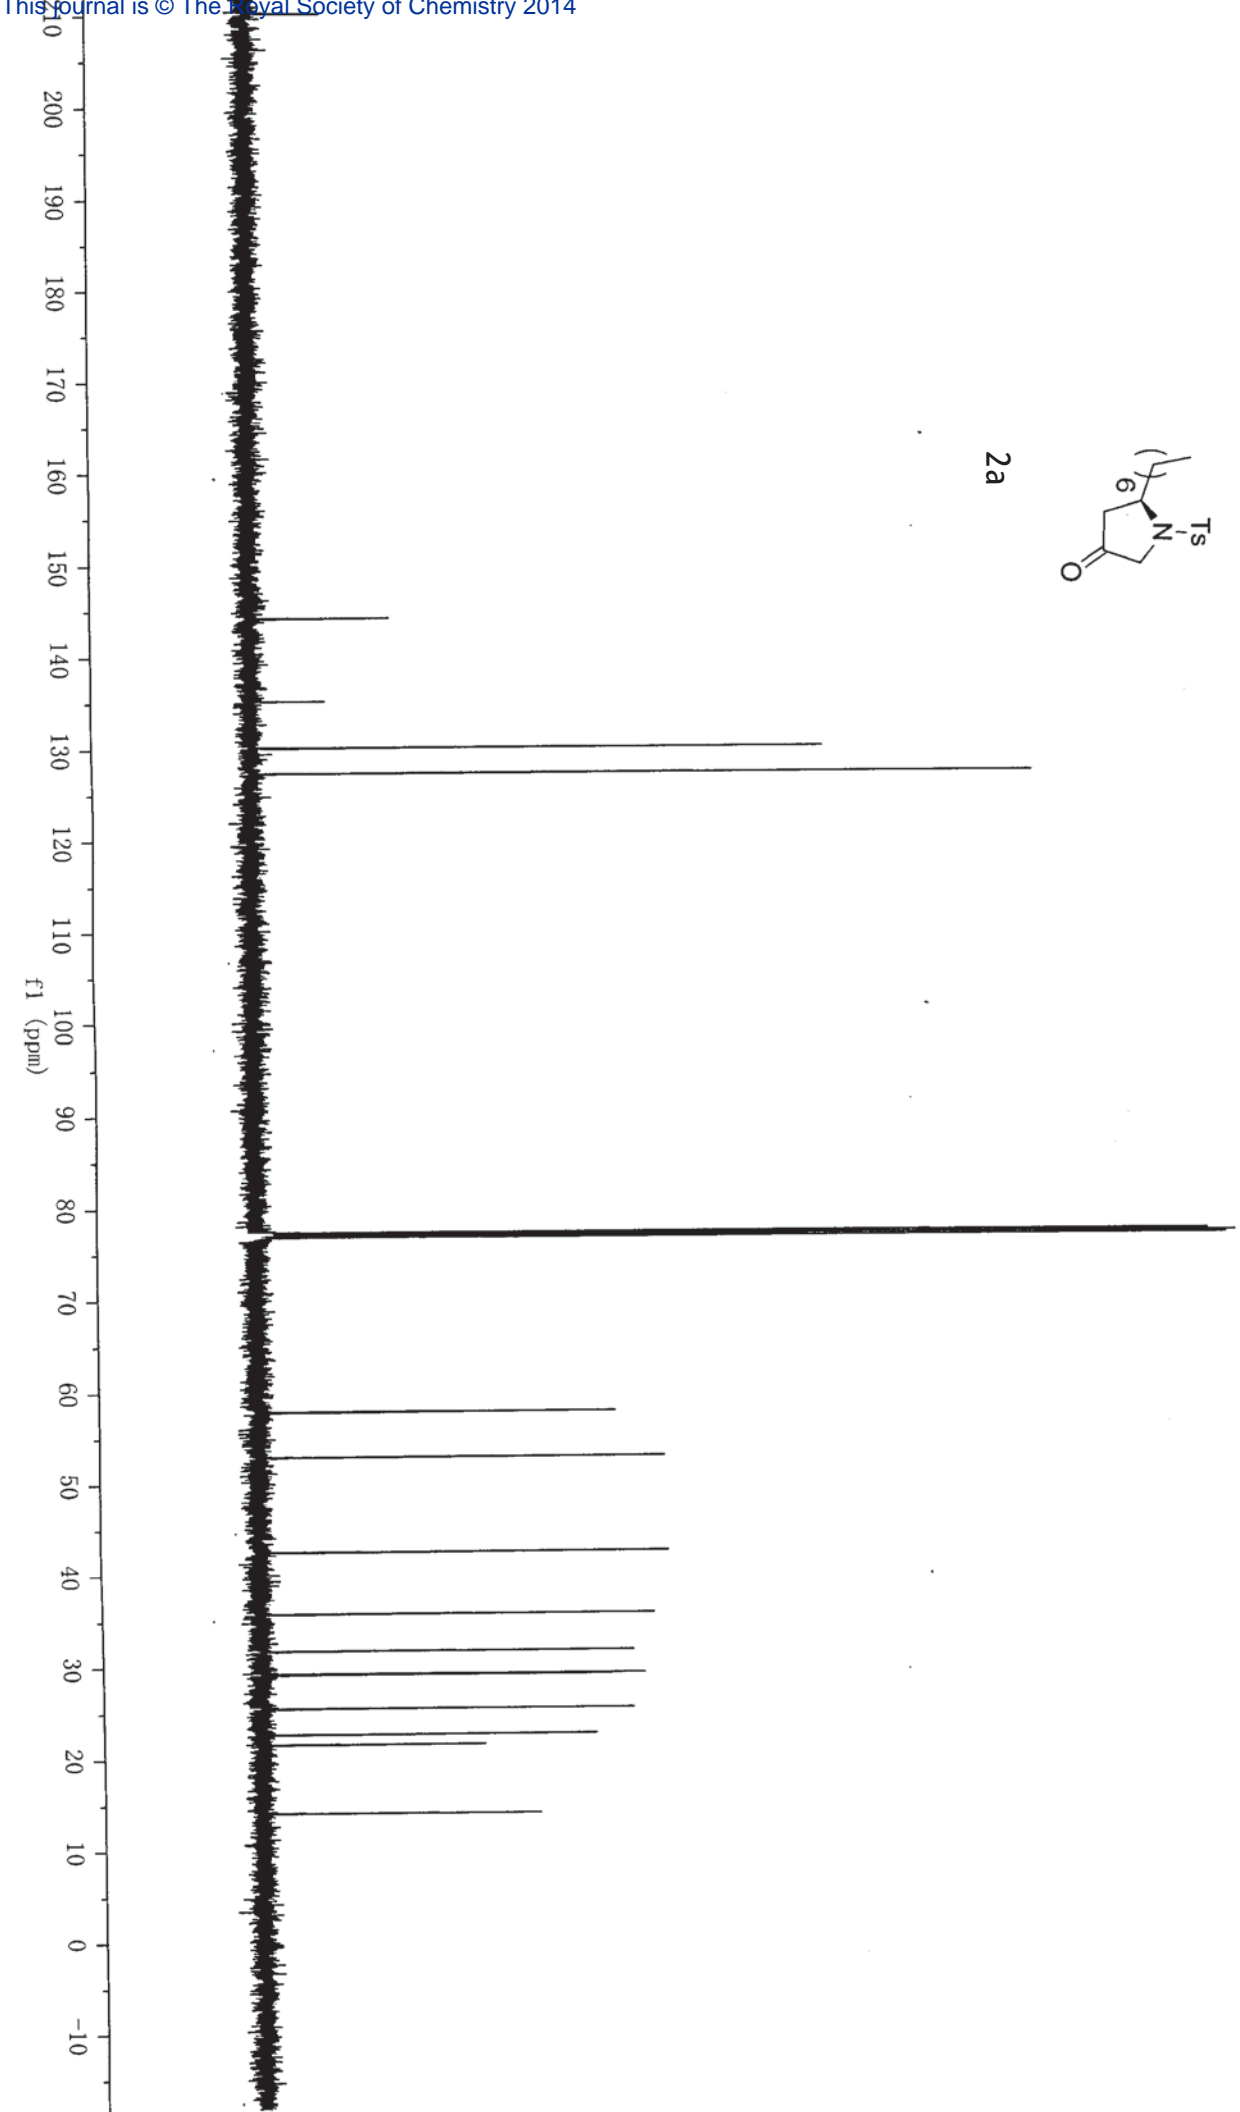

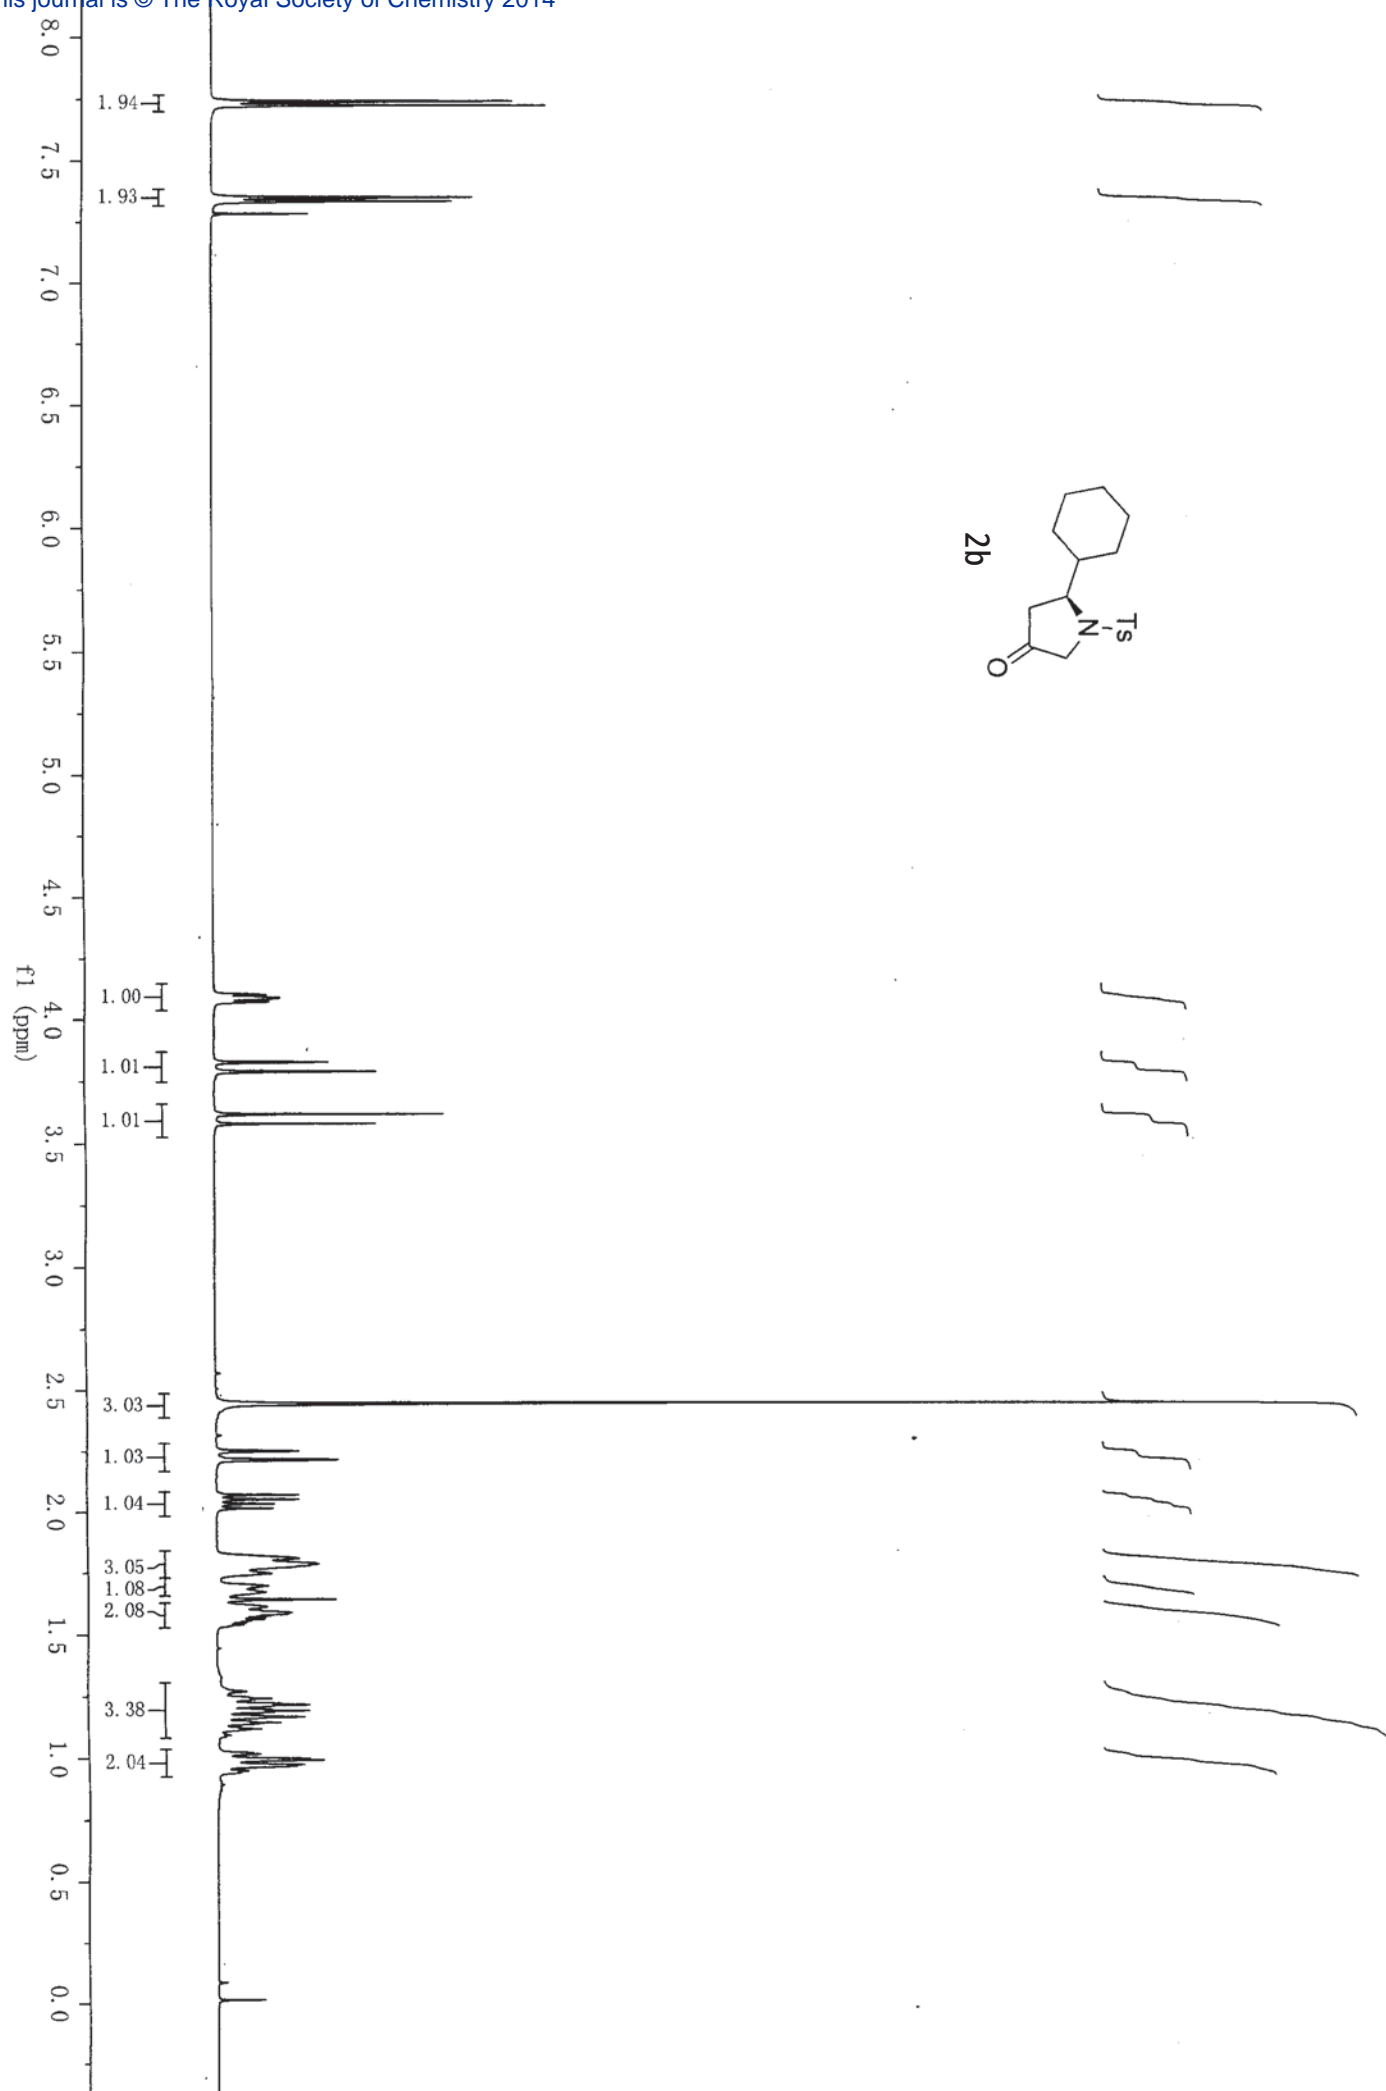

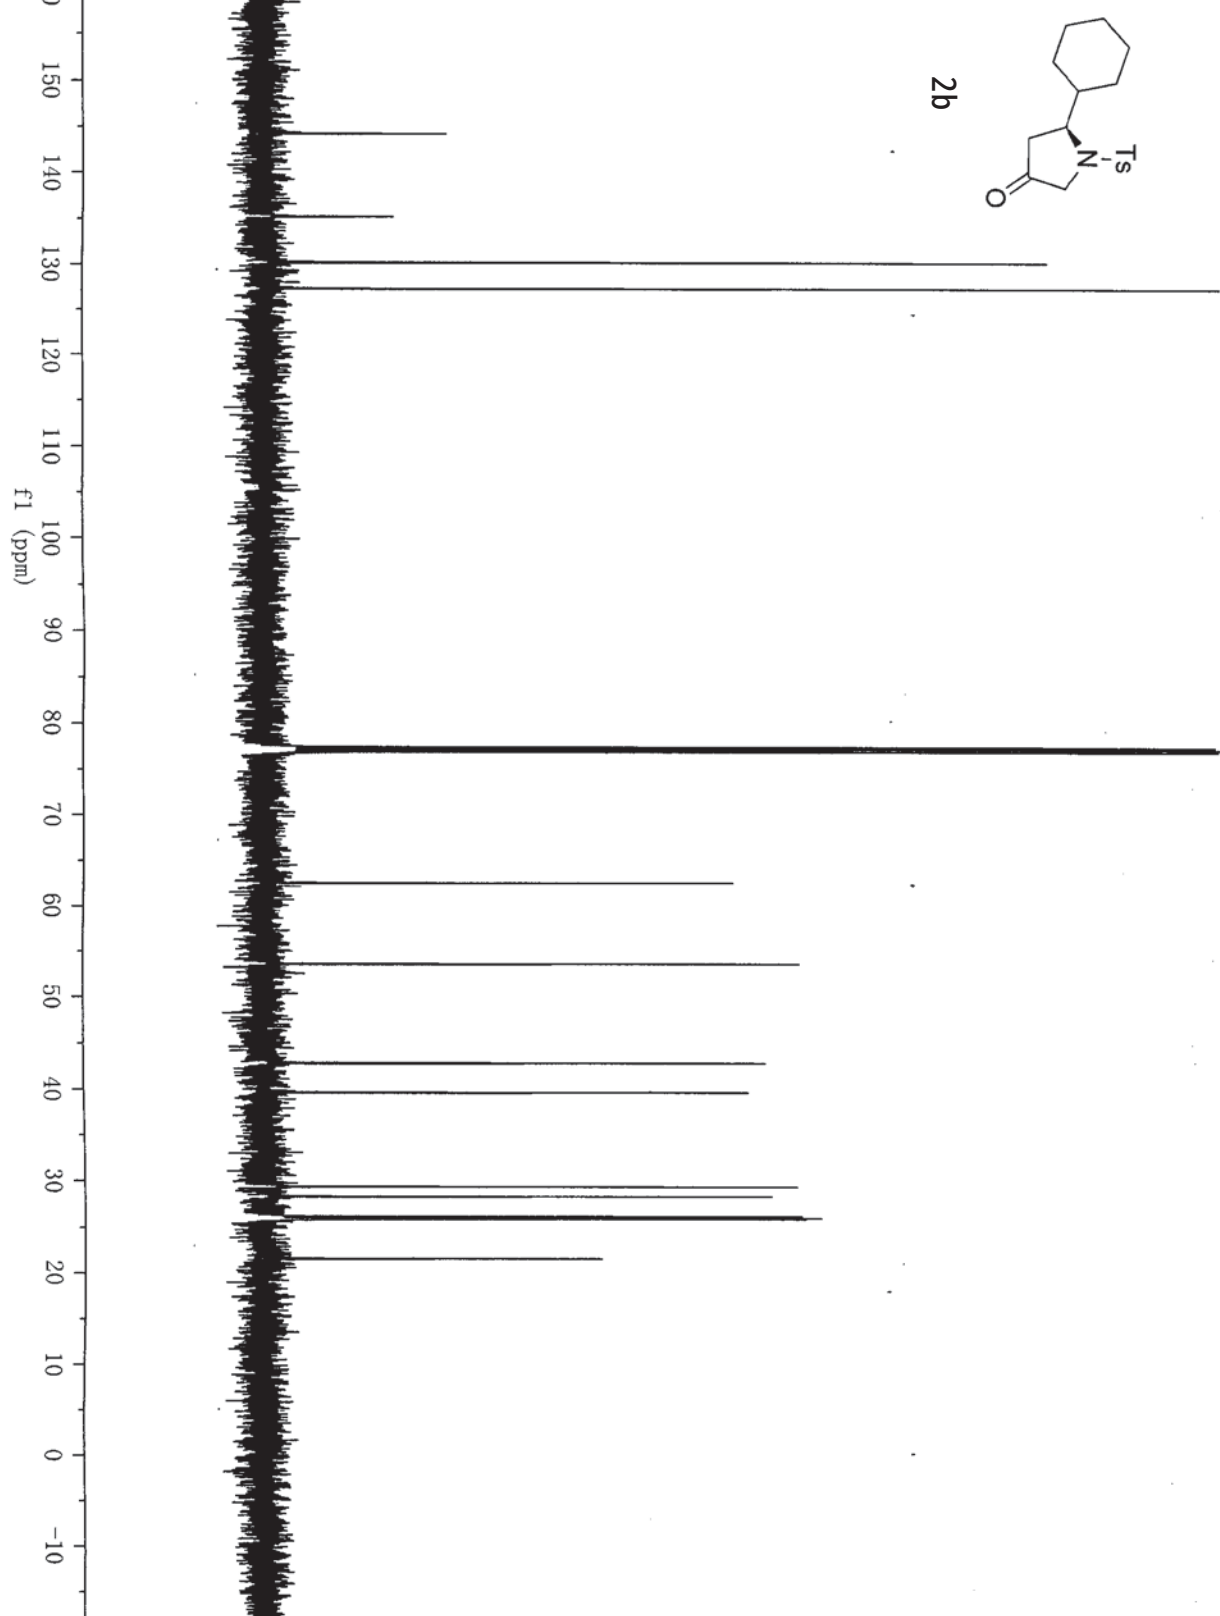

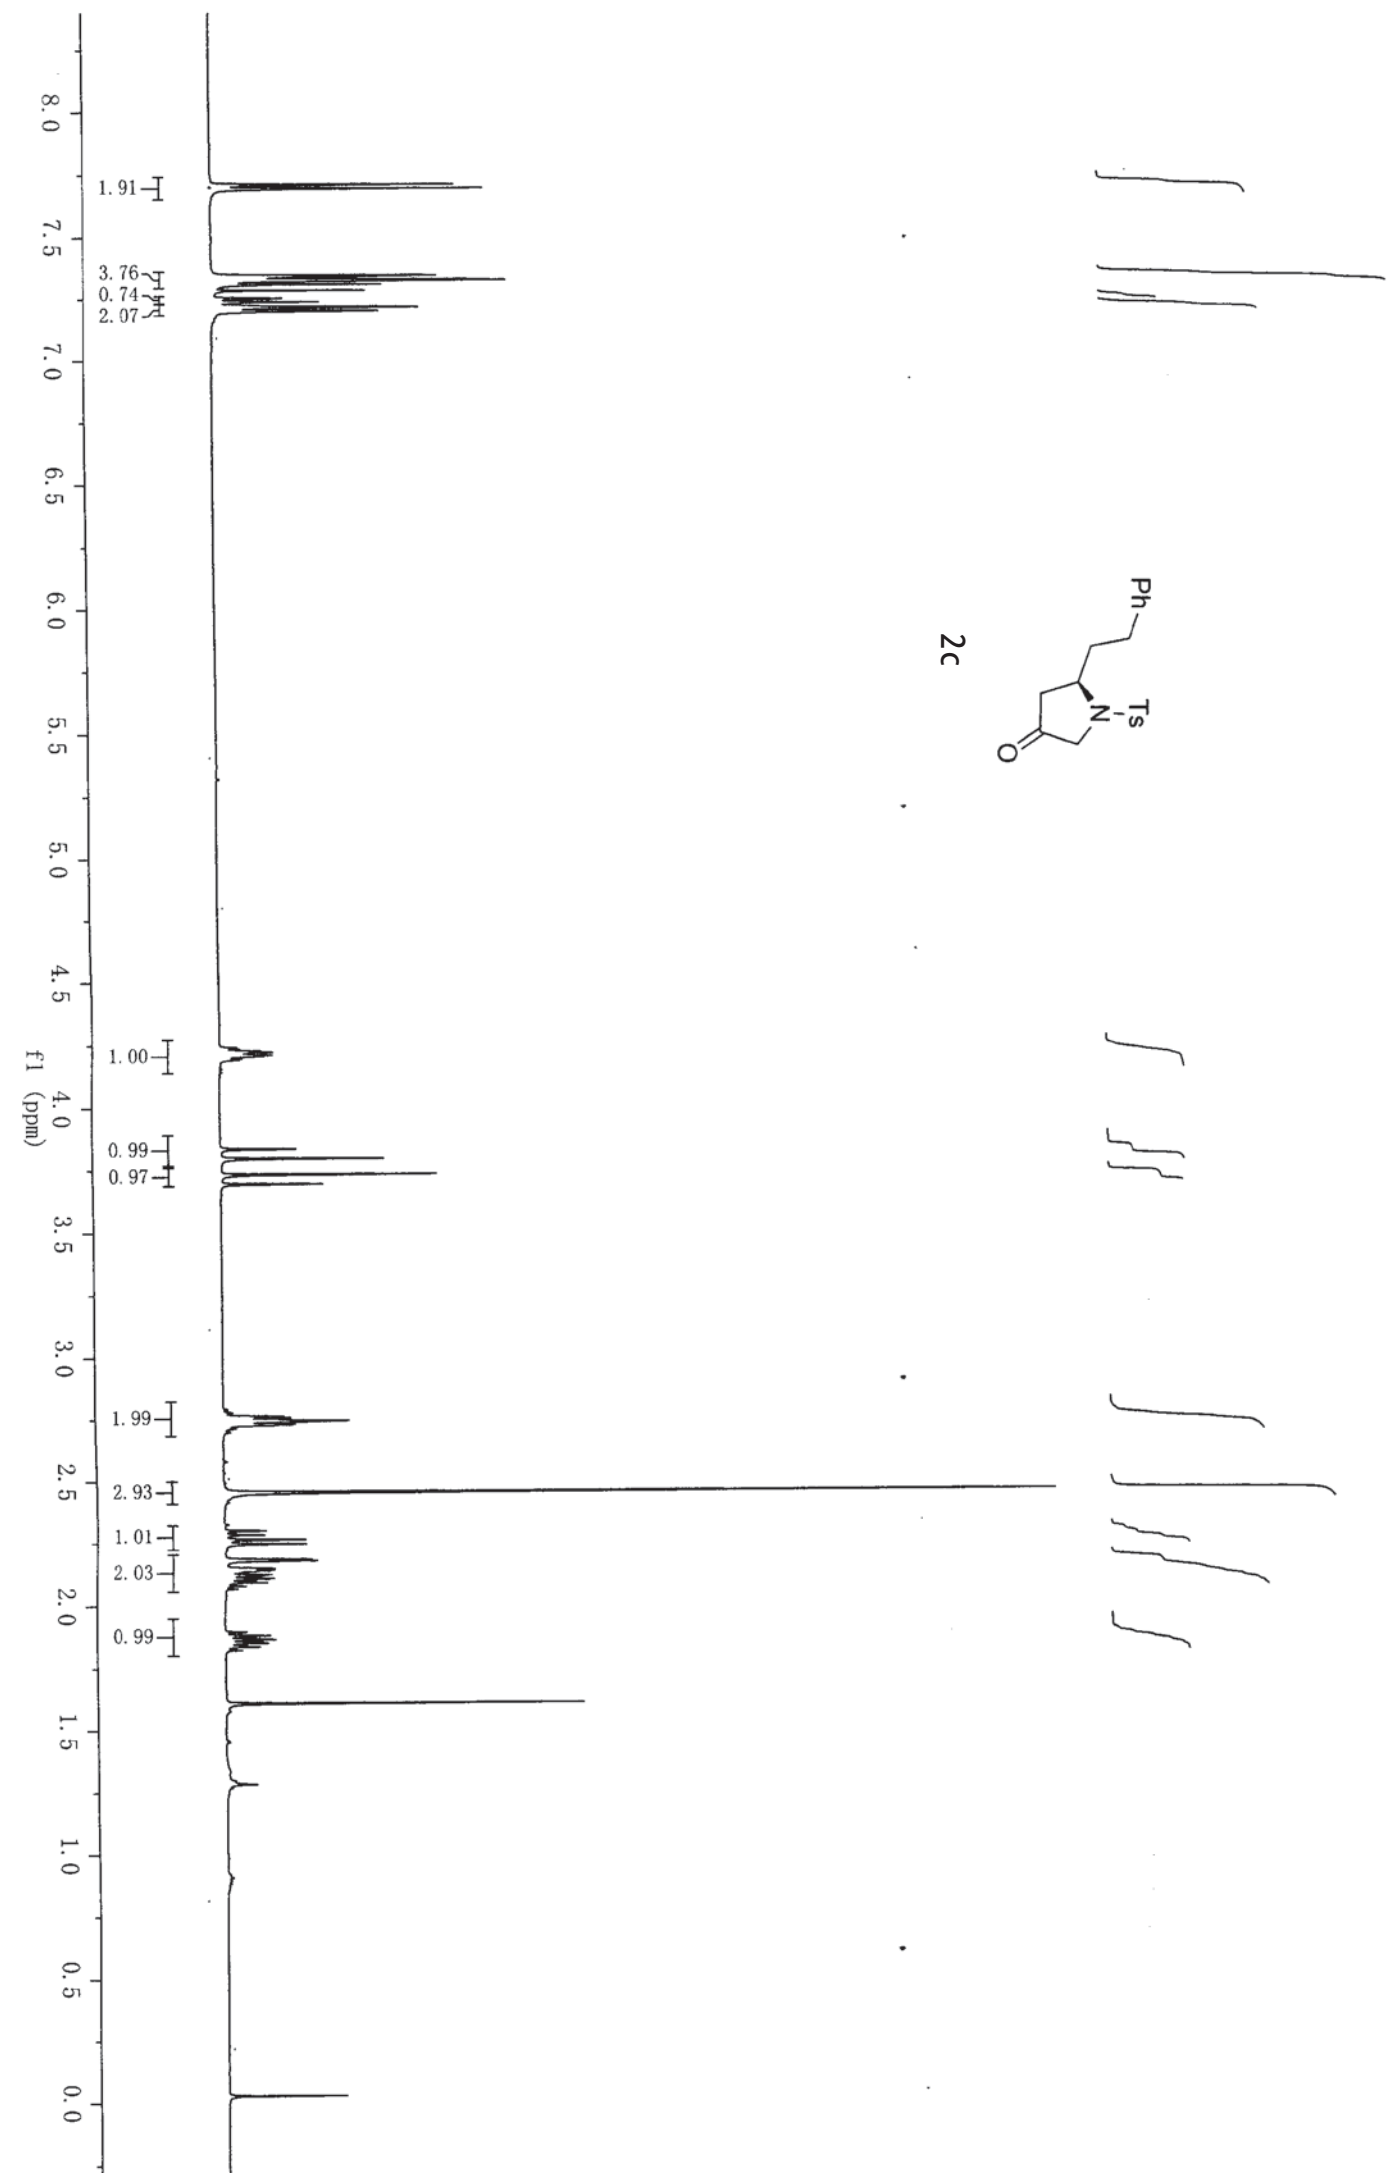



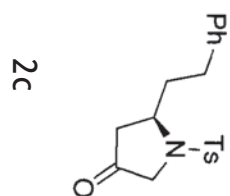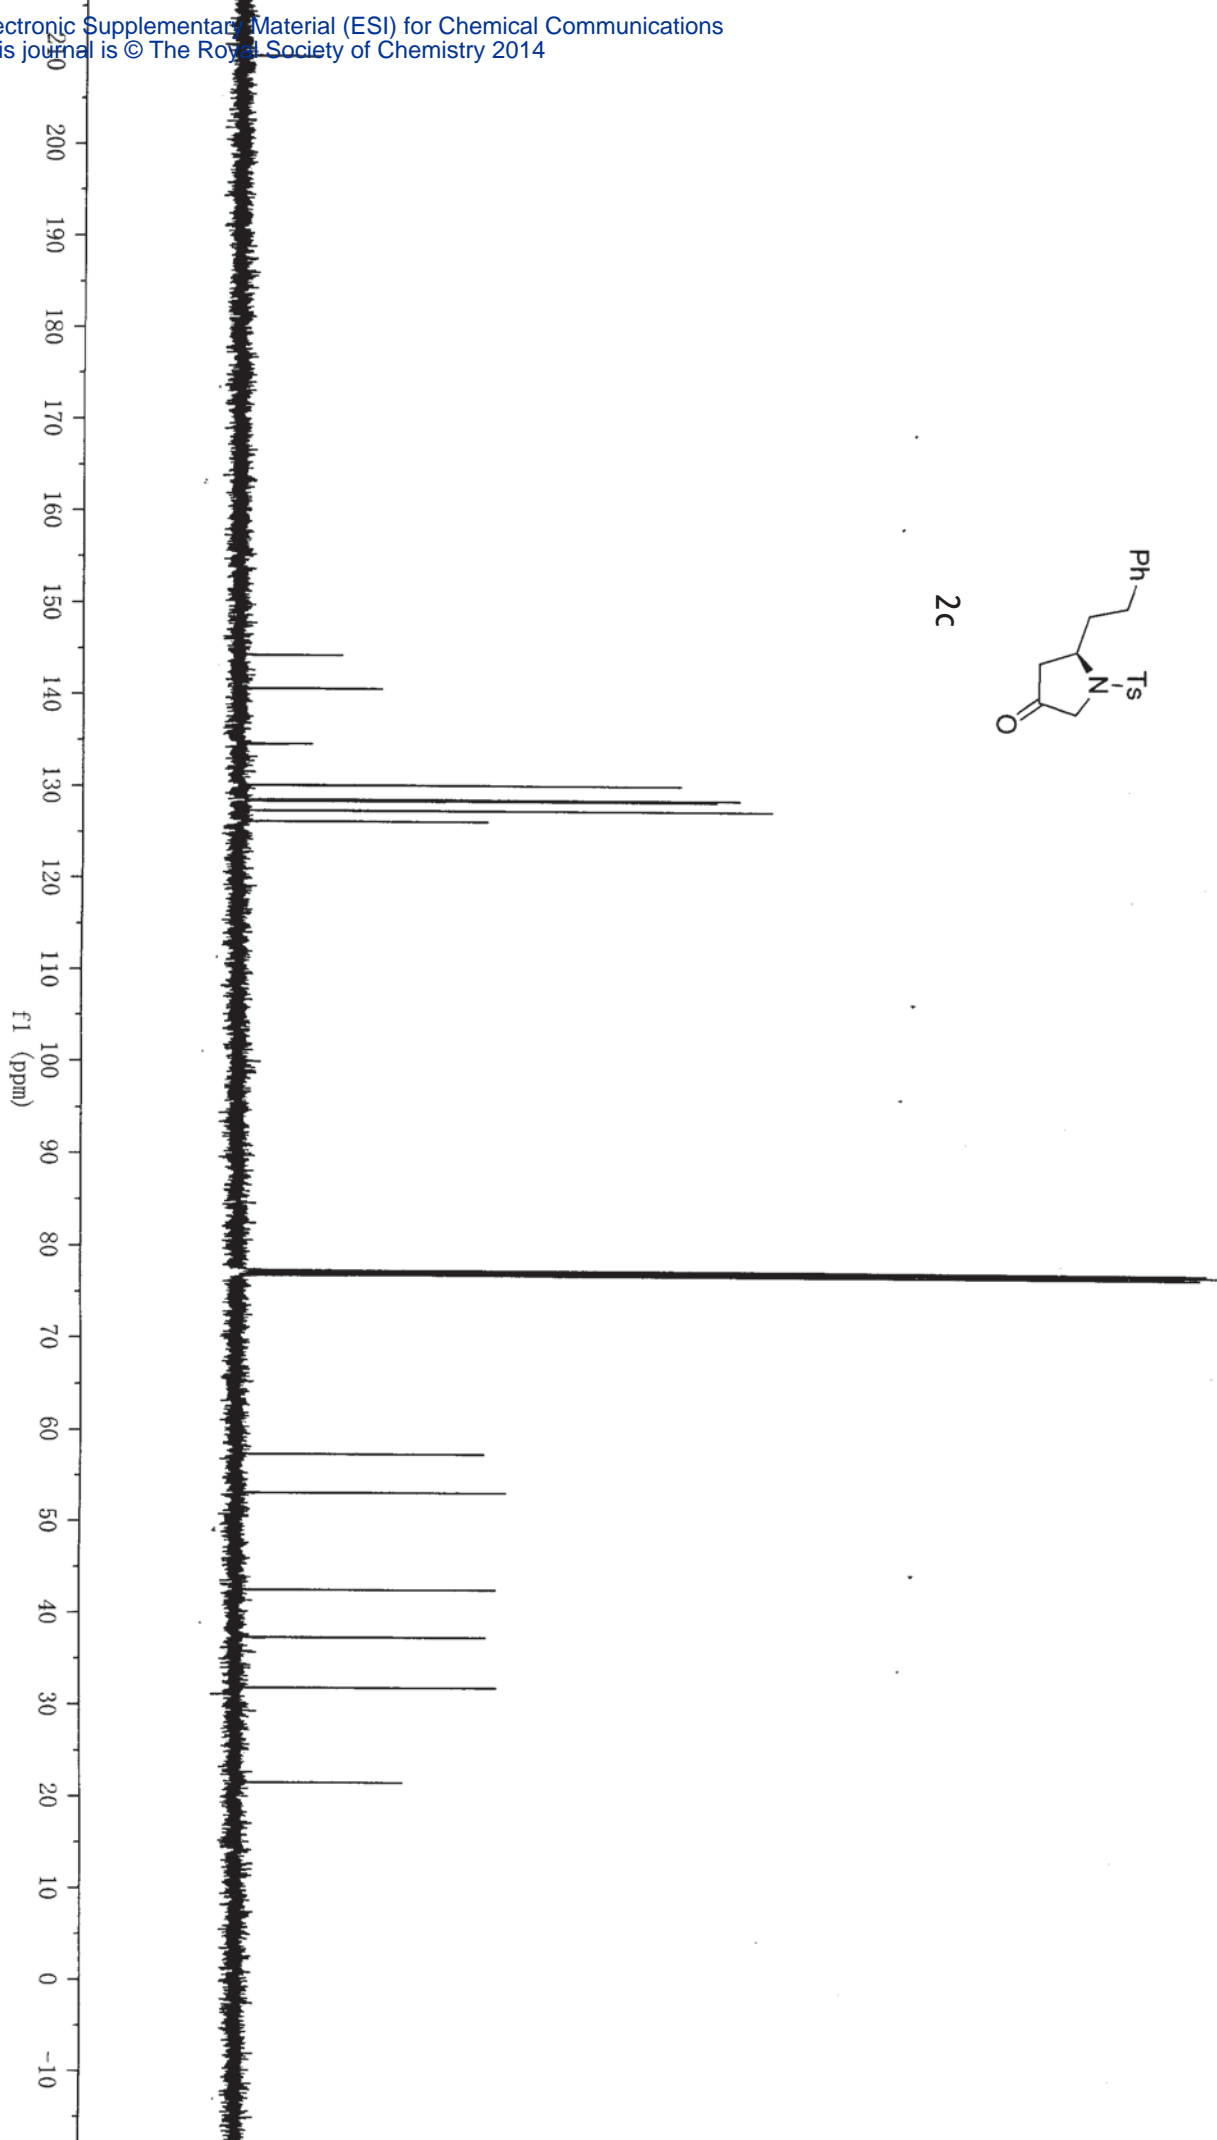

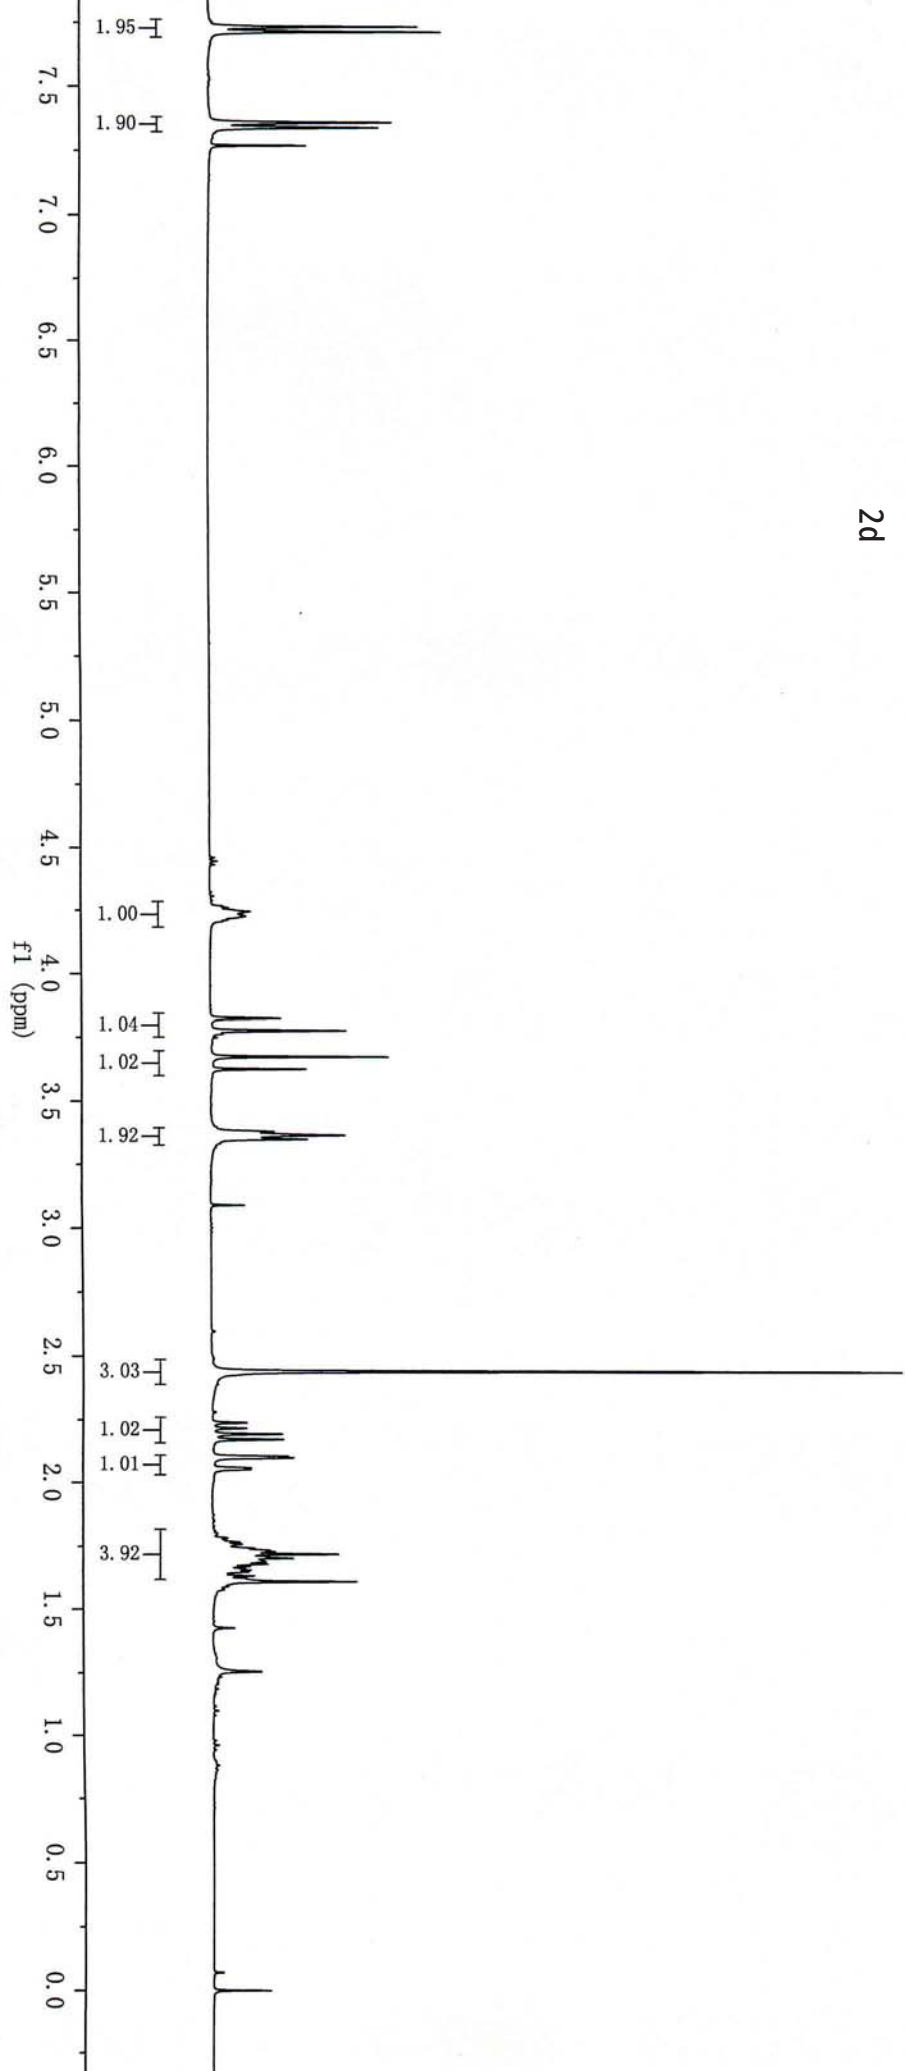

2d

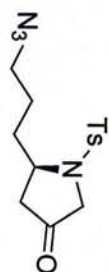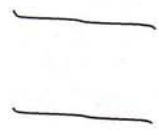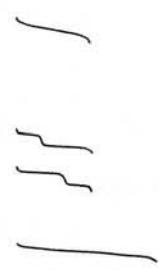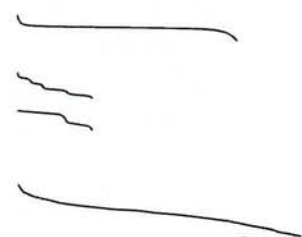

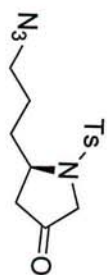

2d

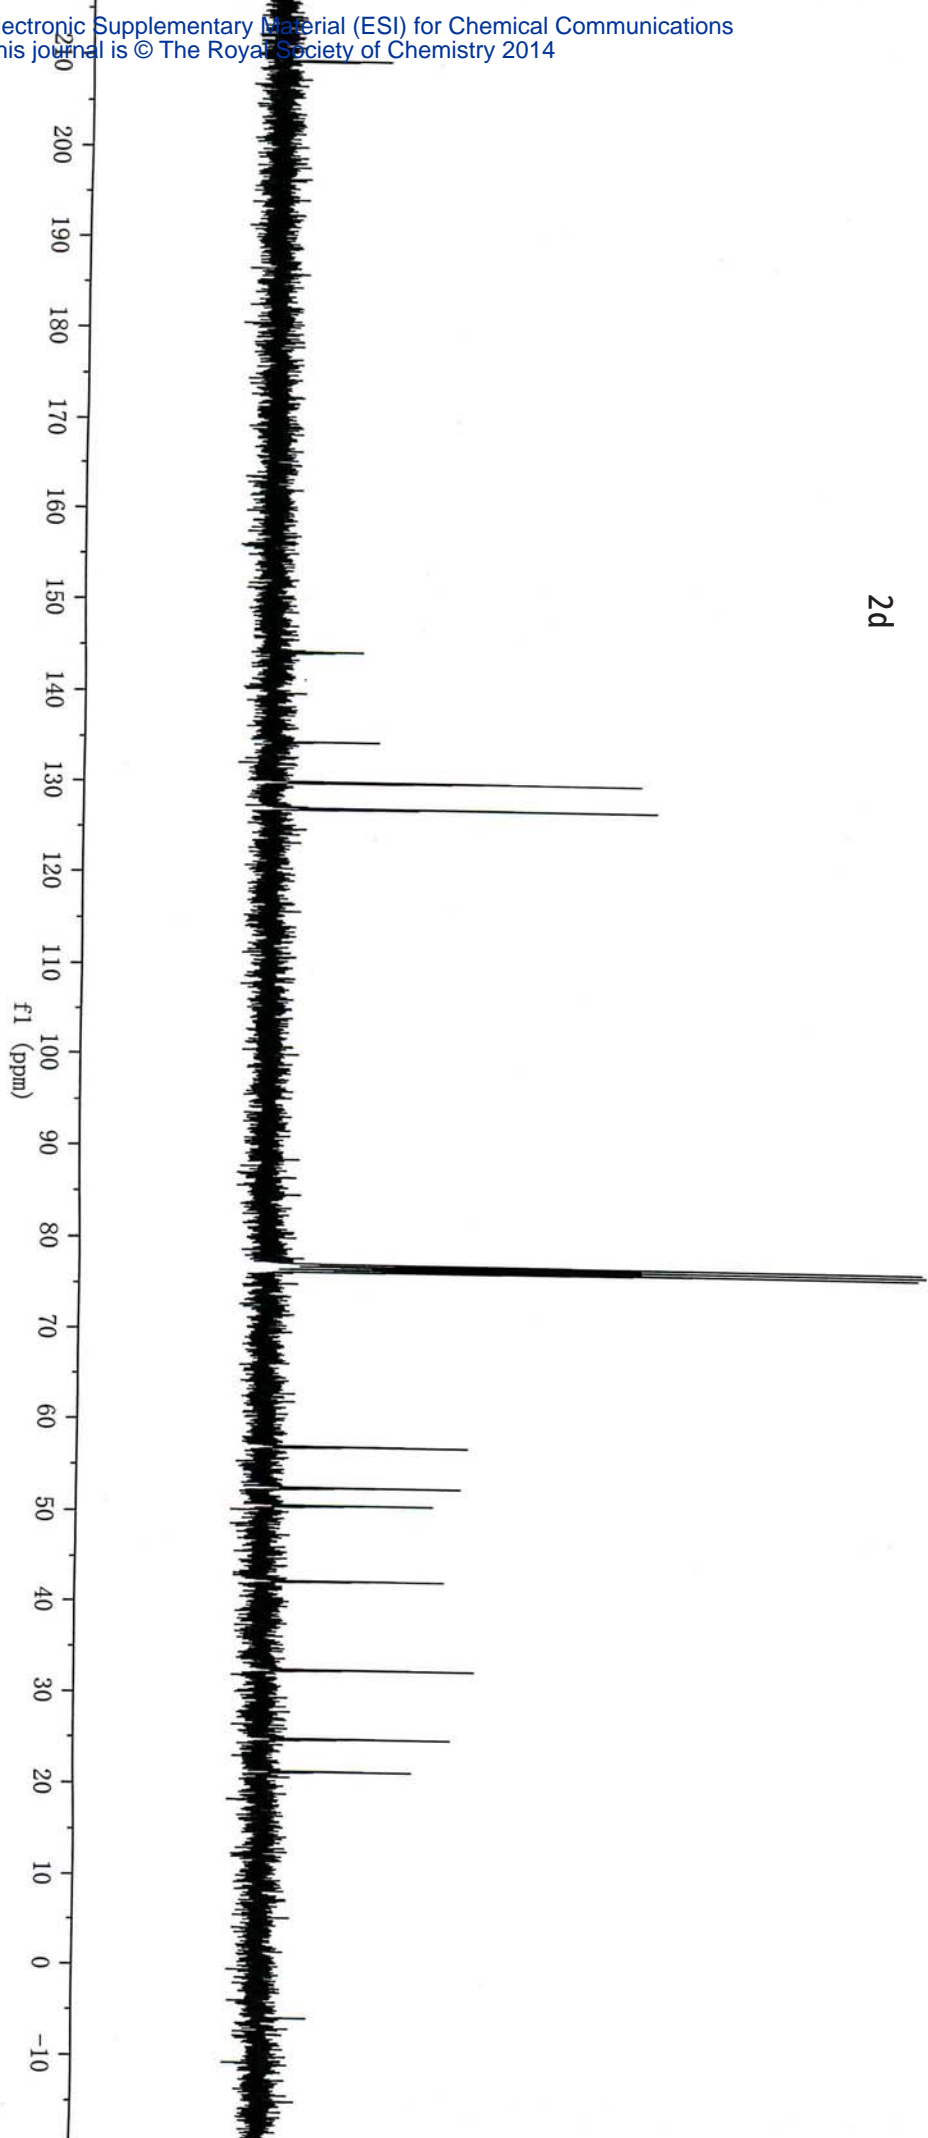

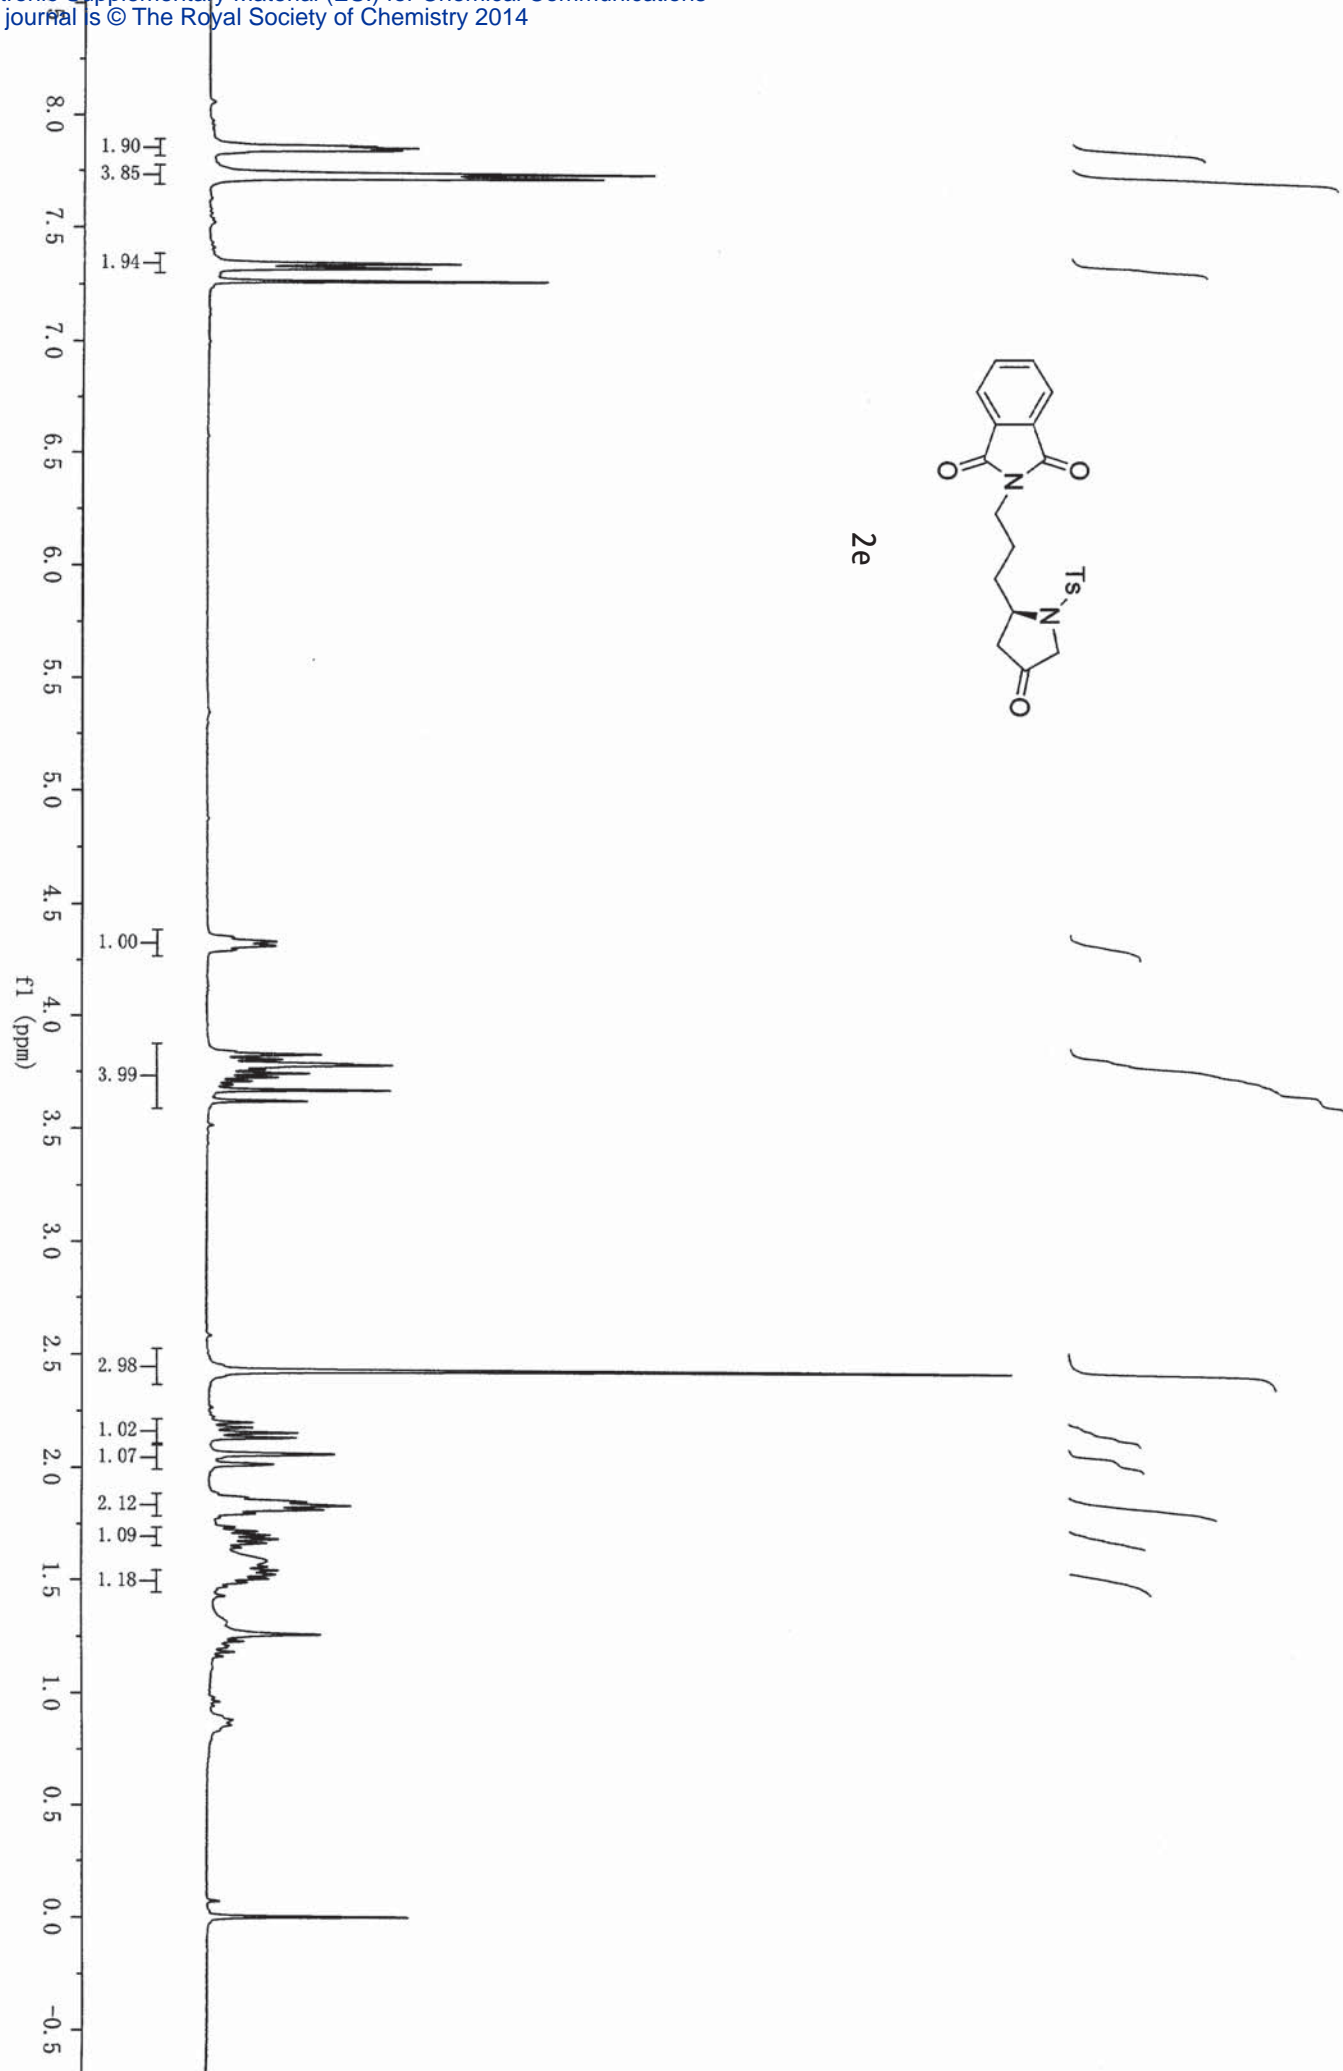

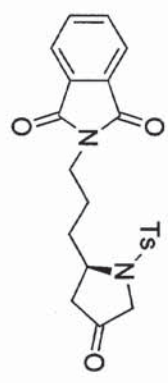

2e

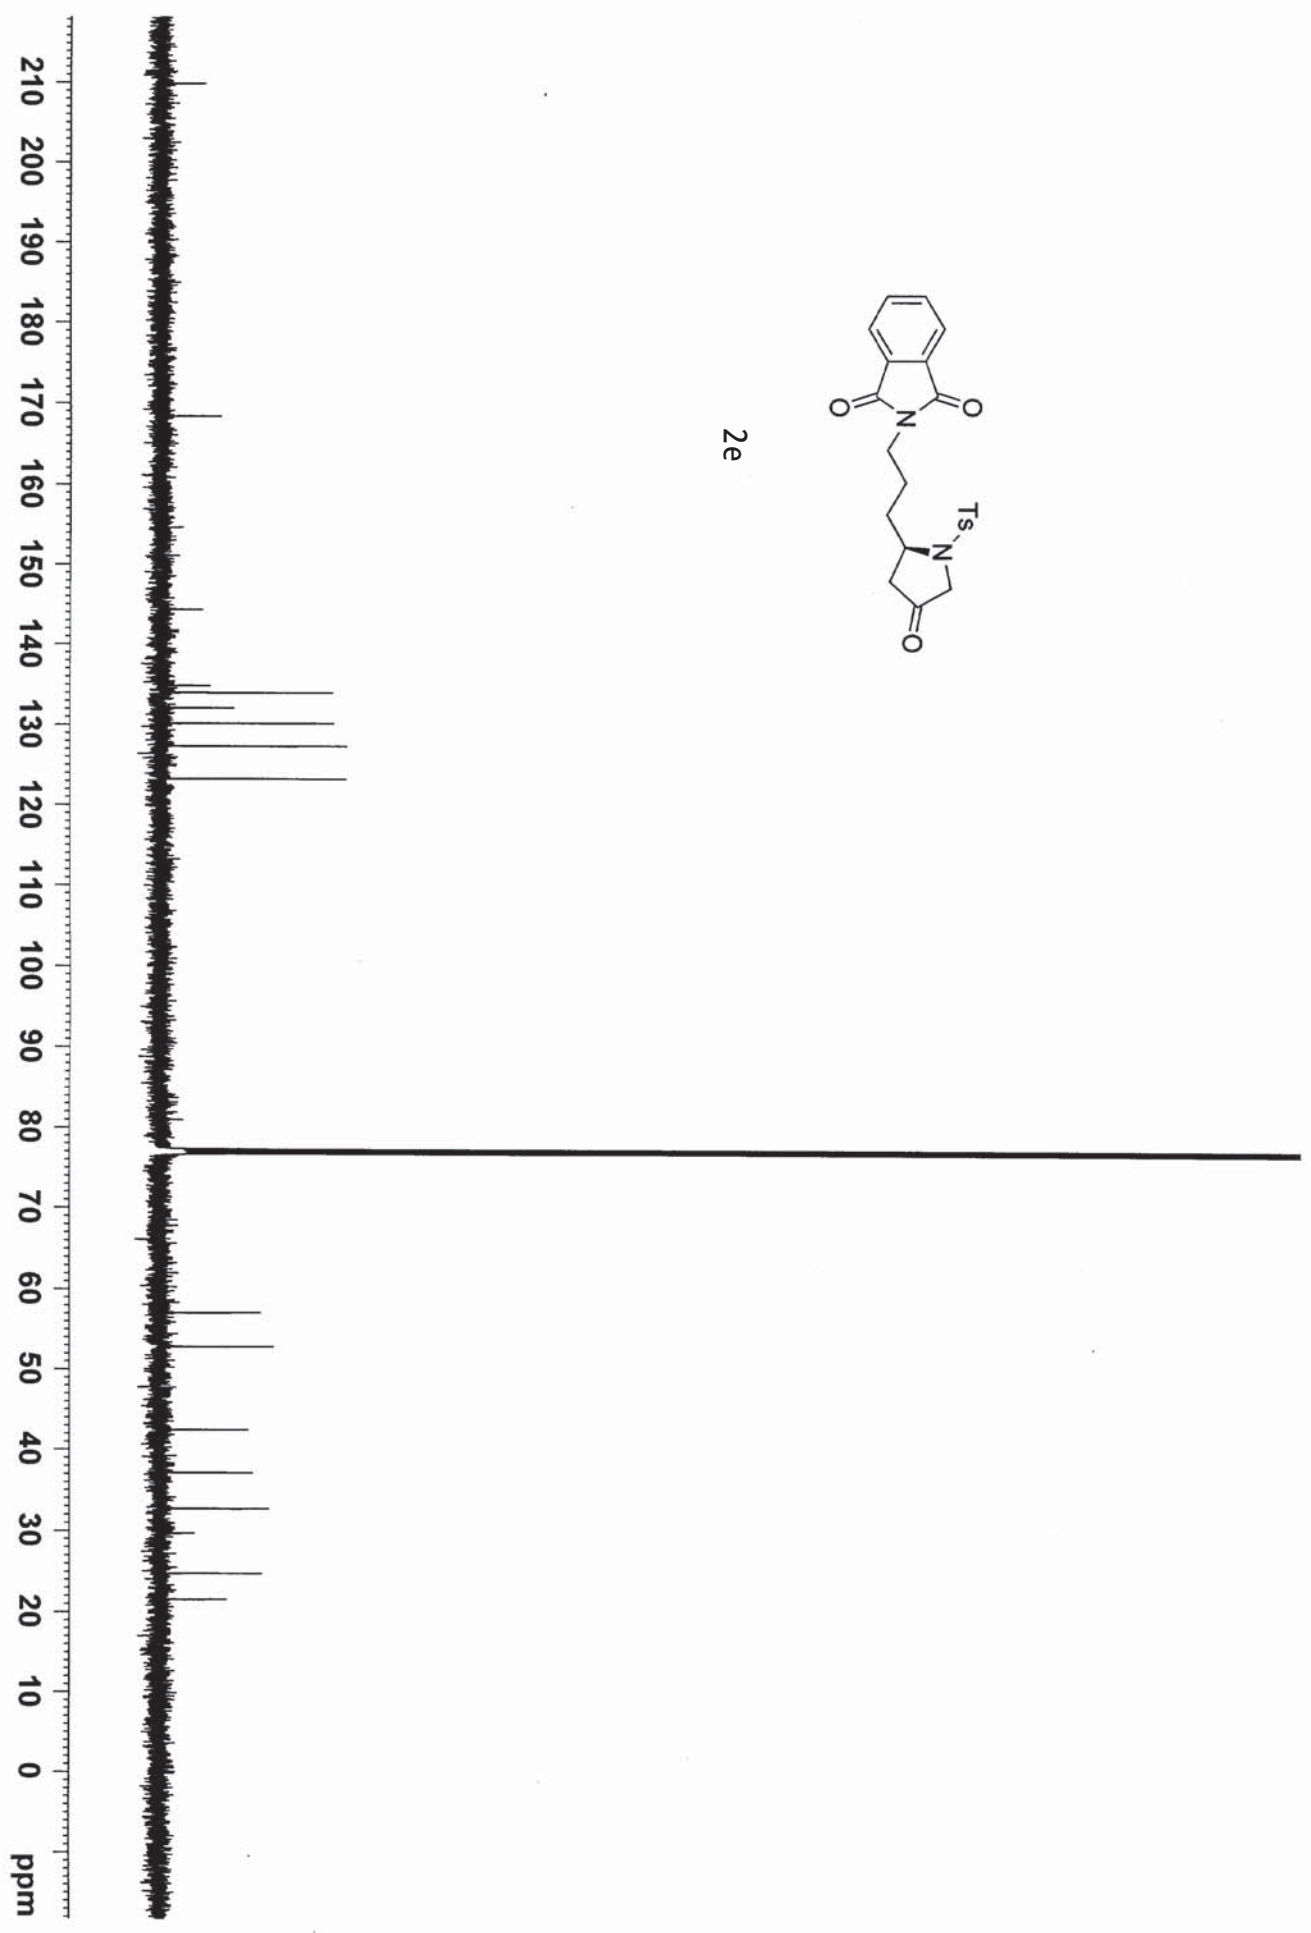

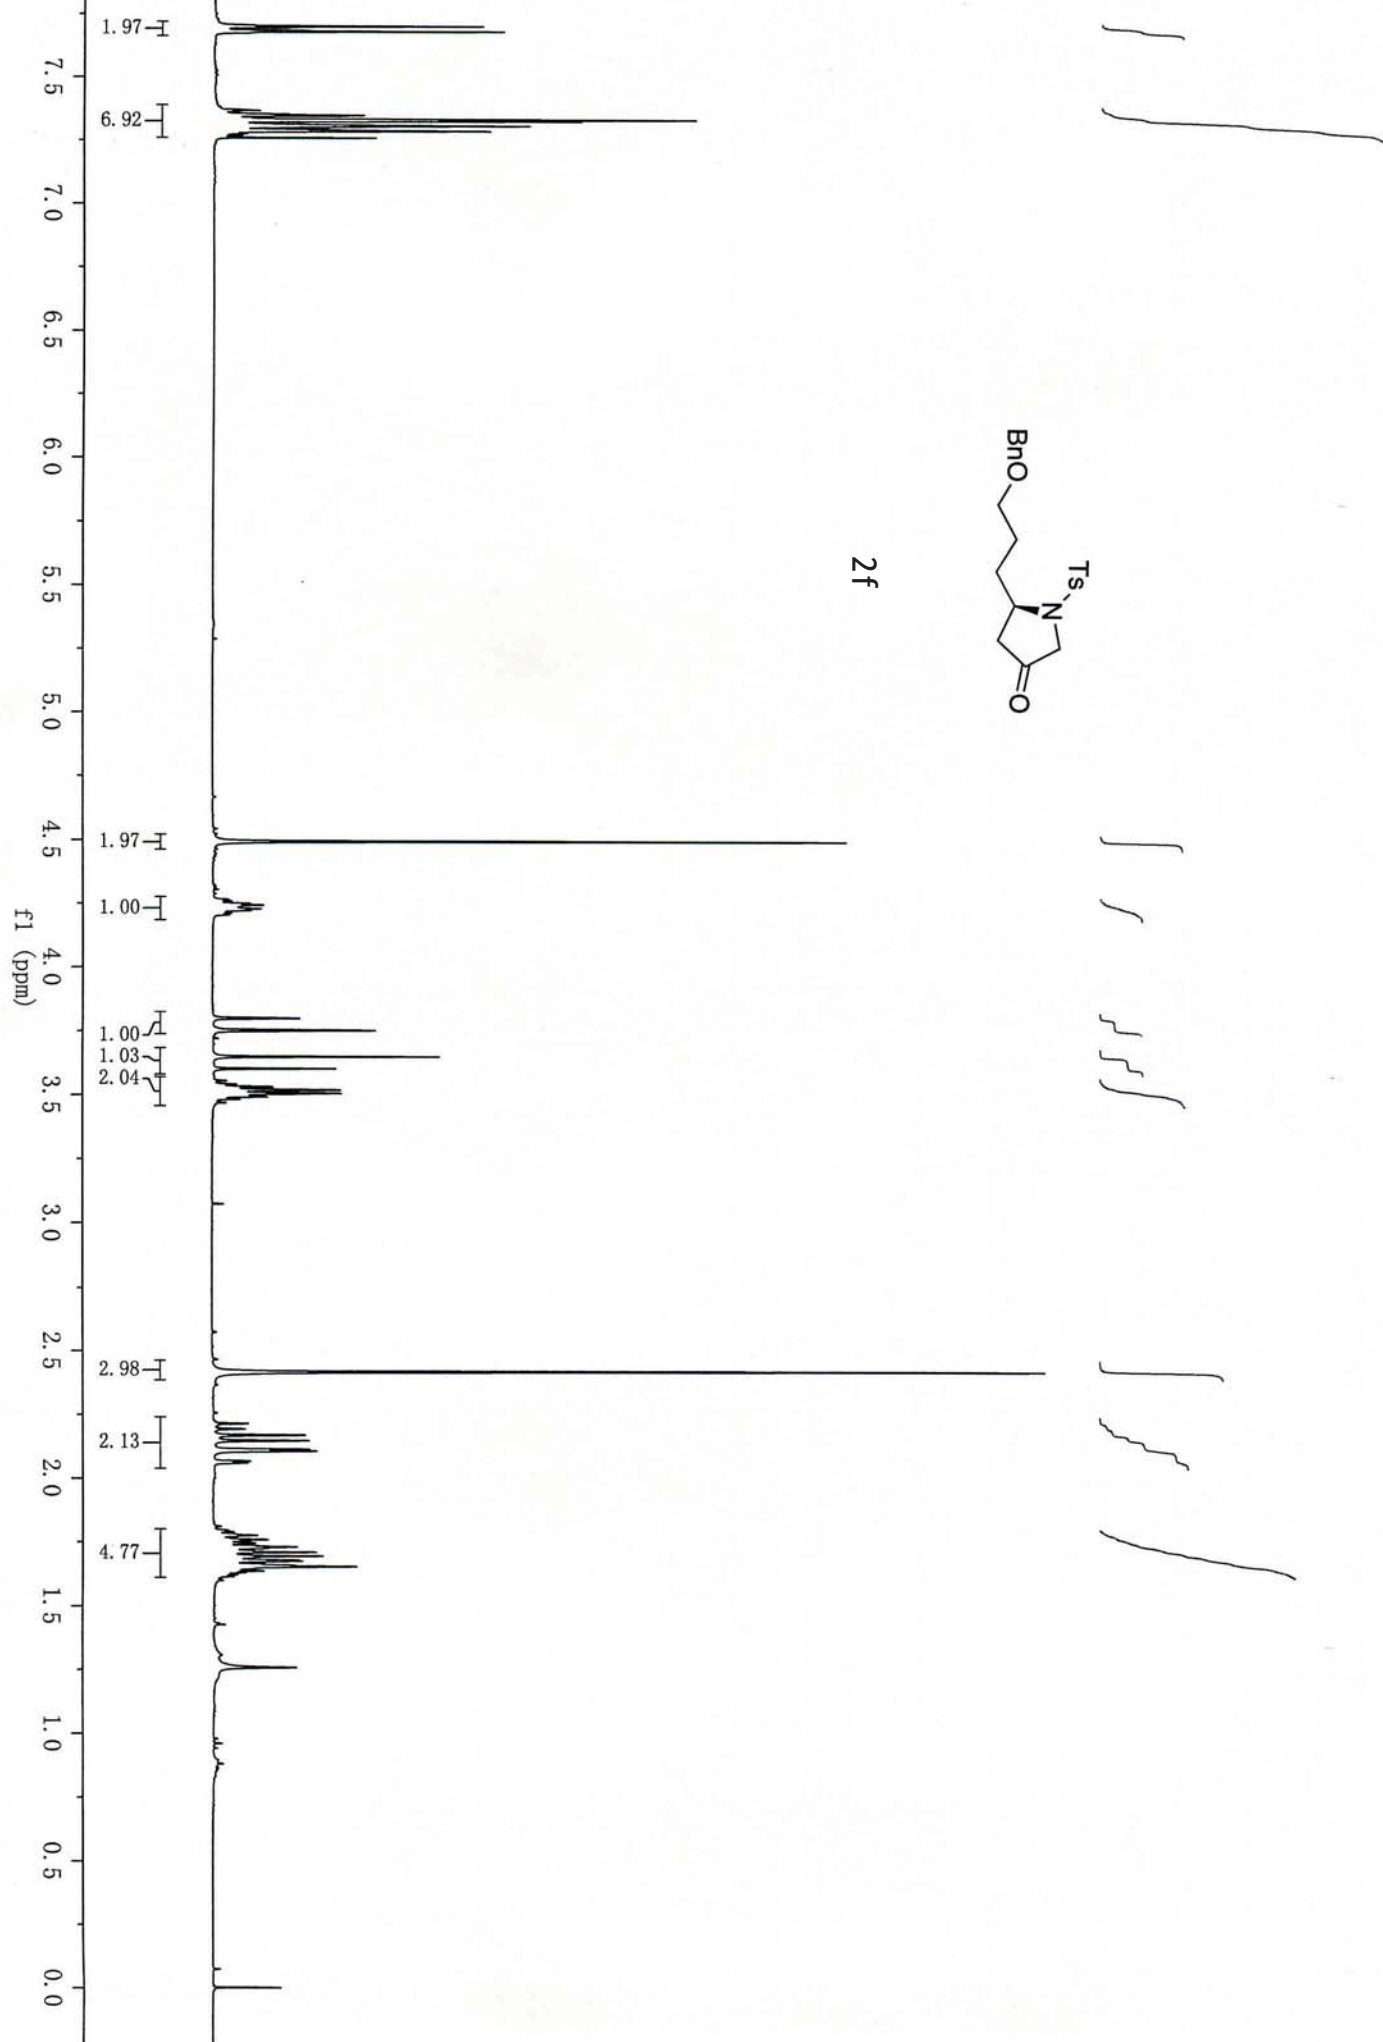

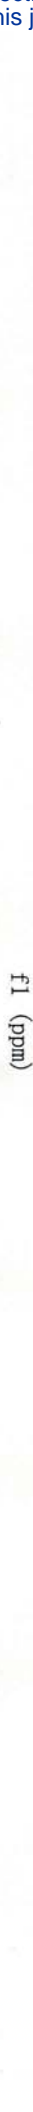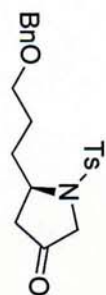

2f

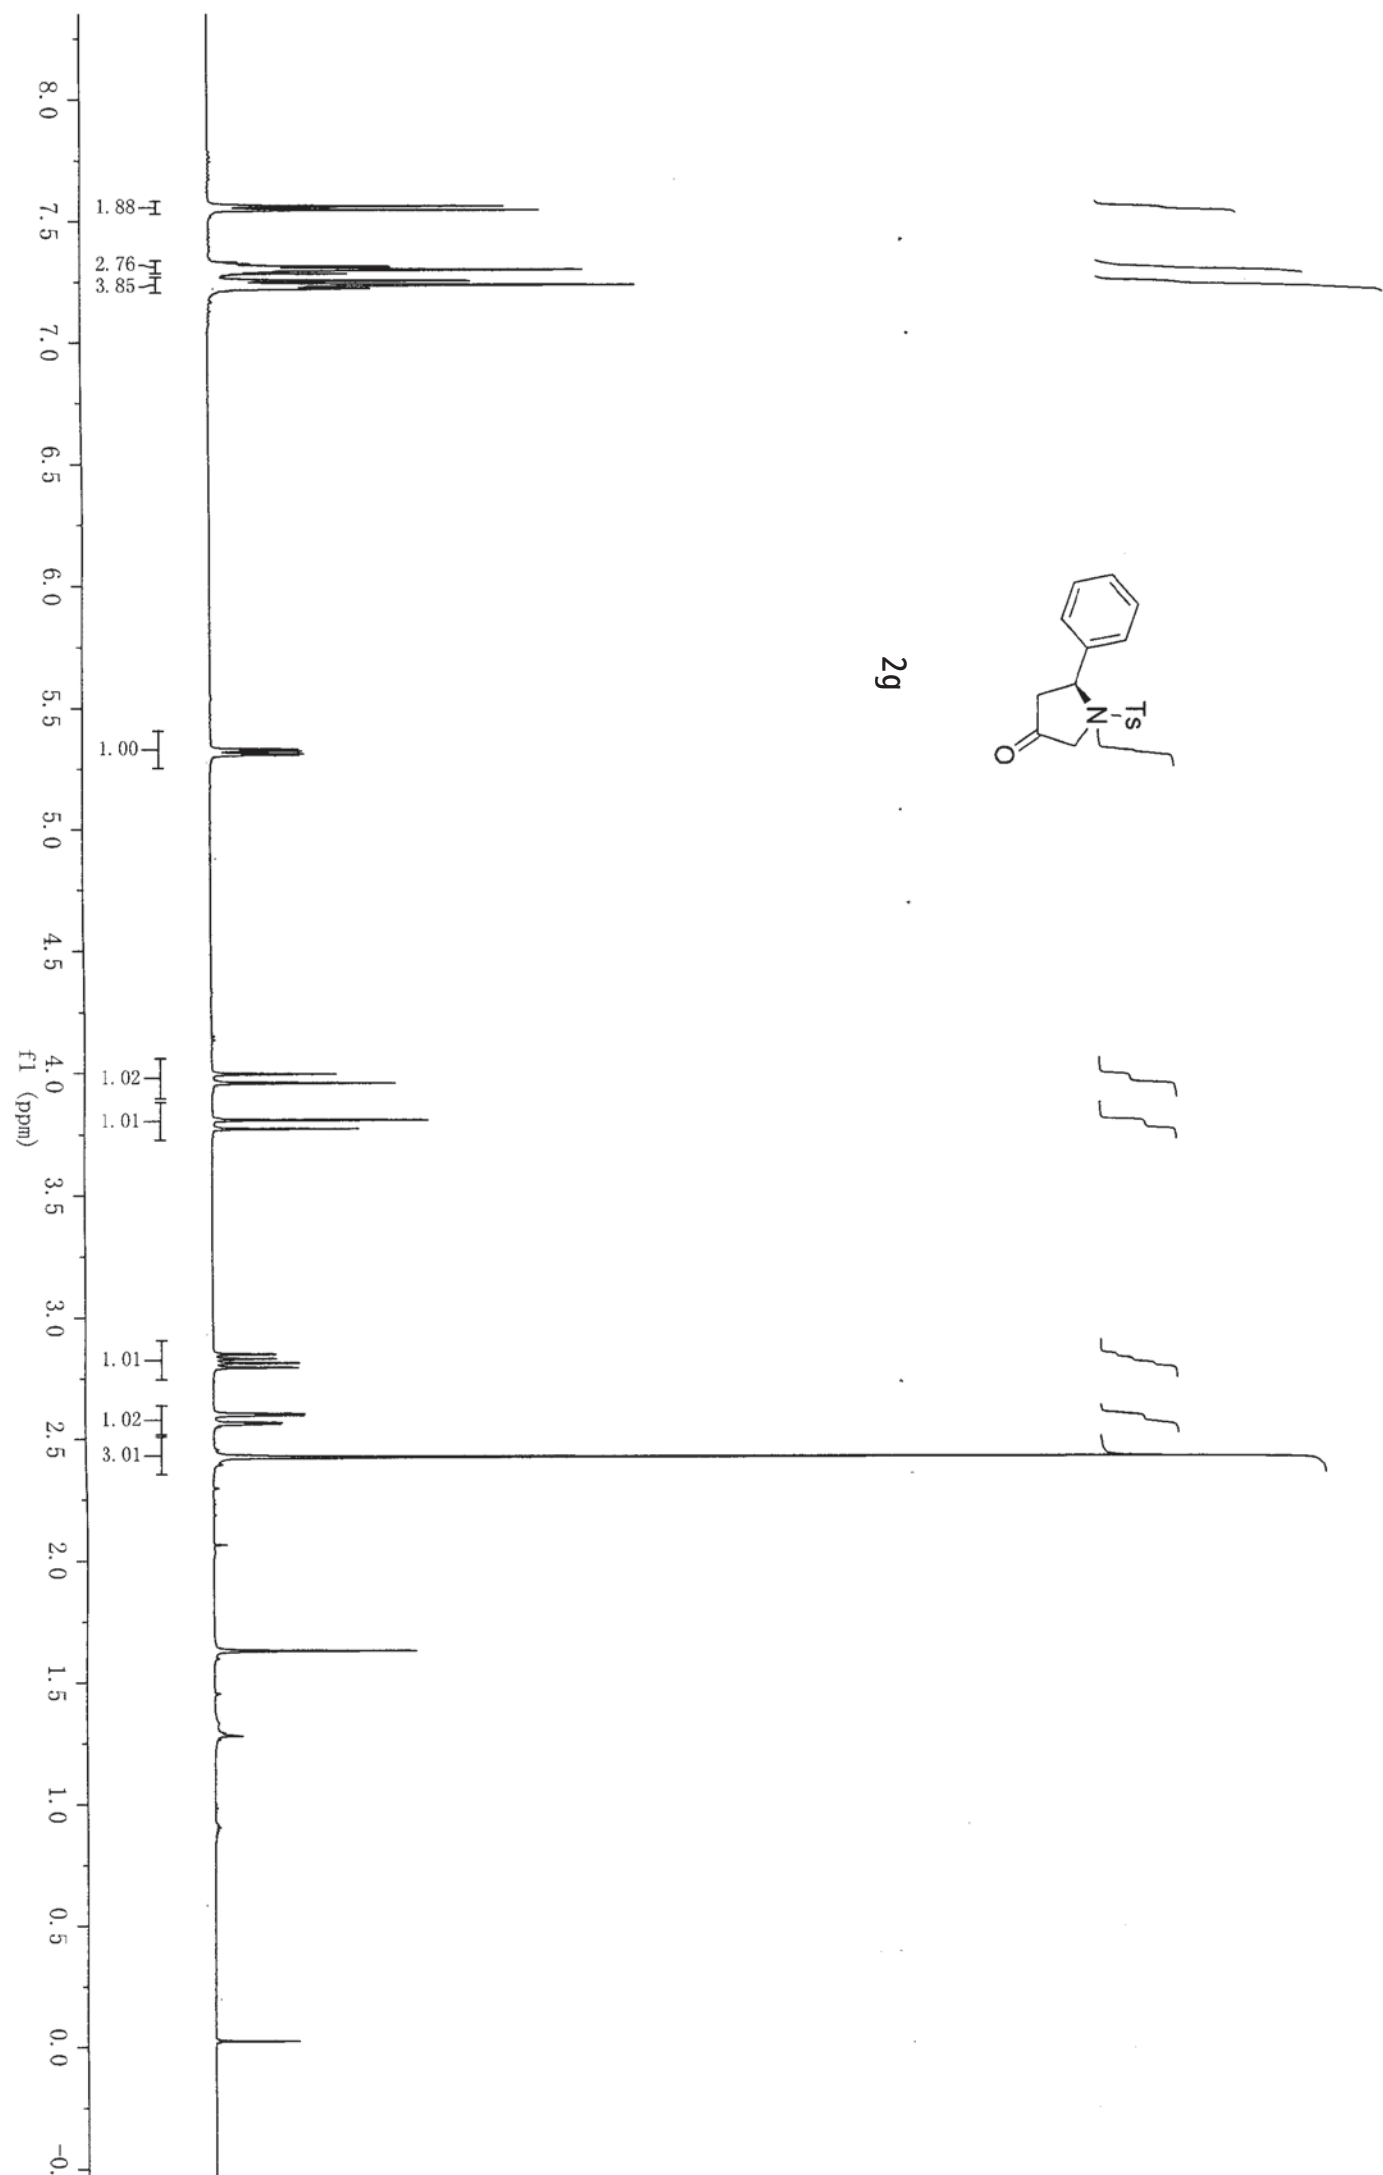



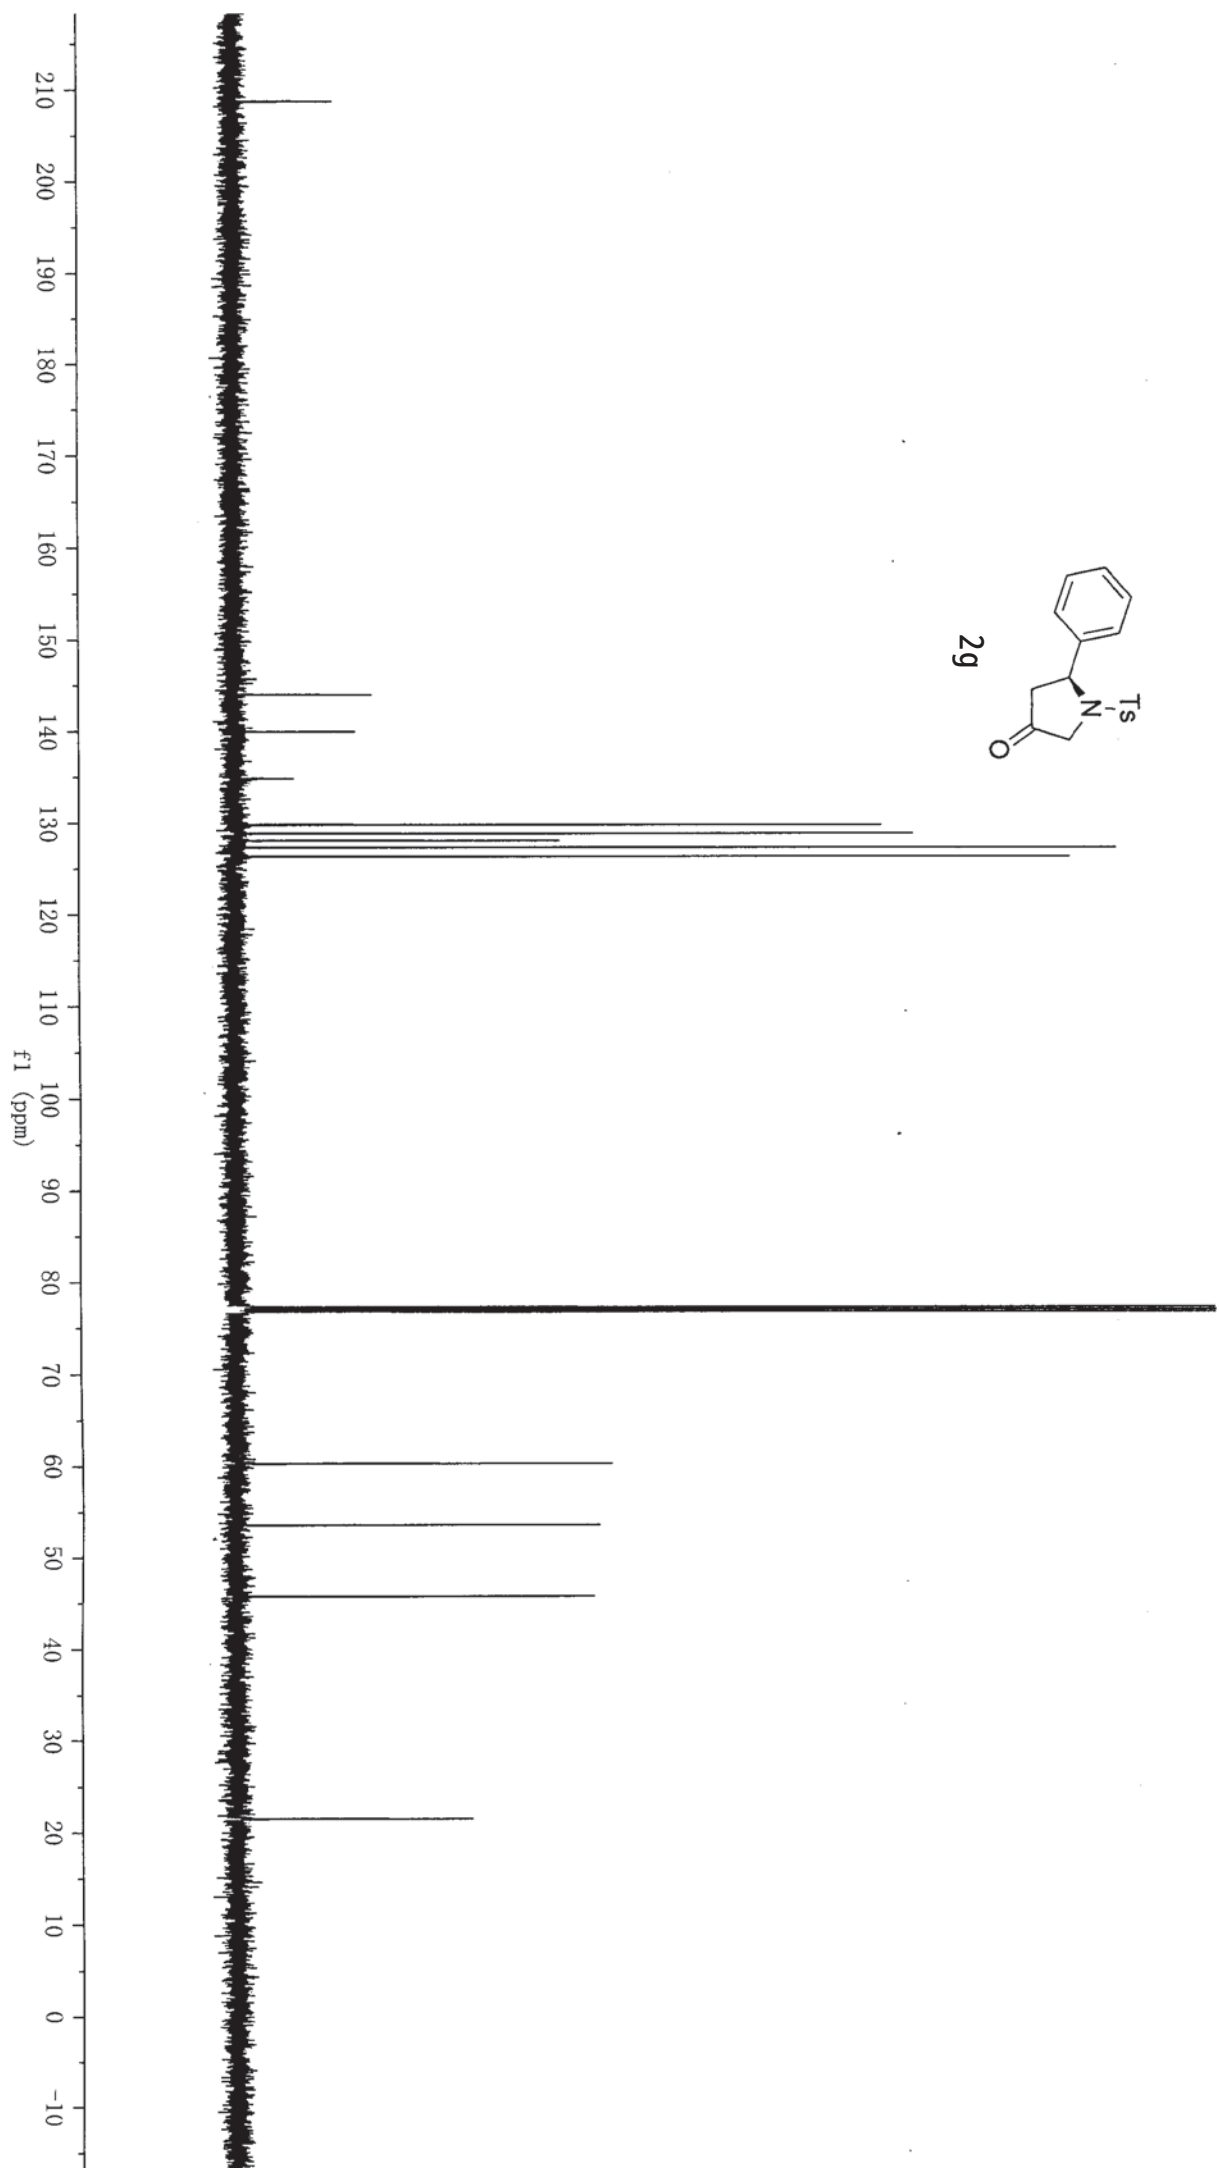

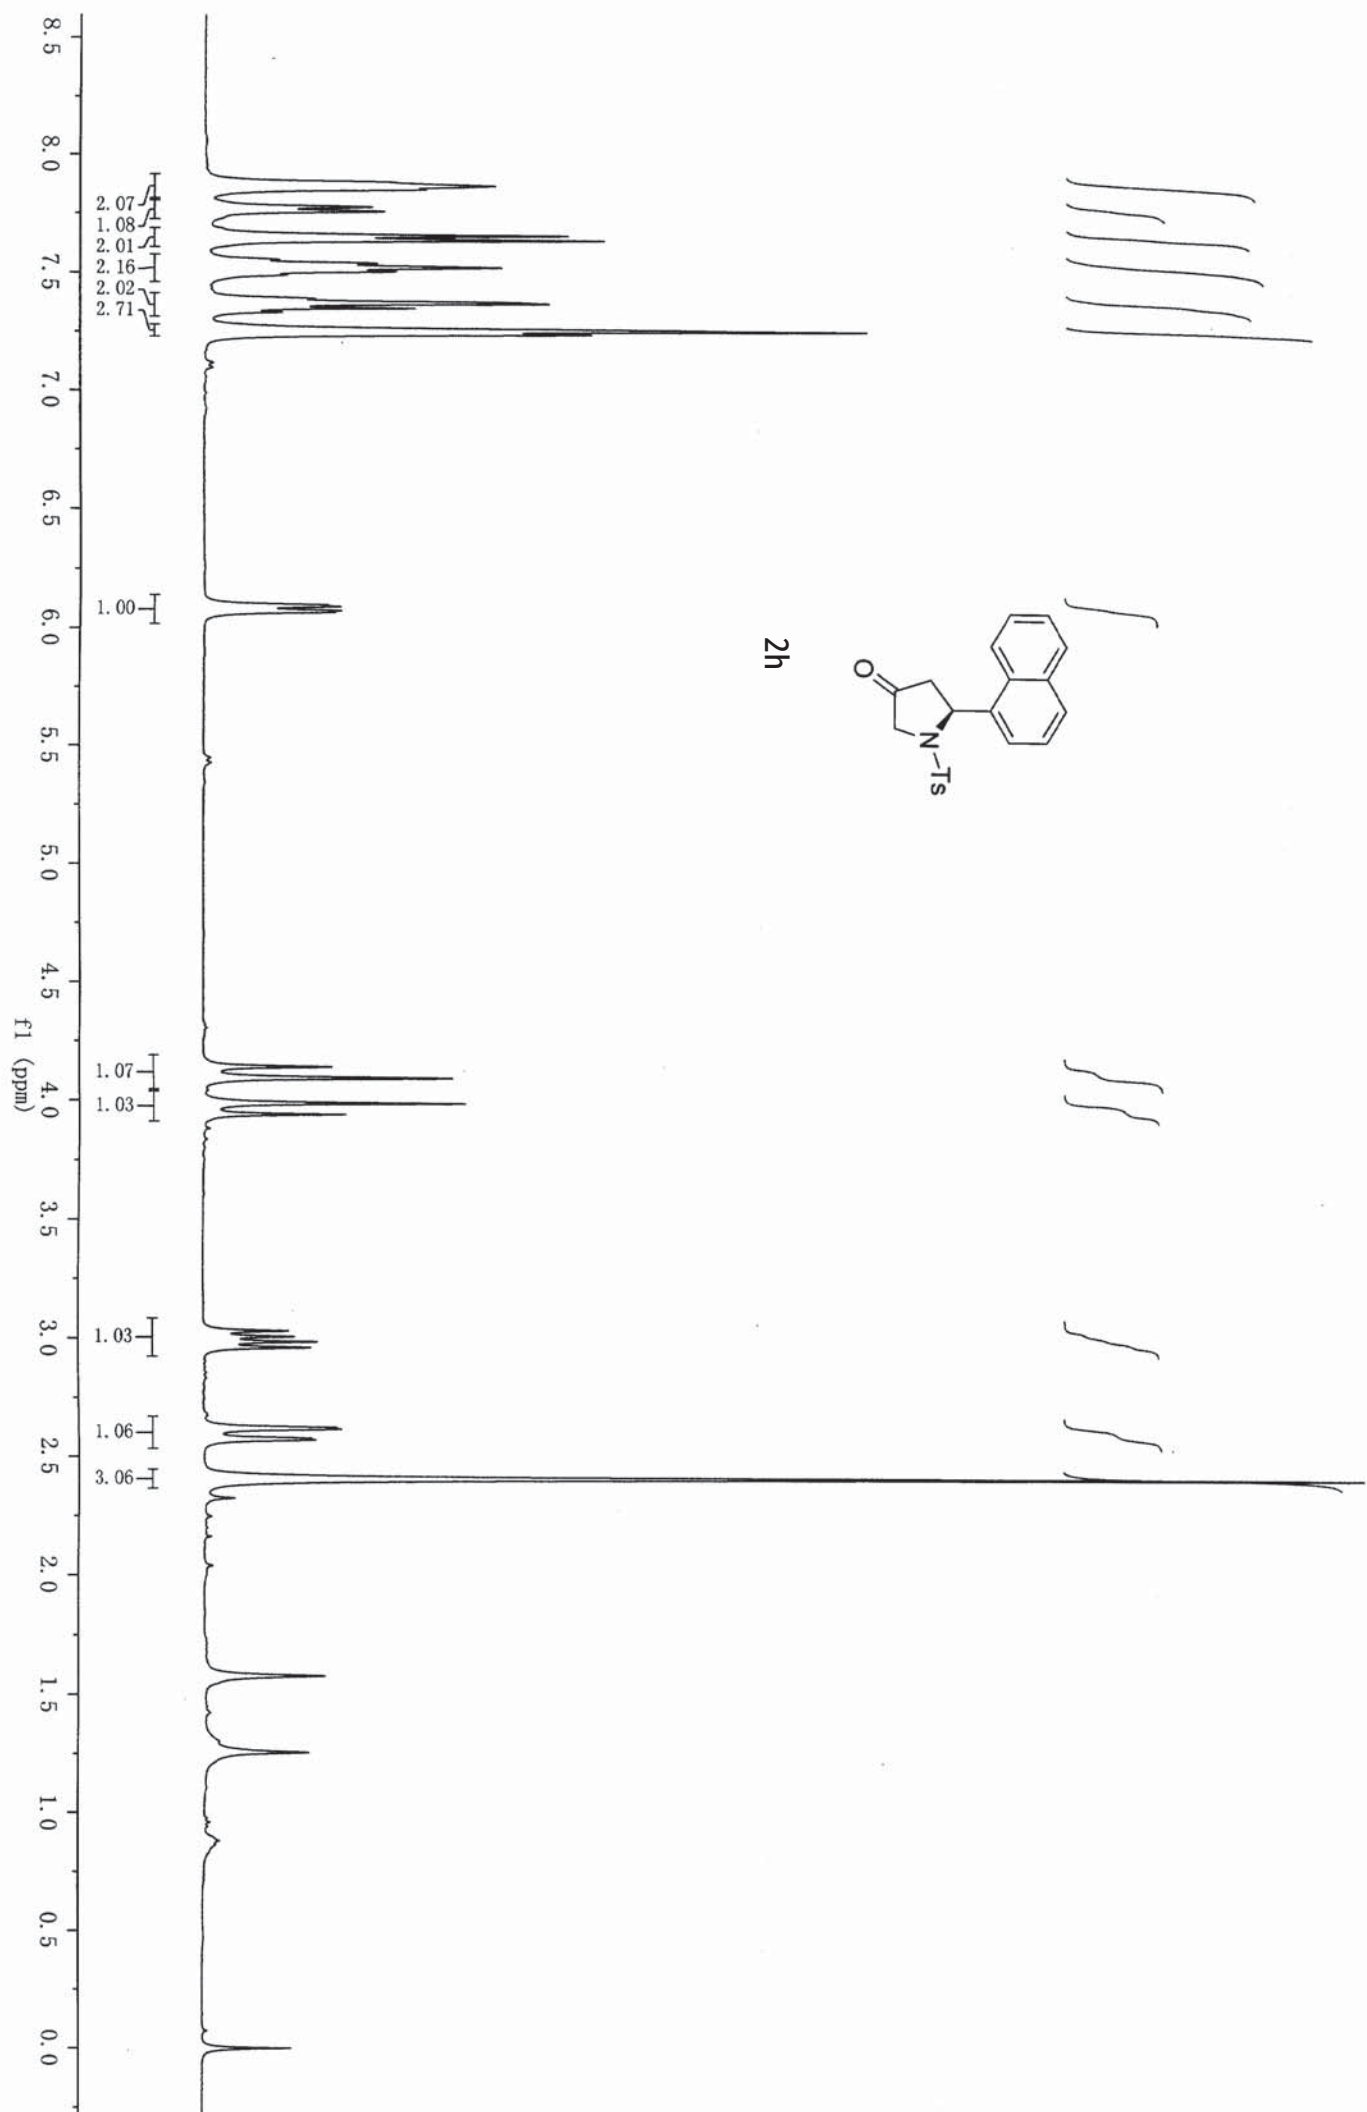

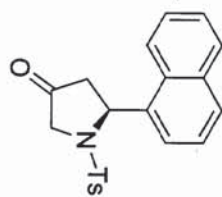

2h

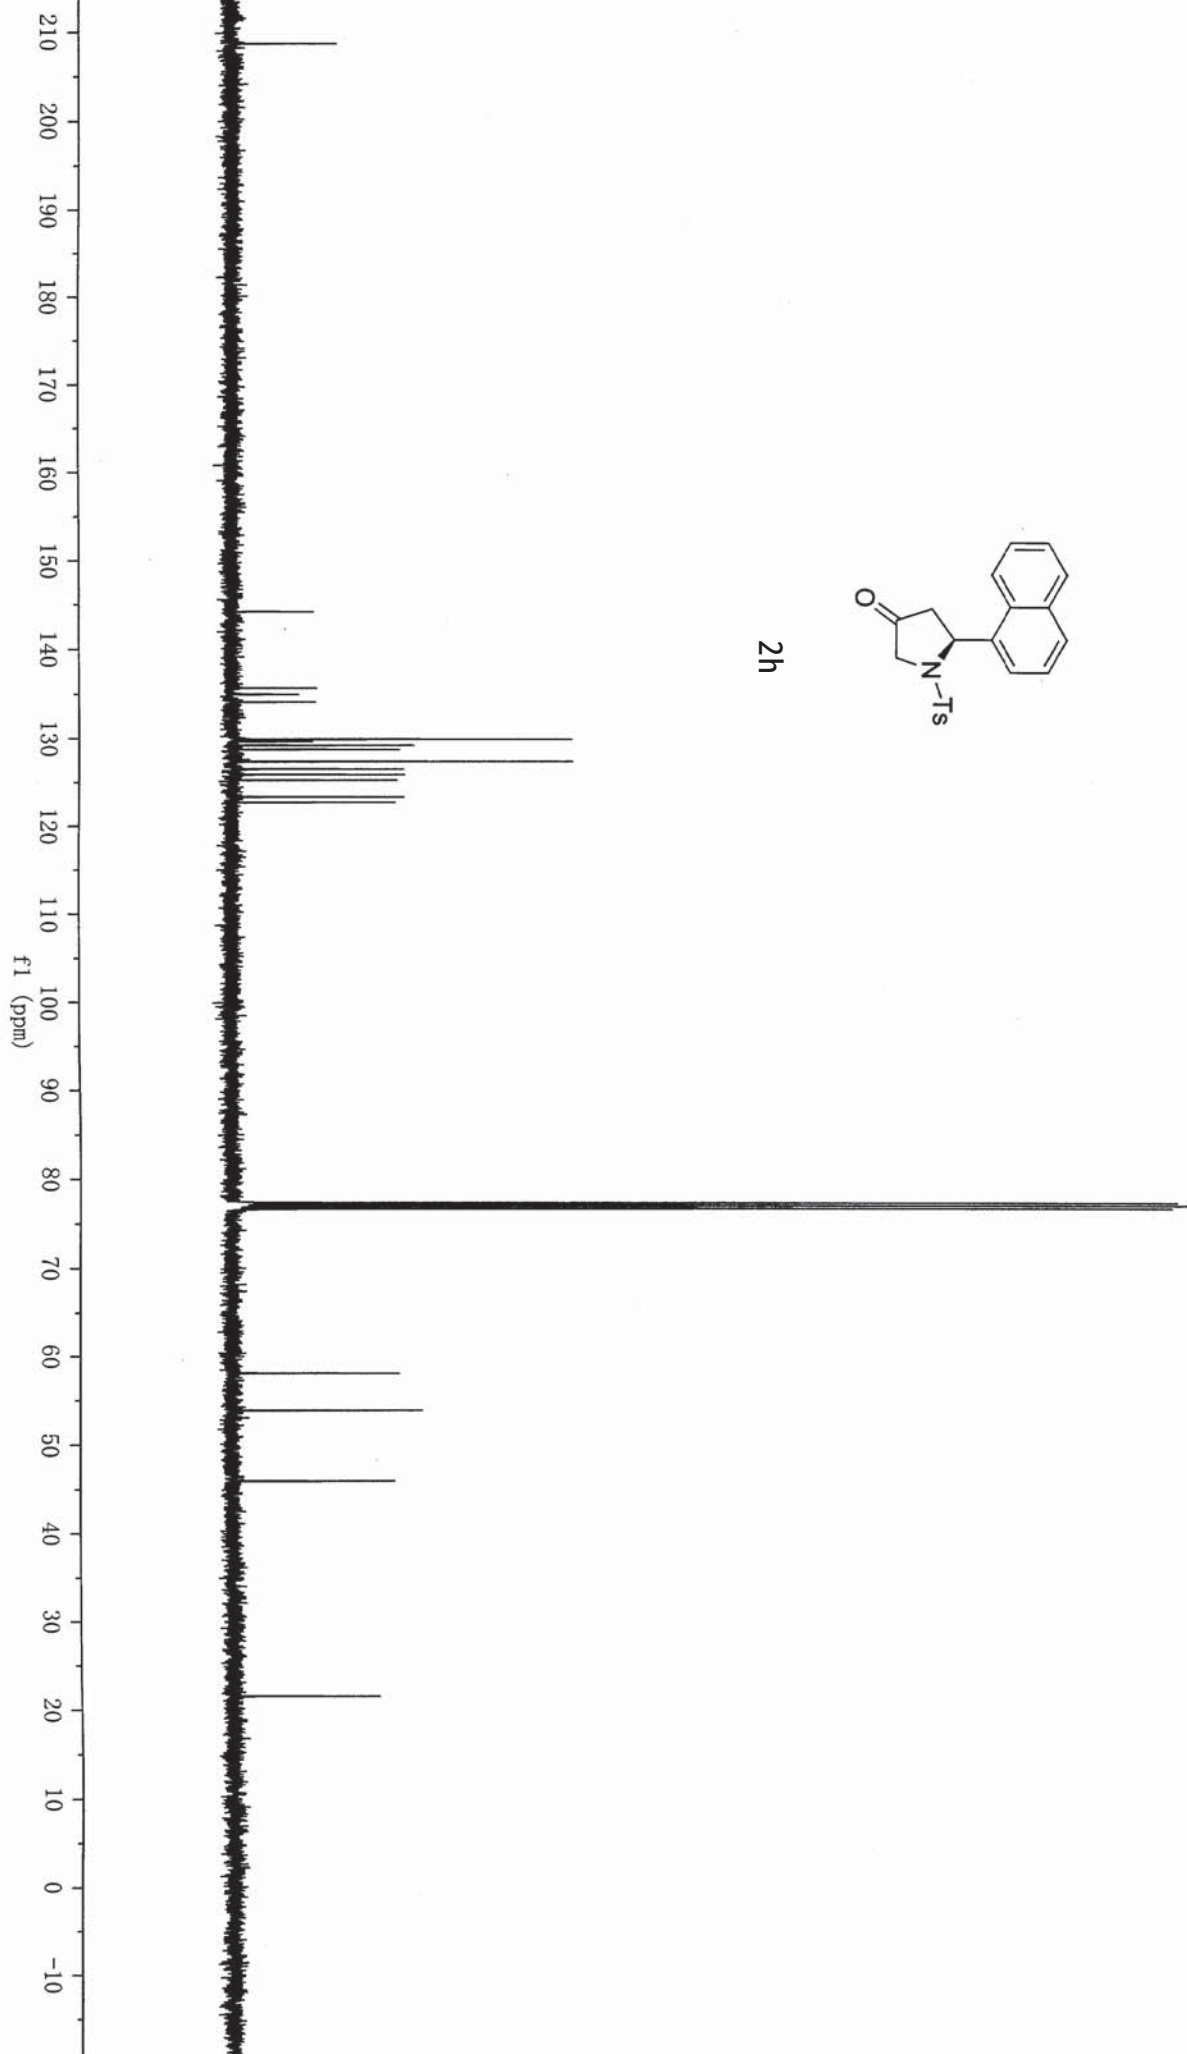

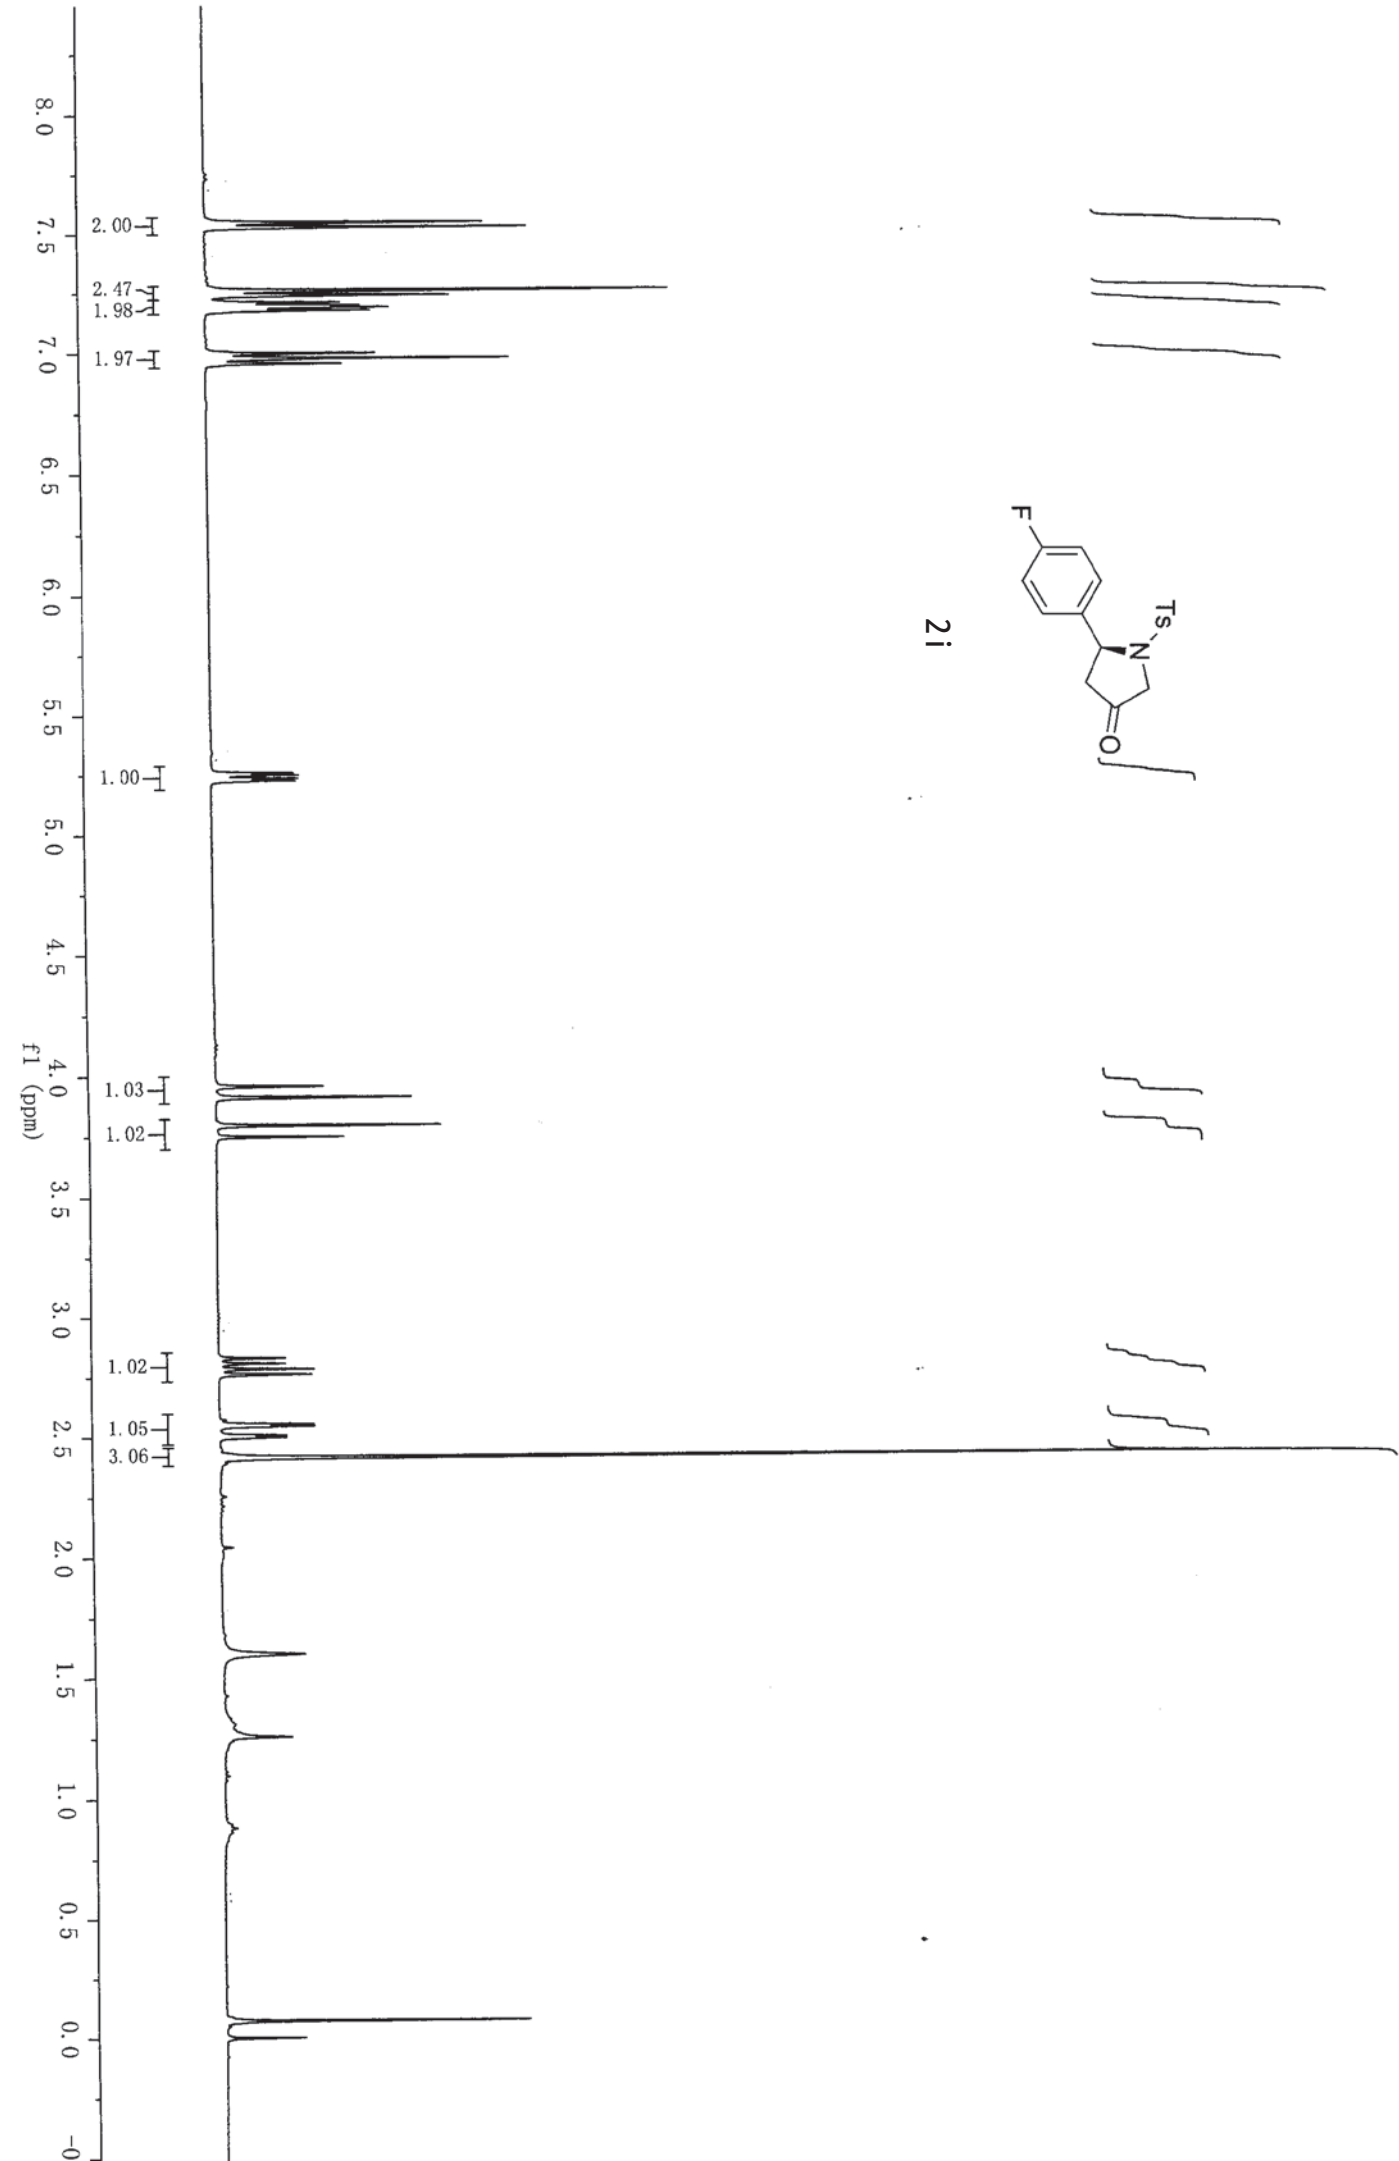

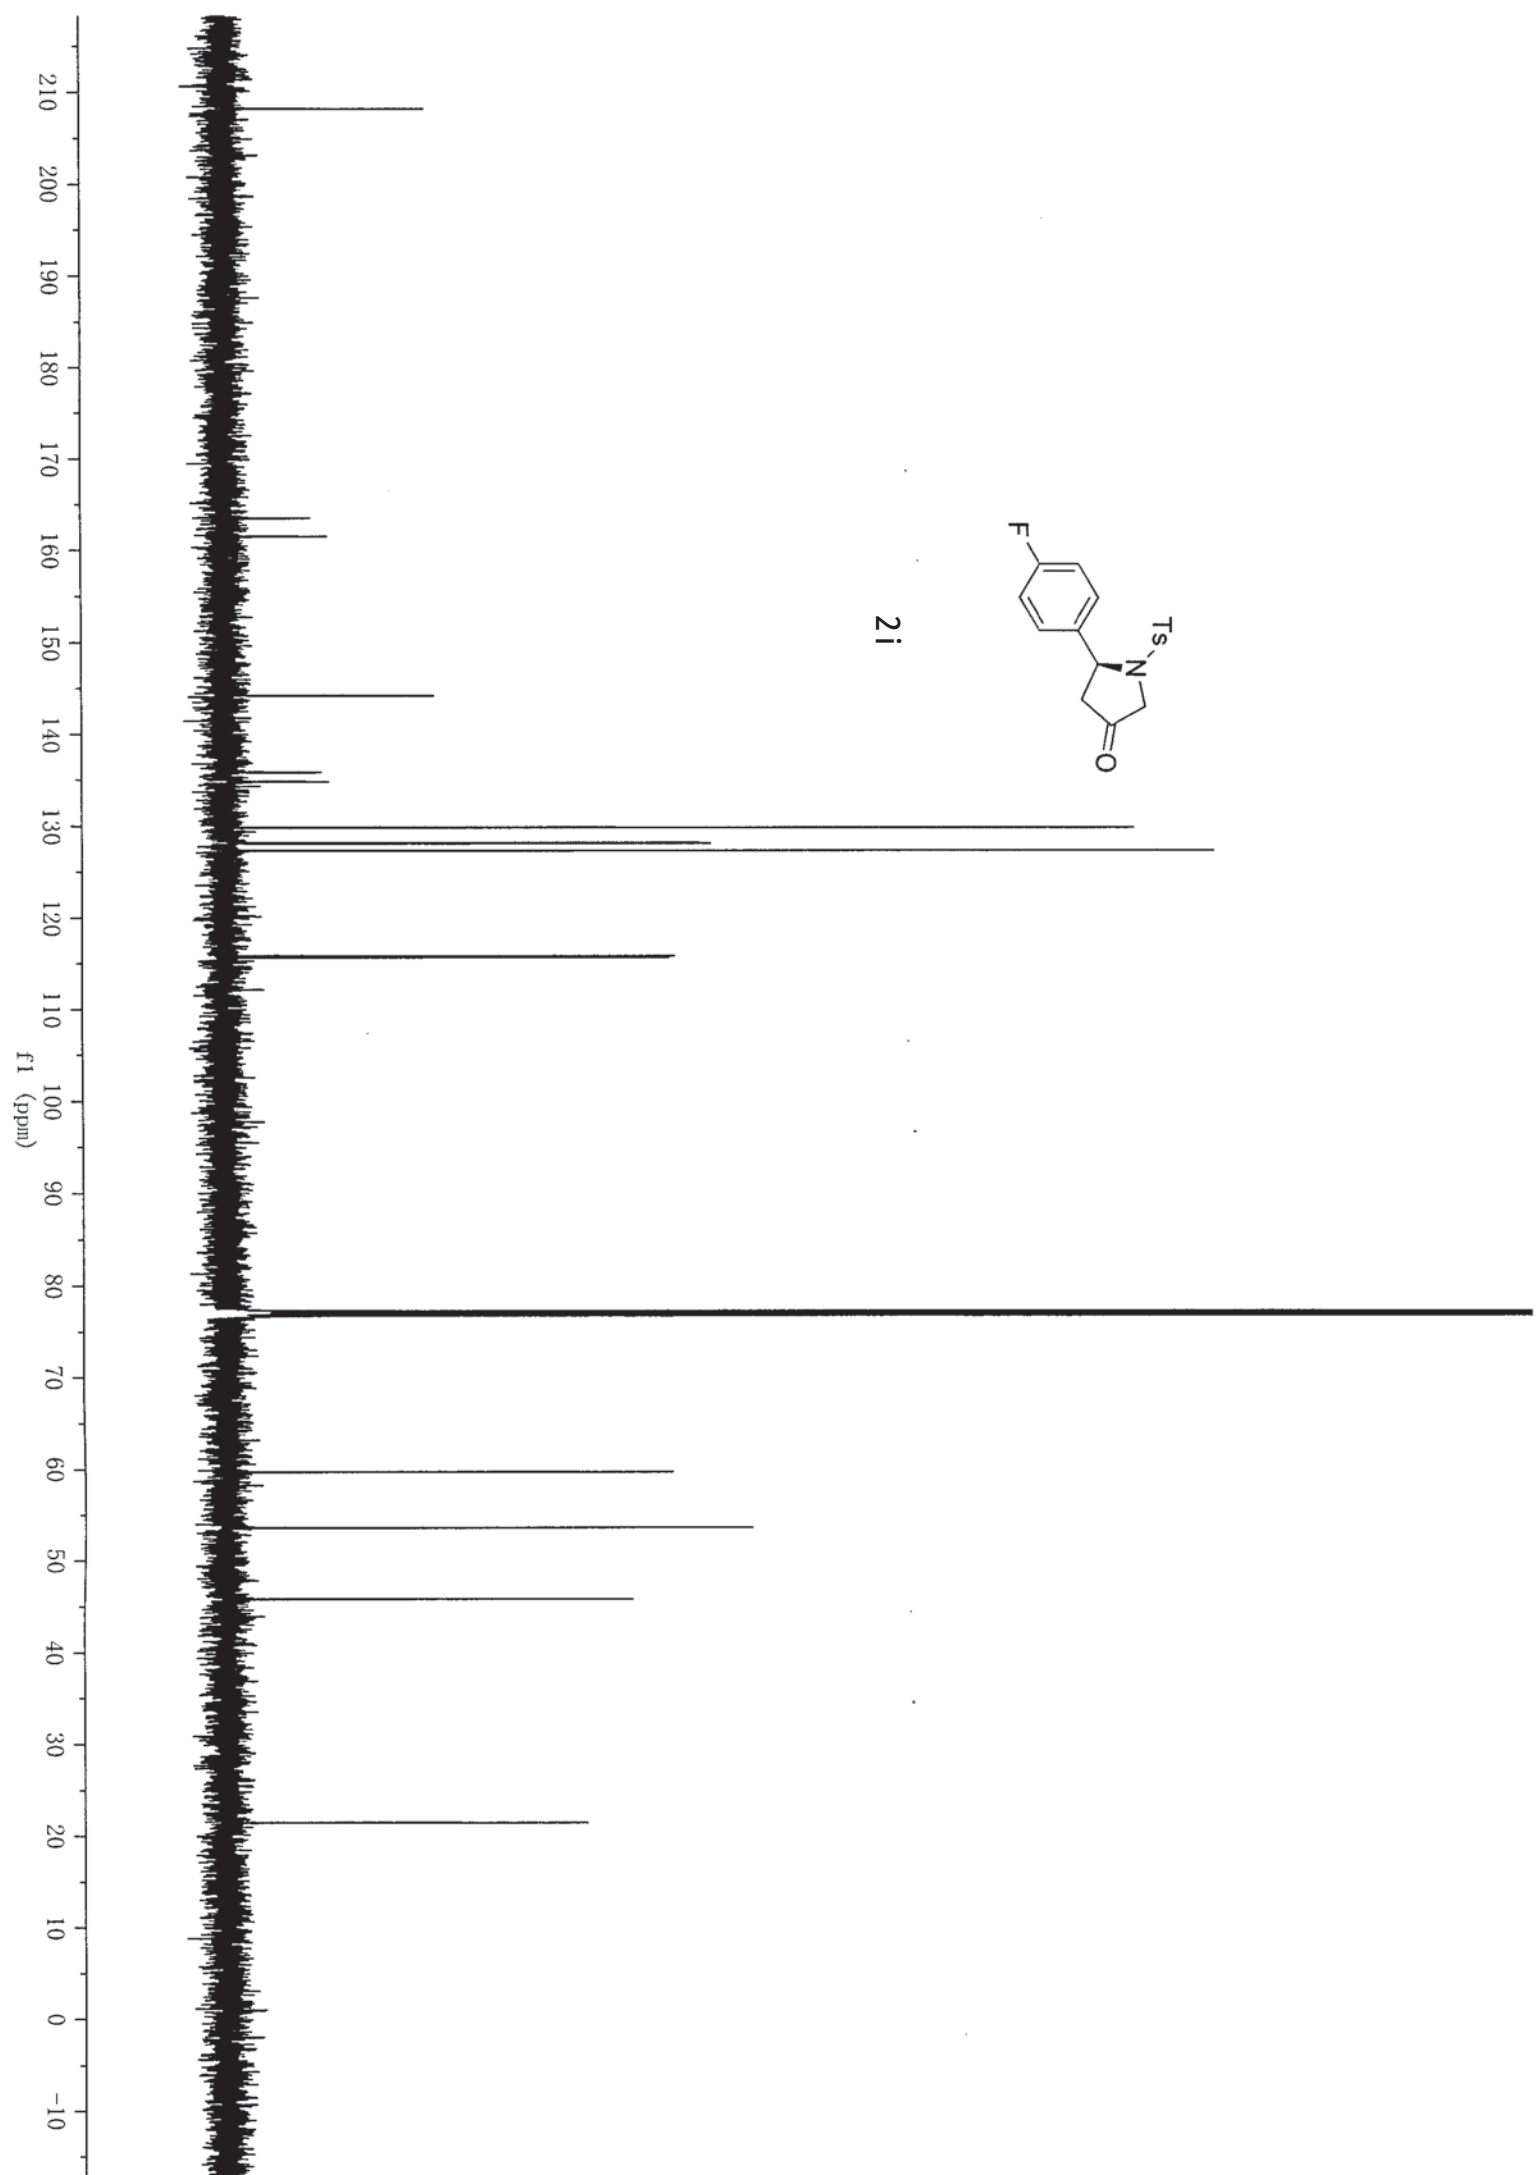

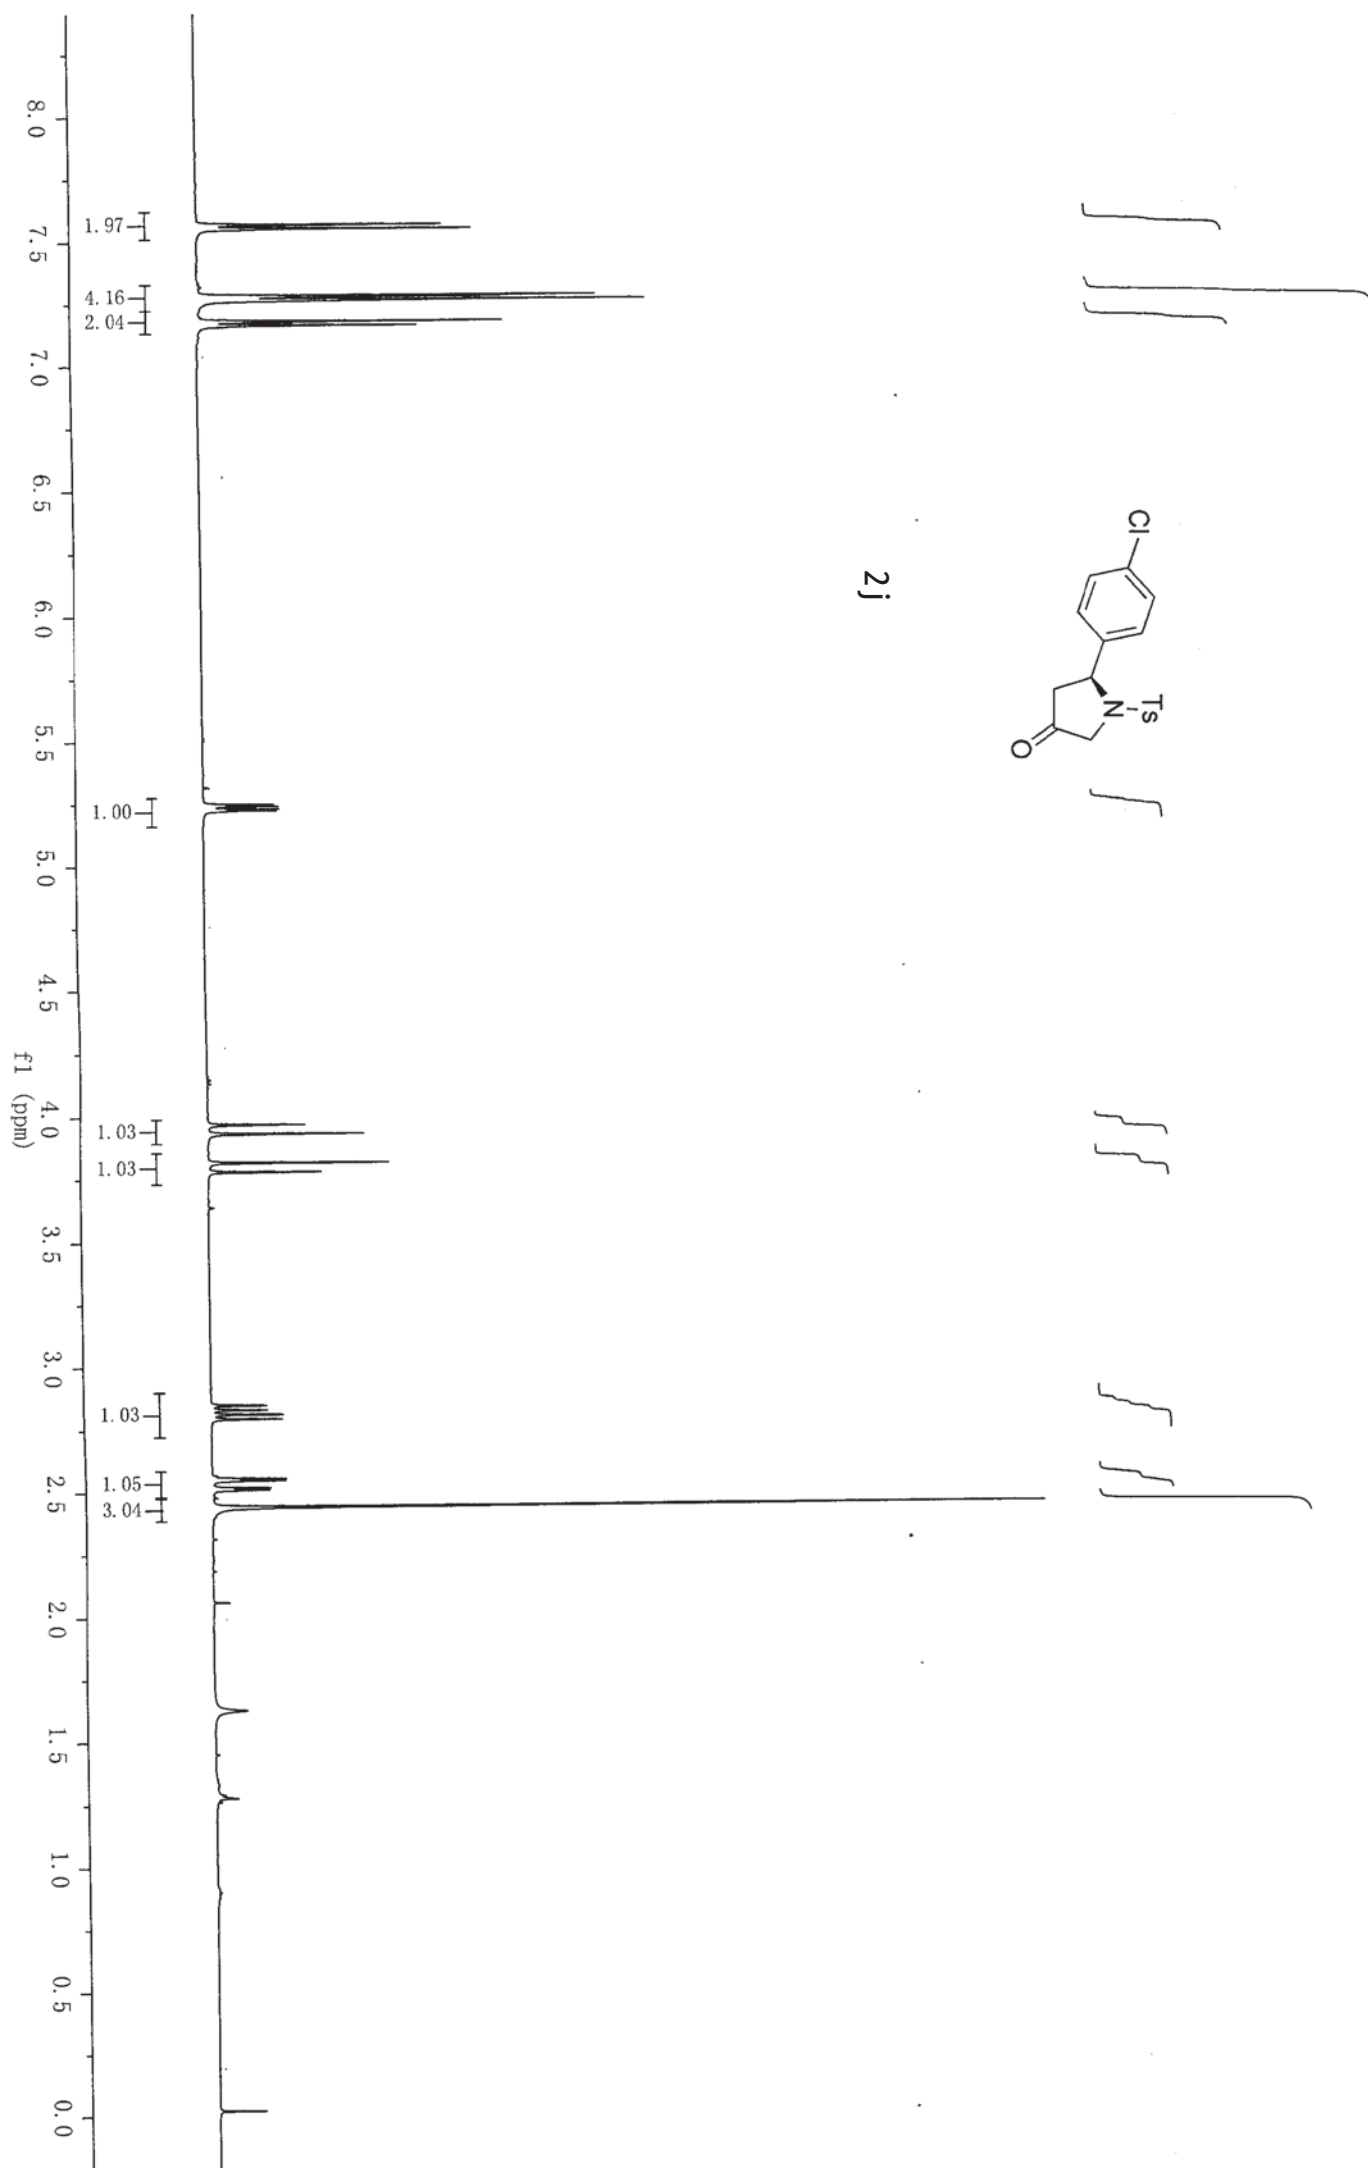

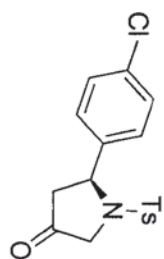

2j

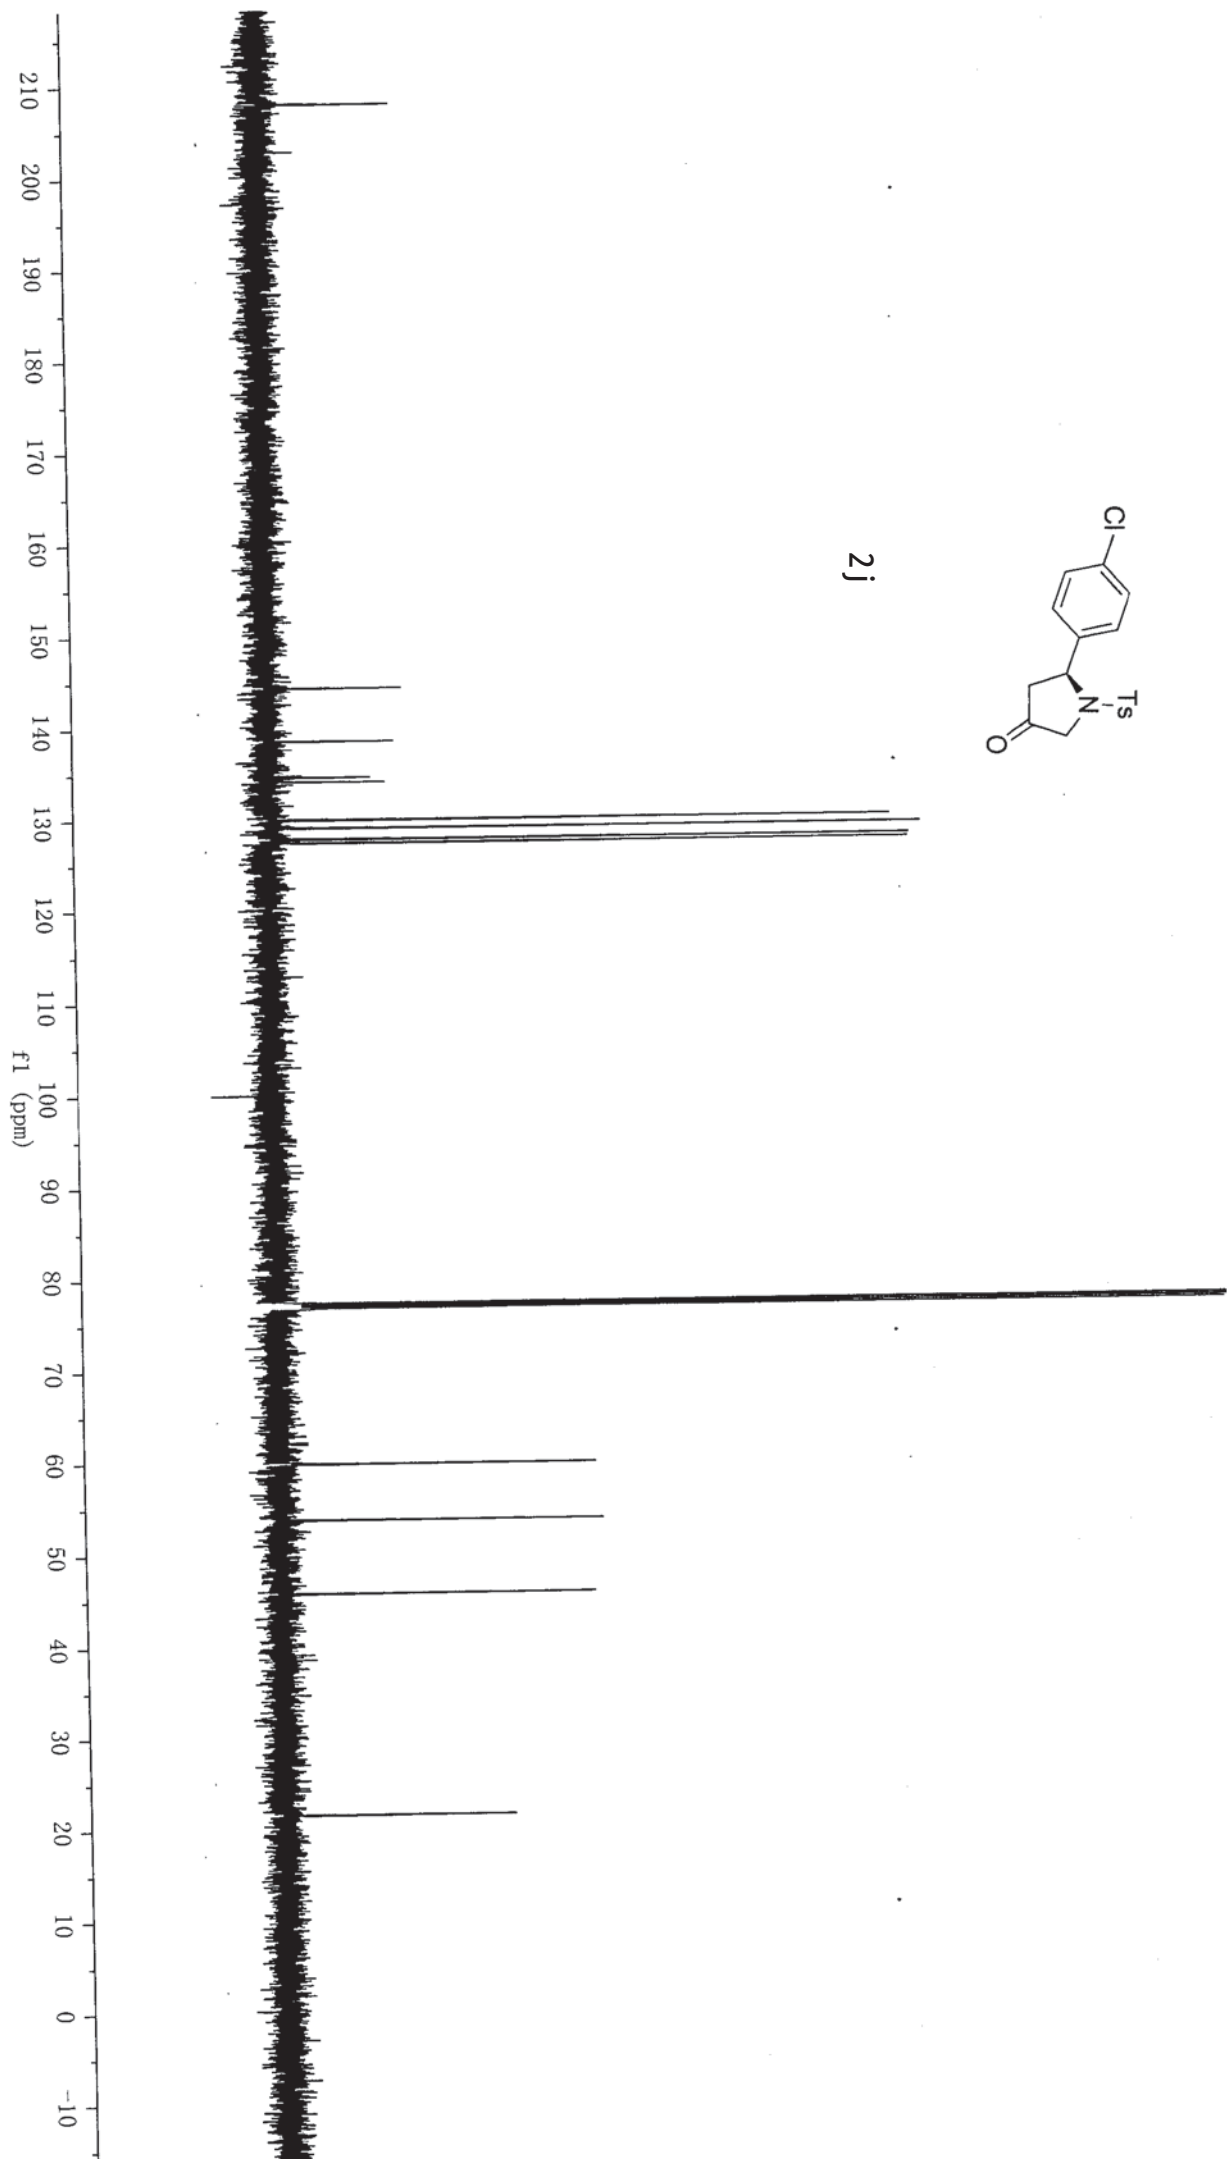

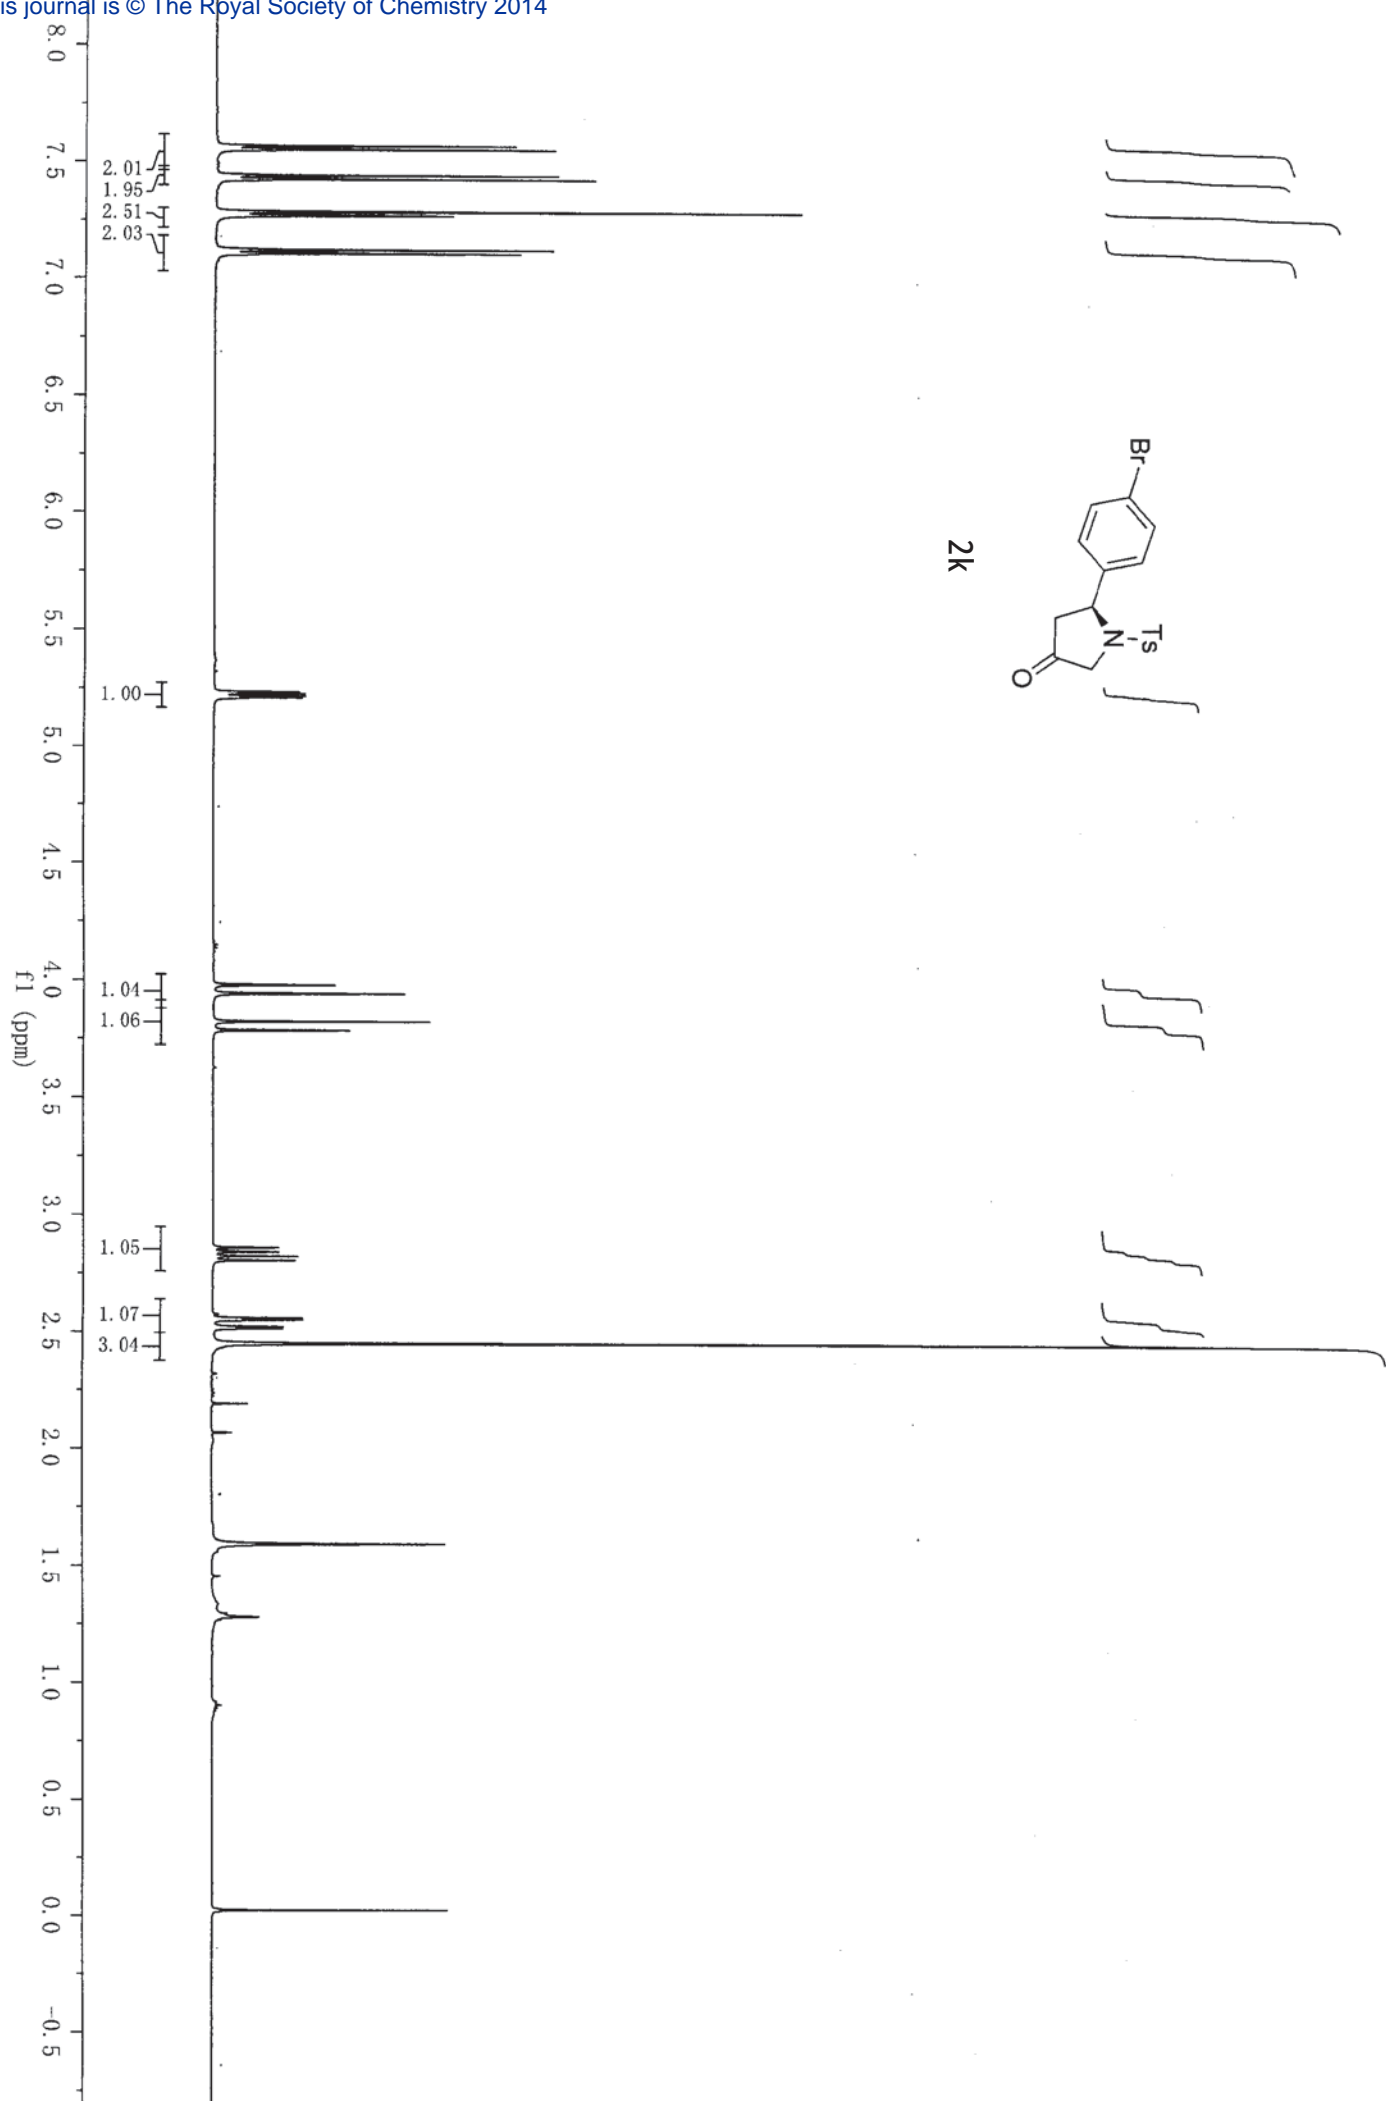



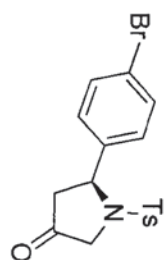

2k

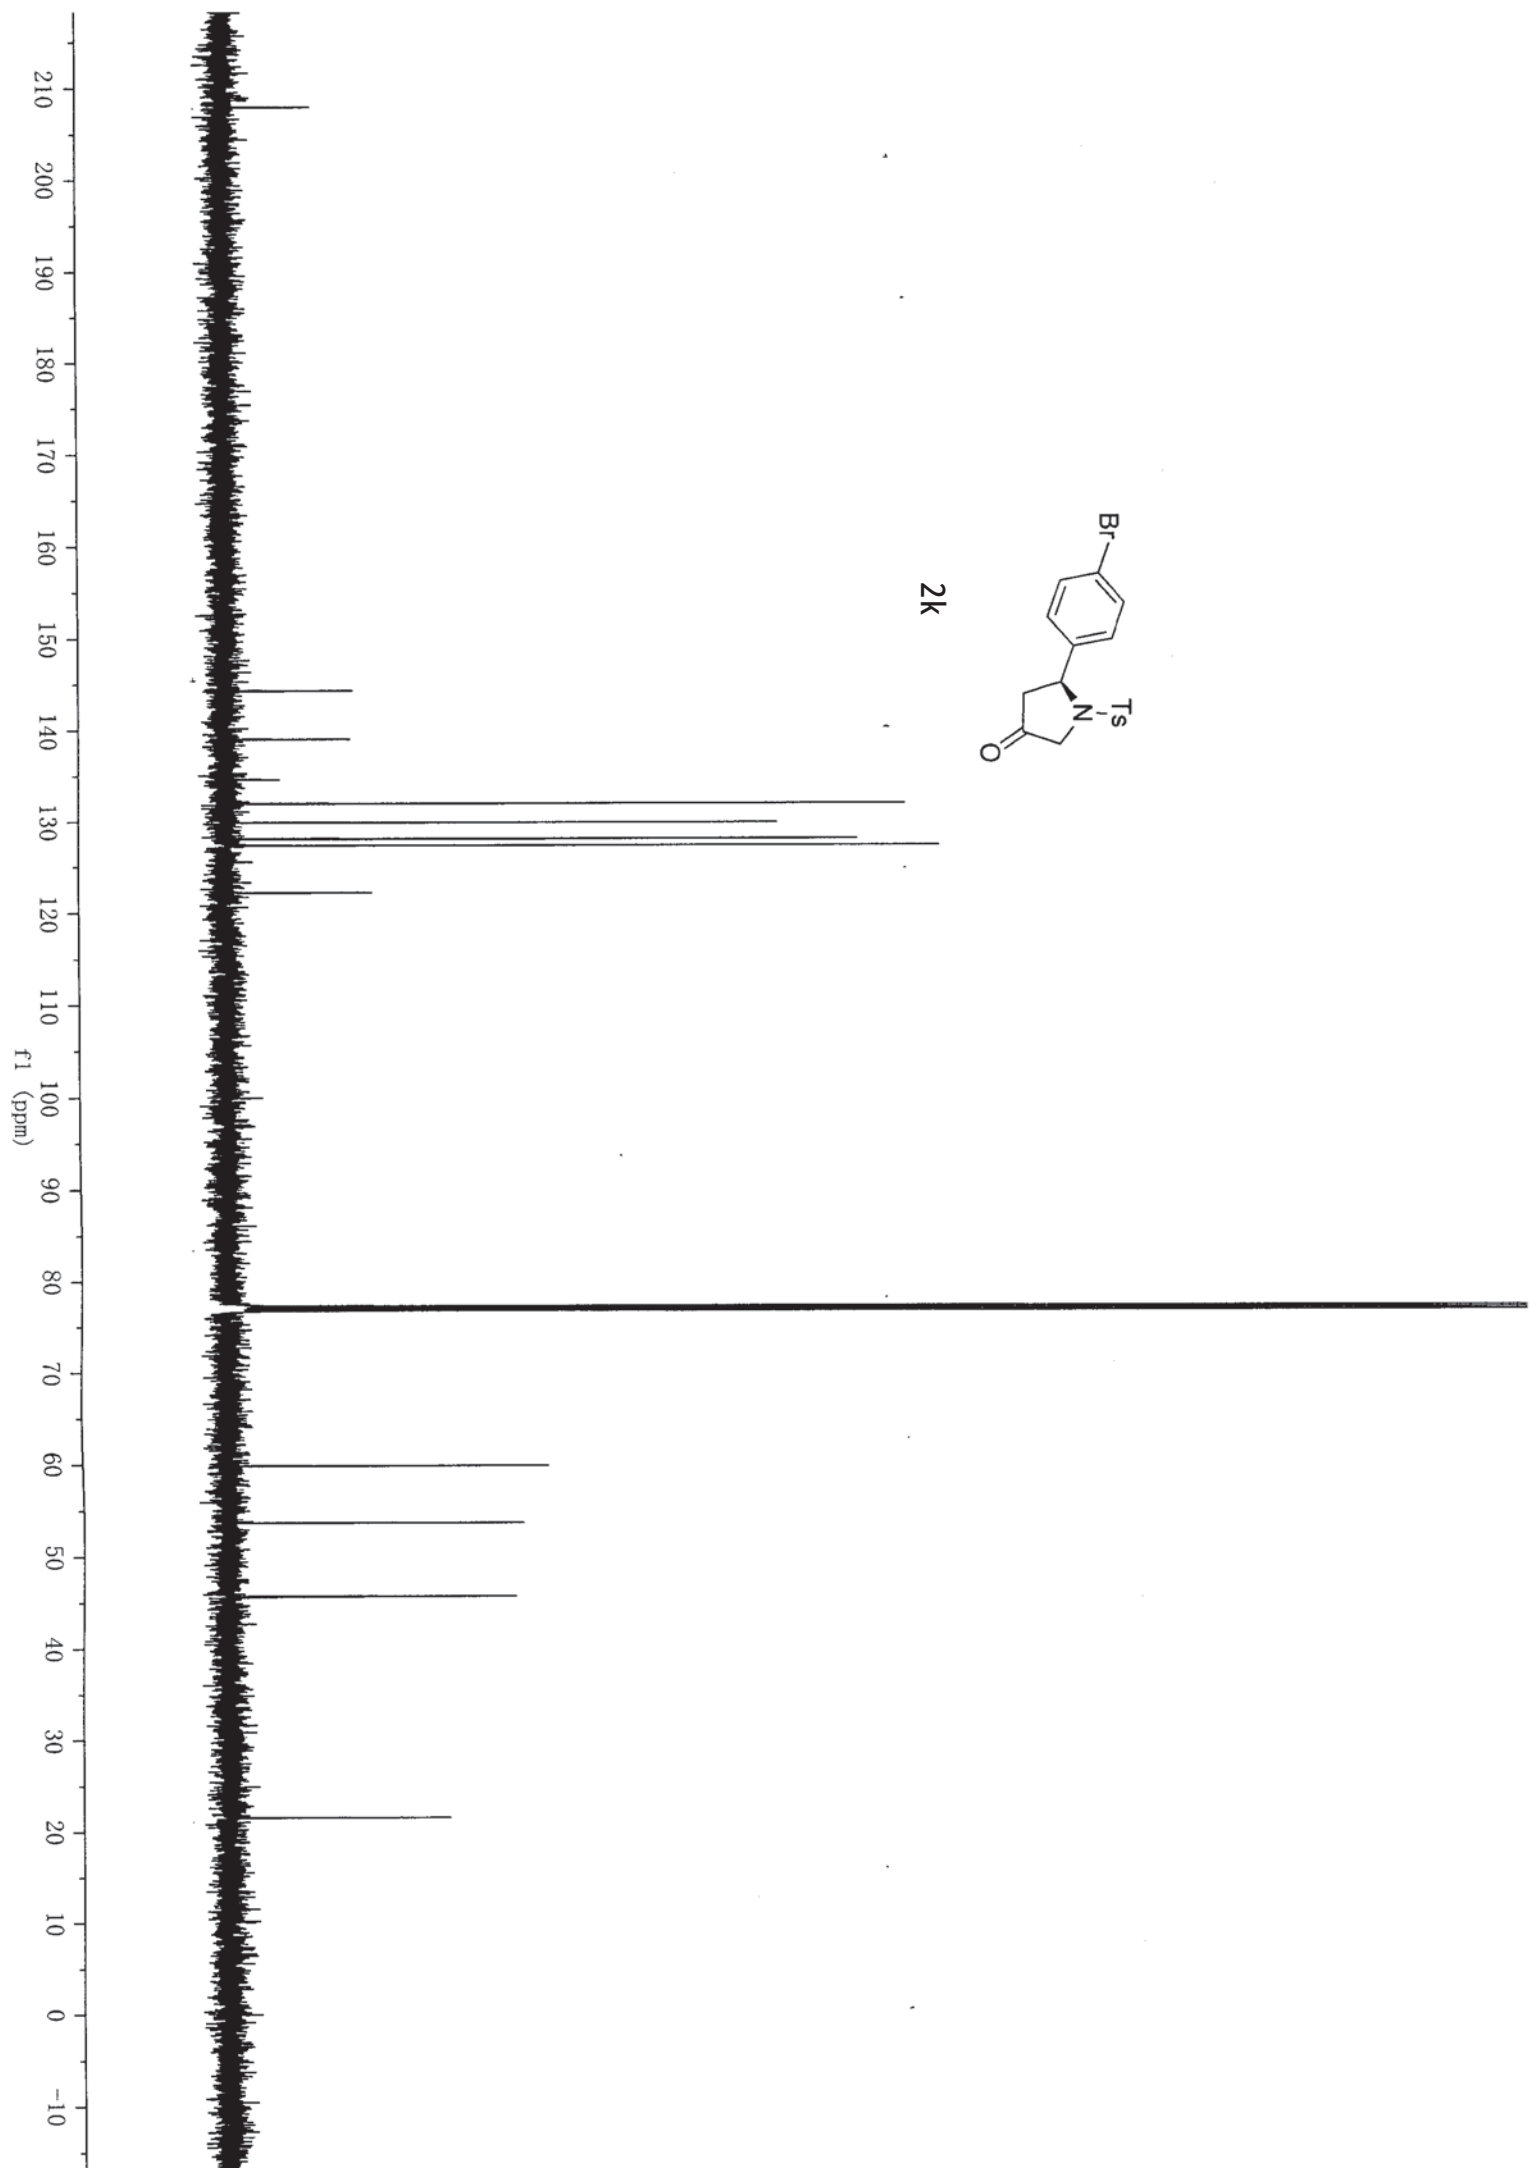

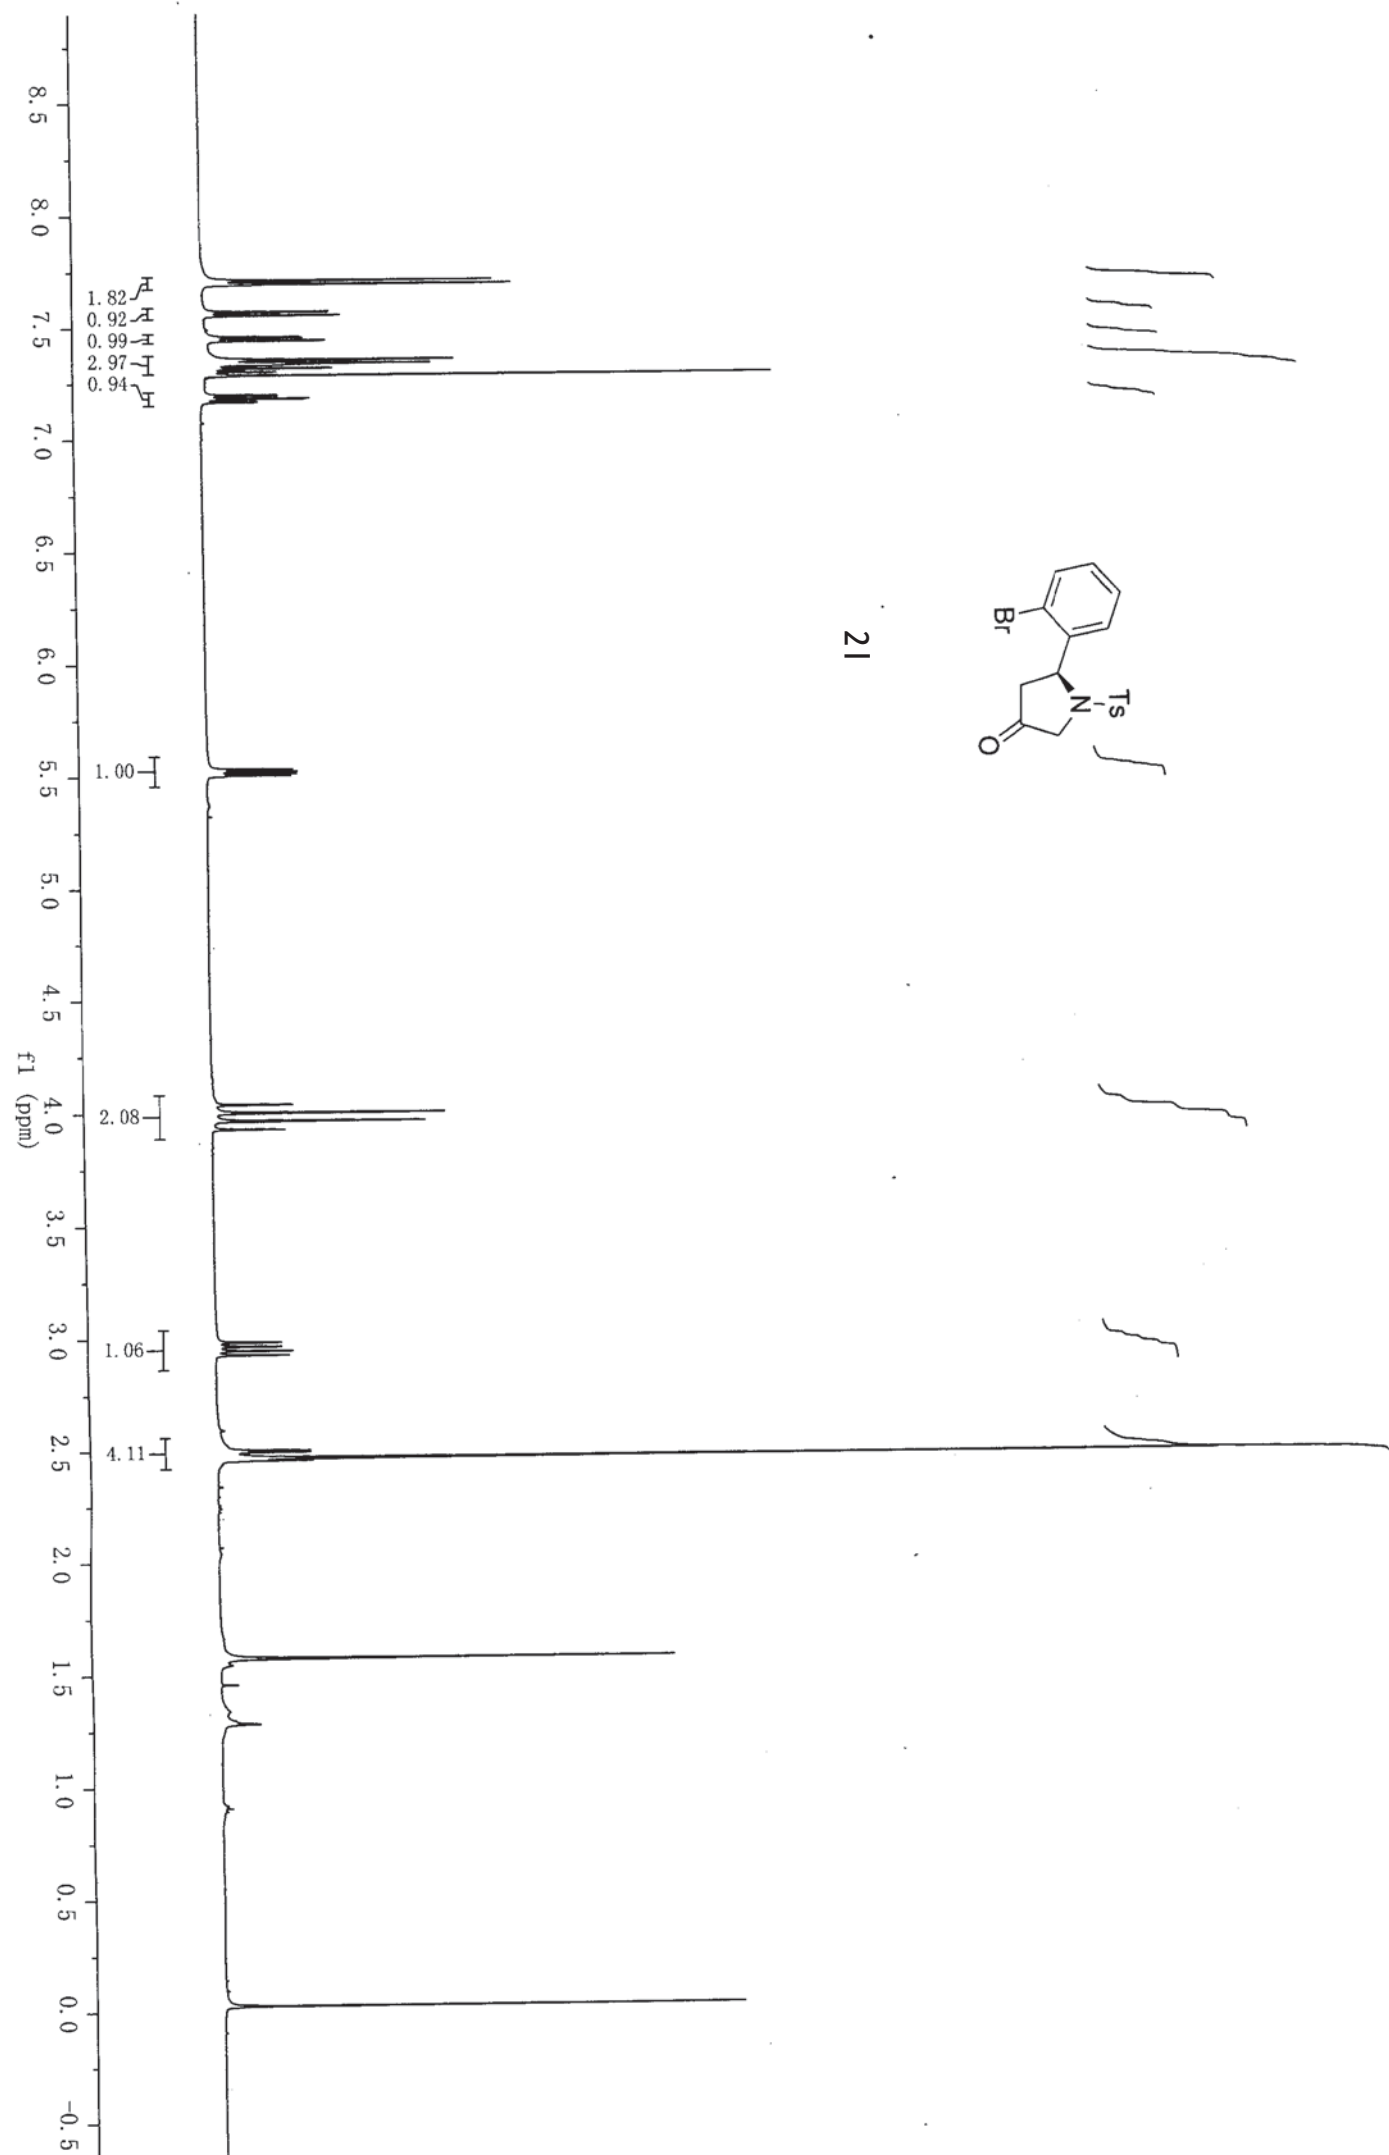

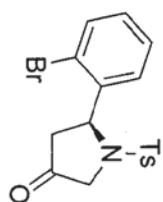

21

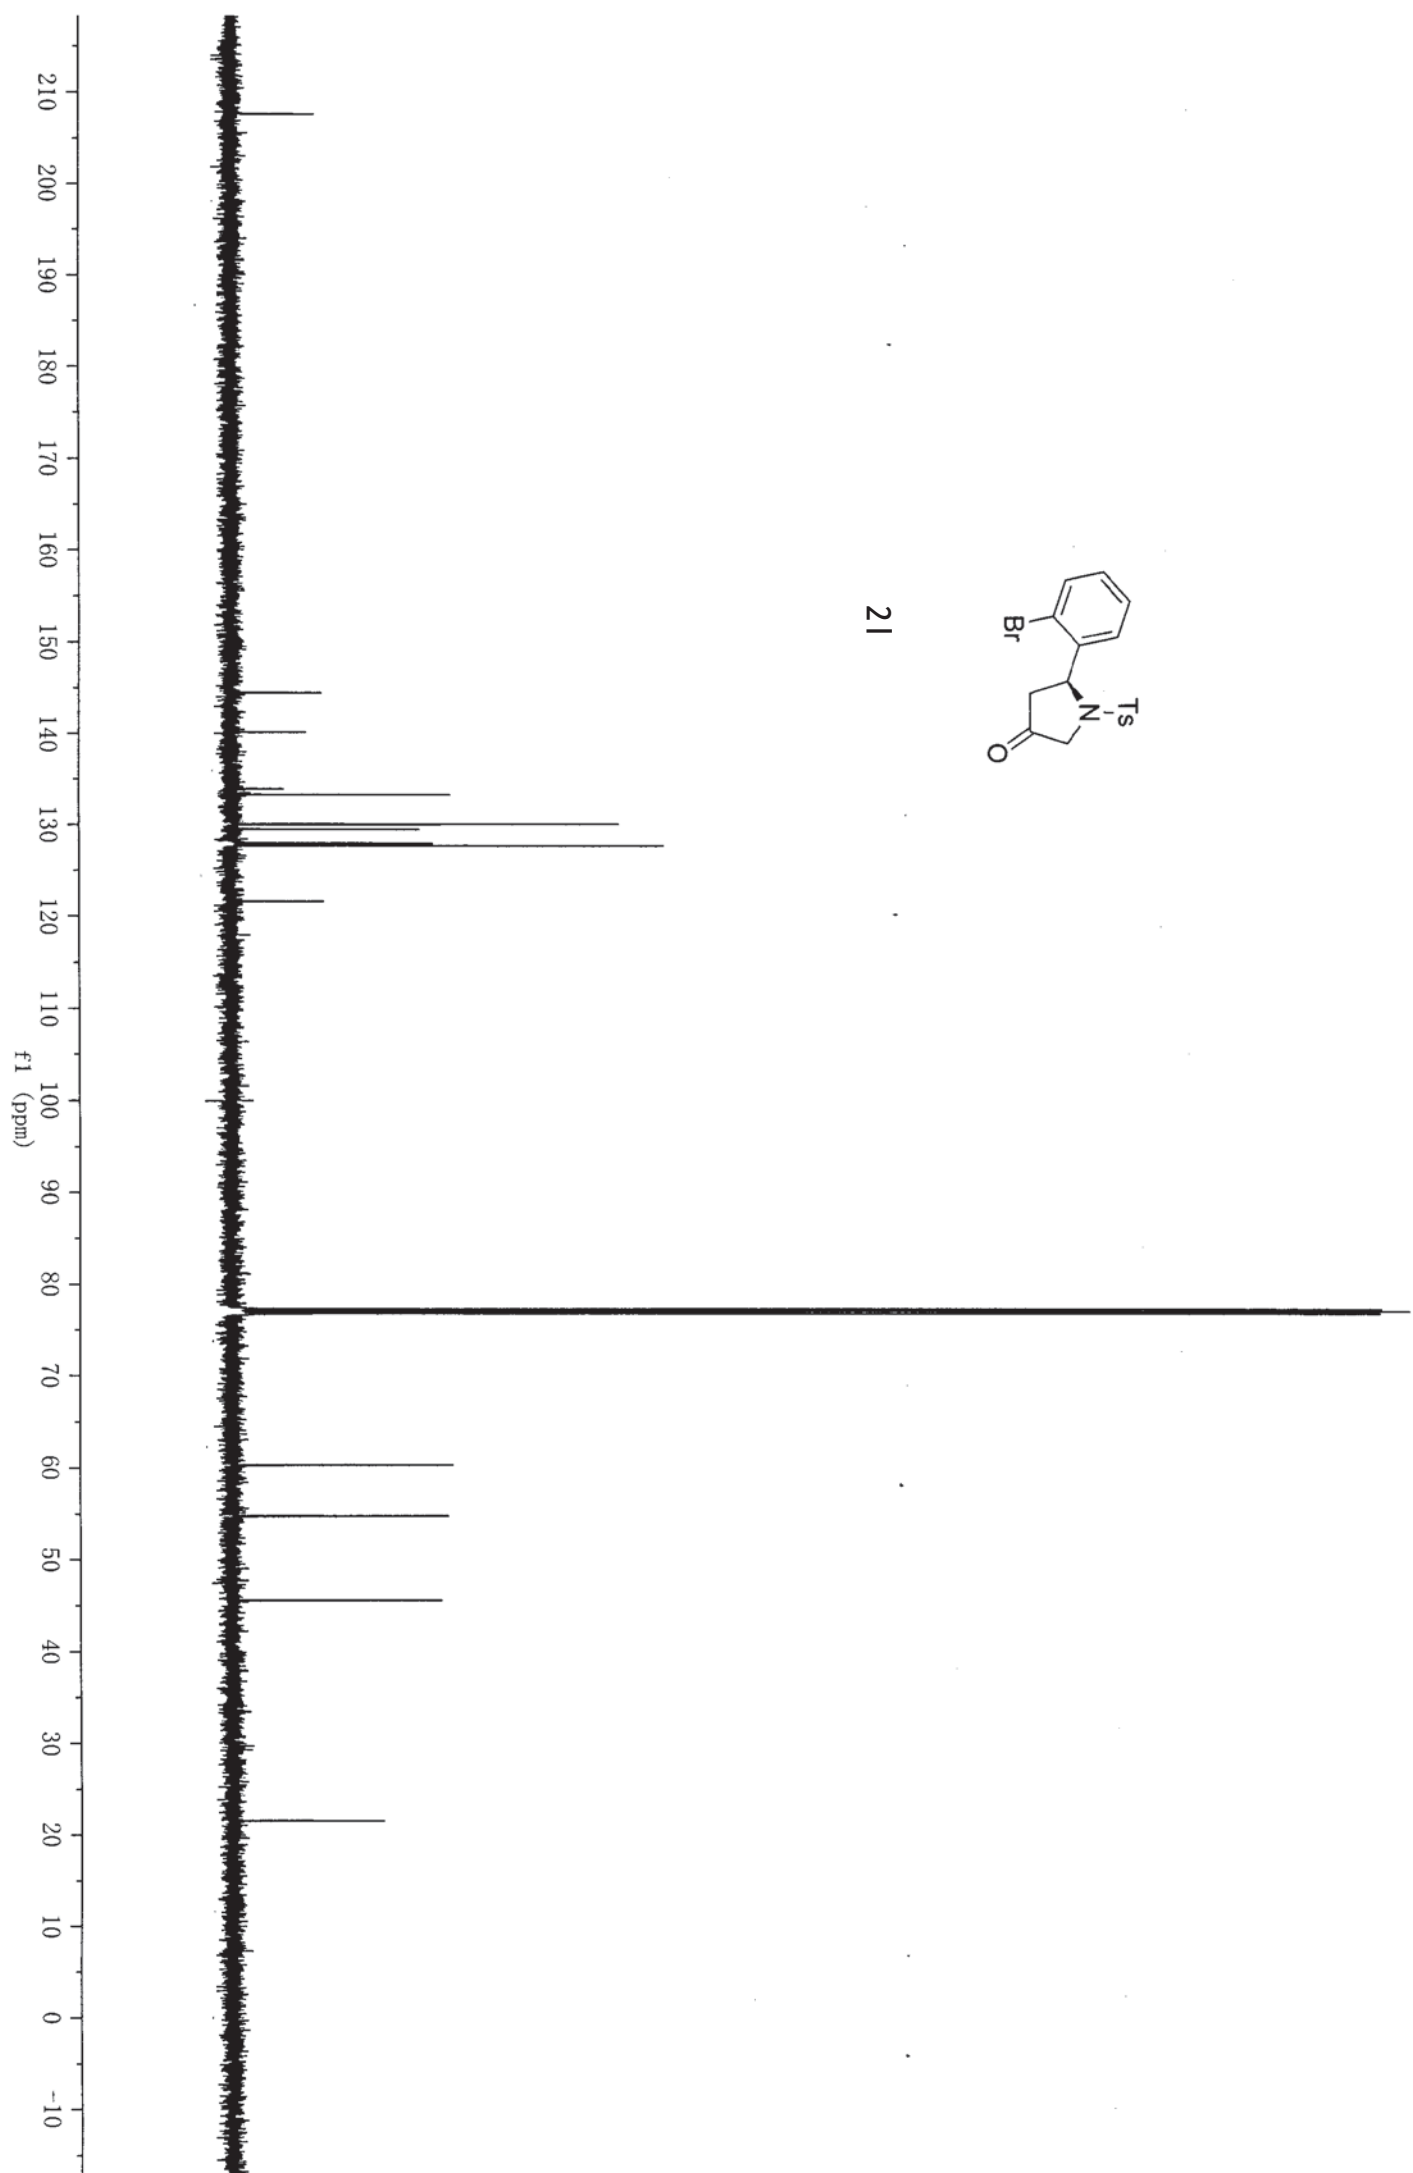

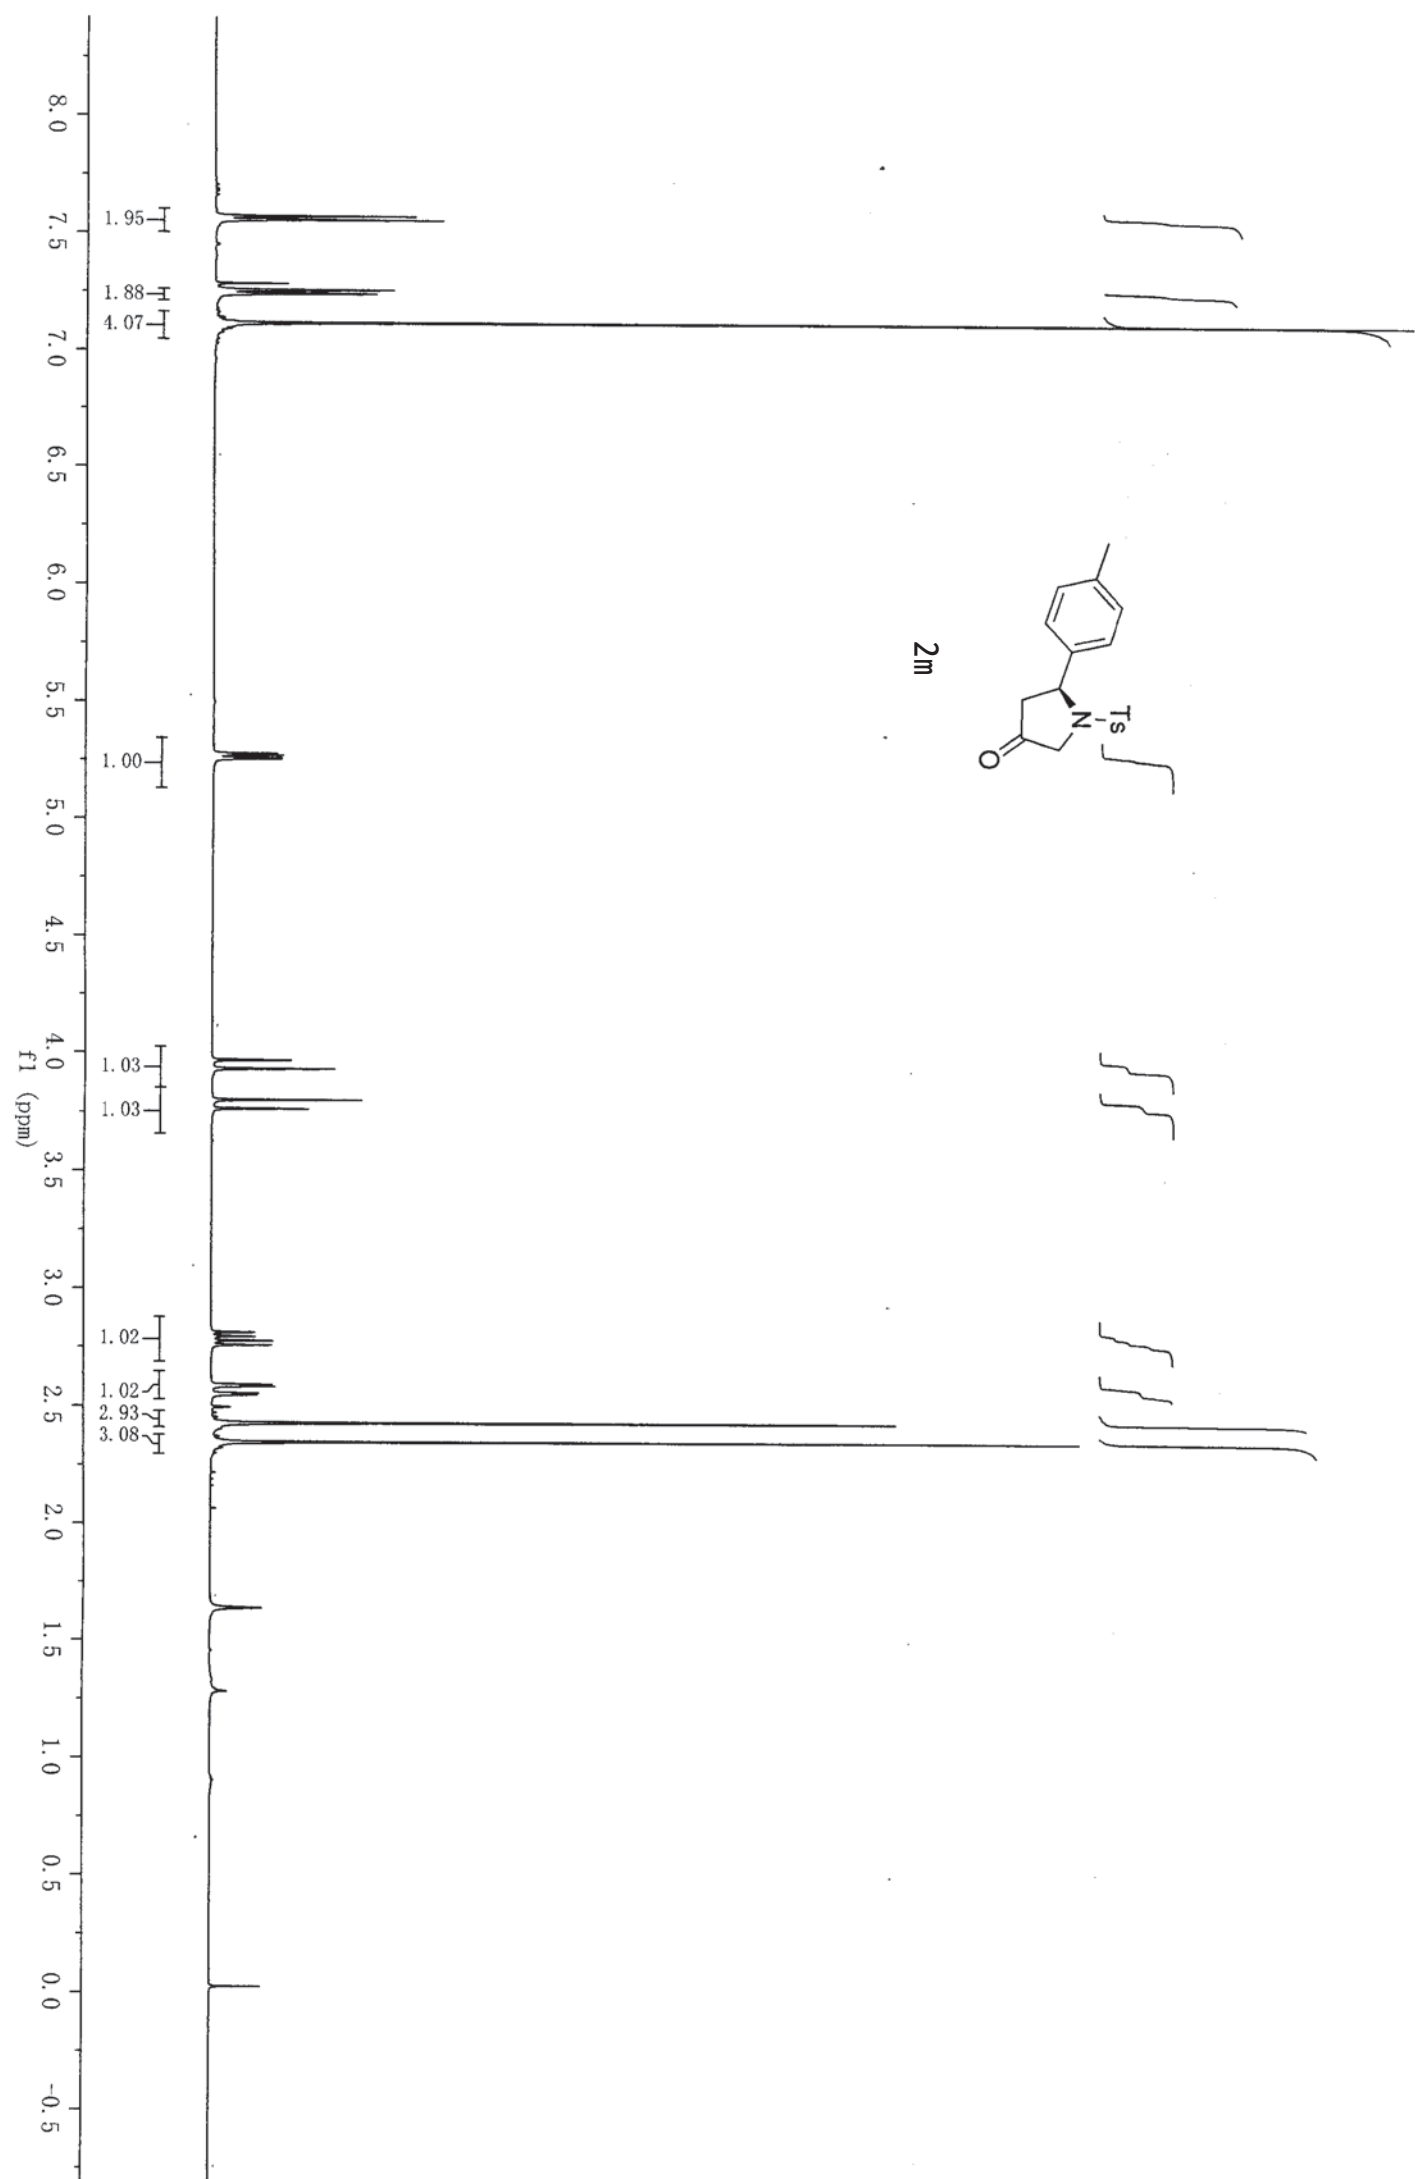

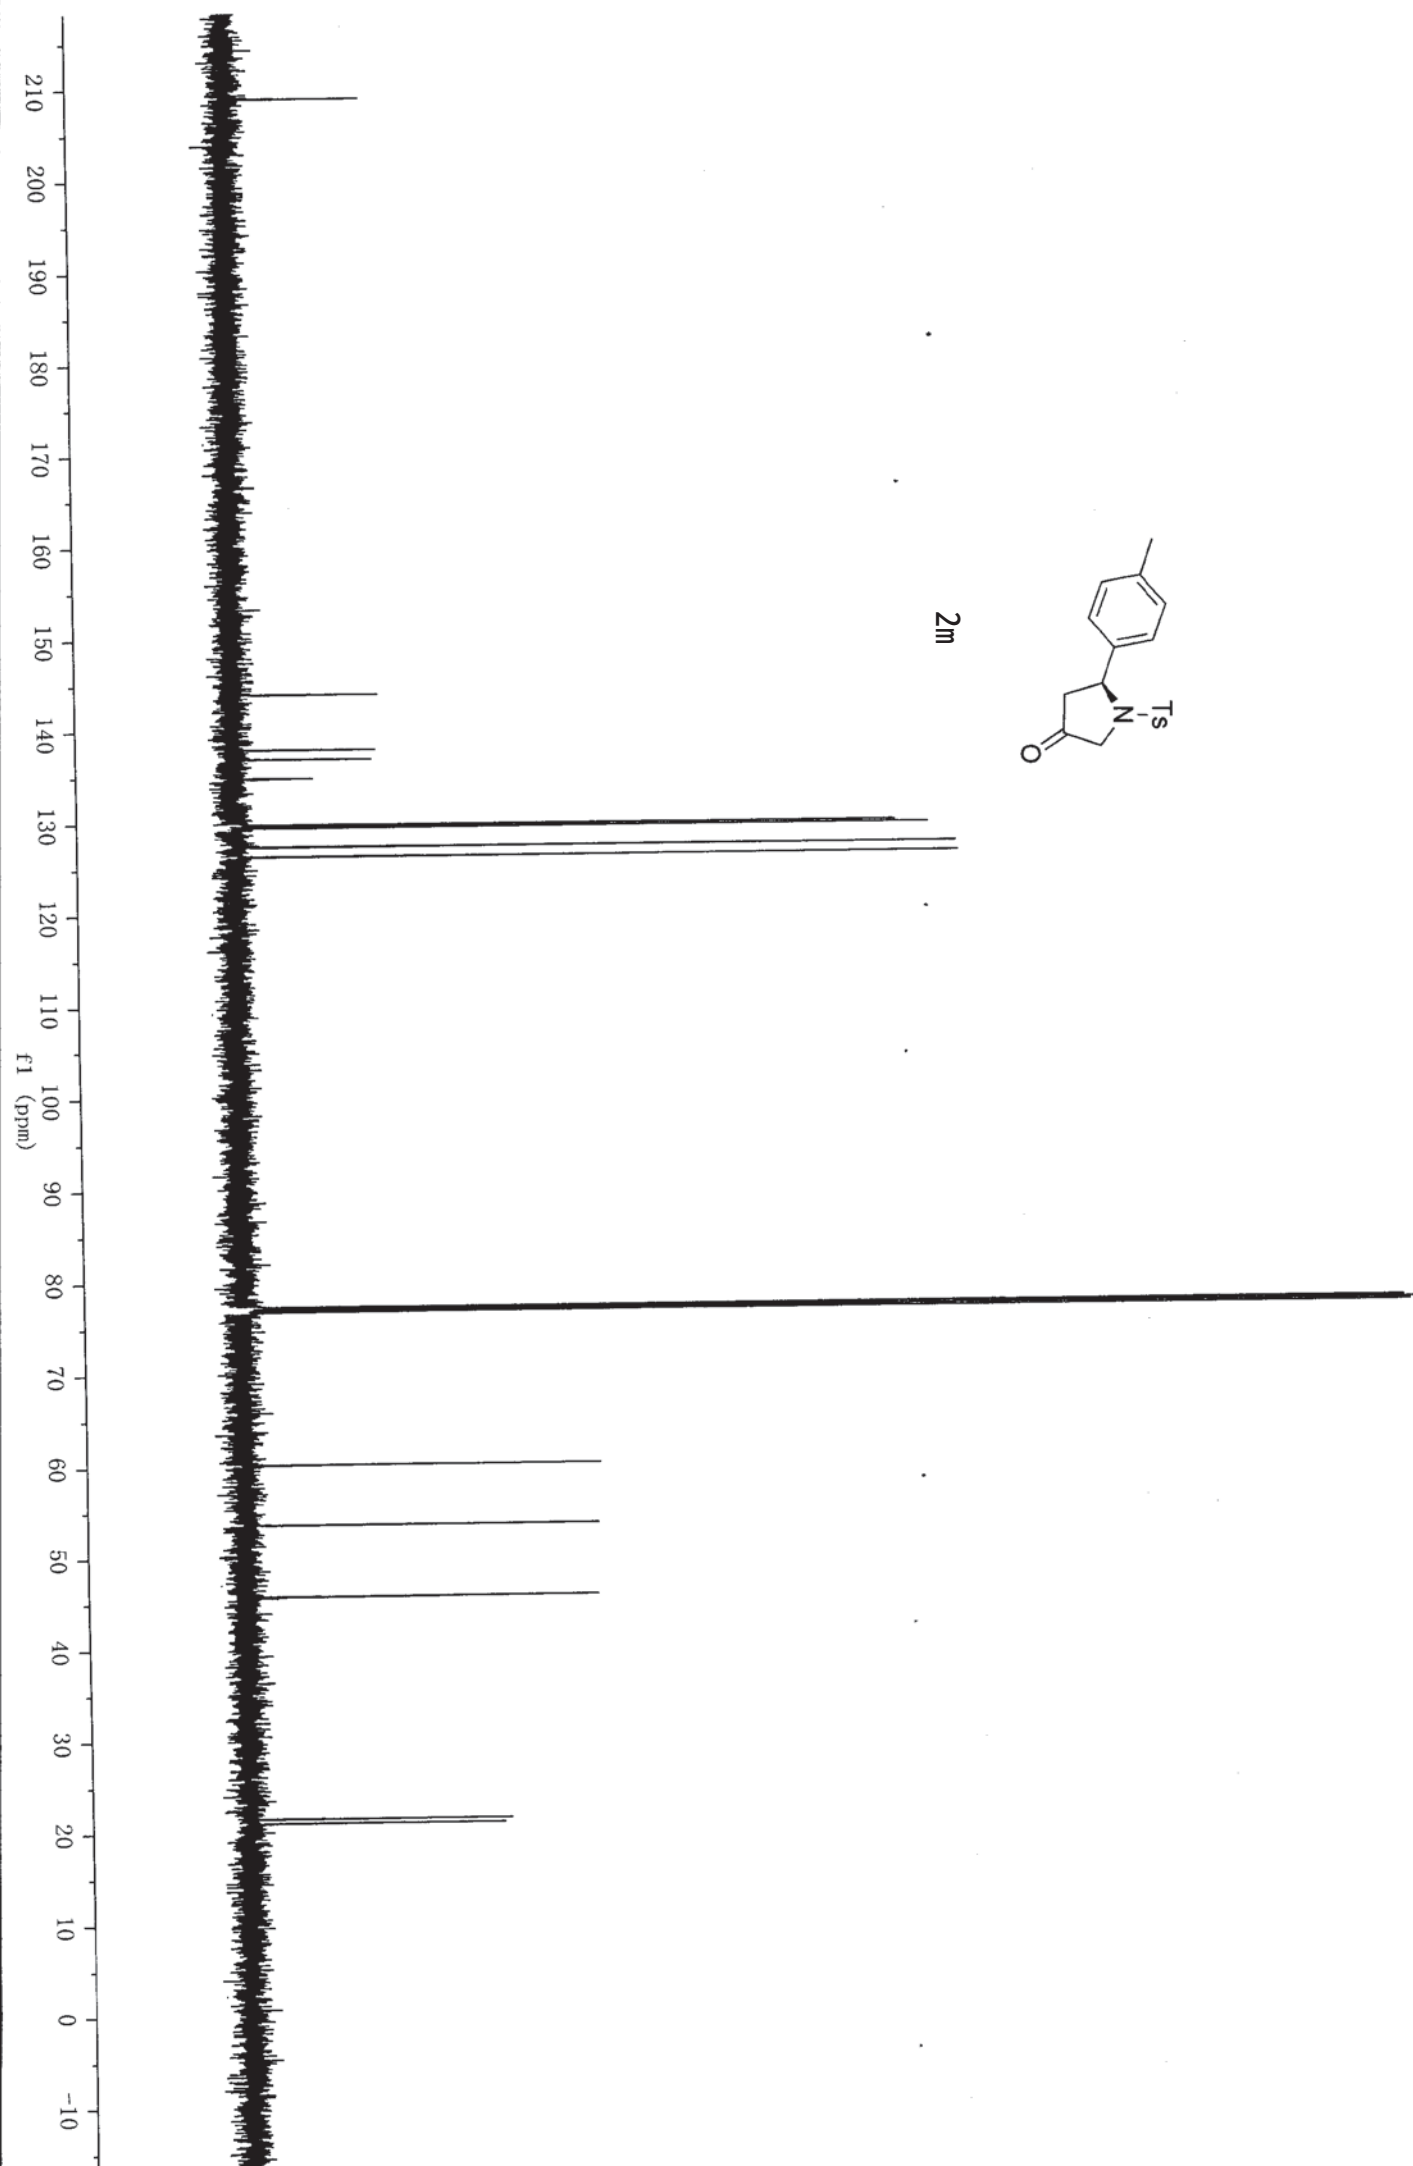

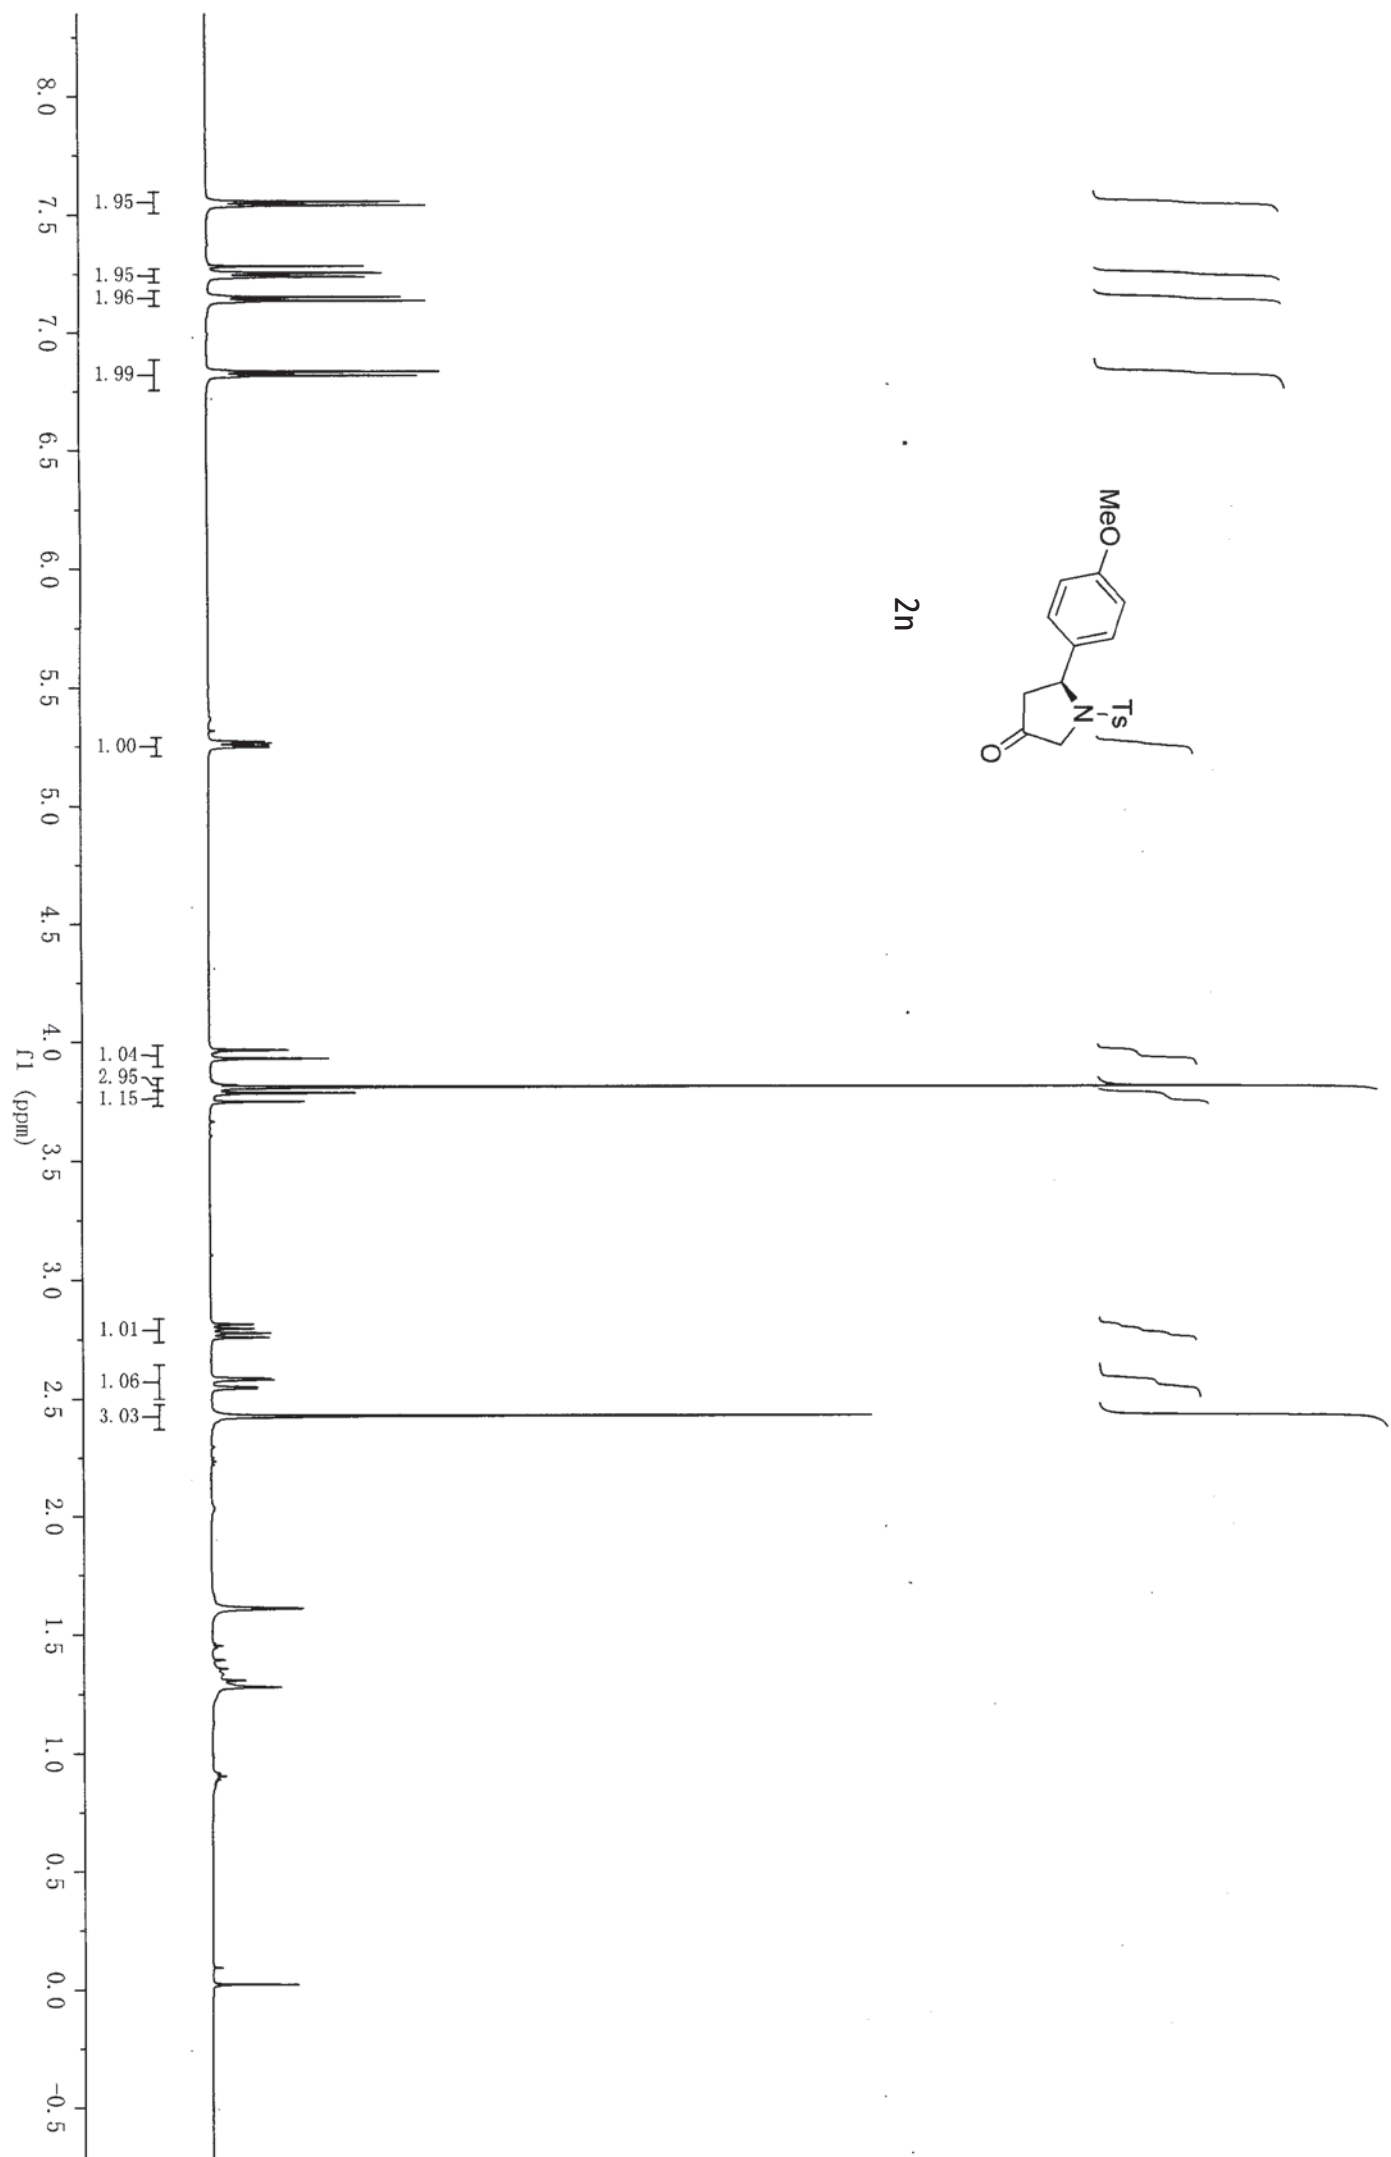

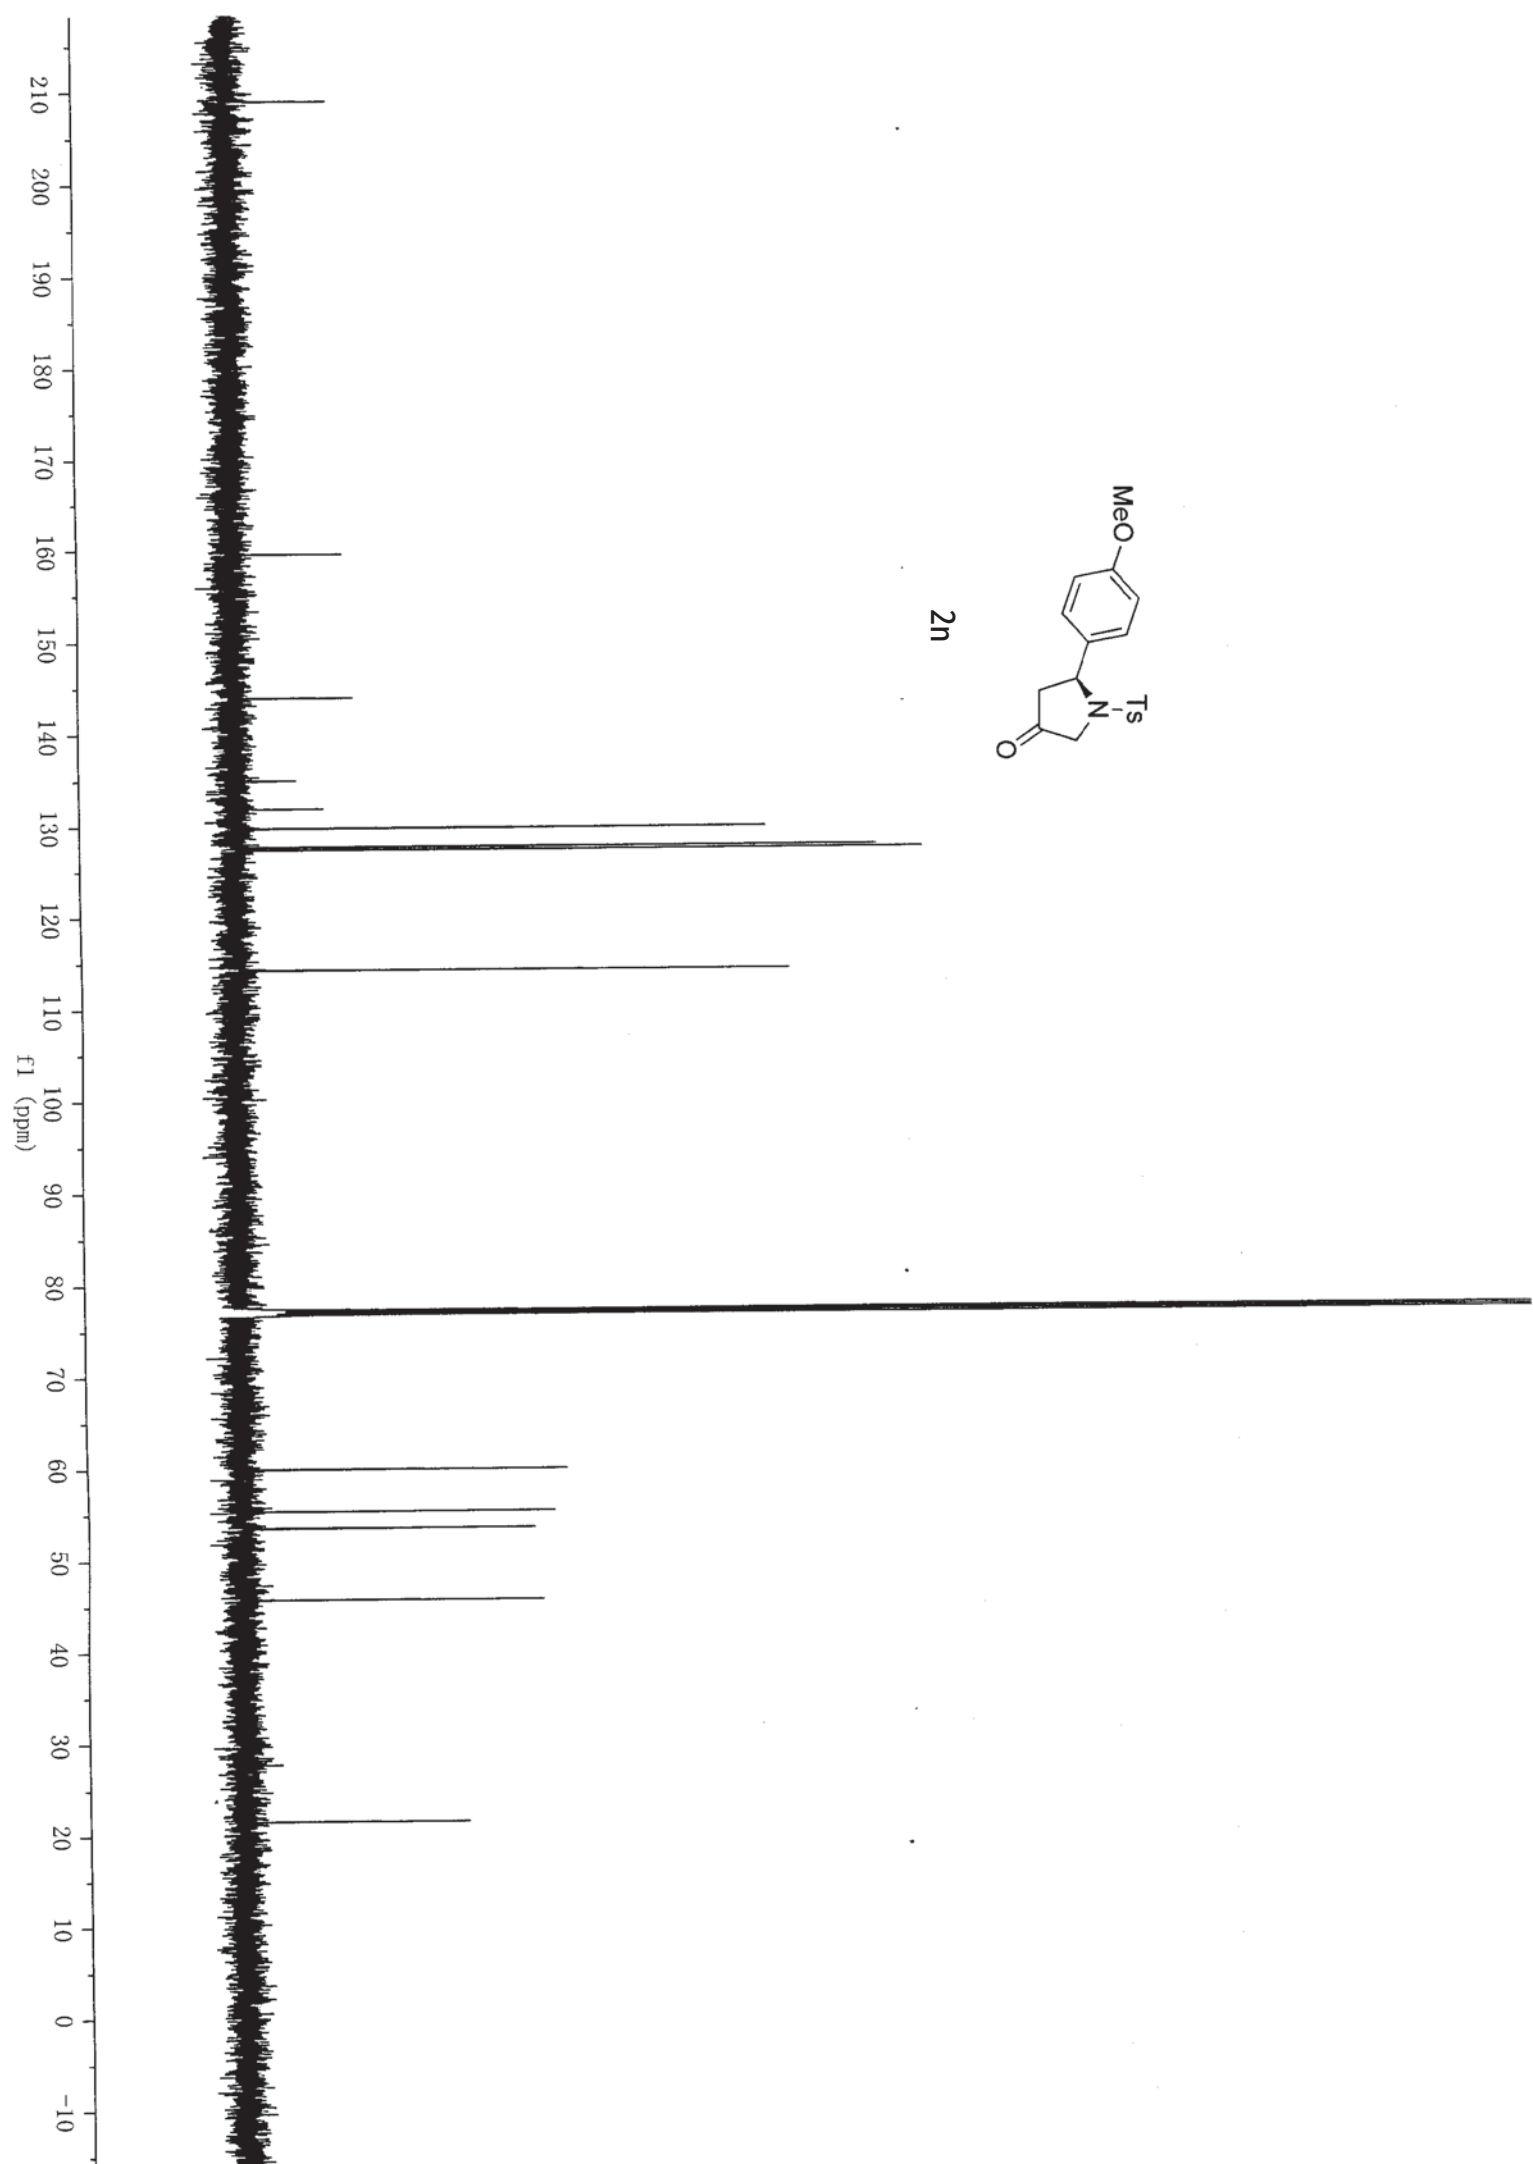

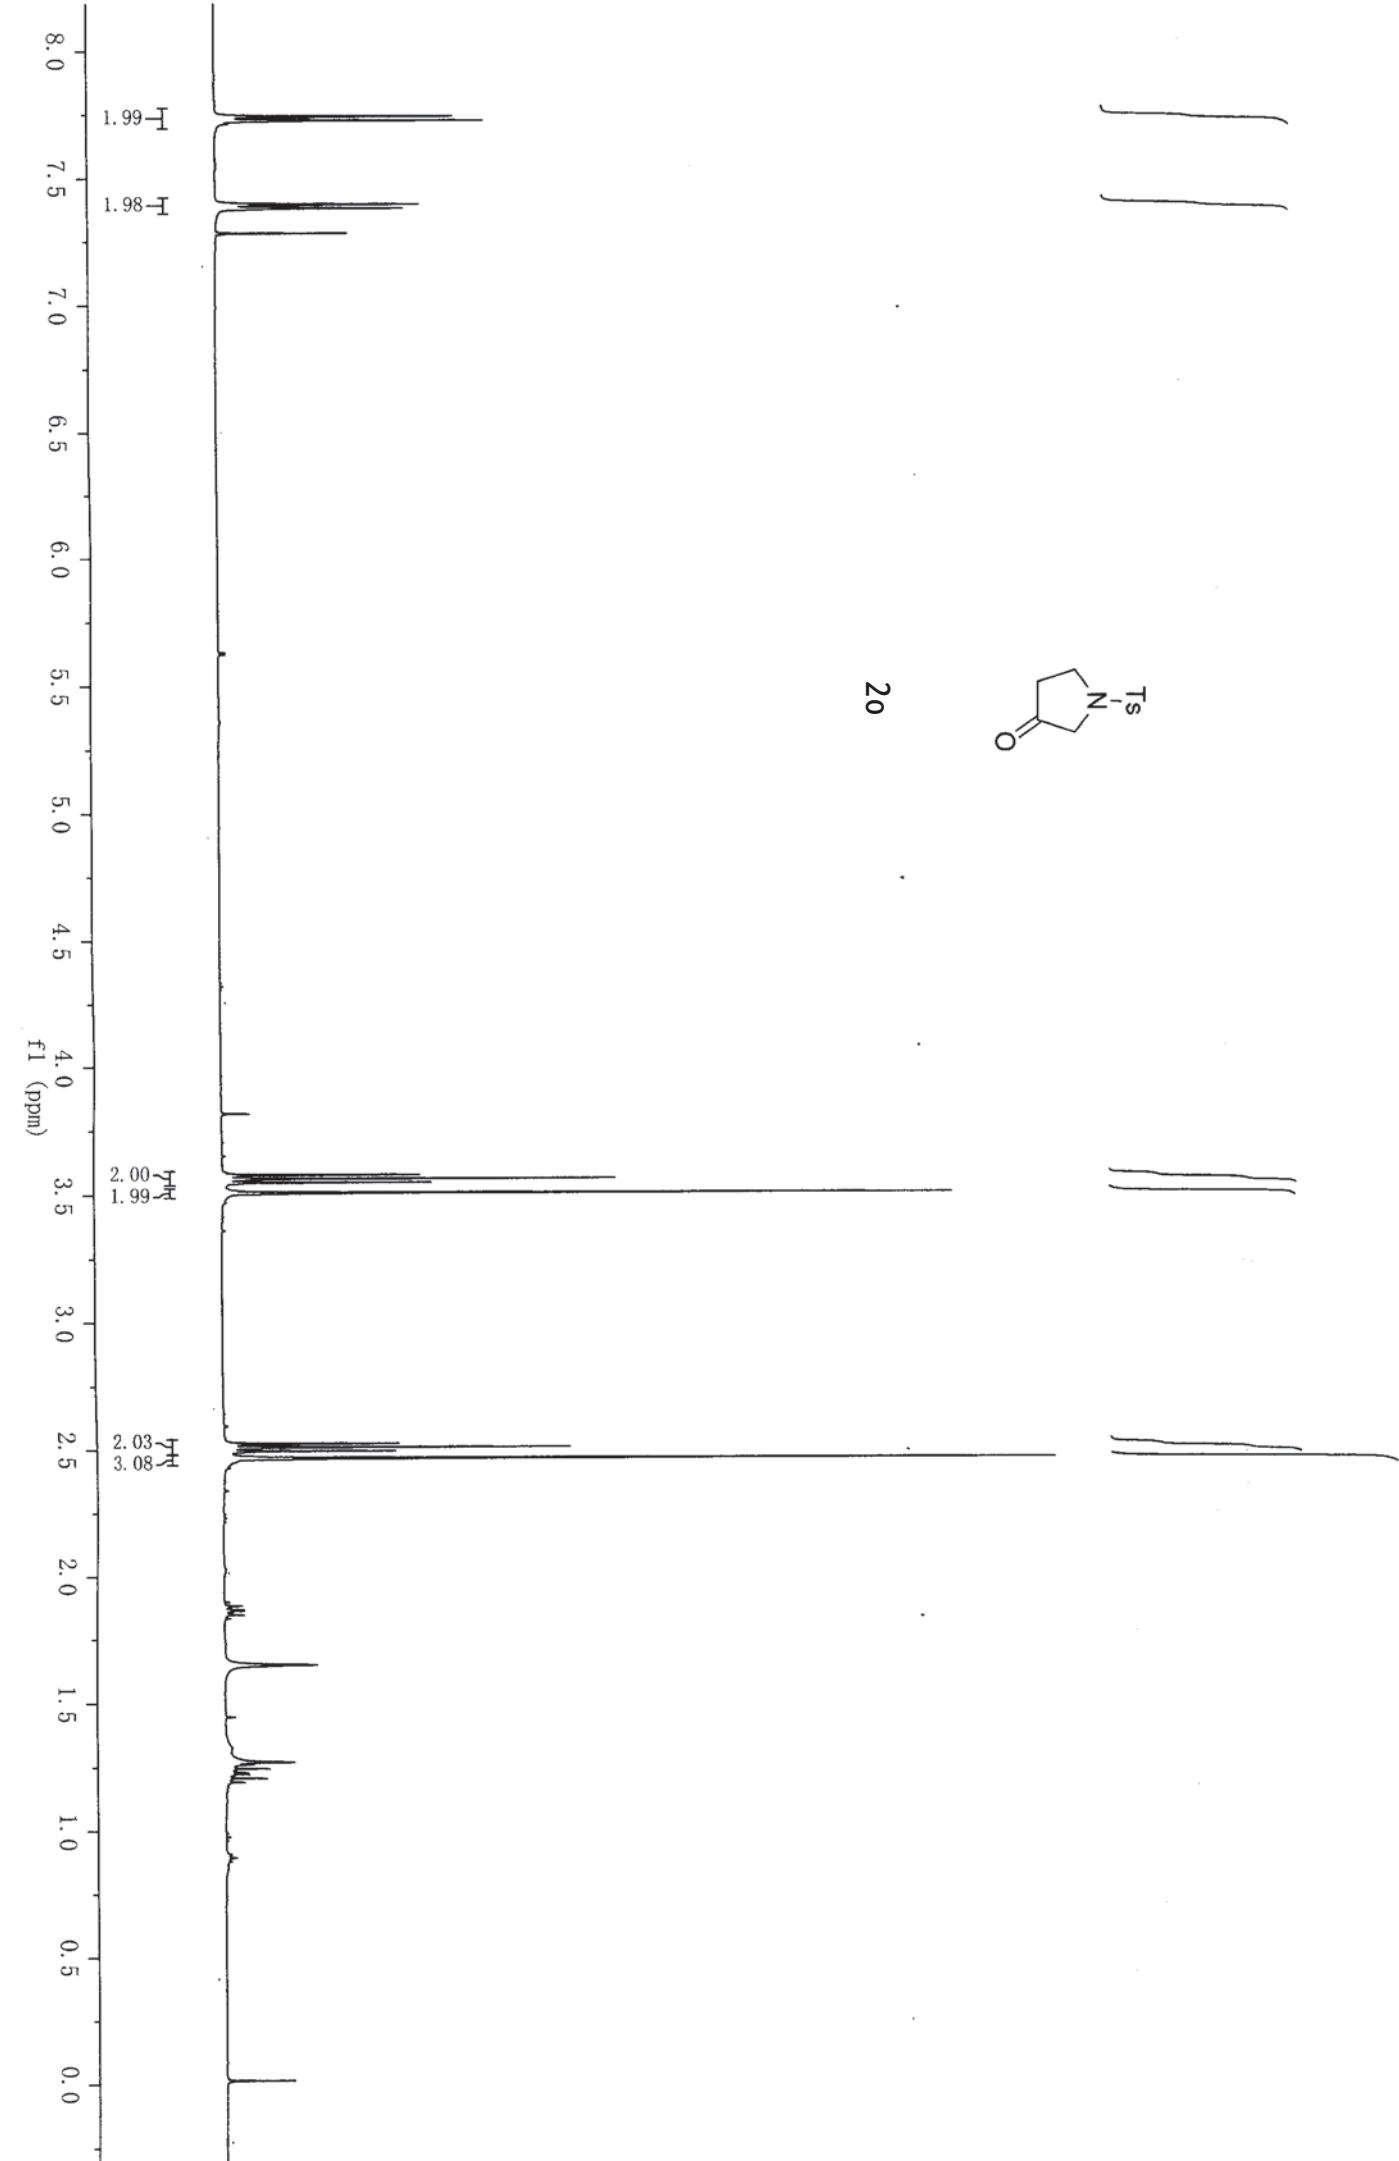



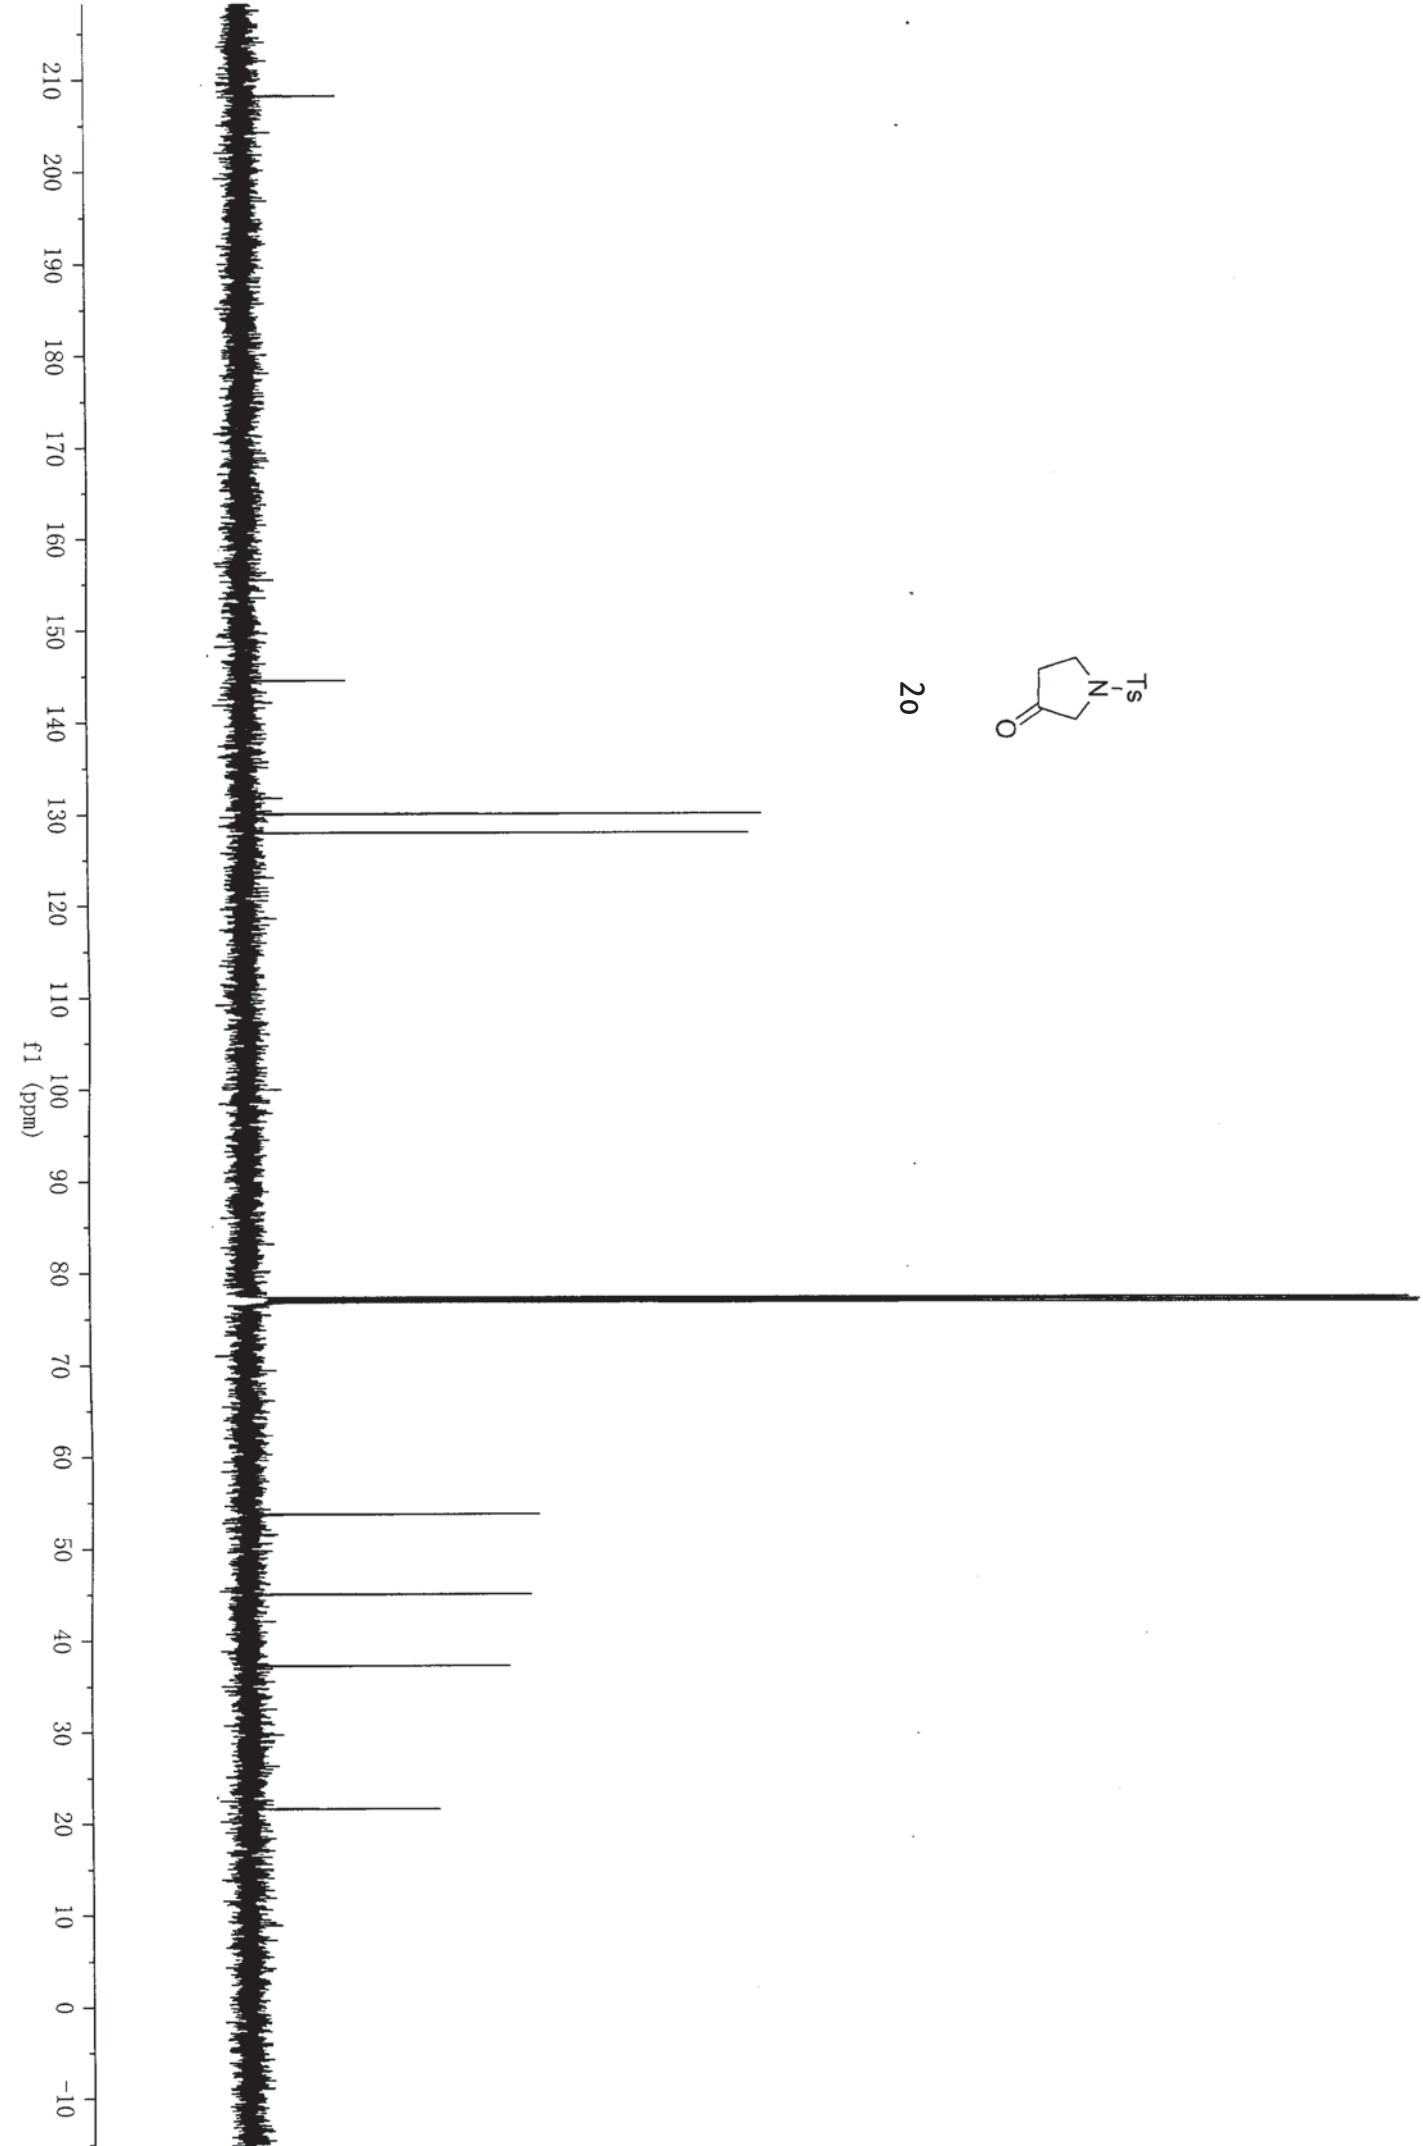

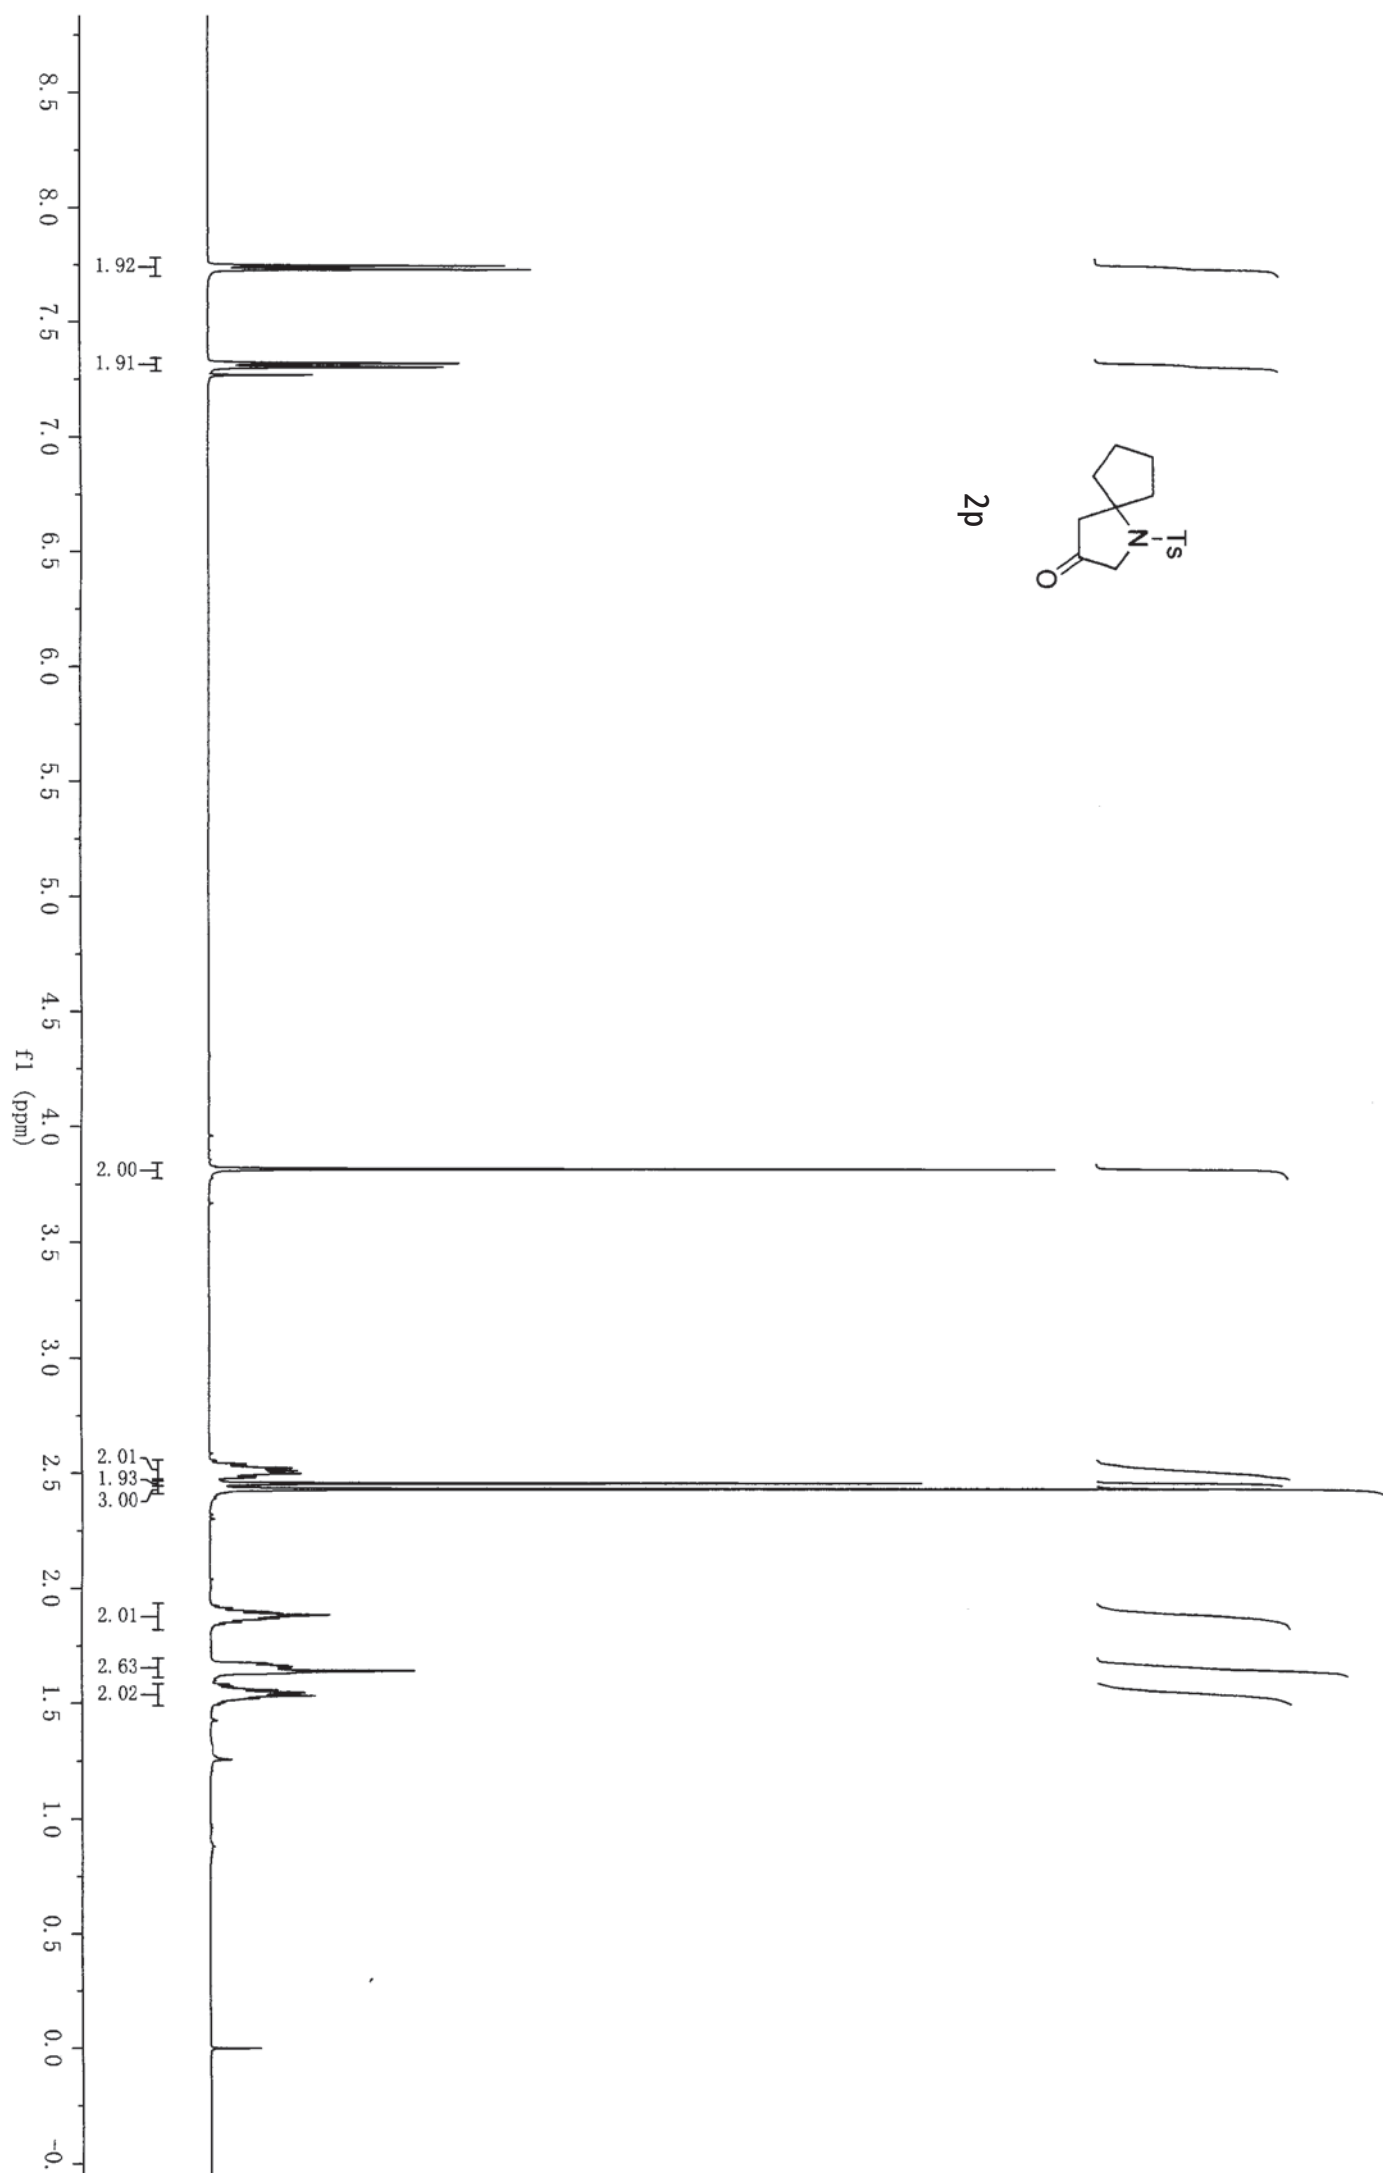

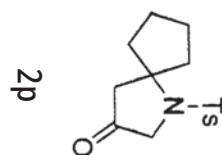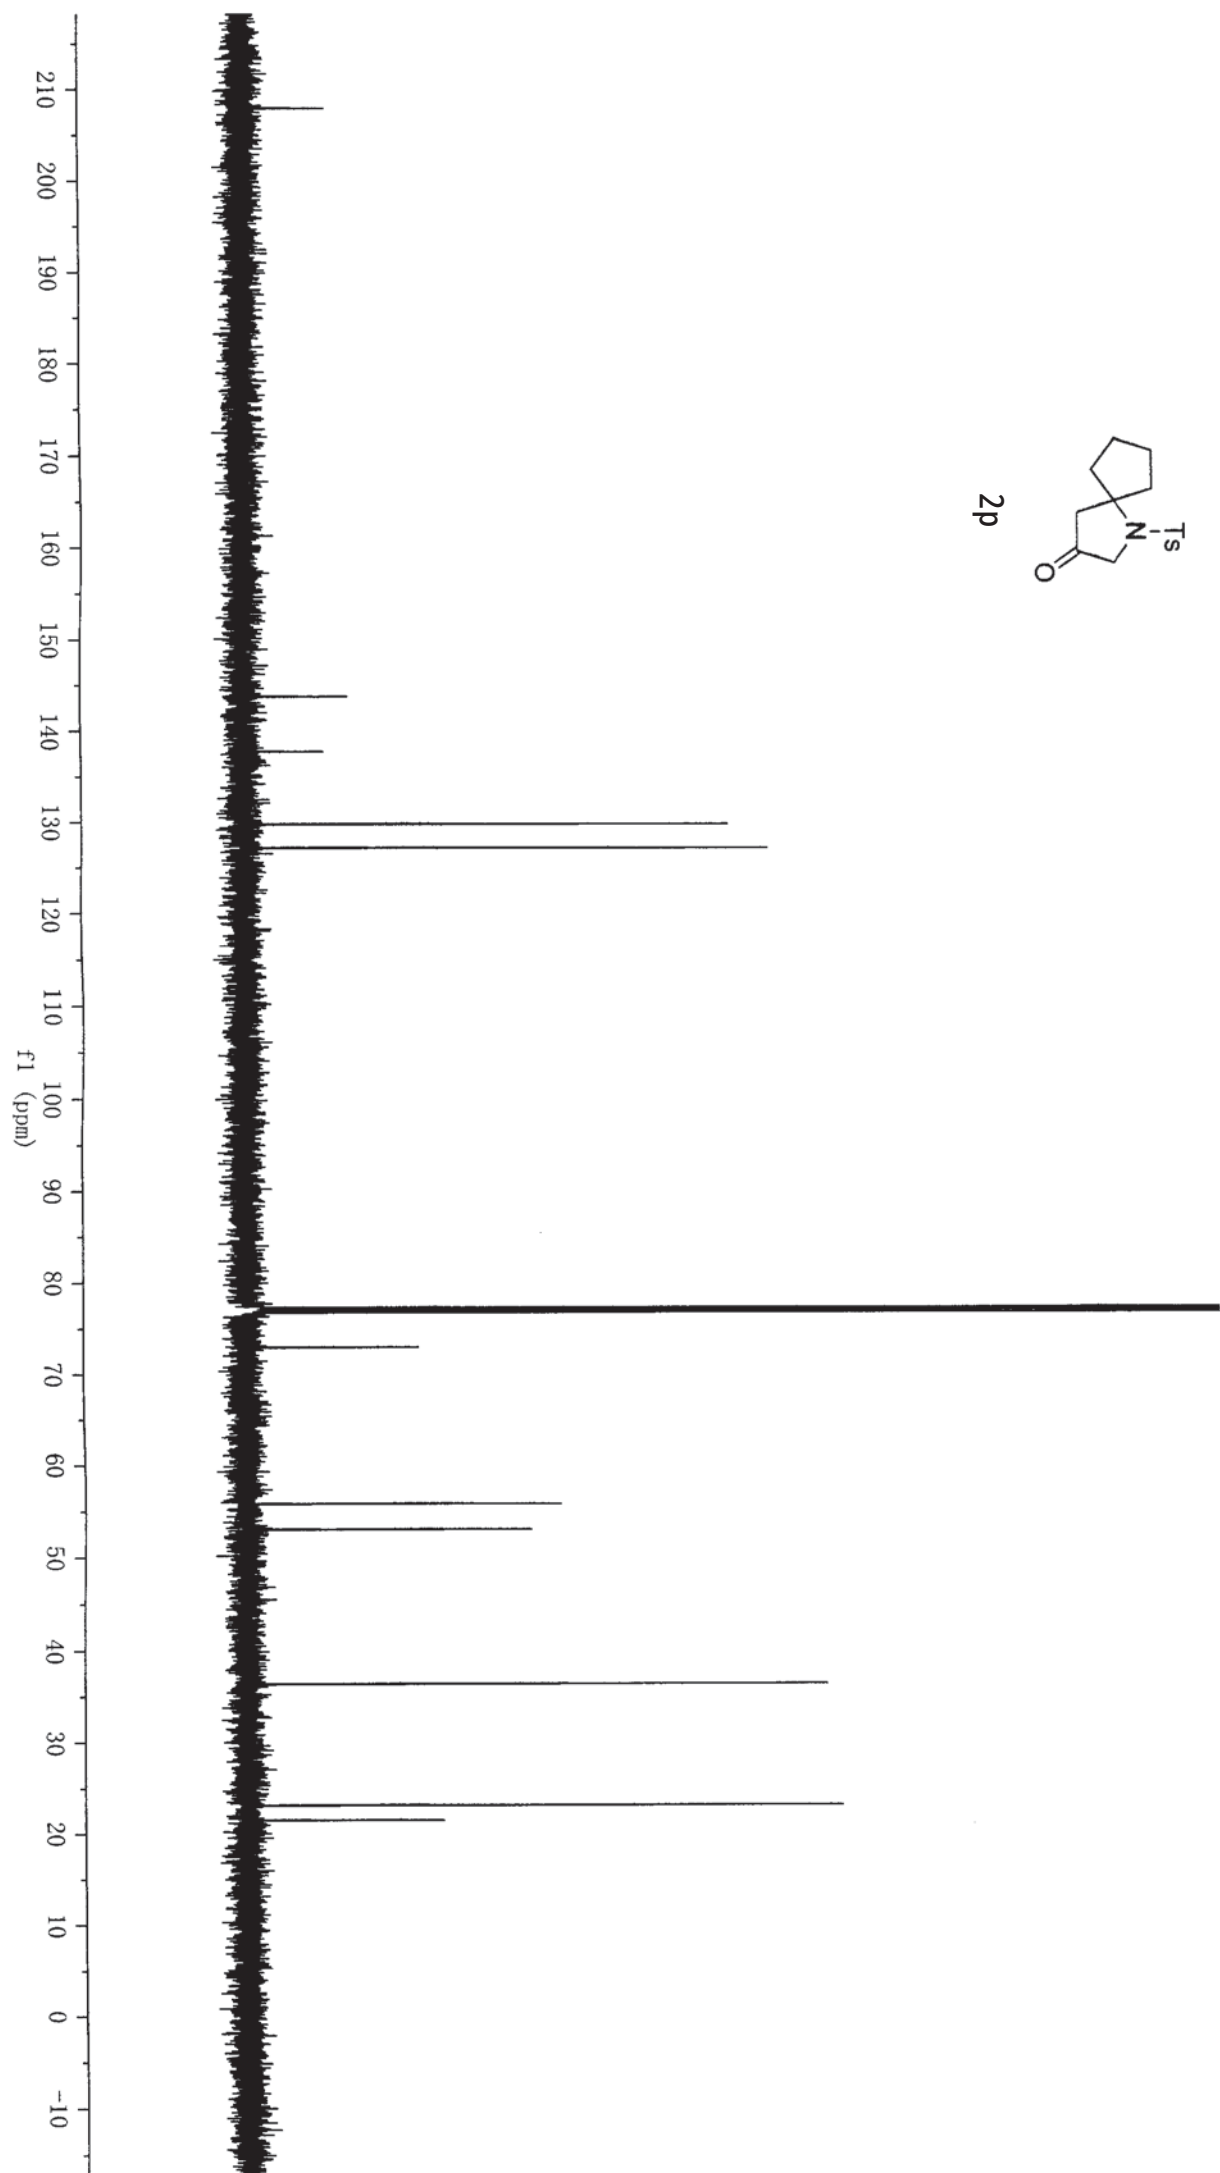

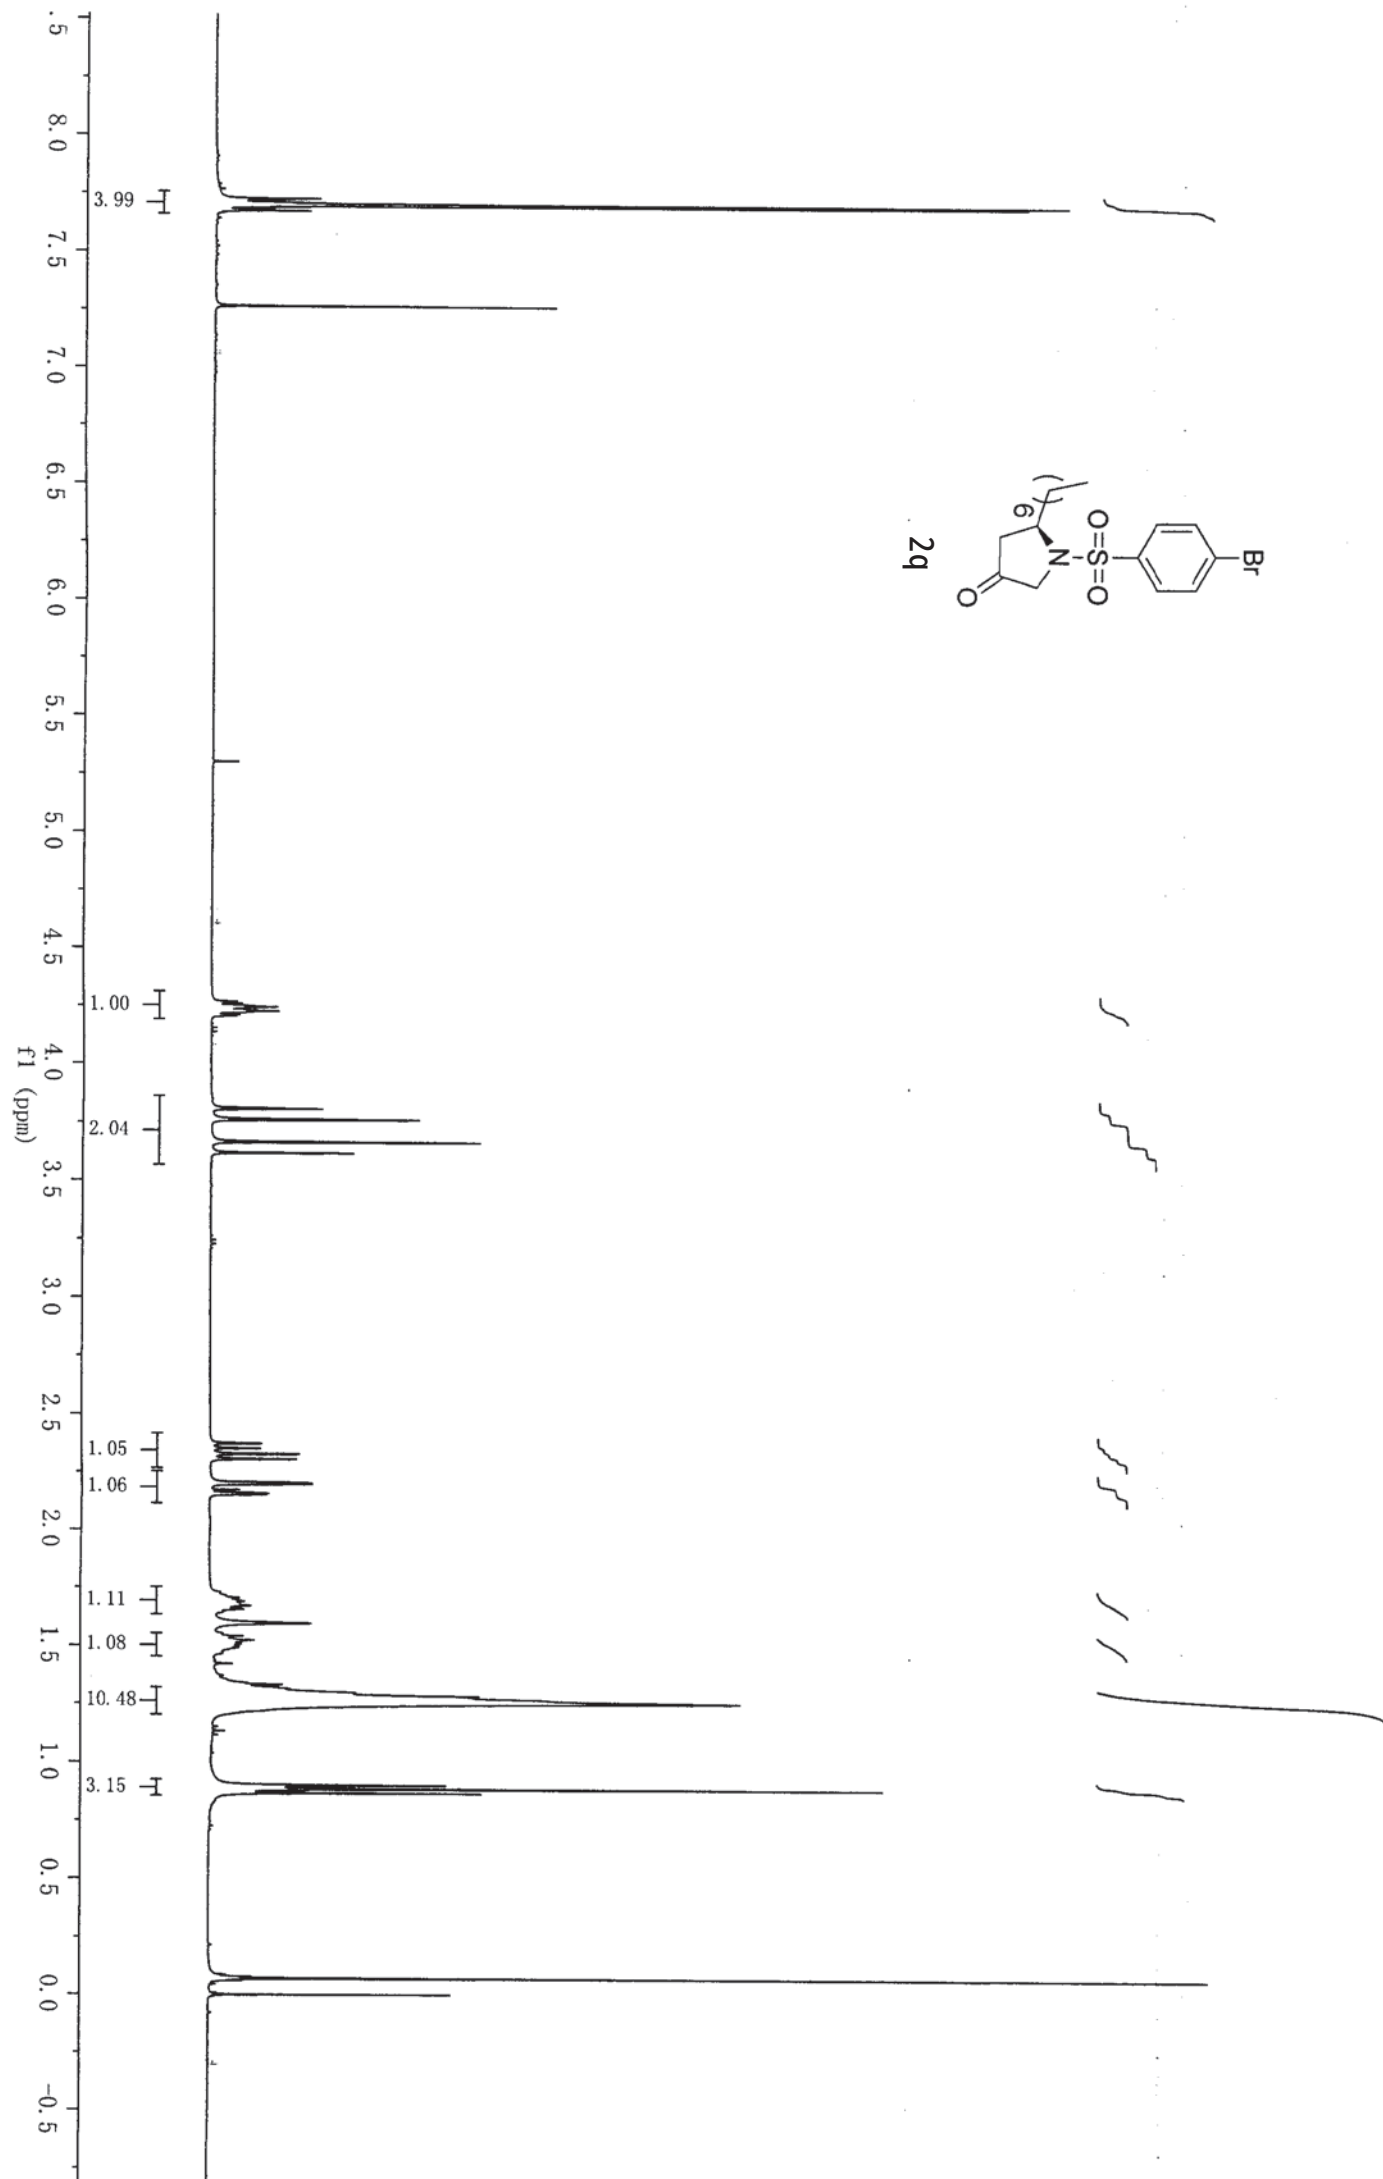

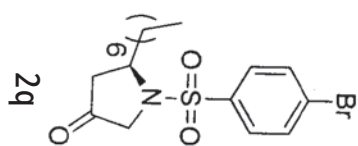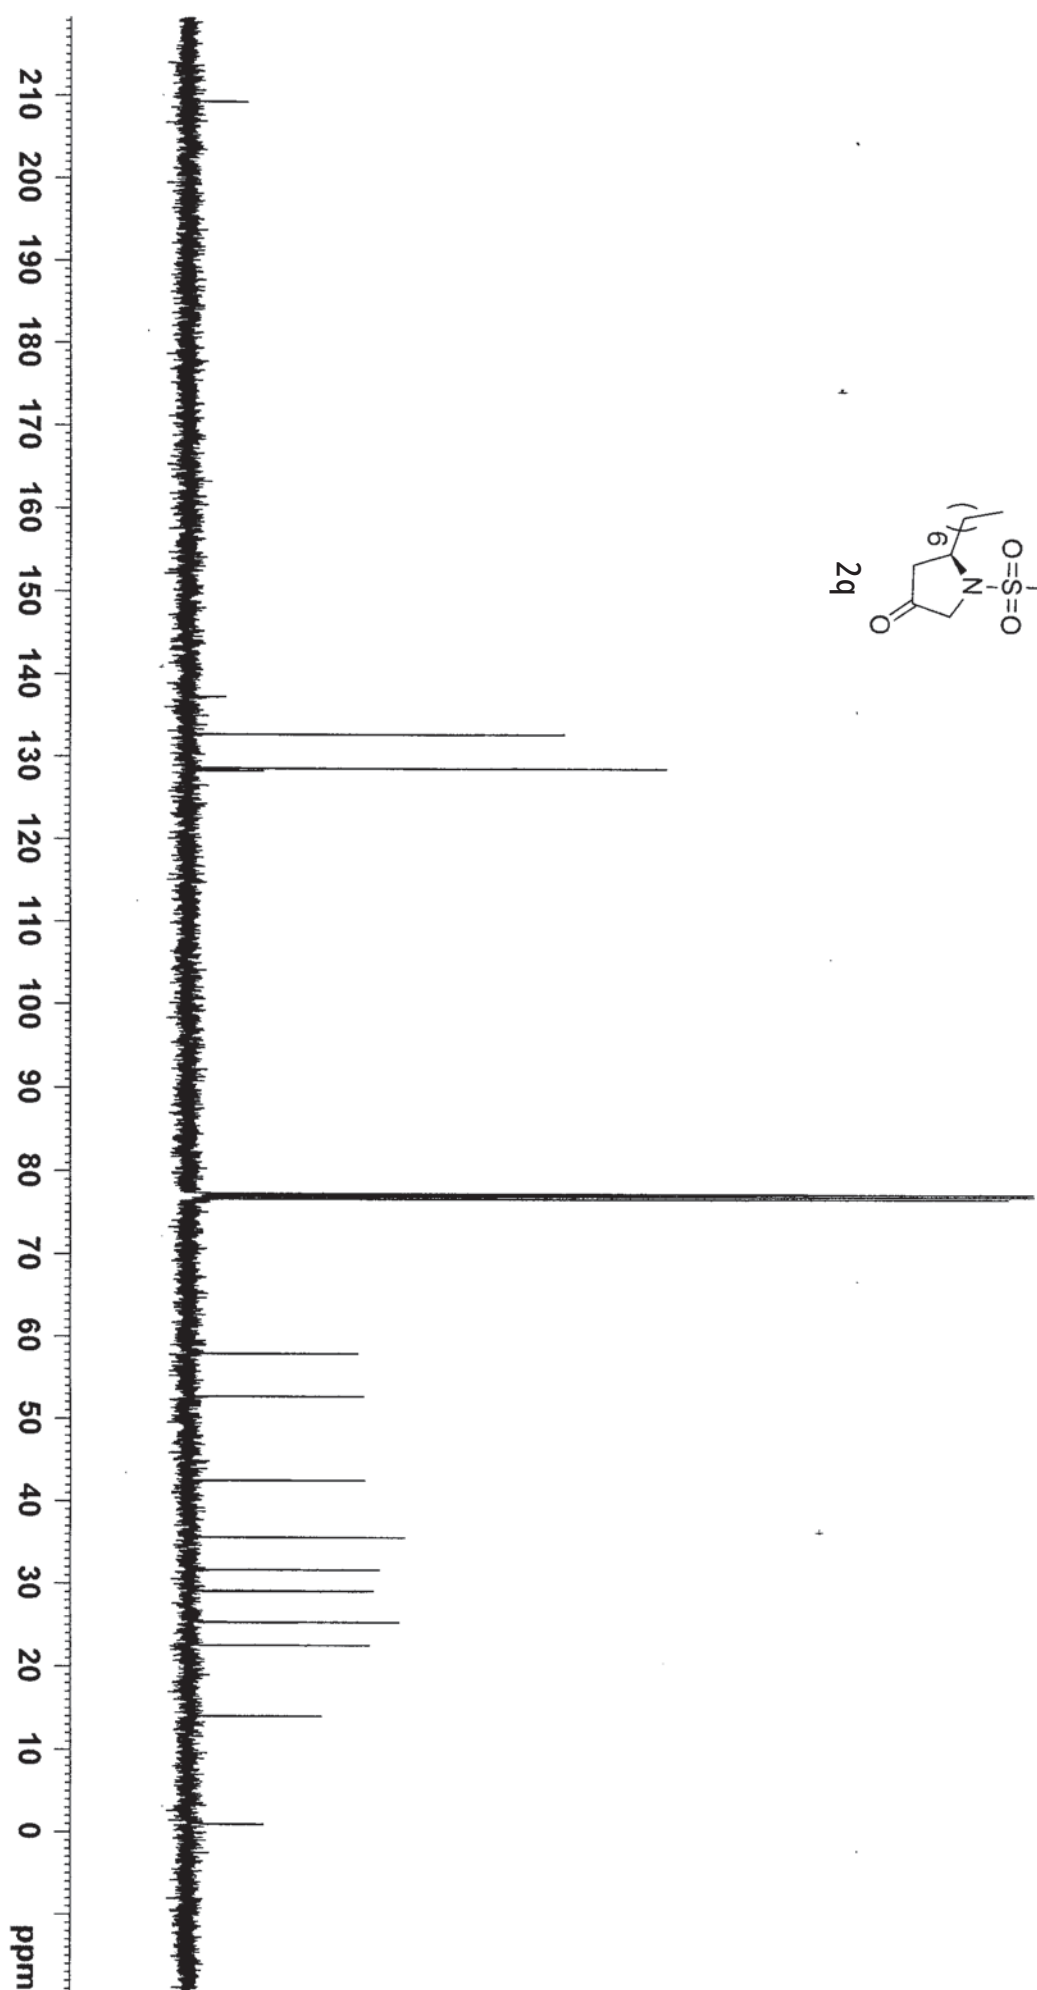

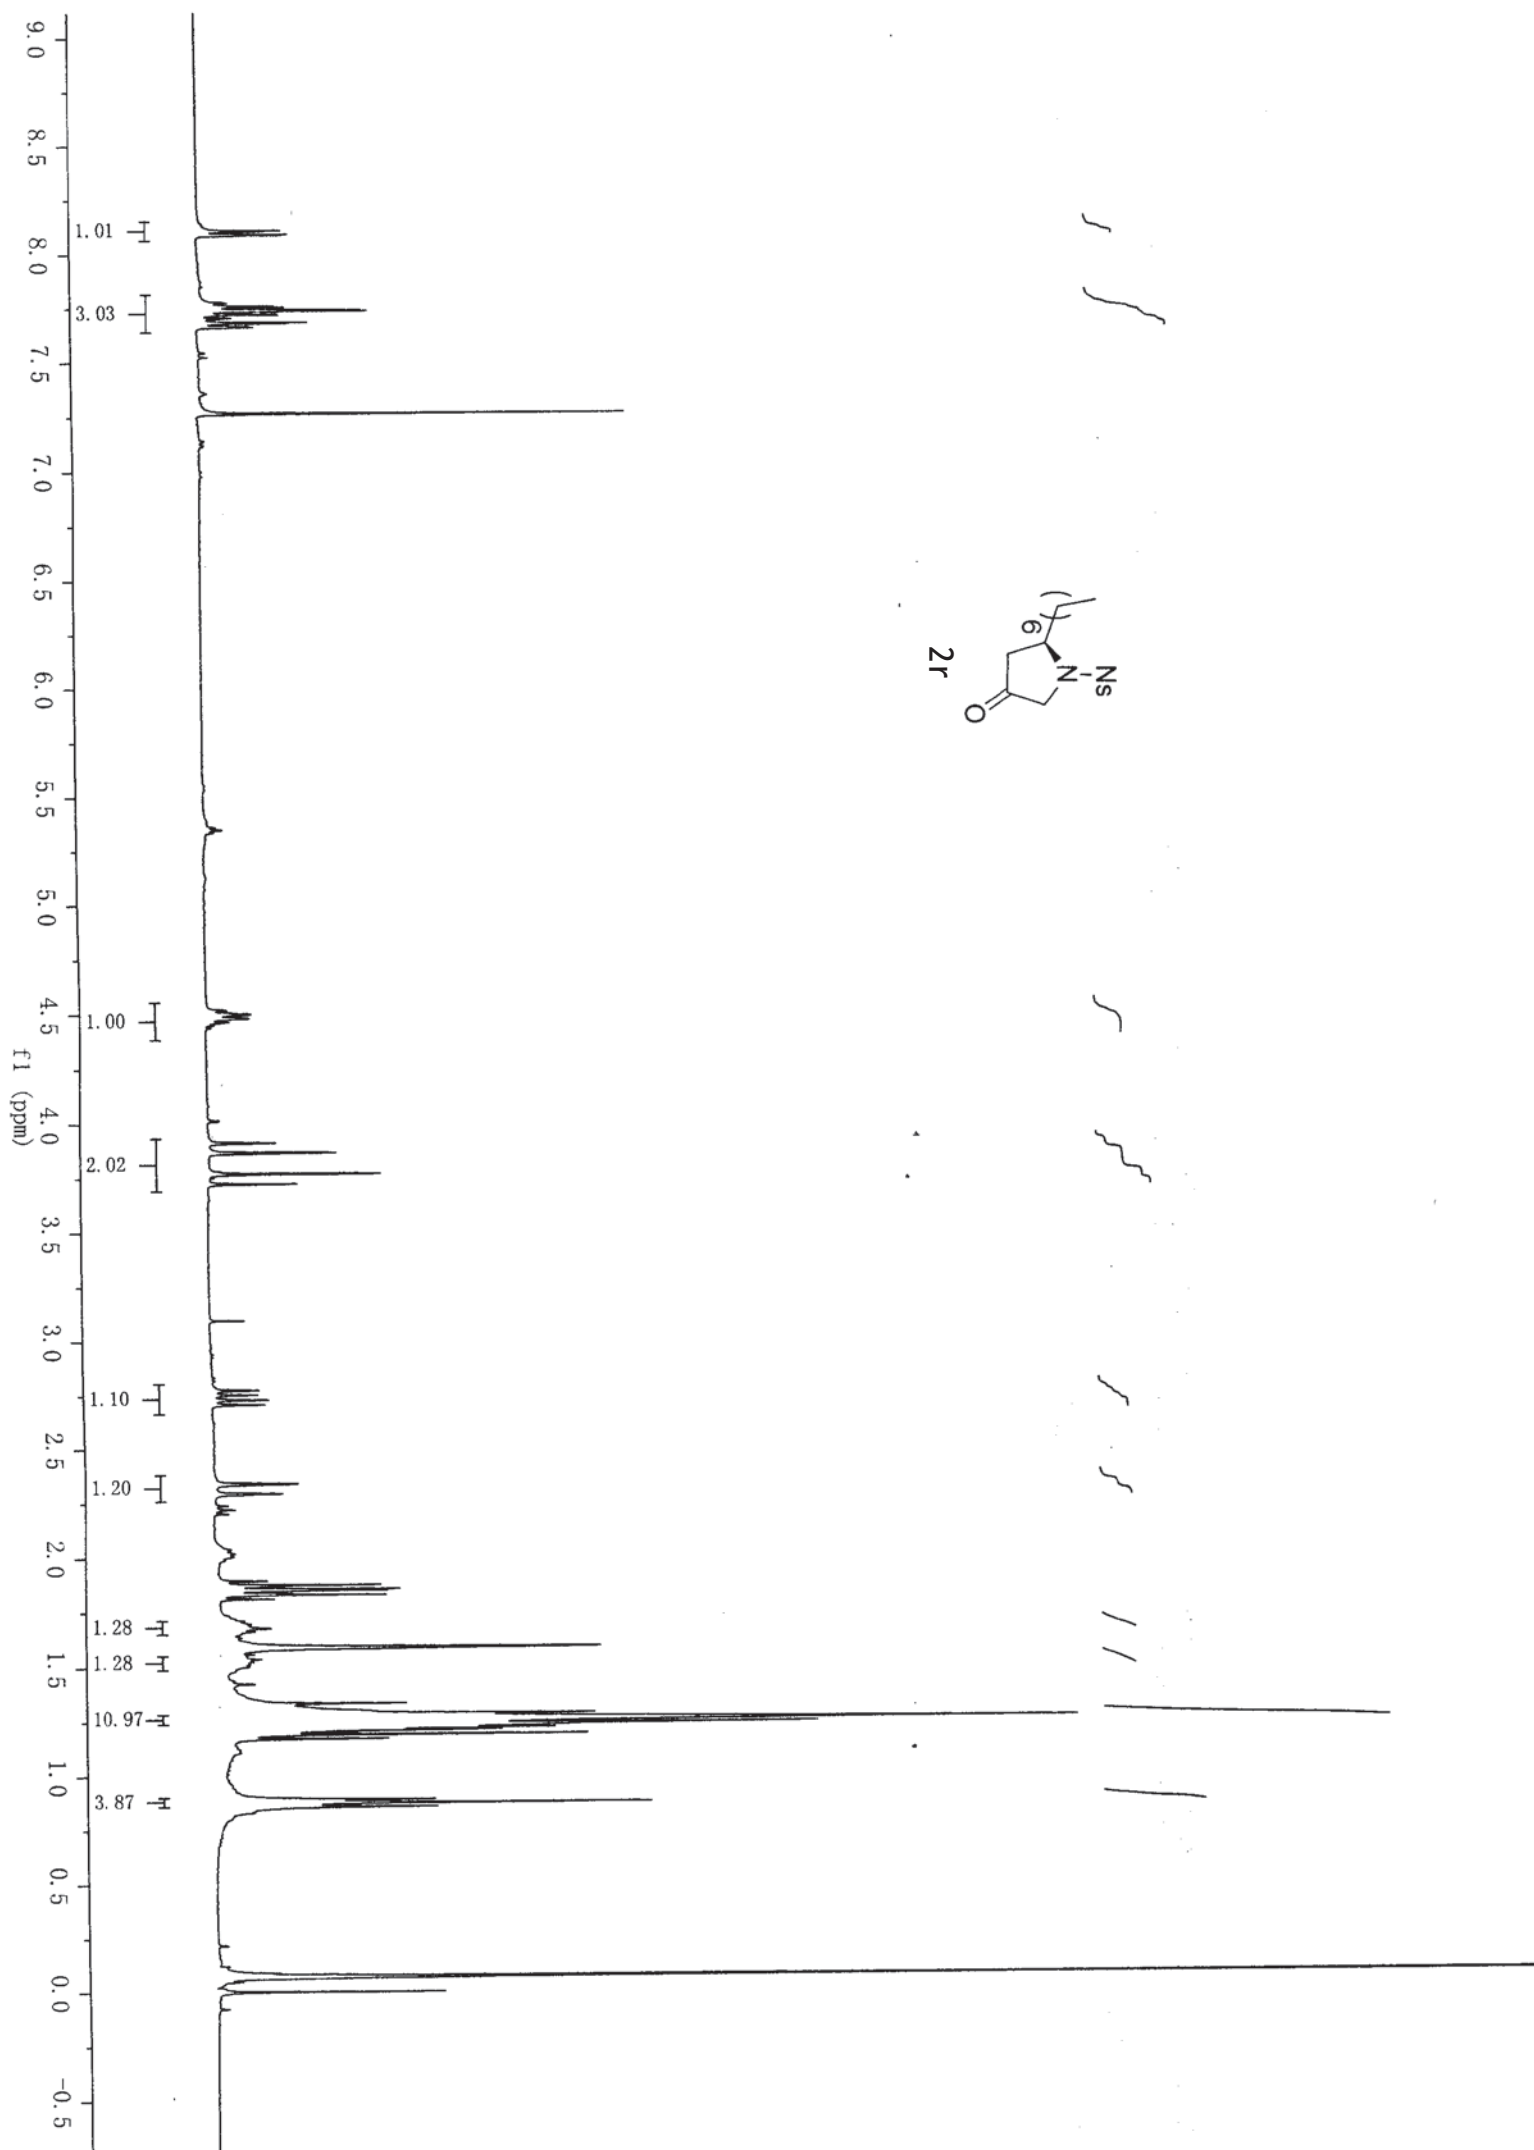

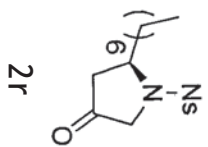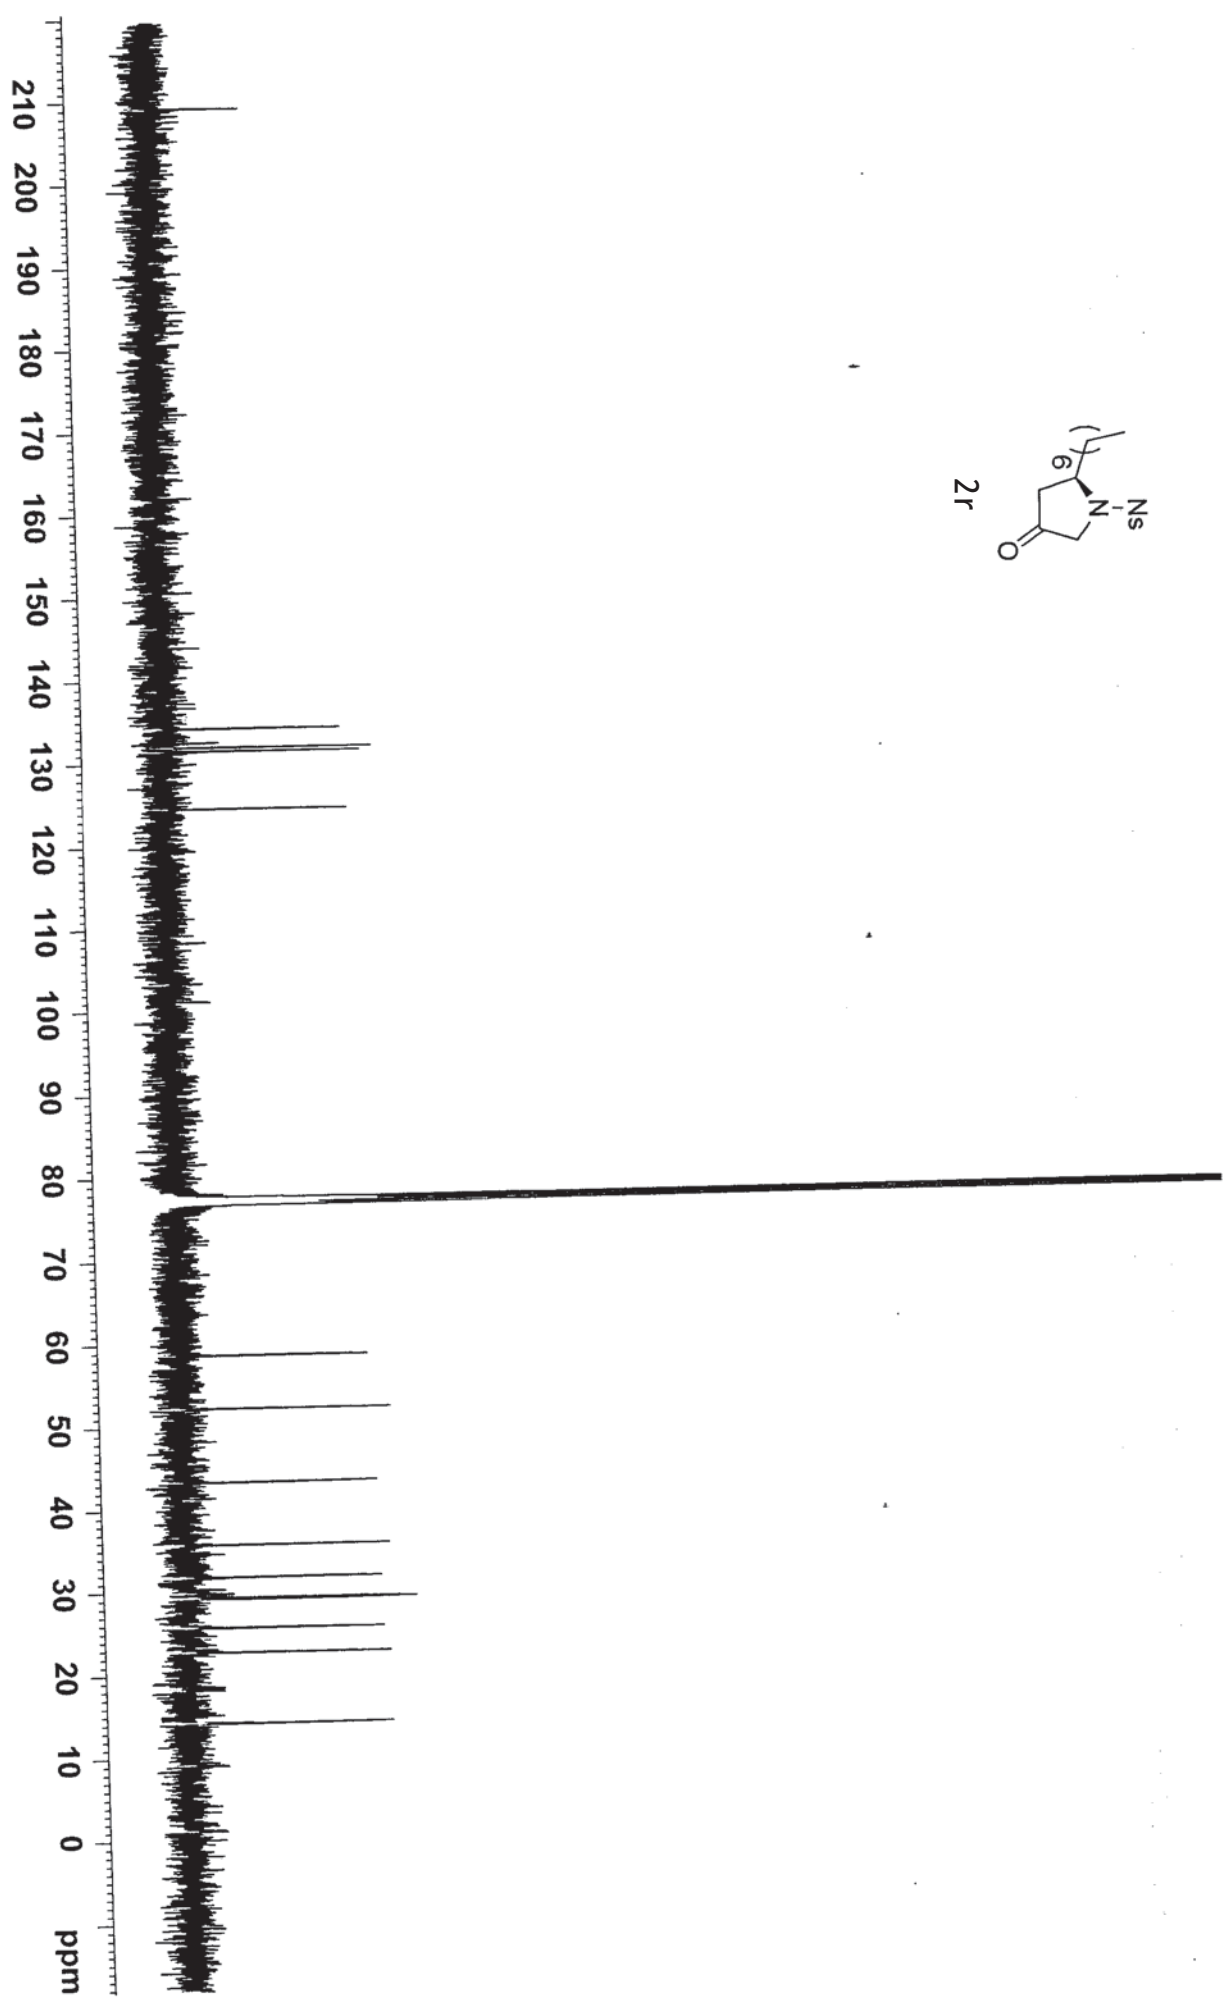

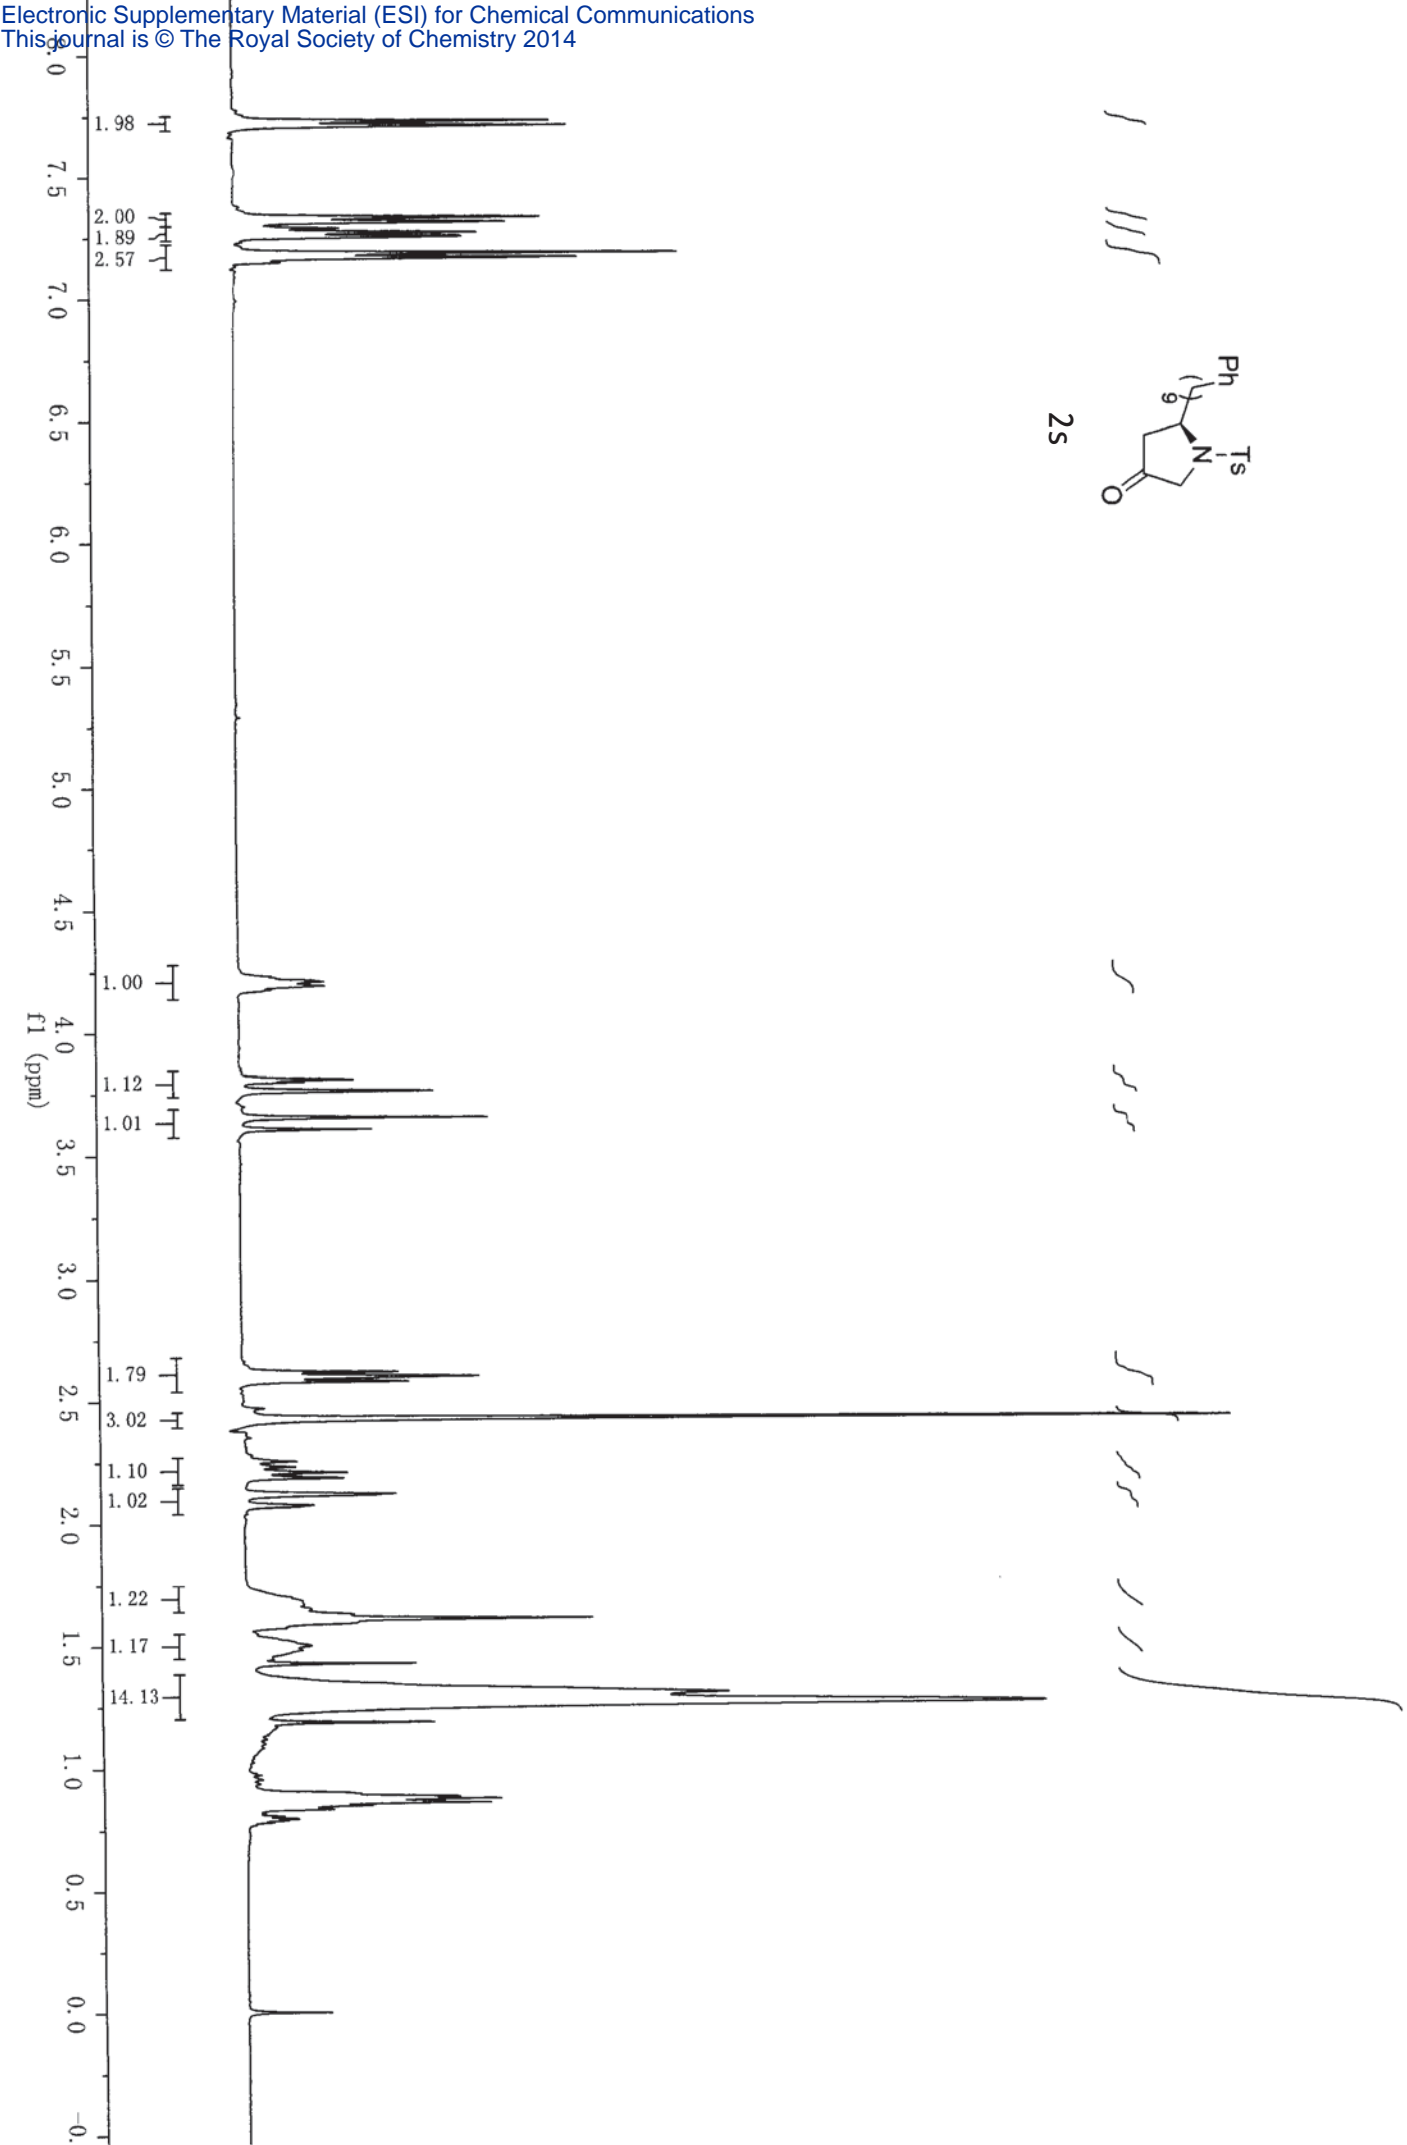



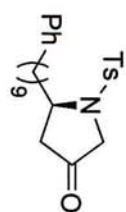

25

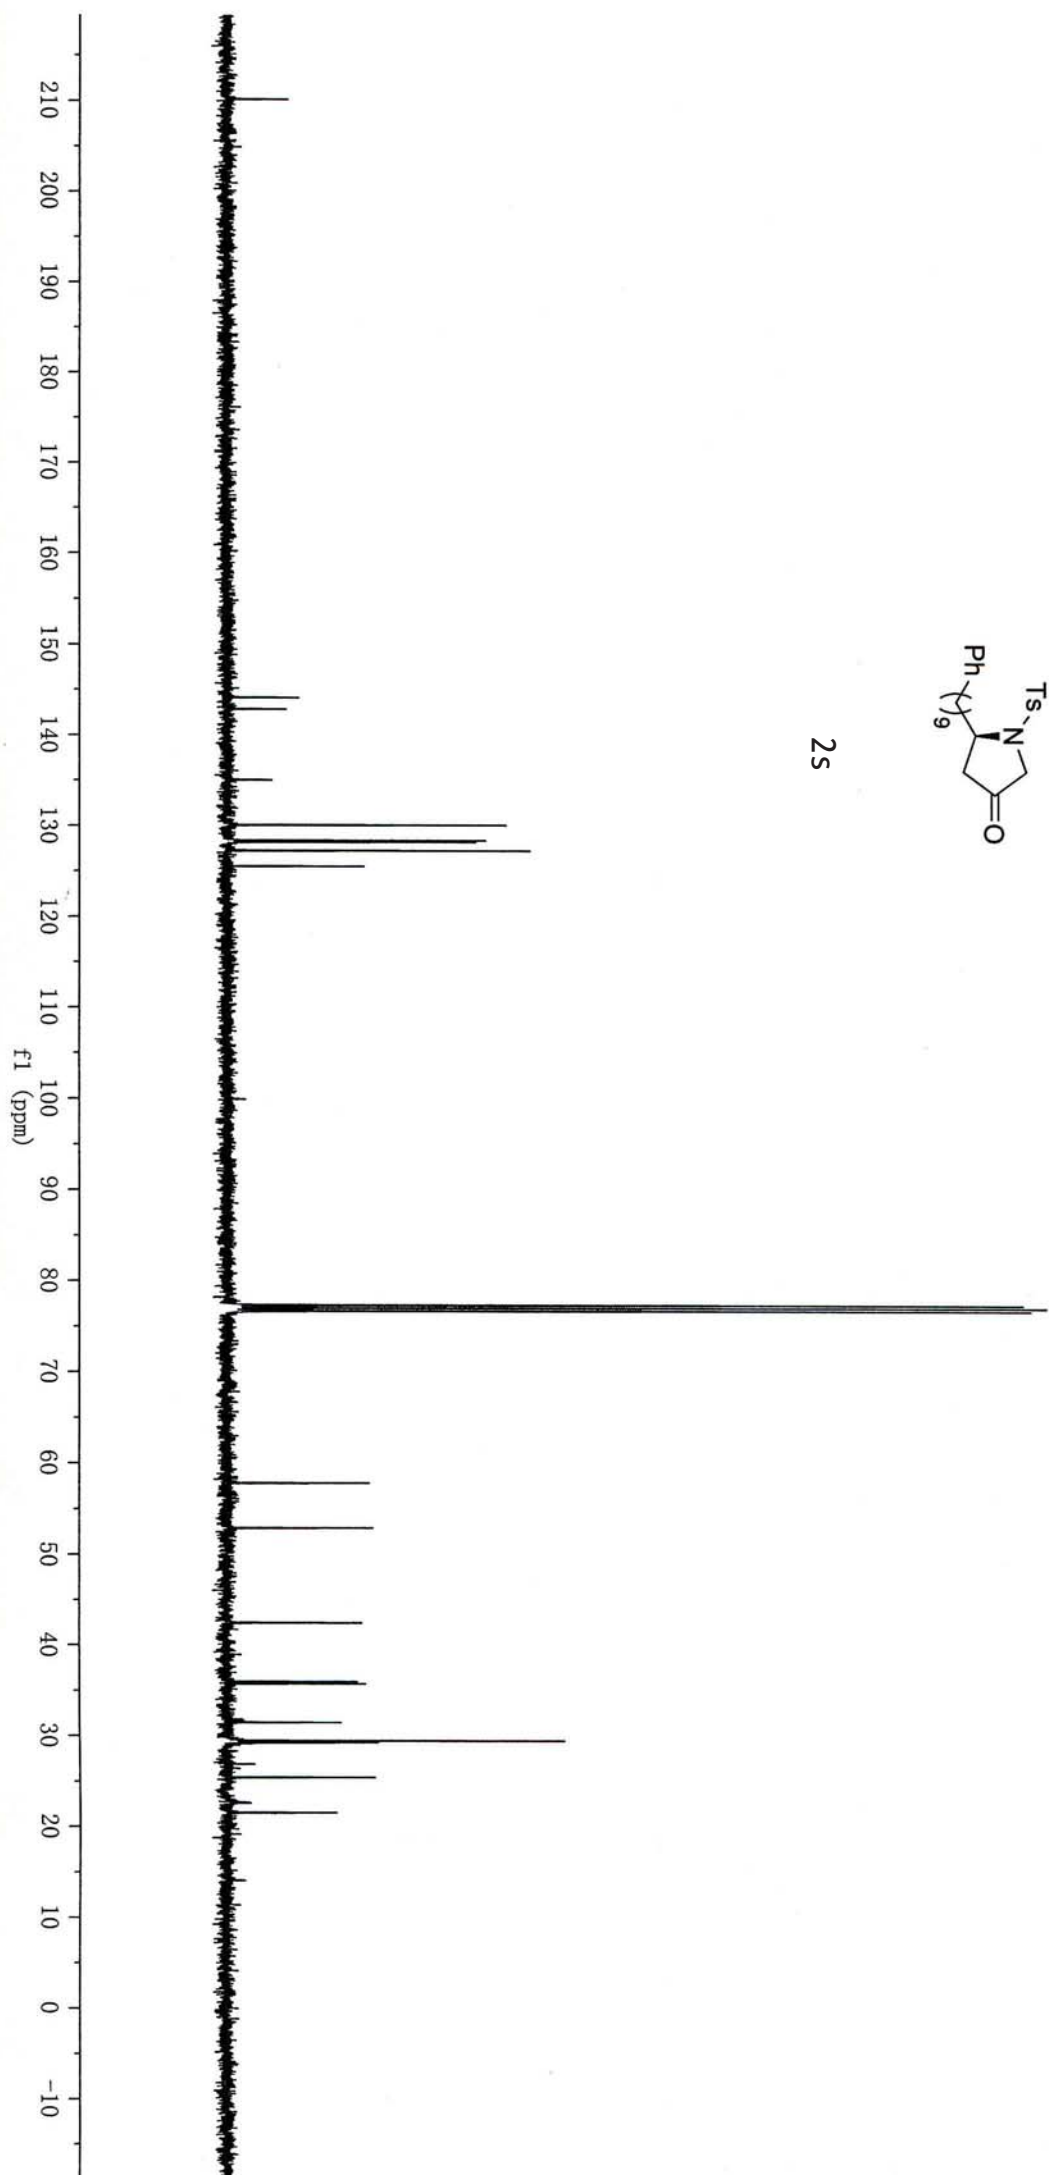

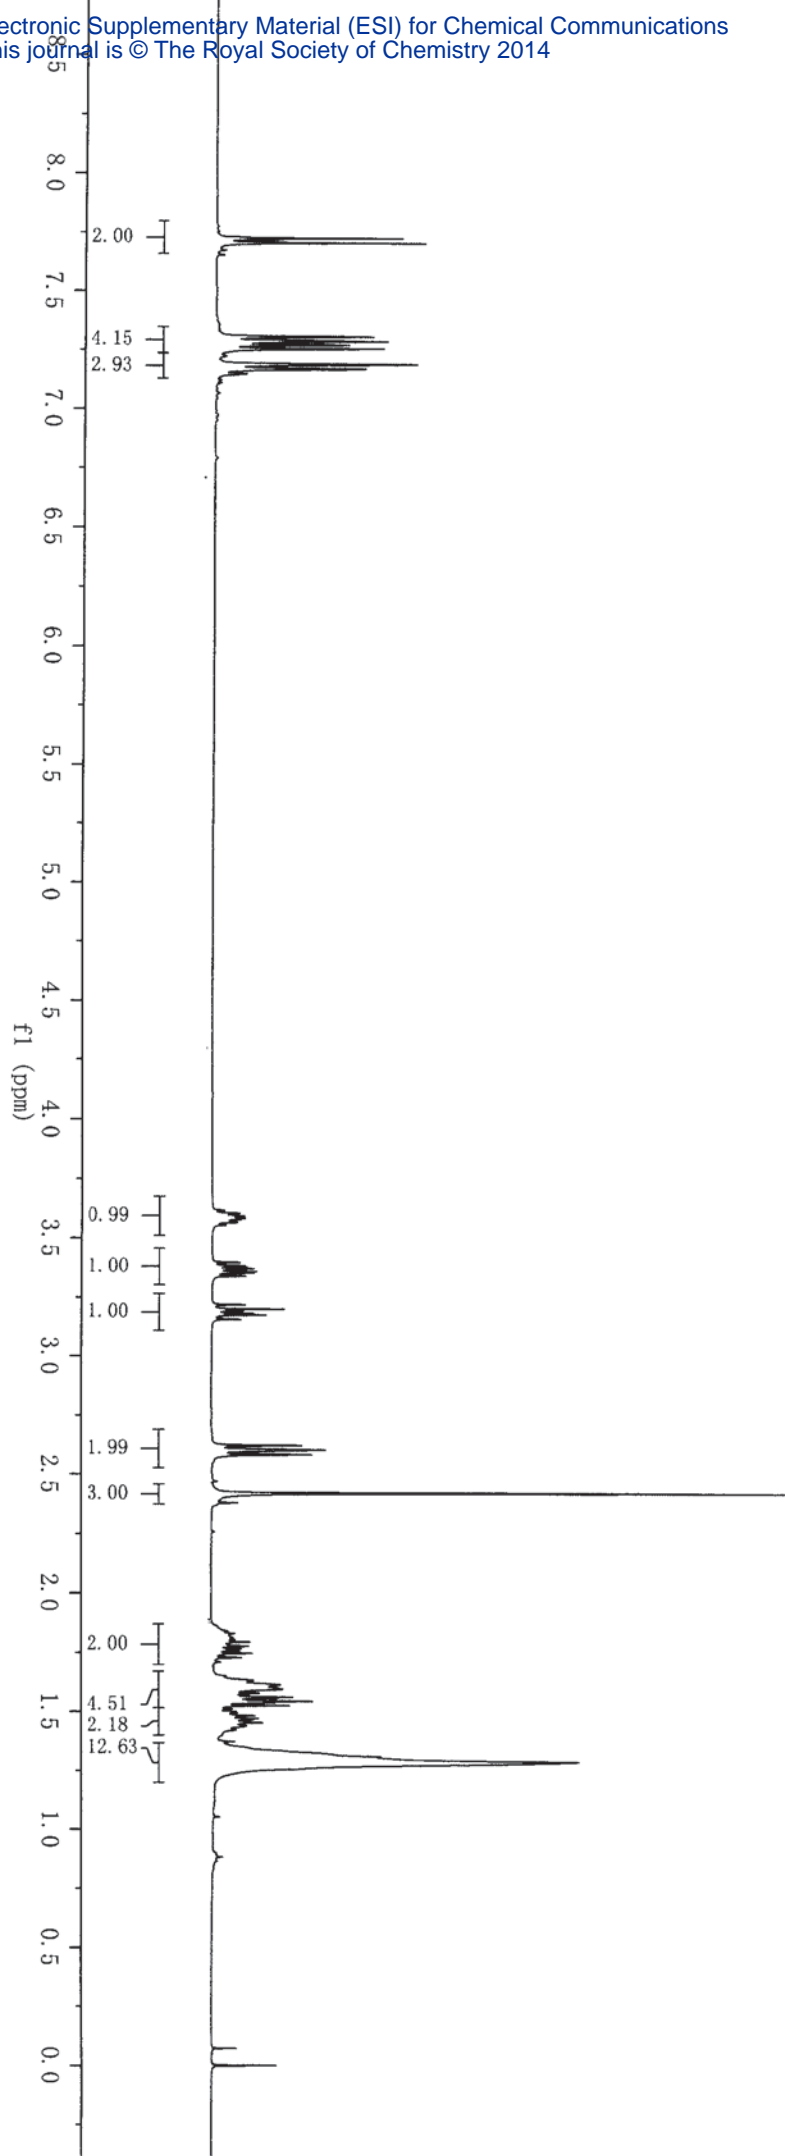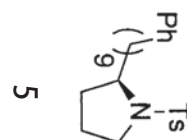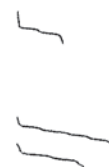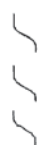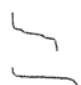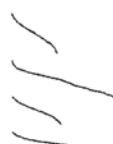

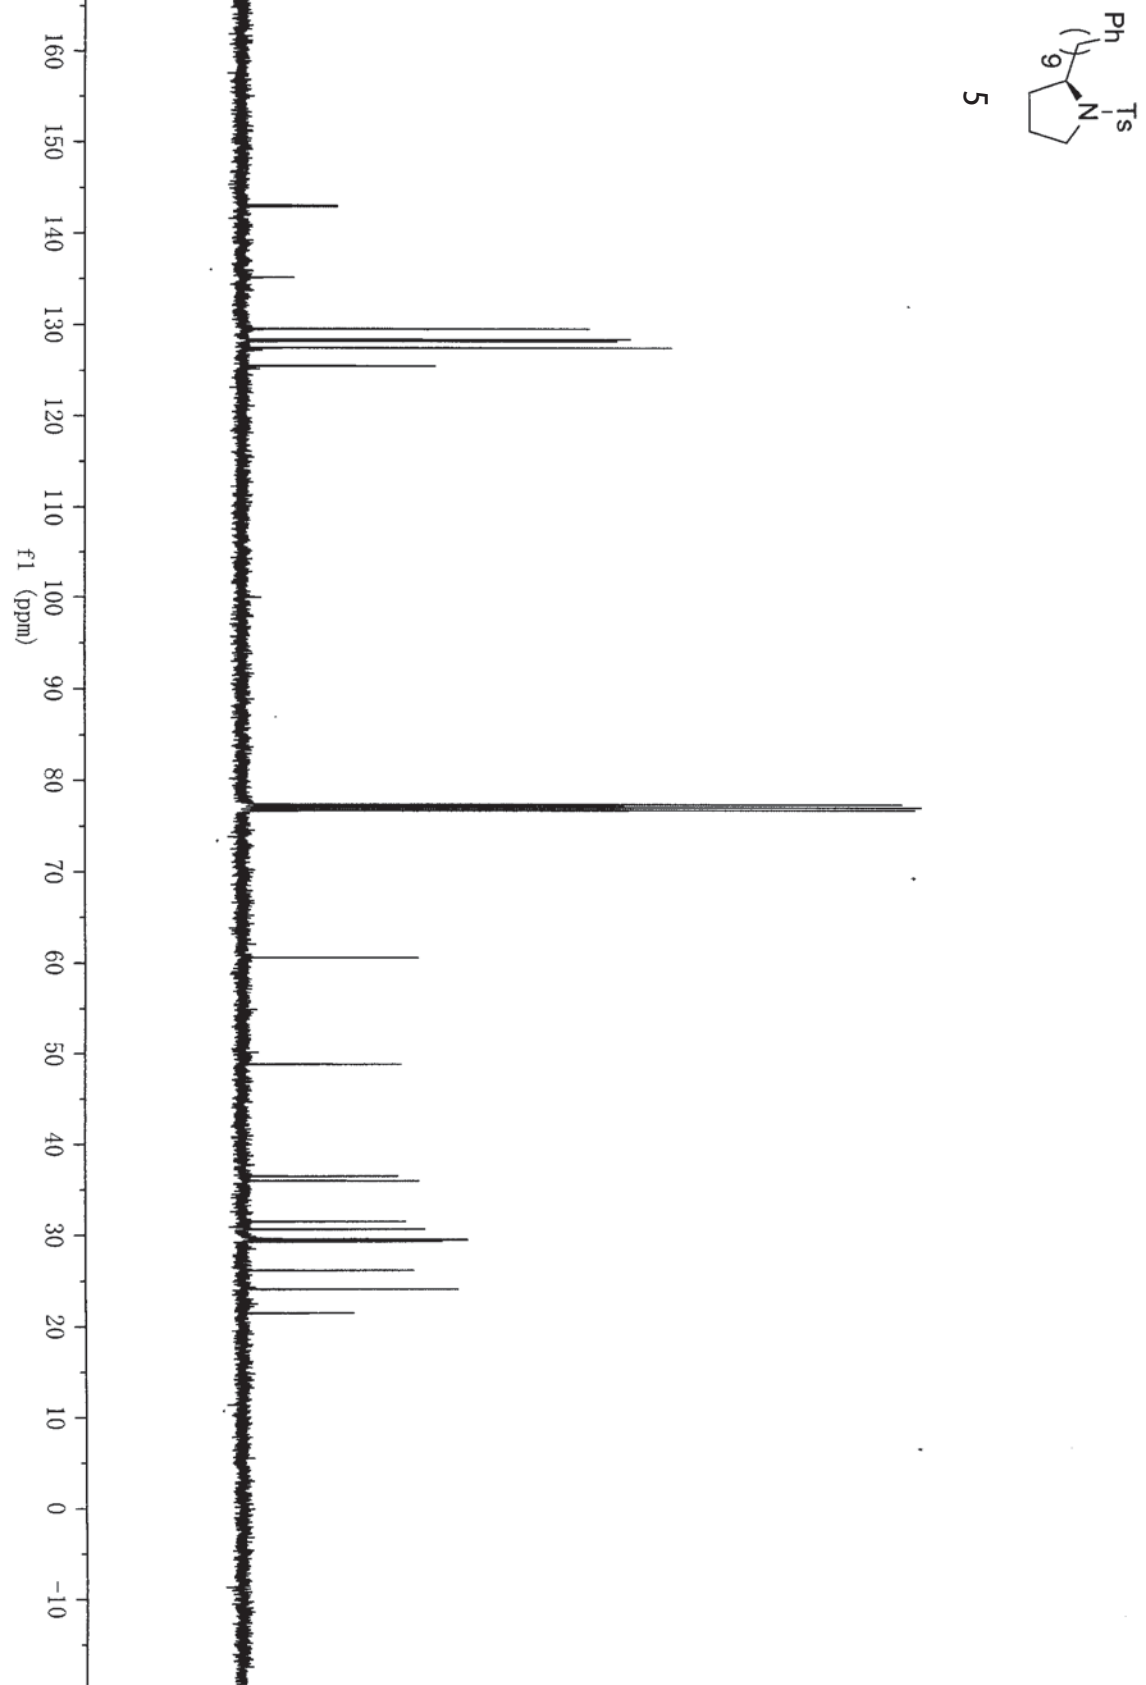

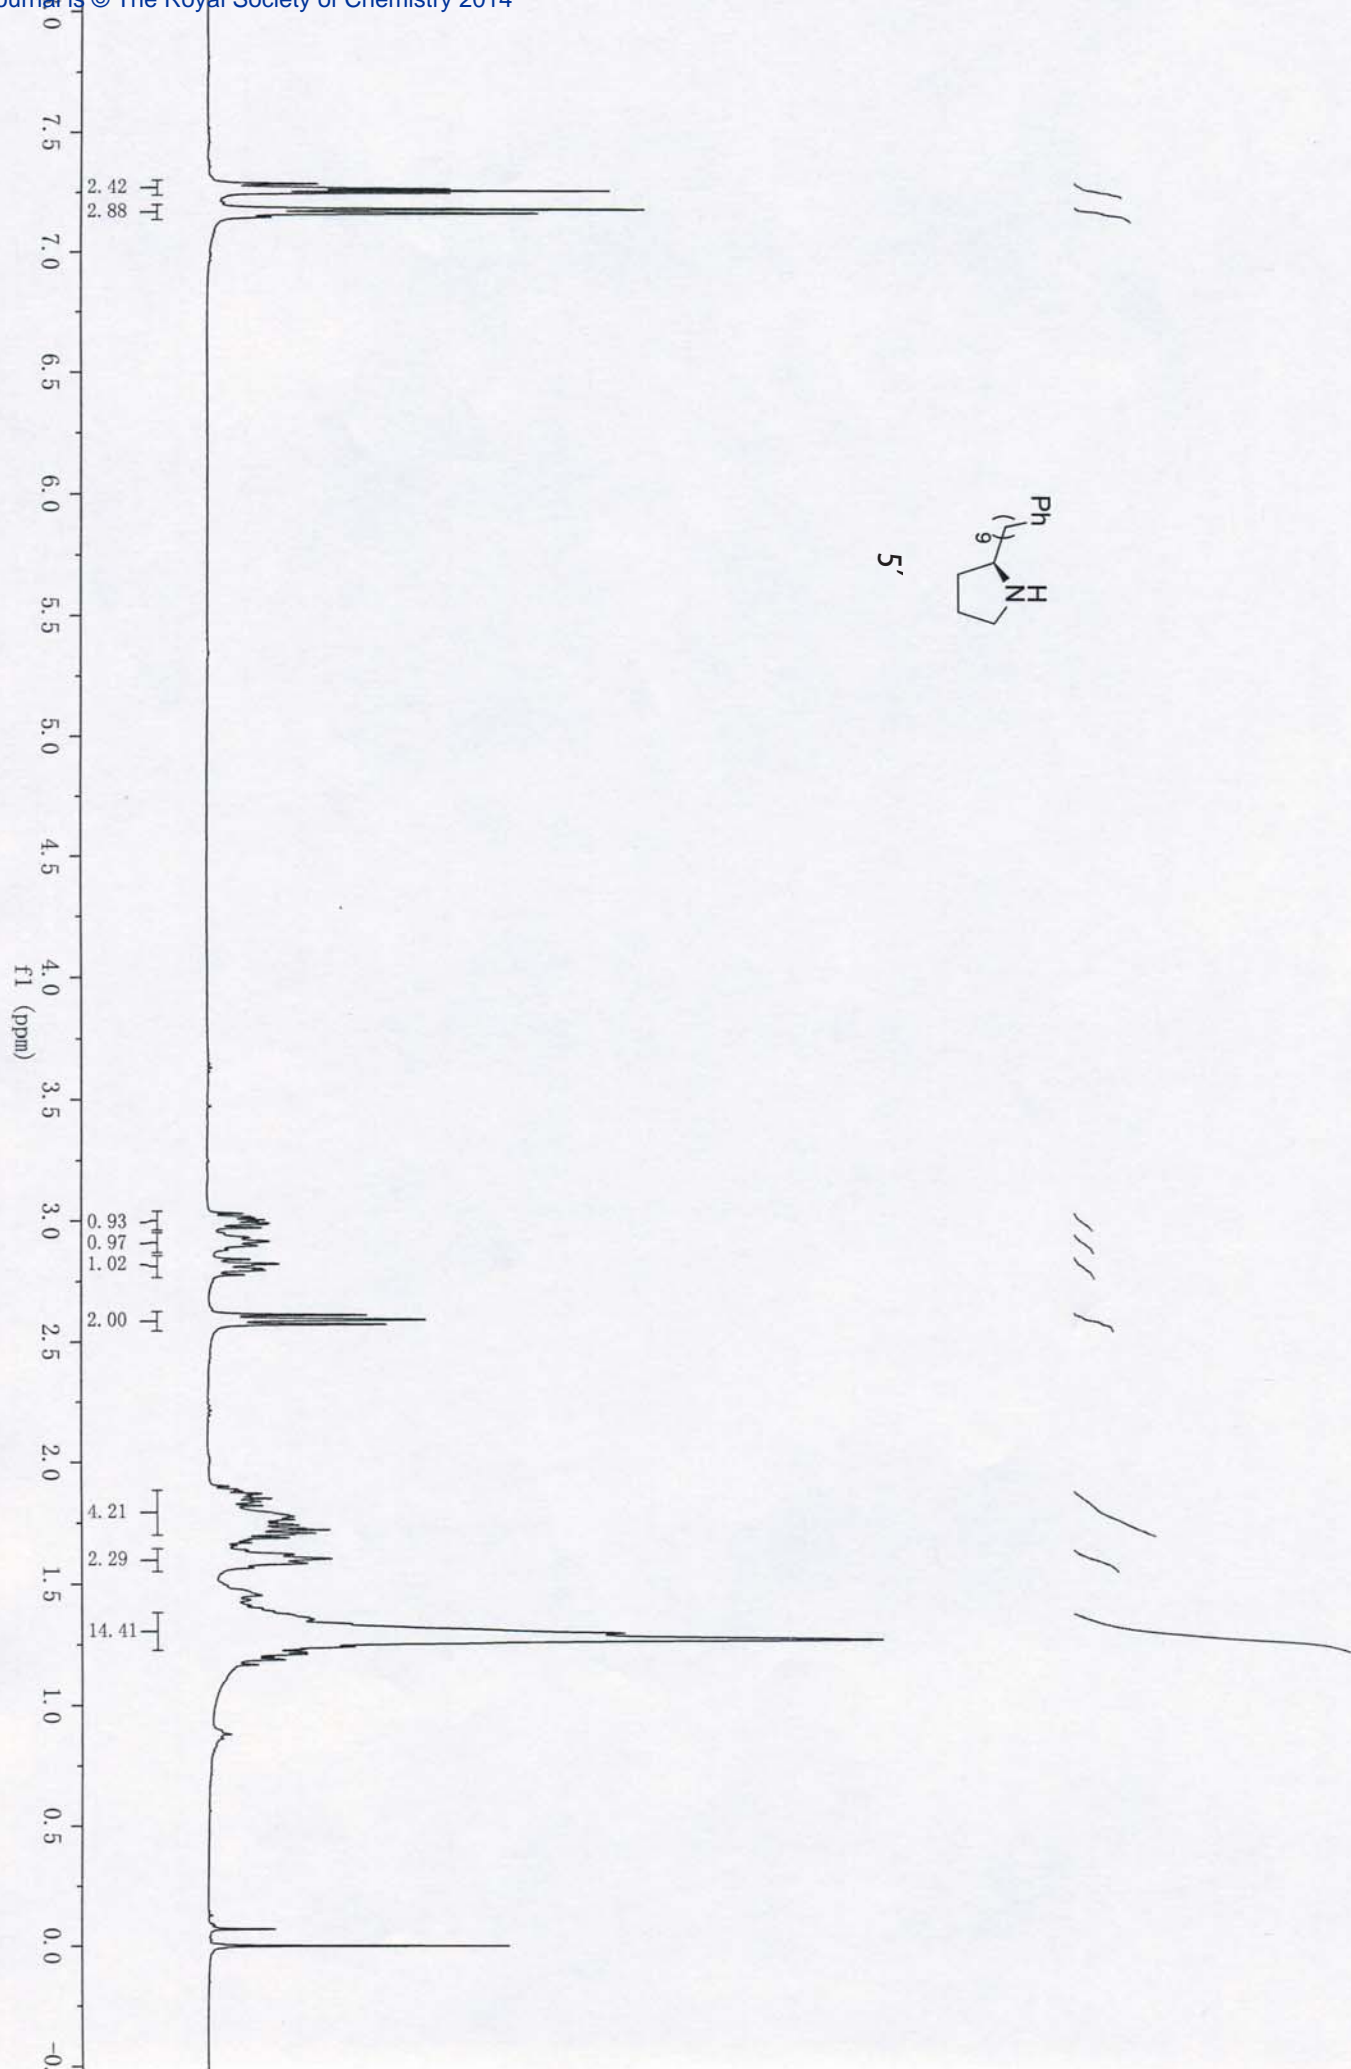

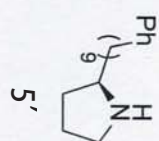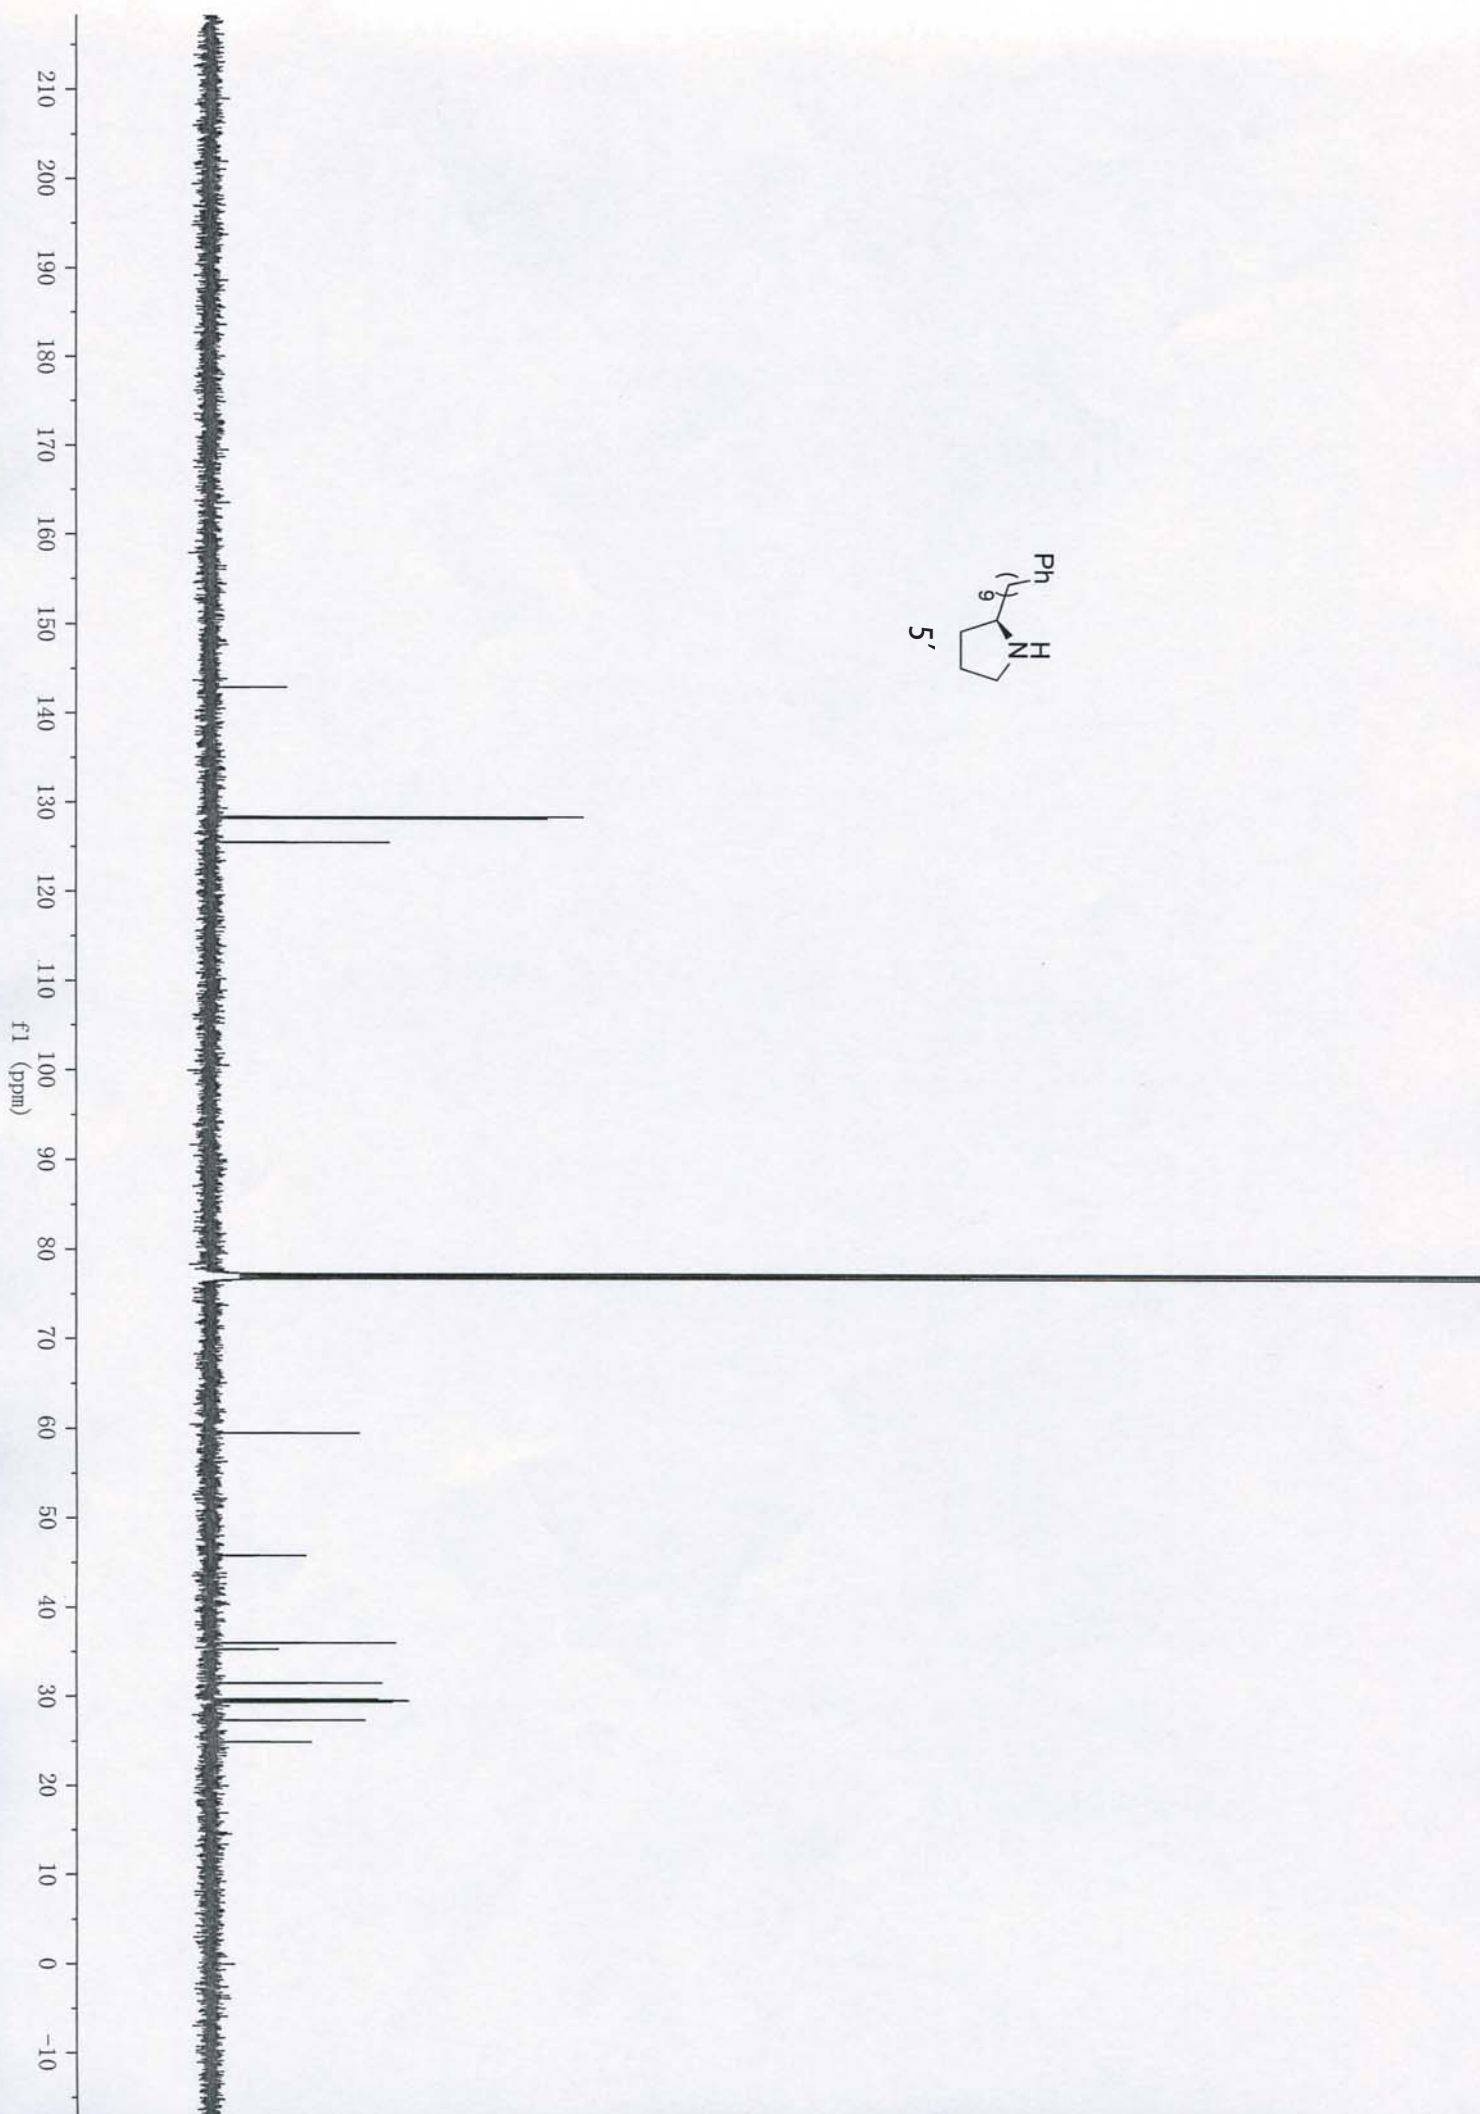

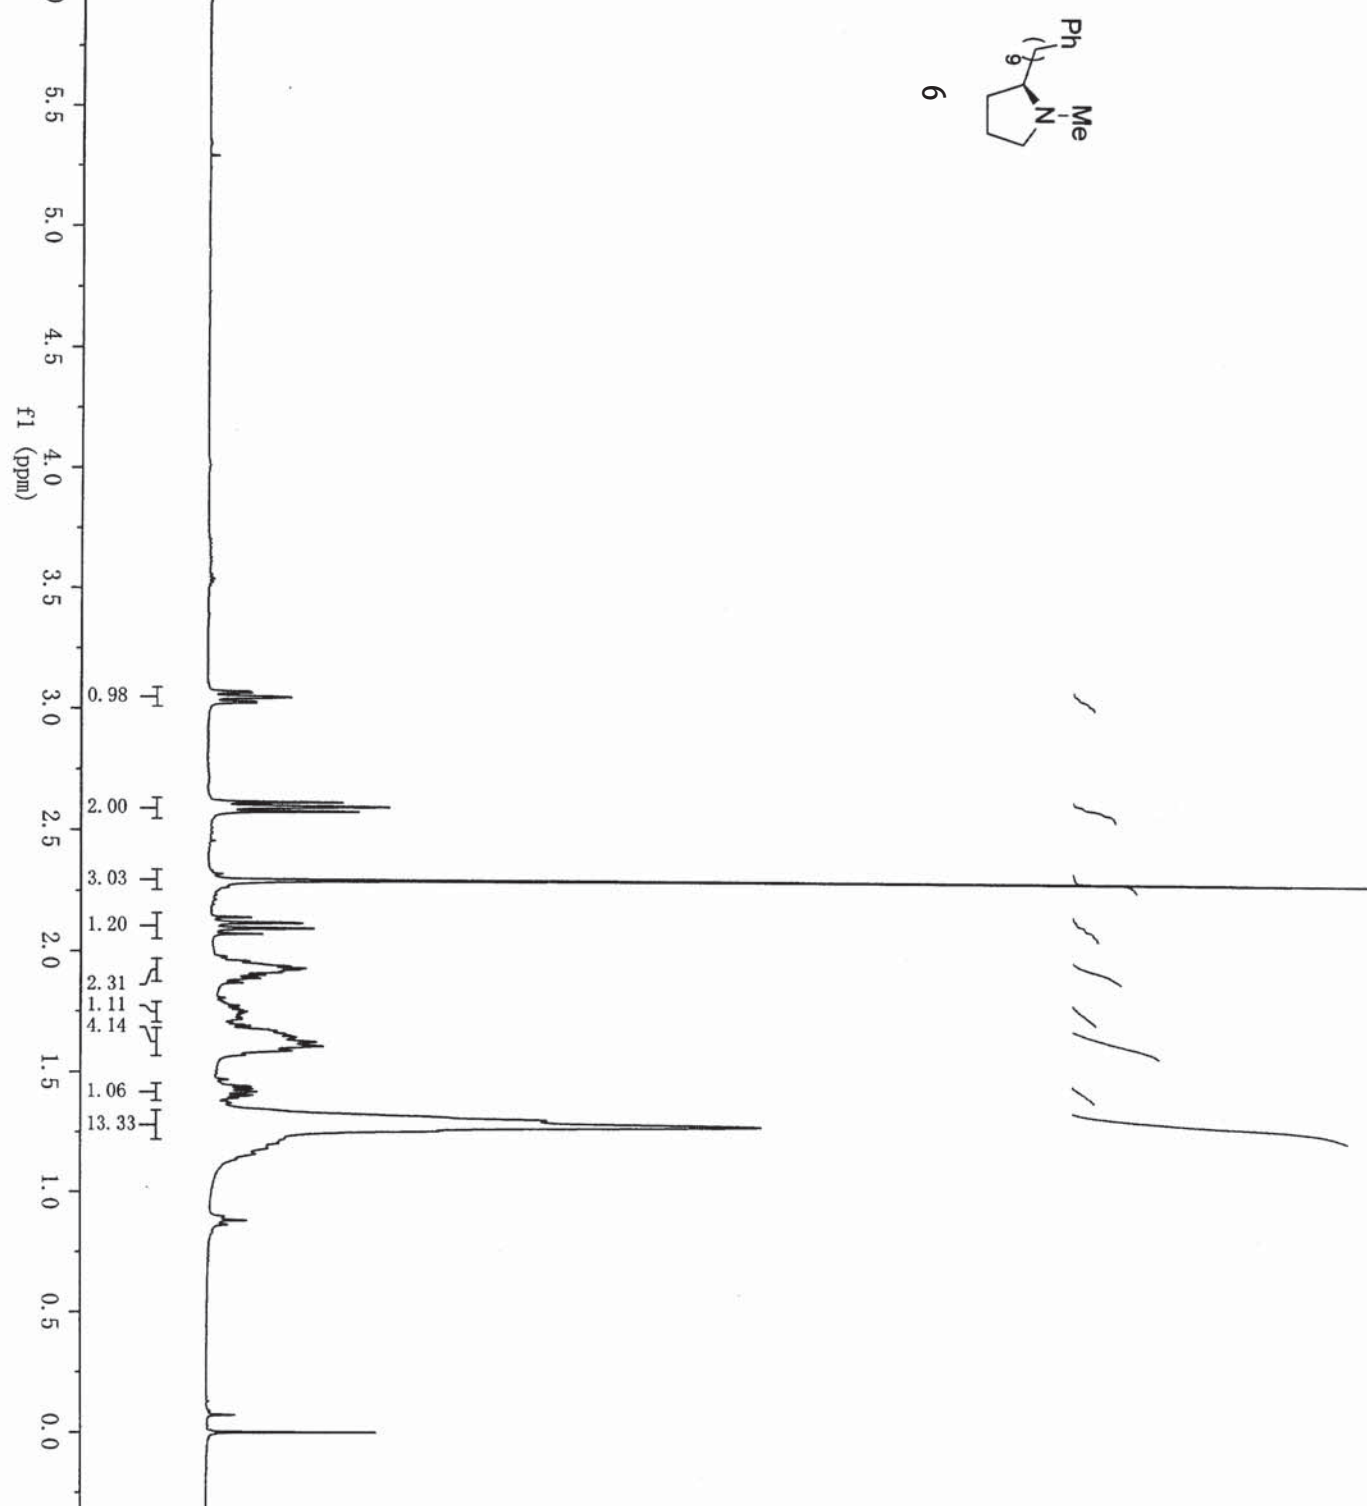

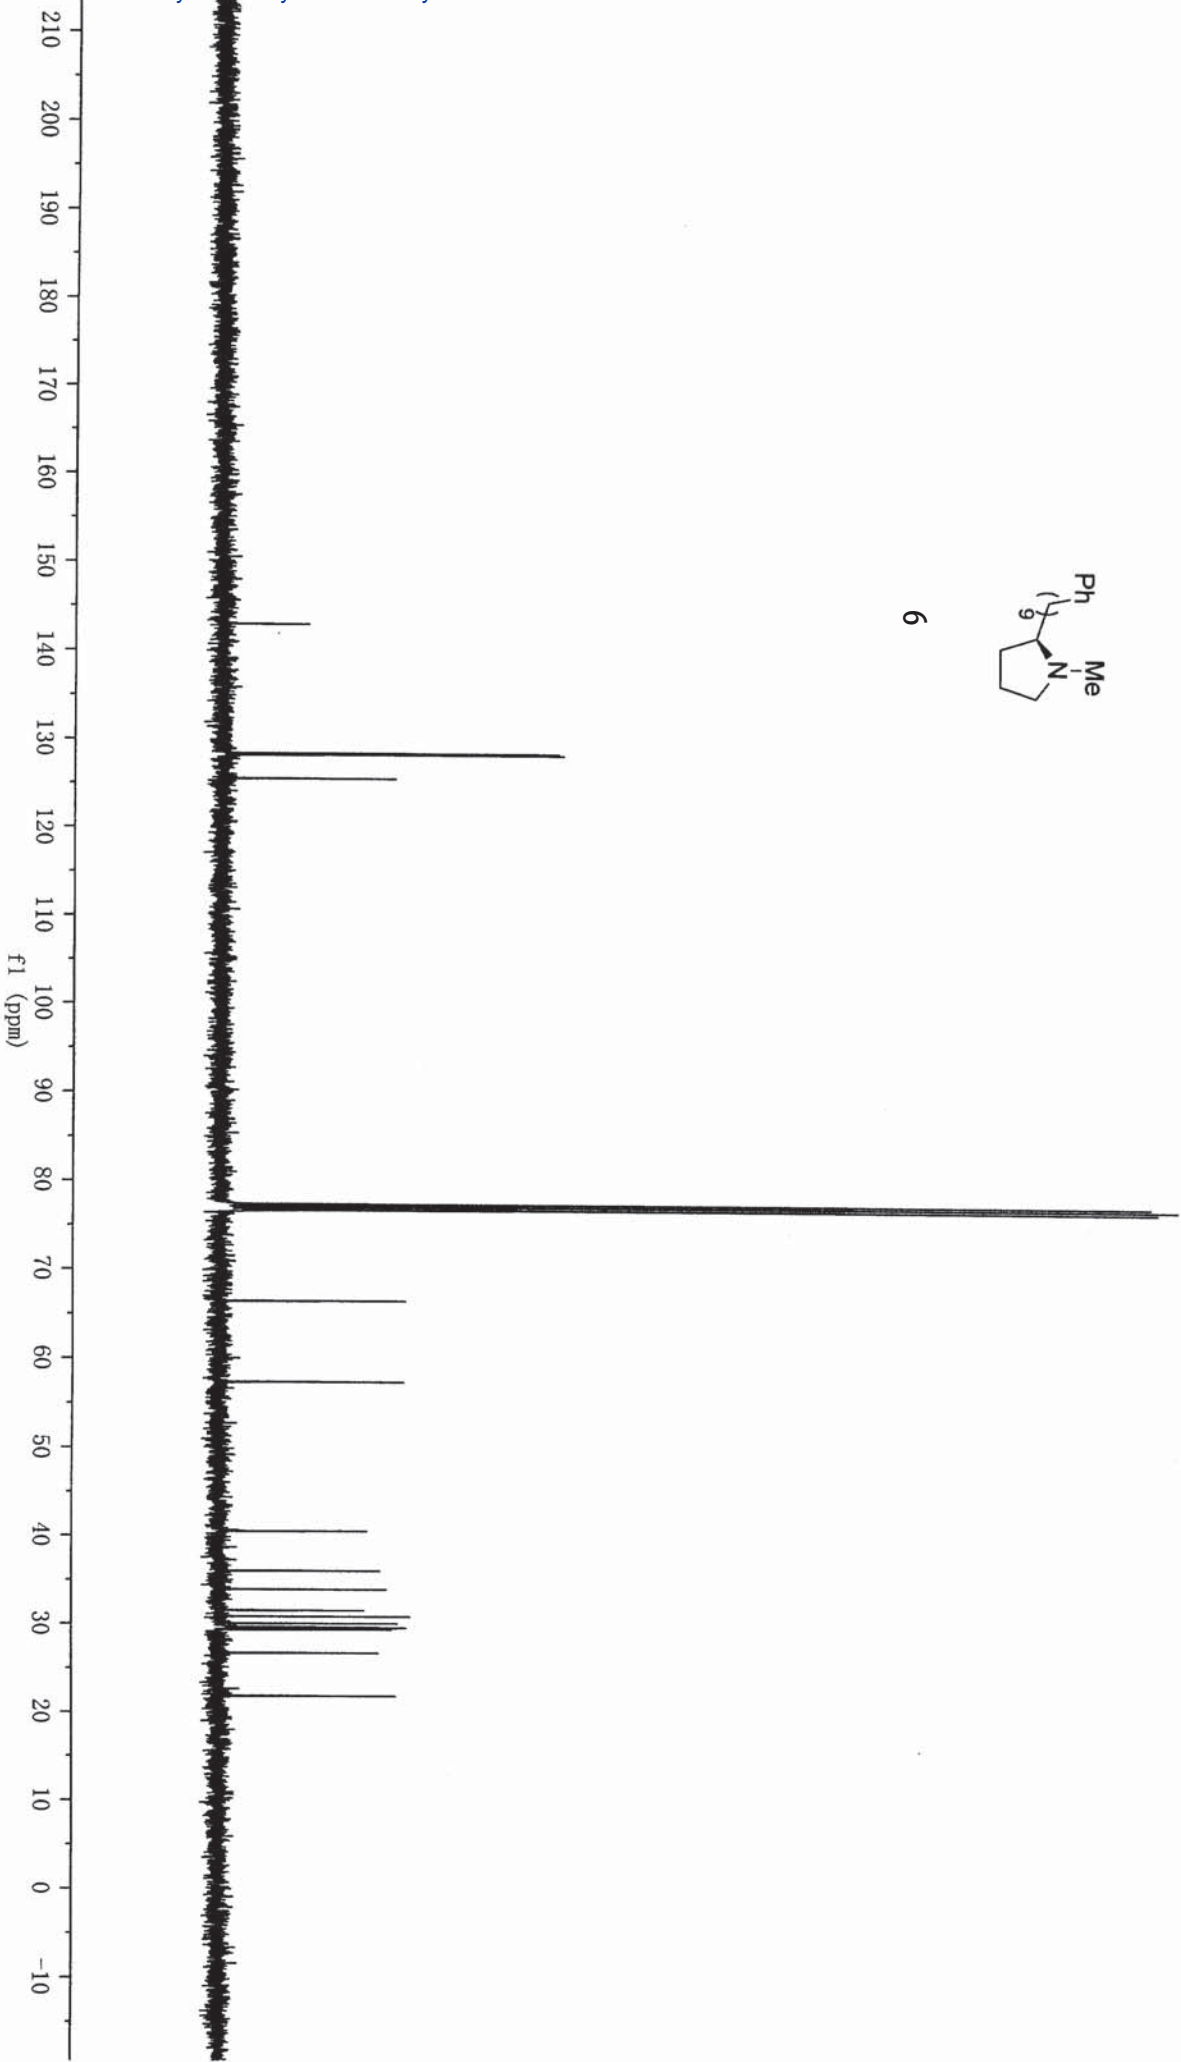

6

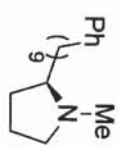

Supplement: c3cc49238a.pdf [file c3cc49238a.pdf]
